# Supplementary material for: A network analysis of gene co-expression in post-mortem brain tissues identifying novel genes and biological pathways underlying major depression
Source: Front Psychiatry. 2025 Jul 11;16:1556983. doi: 10.3389/fpsyt.2025.1556983 (PMC12289680; doi:10.3389/fpsyt.2025.1556983)
Supplement: Supplementary file 1 [file Table1.xlsx]

## Sheet: AnCg Schizophrenia vs Control
GeneID	Description	Symbol	log2FoldChange	pvalue	padj	lfcSE	stat	baseMean	up:1544	down:106
285972	long intergenic non-protein coding RNA 996	LINC00996	-1.06	0.00483	0.0607858	0.3773	-2.82	21.8
4973	oxidized low density lipoprotein receptor 1	OLR1	-0.962	0.000826	0.0272919	0.2876	-3.34	131.87
285834	HLA complex group 22 (gene/pseudogene)	HCG22	-0.957	0.00183	0.038017	0.3072	-3.12	41.56
5996	regulator of G protein signaling 1	RGS1	-0.952	0.0575	0.190847	0.5014	-1.9	99.32
3687	integrin subunit alpha X	ITGAX	-0.812	2.34e-05	0.0064172	0.192	-4.23	374.68
22953	purinergic receptor P2X 2	P2RX2	-0.801	0.0393	0.157994	0.3885	-2.06	46.8
100132147	long intergenic non-protein coding RNA 1783	LINC01783	-0.792	0.00299	0.0478107	0.2667	-2.97	11.33
6750	somatostatin	SST	-0.761	2.25e-05	0.0063582	0.1795	-4.24	1072.61
3553	interleukin 1 beta	IL1B	-0.75	0.135	0.306132	0.5016	-1.49	39.65
116437	long intergenic non-protein coding RNA 1257	LINC01257	-0.746	0.00245	0.0435435	0.2463	-3.03	72.82
1393	corticotropin releasing hormone binding protein	CRHBP	-0.733	1.42e-05	0.0055092	0.1688	-4.34	562.16
103689846	ADAMTS19 antisense RNA 1	ADAMTS19-AS1	-0.721	6.06e-06	0.0045646	0.1594	-4.52	17.04
7224	transient receptor potential cation channel subfamily C member 5	TRPC5	-0.719	0.00138	0.0333547	0.2249	-3.2	262.53
3689	integrin subunit beta 2	ITGB2	-0.712	0.00532	0.0631242	0.2553	-2.79	240.27
162998	olfactory receptor family 7 subfamily D member 2	OR7D2	-0.712	0.0471	0.172951	0.3585	-1.99	19.06
4481	macrophage scavenger receptor 1	MSR1	-0.697	0.00132	0.0326131	0.217	-3.21	34.59
7805	lysosomal protein transmembrane 5	LAPTM5	-0.695	0.00181	0.0377973	0.2226	-3.12	560.09
91703	aminoacylase 3	ACY3	-0.687	0.0268	0.131139	0.3102	-2.21	81.8
51284	toll like receptor 7	TLR7	-0.682	0.00342	0.0512805	0.2331	-2.93	35.26
2832	neuropeptides B and W receptor 2	NPBWR2	-0.68	0.0569	0.189572	0.3573	-1.9	18.44
55879	gamma-aminobutyric acid type A receptor subunit theta	GABRQ	-0.674	0.00515	0.0621851	0.2409	-2.8	1565.29
64805	purinergic receptor P2Y12	P2RY12	-0.673	0.0161	0.102929	0.2795	-2.41	251.98
5122	proprotein convertase subtilisin/kexin type 1	PCSK1	-0.665	0.000877	0.0281391	0.1998	-3.33	3362.18
23213	sulfatase 1	SULF1	-0.662	7.92e-05	0.0106796	0.1678	-3.95	813.02
4852	neuropeptide Y	NPY	-0.658	0.00155	0.0353355	0.2079	-3.17	592.73
728739	programmed cell death 2 pseudogene	LOC728739	-0.657	0.00119	0.0313564	0.2028	-3.24	18.24
100507534	long intergenic non-protein coding RNA 2192	LINC02192	-0.655	0.0068	0.0696232	0.2418	-2.71	45.26
400935	interleukin 17 receptor E like	IL17REL	-0.648	0.0135	0.0948487	0.2624	-2.47	46.99
105373331	uncharacterized LOC105373331	LOC105373331	-0.645	0.000295	0.0169742	0.1781	-3.62	11.58
100133941	CD24 molecule	CD24	-0.644	0.000532	0.0219843	0.1859	-3.46	704.53
2354	FosB proto-oncogene, AP-1 transcription factor subunit	FOSB	-0.642	0.00294	0.0474072	0.216	-2.97	602.44
110091777	uncharacterized LOC110091777	LOC110091777	-0.639	0.0509	0.180141	0.3275	-1.95	69.23
105370589	uncharacterized LOC105370589	LOC105370589	-0.638	0.000978	0.0289296	0.1934	-3.3	225.57
241	arachidonate 5-lipoxygenase activating protein	ALOX5AP	-0.634	0.0125	0.0914899	0.2539	-2.5	29.83
51744	CD244 molecule	CD244	-0.633	0.00157	0.0356085	0.2003	-3.16	30.29
101928251	uncharacterized LOC101928251	LOC101928251	-0.63	0.012	0.089839	0.2507	-2.51	43.11
64581	C-type lectin domain containing 7A	CLEC7A	-0.629	0.0133	0.0943542	0.254	-2.48	34.72
10170	dehydrogenase/reductase 9	DHRS9	-0.628	0.00119	0.0313564	0.1938	-3.24	29.81
2572	glutamate decarboxylase 2	GAD2	-0.625	0.000479	0.0206382	0.1791	-3.49	4000.51
55203	leucine rich repeat LGI family member 2	LGI2	-0.622	4.29e-05	0.0083839	0.152	-4.09	467.09
1133	cholinergic receptor muscarinic 5	CHRM5	-0.621	0.0512	0.180472	0.3183	-1.95	98.42
4929	nuclear receptor subfamily 4 group A member 2	NR4A2	-0.617	0.000937	0.0286703	0.1865	-3.31	808.27
100287718	ankyrin repeat domain 66	ANKRD66	-0.616	0.0097	0.0816015	0.238	-2.59	12.51
102723567	long intergenic non-protein coding RNA 2074	LINC02074	-0.616	0.000955	0.0288017	0.1864	-3.3	10.58
57369	gap junction protein delta 2	GJD2	-0.615	8.35e-05	0.0111364	0.1562	-3.93	152.71
92235	serine/threonine/tyrosine interacting like 2	STYXL2	-0.611	0.000193	0.0143451	0.1639	-3.73	118.36
5865	RAB3B, member RAS oncogene family	RAB3B	-0.608	0.000241	0.0157591	0.1655	-3.67	4856.63
150572	SET and MYND domain containing 1	SMYD1	-0.602	0.00761	0.0732782	0.2255	-2.67	83.02
102723675	uncharacterized LOC102723675	LOC102723675	-0.602	3.09e-05	0.0075514	0.1445	-4.17	391.85
92949	ADAMTS like 1	ADAMTSL1	-0.601	1.24e-05	0.0055092	0.1376	-4.37	169.93
8013	nuclear receptor subfamily 4 group A member 3	NR4A3	-0.601	0.00128	0.0321399	0.1867	-3.22	662.34
5368	prepronociceptin	PNOC	-0.597	0.00071	0.0255297	0.1763	-3.39	179.13
112267871	uncharacterized LOC112267871	LOC112267871	-0.595	0.0189	0.111448	0.2536	-2.35	14.37
440570	uncharacterized LOC440570	LOC440570	-0.595	0.0233	0.123567	0.2623	-2.27	35.62
1230	C-C motif chemokine receptor 1	CCR1	-0.591	0.0425	0.163988	0.2914	-2.03	31.16
100192379	uncharacterized LOC100192379	PP12613	-0.588	0.00514	0.0621319	0.2103	-2.8	94.67
140679	solute carrier family 32 member 1	SLC32A1	-0.586	0.0027	0.0455512	0.1953	-3	1960.64
718	complement C3	C3	-0.583	0.0334	0.146459	0.2741	-2.13	1754.17
6029	RNA component of signal recognition particle 7SL1	RN7SL1	-0.581	0.0357	0.151285	0.2767	-2.1	300
51384	Wnt family member 16	WNT16	-0.579	0.000131	0.0128823	0.1514	-3.83	102.94
285987	DLX6 antisense RNA 1	DLX6-AS1	-0.578	0.000738	0.0259144	0.1712	-3.37	273.12
57565	kelch like family member 14	KLHL14	-0.577	4.98e-05	0.0087674	0.1422	-4.06	83.66
388697	hornerin	HRNR	-0.577	0.014	0.0963549	0.2348	-2.46	84.58
257068	phosphatidylinositol specific phospholipase C X domain containing 2	PLCXD2	-0.575	0.00852	0.0770684	0.2187	-2.63	128.82
4544	melatonin receptor 1B	MTNR1B	-0.574	0.0256	0.12868	0.2573	-2.23	10.14
105377506	uncharacterized LOC105377506	LOC105377506	-0.574	0.00863	0.0776325	0.2184	-2.63	18.4
118788	phosphoinositide-3-kinase adaptor protein 1	PIK3AP1	-0.573	0.000558	0.0225116	0.1659	-3.45	75.66
5733	prostaglandin E receptor 3	PTGER3	-0.572	0.0066	0.0688456	0.2106	-2.72	419.93
101927691	uncharacterized LOC101927691	LOC101927691	-0.572	0.000441	0.0200336	0.1628	-3.51	15.89
107987206	replaced by ID 6029	LOC107987206	-0.568	0.0386	0.156514	0.2744	-2.07	303.68
1958	early growth response 1	EGR1	-0.567	0.0107	0.0852319	0.2223	-2.55	4482.47
94122	synaptotagmin like 5	SYTL5	-0.566	0.000337	0.0180994	0.1579	-3.59	394.41
1436	colony stimulating factor 1 receptor	CSF1R	-0.566	0.0157	0.101606	0.2341	-2.42	784.68
100462977	MT-RNR2 like 1 (pseudogene)	MTRNR2L1	-0.566	0.283	0.481124	0.5282	-1.07	4773.76
1592	cytochrome P450 family 26 subfamily A member 1	CYP26A1	-0.563	0.000338	0.0180994	0.1571	-3.58	81.22
2571	glutamate decarboxylase 1	GAD1	-0.561	0.000315	0.0174891	0.1556	-3.6	6361.06
9723	semaphorin 3E	SEMA3E	-0.556	0.00676	0.0694445	0.2054	-2.71	732.35
944	TNF superfamily member 8	TNFSF8	-0.553	0.0323	0.143861	0.2582	-2.14	10.68
3363	5-hydroxytryptamine receptor 7	HTR7	-0.552	0.00193	0.038867	0.1781	-3.1	220.14
105370066	uncharacterized LOC105370066	LOC105370066	-0.549	0.00198	0.0392119	0.1774	-3.09	30.73
105375743	uncharacterized LOC105375743	LOC105375743	-0.549	0.000832	0.0272919	0.1642	-3.34	21.83
1959	early growth response 2	EGR2	-0.547	0.0539	0.184578	0.2839	-1.93	208.5
23627	prion like protein doppel	PRND	-0.546	0.0503	0.17917	0.2787	-1.96	15.37
400120	serine rich and transmembrane domain containing 1	SERTM1	-0.544	0.00585	0.0657289	0.1974	-2.76	1334.36
3560	interleukin 2 receptor subunit beta	IL2RB	-0.544	0.0393	0.158089	0.2641	-2.06	16.12
344901	osteocrin	OSTN	-0.542	0.00326	0.0503452	0.1844	-2.94	138.3
90134	potassium voltage-gated channel subfamily H member 7	KCNH7	-0.542	0.00334	0.0508682	0.1848	-2.93	194.63
8471	insulin receptor substrate 4	IRS4	-0.541	0.000374	0.018861	0.152	-3.56	103.15
219972	macrophage expressed 1	MPEG1	-0.54	0.00608	0.0668814	0.1968	-2.74	63.27
54440	SAM and SH3 domain containing 3	SASH3	-0.54	0.0143	0.0974897	0.2206	-2.45	59.87
113218502	microRNA 10397	MIR10397	-0.539	0.0016	0.0357661	0.1708	-3.16	87.26
4745	neural EGFL like 1	NELL1	-0.538	0.00732	0.0723749	0.2005	-2.68	1244.78
85397	regulator of G protein signaling 8	RGS8	-0.537	0.00387	0.0545182	0.186	-2.89	703.05
102724965	uncharacterized LOC102724965	LOC102724965	-0.537	0.00843	0.0765476	0.204	-2.63	174.89
100128811	GPR158 antisense RNA 1	GPR158-AS1	-0.535	0.00466	0.0598241	0.1891	-2.83	104.97
4885	neuronal pentraxin 2	NPTX2	-0.534	0.00146	0.0341989	0.1677	-3.18	3397.72
3127	major histocompatibility complex, class II, DR beta 5	HLA-DRB5	-0.534	0.0676	0.207762	0.2922	-1.83	154.01
105378712	long intergenic non-protein coding RNA 2808	LINC02808	-0.531	0.0682	0.208858	0.2911	-1.82	14.3
2353	Fos proto-oncogene, AP-1 transcription factor subunit	FOS	-0.53	0.126	0.293498	0.3465	-1.53	2514.11
107986782	uncharacterized LOC107986782	LOC107986782	-0.53	0.0037	0.0535452	0.1827	-2.9	13.45
344838	progestin and adipoQ receptor family member 9	PAQR9	-0.528	0.000611	0.0238412	0.1542	-3.43	125.83
1524	C-X3-C motif chemokine receptor 1	CX3CR1	-0.528	0.107	0.266403	0.3278	-1.61	233.17
105375435	uncharacterized LOC105375435	LOC105375435	-0.528	0.0477	0.174529	0.2666	-1.98	20.74
378706	RNA component of signal recognition particle 7SL2	RN7SL2	-0.525	0.0536	0.18425	0.2719	-1.93	451.74
286133	scavenger receptor class A member 5	SCARA5	-0.524	0.00671	0.0692964	0.1932	-2.71	132.66
728806	N-ethylmaleimide-sensitive factor pseudogene 1	NSFP1	-0.524	0.0172	0.106559	0.2198	-2.38	933.41
349152	DPY19L2 pseudogene 2	DPY19L2P2	-0.523	0.000812	0.0271123	0.1563	-3.35	583.32
5961	peripherin 2	PRPH2	-0.522	0.00185	0.0381869	0.1677	-3.11	376.39
3358	5-hydroxytryptamine receptor 2C	HTR2C	-0.522	0.00495	0.0614694	0.1858	-2.81	290.43
2925	gastrin releasing peptide receptor	GRPR	-0.521	0.0107	0.0852319	0.2043	-2.55	31.06
145741	C2 calcium dependent domain containing 4A	C2CD4A	-0.52	0.00765	0.0734104	0.1949	-2.67	14.15
1490	cellular communication network factor 2	CCN2	-0.518	0.00304	0.0483687	0.1749	-2.96	1094.09
4645	myosin VB	MYO5B	-0.516	0.00022	0.0152906	0.1396	-3.69	453.82
283461	chromosome 12 open reading frame 40	C12orf40	-0.507	0.0121	0.0901343	0.2022	-2.51	57.83
246213	solute carrier family 17 member 8	SLC17A8	-0.502	0.00137	0.0332427	0.157	-3.2	83.21
3071	NCK associated protein 1 like	NCKAP1L	-0.502	0.00399	0.0551972	0.1742	-2.88	149.28
57495	NACHT and WD repeat domain containing 2	NWD2	-0.502	0.00867	0.0778442	0.1913	-2.62	1091.72
11024	leukocyte immunoglobulin like receptor A1	LILRA1	-0.502	0.0386	0.156615	0.2428	-2.07	33.53
83259	protocadherin 11 Y-linked	PCDH11Y	-0.502	0.0445	0.168282	0.2497	-2.01	1165.51
283420	C-type lectin domain containing 9A	CLEC9A	-0.499	0.0509	0.180141	0.2556	-1.95	13.09
6863	tachykinin precursor 1	TAC1	-0.498	0.000725	0.0257407	0.1474	-3.38	408.87
139189	diacylglycerol kinase kappa	DGKK	-0.498	0.0521	0.181975	0.2565	-1.94	11.5
5742	prostaglandin-endoperoxide synthase 1	PTGS1	-0.495	0.0128	0.0920429	0.1987	-2.49	130.51
105371672	uncharacterized LOC105371672	LOC105371672	-0.494	0.00175	0.0372186	0.1579	-3.13	475.39
4142	MAS1 proto-oncogene, G protein-coupled receptor	MAS1	-0.492	0.00707	0.0707422	0.1826	-2.69	826.47
11249	neurexophilin 2	NXPH2	-0.49	0.000671	0.0248128	0.144	-3.4	325.02
3117	major histocompatibility complex, class II, DQ alpha 1	HLA-DQA1	-0.49	0.15	0.325622	0.341	-1.44	26.92
109910380	RNA, 18S ribosomal N3	RNA18SN3	-0.487	0.102	0.258849	0.2974	-1.64	9077.94
594840	ZFAT antisense RNA 1	ZFAT-AS1	-0.485	0.0229	0.122313	0.2129	-2.28	15.65
105369543	uncharacterized LOC105369543	LOC105369543	-0.485	0.00725	0.0719411	0.1805	-2.69	339.23
26468	LIM homeobox 6	LHX6	-0.483	0.000293	0.0169711	0.1332	-3.62	1307.67
257313	urotensin 2B	UTS2B	-0.482	0.0544	0.185494	0.2506	-1.92	24.82
100287314	long intergenic non-protein coding RNA 941	LINC00941	-0.482	8.05e-07	0.002051	0.0977	-4.93	46.31
100008588	RNA, 18S ribosomal N5	RNA18SN5	-0.482	0.146	0.319876	0.3313	-1.45	39908.1
106631781	RNA, 18S ribosomal N1	RNA18SN1	-0.482	0.152	0.327671	0.3363	-1.43	24796.9
378707	RNA component of signal recognition particle 7SL3	RN7SL3	-0.48	0.0652	0.203684	0.2603	-1.84	215.75
1846	dual specificity phosphatase 4	DUSP4	-0.479	0.00476	0.0604168	0.1696	-2.82	744.24
57569	Rho GTPase activating protein 20	ARHGAP20	-0.477	0.00631	0.0677326	0.1745	-2.73	1452.68
109864273	RNA, 18S pre-ribosomal N4	RNA18SN4	-0.477	0.116	0.280128	0.3034	-1.57	10703.8
100652759	PRICKLE2 antisense RNA 1	PRICKLE2-AS1	-0.476	0.00271	0.0455525	0.1586	-3	614.07
3736	potassium voltage-gated channel subfamily A member 1	KCNA1	-0.476	0.0166	0.104456	0.1989	-2.4	2483.97
107986979	uncharacterized LOC107986979	LOC107986979	-0.476	0.0846	0.234458	0.2759	-1.72	24.73
83873	G protein-coupled receptor 61	GPR61	-0.475	0.00244	0.0435217	0.1568	-3.03	433.8
27328	protocadherin 11 X-linked	PCDH11X	-0.474	0.00249	0.0437364	0.1566	-3.02	903.23
23619	zinc finger imprinted 2	ZIM2	-0.474	0.00356	0.0525801	0.1625	-2.91	746.9
84570	collagen type XXV alpha 1 chain	COL25A1	-0.473	0.000176	0.0141211	0.1262	-3.75	188.27
389941	complement C1q like 3	C1QL3	-0.472	0.0324	0.144035	0.2208	-2.14	3737.3
56134	protocadherin alpha subfamily C, 2	PCDHAC2	-0.471	0.0096	0.0811282	0.182	-2.59	1347.39
101930105	zinc finger protein 839 pseudogene	FAM239A	-0.471	0.102	0.259193	0.2878	-1.64	145.78
26083	TBC1 domain family member 29, pseudogene	TBC1D29P	-0.469	0.0142	0.0968722	0.1911	-2.45	27.6
2742	glycine receptor alpha 2	GLRA2	-0.468	0.00246	0.0436031	0.1546	-3.03	350.1
83988	neurocalcin delta	NCALD	-0.467	0.000927	0.0285693	0.141	-3.31	7836.48
1129	cholinergic receptor muscarinic 2	CHRM2	-0.467	0.00766	0.0734486	0.175	-2.67	252.39
107985487		LOC107985487	-0.467	0.000371	0.0188532	0.1312	-3.56	52.9
22986	sortilin related VPS10 domain containing receptor 3	SORCS3	-0.466	0.000468	0.0204652	0.1331	-3.5	1477.69
28526	T cell receptor delta constant	TRDC	-0.466	0.0316	0.142301	0.217	-2.15	25.8
107984128	uncharacterized LOC107984128	LOC107984128	-0.465	0.0117	0.088538	0.1843	-2.52	82.16
3164	nuclear receptor subfamily 4 group A member 1	NR4A1	-0.464	0.0366	0.153137	0.222	-2.09	4121.23
3055	HCK proto-oncogene, Src family tyrosine kinase	HCK	-0.464	0.0379	0.155426	0.2235	-2.08	66.97
341359	synaptotagmin 10	SYT10	-0.462	0.0164	0.103806	0.1926	-2.4	163.86
101927193	CHL1 antisense RNA 1	CHL1-AS1	-0.461	0.00452	0.0590841	0.1624	-2.84	172.16
105378179	uncharacterized LOC105378179	LOC105378179	-0.461	0.0735	0.217204	0.2575	-1.79	481.36
134391	G protein-coupled receptor 151	GPR151	-0.46	0.0251	0.127437	0.2052	-2.24	10.83
27123	dickkopf WNT signaling pathway inhibitor 2	DKK2	-0.459	0.00356	0.0525914	0.1576	-2.91	86.2
30010	neurexophilin 1	NXPH1	-0.458	0.000427	0.0198099	0.1301	-3.52	975.85
115650	TNF receptor superfamily member 13C	TNFRSF13C	-0.458	0.0733	0.217046	0.2555	-1.79	11.54
389075	regulated endocrine specific protein 18	RESP18	-0.458	0.104	0.262282	0.2817	-1.63	32.14
105378941		LOC105378941	-0.458	0.0222	0.120393	0.2002	-2.29	42.29
9908	G3BP stress granule assembly factor 2	G3BP2	-0.457	0.00387	0.0545182	0.1582	-2.89	7518.82
10125	RAS guanyl releasing protein 1	RASGRP1	-0.455	0.00892	0.078826	0.1741	-2.61	2715.15
105377791	uncharacterized LOC105377791	LOC105377791	-0.455	0.00414	0.0561257	0.1587	-2.87	11.36
9162	diacylglycerol kinase iota	DGKI	-0.454	0.00149	0.0345612	0.1429	-3.18	2133.05
644168	dorsal root ganglia homeobox	DRGX	-0.454	0.0545	0.185523	0.2364	-1.92	43.72
55714	teneurin transmembrane protein 3	TENM3	-0.453	0.00377	0.054163	0.1564	-2.9	3378.54
139221	PWWP domain containing 3B	PWWP3B	-0.453	0.00619	0.0674127	0.1654	-2.74	517.04
203328	sushi domain containing 3	SUSD3	-0.453	0.064	0.201901	0.2444	-1.85	37.41
646627	LY6/PLAUR domain containing 8	LYPD8	-0.452	0.0102	0.0837716	0.176	-2.57	75.03
7903	ST8 alpha-N-acetyl-neuraminide alpha-2,8-sialyltransferase 4	ST8SIA4	-0.45	0.000171	0.014055	0.1196	-3.76	345.71
2255	fibroblast growth factor 10	FGF10	-0.45	0.0203	0.115367	0.1938	-2.32	77.16
101927406	long intergenic non-protein coding RNA 1821	LINC01821	-0.45	0.0275	0.132749	0.204	-2.2	33.52
3196	T cell leukemia homeobox 2	TLX2	-0.449	0.0518	0.181507	0.2307	-1.95	11.16
22987	synaptic vesicle glycoprotein 2C	SV2C	-0.448	0.0223	0.12071	0.1959	-2.28	769.14
105378576		LOC105378576	-0.448	0.0142	0.0968032	0.1827	-2.45	22.82
9201	doublecortin like kinase 1	DCLK1	-0.447	0.00677	0.0695395	0.165	-2.71	16315.7
11027	leukocyte immunoglobulin like receptor A2	LILRA2	-0.447	0.0707	0.212654	0.2476	-1.81	30.98
6332	sodium voltage-gated channel alpha subunit 7	SCN7A	-0.446	0.00405	0.0556374	0.1553	-2.87	141.83
105376039	uncharacterized LOC105376039	LOC105376039	-0.446	0.0261	0.12947	0.2006	-2.23	11.76
729681	uncharacterized LOC729681	LOC729681	-0.446	0.0126	0.0915979	0.1789	-2.5	10.25
63923	tenascin N	TNN	-0.445	0.0335	0.146673	0.2092	-2.13	56.5
79623	polypeptide N-acetylgalactosaminyltransferase 14	GALNT14	-0.444	0.00276	0.0458193	0.1484	-2.99	528.5
3903	leukocyte associated immunoglobulin like receptor 1	LAIR1	-0.443	0.0499	0.178614	0.2261	-1.96	103.76
3747	potassium voltage-gated channel subfamily C member 2	KCNC2	-0.442	0.00592	0.0660678	0.1606	-2.75	6208.89
27255	contactin 6	CNTN6	-0.442	0.0134	0.0947628	0.1789	-2.47	446.48
729025	solute carrier family 15 member 5	SLC15A5	-0.442	0.0777	0.223543	0.2503	-1.76	16.21
6696	secreted phosphoprotein 1	SPP1	-0.442	0.162	0.340613	0.3154	-1.4	3461.69
3790	potassium voltage-gated channel modifier subfamily S member 3	KCNS3	-0.441	0.000969	0.0288714	0.1335	-3.3	258.06
109864280	RNA, 18S ribosomal N2	RNA18SN2	-0.441	0.143	0.315885	0.3007	-1.47	4811.06
402117	von Willebrand factor C domain containing 2 like	VWC2L	-0.439	0.0025	0.0438716	0.1452	-3.02	333.85
85009	uncharacterized LOC85009	MGC16025	-0.439	0.0766	0.222084	0.2478	-1.77	24.81
114884	oxysterol binding protein like 10	OSBPL10	-0.438	0.00117	0.031198	0.1351	-3.25	681.55
23158	TBC1 domain family member 9	TBC1D9	-0.437	0.00653	0.0685652	0.1606	-2.72	3208.55
9829	DnaJ heat shock protein family (Hsp40) member C6	DNAJC6	-0.436	0.00808	0.0749128	0.1645	-2.65	18074.7
7425	VGF nerve growth factor inducible	VGF	-0.436	0.015	0.09926	0.1792	-2.43	6871.42
51289	relaxin family peptide receptor 3	RXFP3	-0.435	0.091	0.24368	0.2572	-1.69	15.18
349196	long intergenic non-protein coding RNA 965	LINC00965	-0.435	0.0201	0.114798	0.1872	-2.32	47.71
170261	zinc finger CCHC-type containing 12	ZCCHC12	-0.433	0.00573	0.065223	0.1567	-2.76	1822.26
9381	otoferlin	OTOF	-0.433	0.00591	0.0660514	0.1572	-2.75	272.56
401190	regulator of G protein signaling 7 binding protein	RGS7BP	-0.433	0.0329	0.145247	0.2032	-2.13	4077.58
101927735	TMEM132D antisense RNA 2	TMEM132D-AS2	-0.432	0.00561	0.0644632	0.1559	-2.77	39.16
54769	DIRAS family GTPase 2	DIRAS2	-0.432	0.00971	0.0816015	0.1669	-2.59	12751.1
105378897	SLC6A17 antisense RNA 1	SLC6A17-AS1	-0.432	0.0302	0.139008	0.1995	-2.17	607.45
121278	tryptophan hydroxylase 2	TPH2	-0.432	0.0492	0.177459	0.2197	-1.97	34.91
586	branched chain amino acid transaminase 1	BCAT1	-0.431	0.00034	0.0181168	0.1202	-3.58	1712.43
57709	solute carrier family 7 member 14	SLC7A14	-0.431	0.005	0.061514	0.1537	-2.81	4113.28
9615	guanine deaminase	GDA	-0.431	0.0222	0.120469	0.1883	-2.29	8403.88
105371308	uncharacterized LOC105371308	LOC105371308	-0.431	0.0238	0.124395	0.1904	-2.26	15.52
105375321	uncharacterized LOC105375321	LOC105375321	-0.431	0.0257	0.128967	0.1935	-2.23	38.94
5317	plakophilin 1	PKP1	-0.43	0.0314	0.14196	0.2	-2.15	170.88
115827	RAB3C, member RAS oncogene family	RAB3C	-0.43	0.0361	0.152156	0.2052	-2.1	11750.7
942	CD86 molecule	CD86	-0.43	0.158	0.335305	0.3043	-1.41	31.4
84959	ubiquitin associated and SH3 domain containing B	UBASH3B	-0.428	0.00165	0.0363132	0.1361	-3.15	540.55
100616393	microRNA 4657	MIR4657	-0.428	0.0134	0.0947255	0.1731	-2.47	44.59
100652739	RAET1E antisense RNA 1	RAET1E-AS1	-0.428	0.0295	0.137463	0.1967	-2.18	180.24
1122	CHM like Rab escort protein	CHML	-0.427	0.00672	0.0693248	0.1574	-2.71	1148.06
22797	transcription factor EC	TFEC	-0.427	0.0808	0.228627	0.2447	-1.75	21.92
375607	N-acetyltransferase 16 (putative)	NAT16	-0.426	0.000945	0.0286817	0.1288	-3.31	149.43
57586	synaptotagmin 13	SYT13	-0.424	0.0121	0.0901343	0.1689	-2.51	9692.99
101927126	general transcription factor IIi pseudogene 7	GTF2IP7	-0.424	0.0506	0.179602	0.2167	-1.95	10.95
389432	sterile alpha motif domain containing 5	SAMD5	-0.423	0.000387	0.0191088	0.1191	-3.55	216.03
56884	follistatin like 5	FSTL5	-0.423	0.0136	0.0954838	0.1714	-2.47	958.25
100189133	tRNA-Arg (anticodon TCT) 1-1	TRR-TCT1-1	-0.423	0.0155	0.100763	0.1747	-2.42	22.67
64092	SAM domain, SH3 domain and nuclear localization signals 1	SAMSN1	-0.423	0.0796	0.226974	0.2416	-1.75	34.73
9899	synaptic vesicle glycoprotein 2B	SV2B	-0.422	0.0161	0.102848	0.1754	-2.41	17593.3
9353	slit guidance ligand 2	SLIT2	-0.421	0.00528	0.0628346	0.1509	-2.79	2029.3
340533	neurite extension and migration factor	NEXMIF	-0.421	0.0058	0.0654897	0.1526	-2.76	1212.4
284611	EEIG family member 2	EEIG2	-0.421	0.00728	0.0720575	0.1568	-2.68	2526.67
105379191	uncharacterized CTB-1I21.1	CTB-1I21.1	-0.421	0.0845	0.23435	0.2443	-1.73	15.68
105374412	replaced by ID 105374413	LOC105374412	-0.421	0.0883	0.239737	0.2469	-1.7	34.19
56243	KIAA1217	KIAA1217	-0.42	0.000129	0.0128823	0.1098	-3.83	2541.55
170850	potassium voltage-gated channel modifier subfamily G member 3	KCNG3	-0.42	0.00984	0.0821211	0.1628	-2.58	163.33
101927728	long intergenic non-protein coding RNA 1476	LINC01476	-0.42	0.012	0.0898767	0.1674	-2.51	126.38
105373835	uncharacterized LOC105373835	LOC105373835	-0.42	0.00296	0.0475117	0.1413	-2.97	45.31
627	brain derived neurotrophic factor	BDNF	-0.419	0.00253	0.0442117	0.1389	-3.02	591.8
6869	tachykinin receptor 1	TACR1	-0.419	0.00578	0.0654897	0.1518	-2.76	226.78
64084	calsyntenin 2	CLSTN2	-0.419	0.0295	0.137463	0.1924	-2.18	14769.4
6424	secreted frizzled related protein 4	SFRP4	-0.419	0.0533	0.18376	0.2168	-1.93	60.54
107985879	long intergenic non-protein coding RNA 1833	LINC01833	-0.419	0.252	0.448533	0.3658	-1.14	17.11
105375630	uncharacterized LOC105375630	LOC105375630	-0.419	0.00355	0.0524207	0.1435	-2.92	88.09
449520	gametogenetin binding protein 1 (pseudogene)	GGNBP1	-0.418	0.0616	0.197468	0.2234	-1.87	28.81
105375825	uncharacterized LOC105375825	LOC105375825	-0.418	0.0276	0.132749	0.1899	-2.2	38.34
123036	tandem C2 domains, nuclear	TC2N	-0.417	0.0108	0.0856605	0.1638	-2.55	209.67
105378696	transmembrane protein 275	TMEM275	-0.417	0.0189	0.111448	0.1774	-2.35	55.97
5165	pyruvate dehydrogenase kinase 3	PDK3	-0.416	0.00604	0.0667101	0.1515	-2.75	4507.45
523	ATPase H+ transporting V1 subunit A	ATP6V1A	-0.416	0.00609	0.0668885	0.1518	-2.74	14003.3
22843	protein phosphatase, Mg2+/Mn2+ dependent 1E	PPM1E	-0.416	0.00905	0.0790017	0.1595	-2.61	2224.29
144501	keratin 80	KRT80	-0.416	0.0485	0.176159	0.2111	-1.97	15.42
2786	G protein subunit gamma 4	GNG4	-0.415	0.00115	0.03106	0.1276	-3.25	3008.77
5212	vitrin	VIT	-0.414	0.00204	0.0397163	0.1343	-3.08	72.8
55784	multiple C2 and transmembrane domain containing 2	MCTP2	-0.414	0.0249	0.12709	0.1847	-2.24	108.59
105370401	TRD antisense RNA 1	TRD-AS1	-0.413	0.0328	0.145055	0.1934	-2.13	9.38
646960	serine protease 56	PRSS56	-0.413	0.049	0.17701	0.21	-1.97	39.41
5800	protein tyrosine phosphatase receptor type O	PTPRO	-0.412	0.00414	0.0561582	0.1436	-2.87	1511.67
23547	leukocyte immunoglobulin like receptor A4	LILRA4	-0.412	0.139	0.311859	0.2788	-1.48	20.03
105374694	long intergenic non-protein coding RNA 2228	LINC02228	-0.412	0.00623	0.0674335	0.1508	-2.74	78.61
107984027	long intergenic non-protein coding RNA 2277	LINC02277	-0.412	0.194	0.38223	0.3168	-1.3	13.03
100419170	toll like receptor 2 pseudogene	LOC100419170	-0.412	0.176	0.360035	0.305	-1.35	16.98
23251	membrane integral NOTCH2 associated receptor 1	MINAR1	-0.411	0.000151	0.0135139	0.1085	-3.79	238.31
1261	cyclic nucleotide gated channel subunit alpha 3	CNGA3	-0.411	0.0178	0.108345	0.1732	-2.37	73.7
140766	ADAM metallopeptidase with thrombospondin type 1 motif 14	ADAMTS14	-0.411	0.129	0.298475	0.2711	-1.52	337.21
101927182	uncharacterized LOC101927182	LOC101927182	-0.411	0.025	0.127157	0.1835	-2.24	200.43
2899	glutamate ionotropic receptor kainate type subunit 3	GRIK3	-0.409	0.00244	0.0435217	0.135	-3.03	5370.06
10687	PNMA family member 2	PNMA2	-0.409	0.00649	0.068455	0.1501	-2.72	16201.8
144481	SOCS2 antisense RNA 1	SOCS2-AS1	-0.409	0.0096	0.081115	0.158	-2.59	22.14
3758	potassium inwardly rectifying channel subfamily J member 1	KCNJ1	-0.409	0.0373	0.154616	0.1964	-2.08	20.04
100506071	uncharacterized LOC100506071	LOC100506071	-0.408	0.000415	0.0196019	0.1156	-3.53	77.97
10863	ADAM metallopeptidase domain 28	ADAM28	-0.407	0.0586	0.192888	0.2153	-1.89	121.24
467	activating transcription factor 3	ATF3	-0.407	0.0855	0.235784	0.2367	-1.72	283.91
112267934	uncharacterized LOC112267934	LOC112267934	-0.407	0.00754	0.0730423	0.1523	-2.67	88.33
729830	FHF complex subunit HOOK interacting protein 1A	FHIP1A	-0.406	0.000377	0.0189272	0.1142	-3.56	151.01
779	calcium voltage-gated channel subunit alpha1 S	CACNA1S	-0.406	0.00695	0.0703297	0.1503	-2.7	88.59
7007	tectorin alpha	TECTA	-0.406	0.00775	0.0739336	0.1526	-2.66	368.26
5801	protein tyrosine phosphatase receptor type R	PTPRR	-0.406	0.0116	0.0879181	0.1608	-2.52	1258.19
107986675	uncharacterized LOC107986675	LOC107986675	-0.406	0.0755	0.220431	0.2282	-1.78	34.14
4856	cellular communication network factor 3	CCN3	-0.405	0.00455	0.0591606	0.1426	-2.84	1527.67
10231	regulator of calcineurin 2	RCAN2	-0.405	0.00665	0.06909	0.1493	-2.71	10648.5
102465252	microRNA 6506	MIR6506	-0.404	0.0155	0.100848	0.1668	-2.42	142.12
25769	solute carrier family 24 member 2	SLC24A2	-0.404	0.0167	0.104696	0.1689	-2.39	9122.36
1690	cochlin	COCH	-0.403	0.000246	0.0159412	0.1098	-3.67	168.33
28638	T cell receptor beta constant 2	TRBC2	-0.403	0.0009	0.0284228	0.1214	-3.32	120.27
55228	PNMA family member 8A	PNMA8A	-0.403	0.00352	0.0520697	0.1381	-2.92	9280.42
285513	GPRIN family member 3	GPRIN3	-0.403	0.00454	0.0591606	0.1422	-2.84	1014.81
79698	zinc finger matrin-type 4	ZMAT4	-0.403	0.0133	0.094175	0.1626	-2.48	1012.38
137735	actin binding Rho activating protein	ABRA	-0.403	0.0191	0.111885	0.1719	-2.34	20.03
10886	neuropeptide FF receptor 2	NPFFR2	-0.403	0.0567	0.189339	0.2114	-1.91	45.78
10842	protein phosphatase 1 regulatory subunit 17	PPP1R17	-0.403	0.0737	0.217584	0.2252	-1.79	126.68
101929532	uncharacterized LOC101929532	LOC101929532	-0.403	0.00408	0.0557524	0.1403	-2.87	19.55
105373027	uncharacterized LOC105373027	LOC105373027	-0.403	0.134	0.305092	0.2694	-1.5	74.14
107984894	uncharacterized LOC107984894	LOC107984894	-0.403	0.106	0.26534	0.2495	-1.62	38.11
5297	phosphatidylinositol 4-kinase alpha	PI4KA	-0.402	0.00913	0.0792023	0.1543	-2.61	42034.7
1816	dopamine receptor D5	DRD5	-0.402	0.0188	0.111068	0.1712	-2.35	529.62
132332	small integral membrane protein 43	SMIM43	-0.402	0.0322	0.143409	0.1878	-2.14	1926.3
107987228	uncharacterized LOC107987228	LOC107987228	-0.402	0.0135	0.0950817	0.1629	-2.47	136.91
105377922	long intergenic non-protein coding RNA 2836	LINC02836	-0.401	0.00461	0.0594219	0.1414	-2.83	25.74
60482	solute carrier family 5 member 7	SLC5A7	-0.401	0.321	0.519955	0.4041	-0.992	27.17
8128	ST8 alpha-N-acetyl-neuraminide alpha-2,8-sialyltransferase 2	ST8SIA2	-0.4	0.0179	0.108613	0.1687	-2.37	196.46
3381	integrin binding sialoprotein	IBSP	-0.4	0.124	0.291179	0.2598	-1.54	14.39
105370918	uncharacterized LOC105370918	LOC105370918	-0.4	0.0313	0.141493	0.1855	-2.15	11.8
105375876	uncharacterized LOC105375876	LOC105375876	-0.4	0.019	0.111592	0.1704	-2.35	16.95
4308	transient receptor potential cation channel subfamily M member 1	TRPM1	-0.4	0.297	0.494993	0.3828	-1.04	18.02
81539	solute carrier family 38 member 1	SLC38A1	-0.399	0.00455	0.0591606	0.1407	-2.84	6801.94
5048	platelet activating factor acetylhydrolase 1b regulatory subunit 1	PAFAH1B1	-0.399	0.00546	0.0638078	0.1437	-2.78	15606.4
3737	potassium voltage-gated channel subfamily A member 2	KCNA2	-0.399	0.0211	0.117721	0.173	-2.31	9004.83
101929473	uncharacterized LOC101929473	LOC101929473	-0.399	0.0324	0.144072	0.1867	-2.14	68.57
26047	contactin associated protein 2	CNTNAP2	-0.398	0.0127	0.0920424	0.1596	-2.49	7687.65
2212	Fc gamma receptor IIa	FCGR2A	-0.398	0.138	0.310253	0.2686	-1.48	77.24
56624	N-acylsphingosine amidohydrolase 2	ASAH2	-0.397	0.0117	0.0883742	0.1576	-2.52	194.95
219527	leucine rich repeat containing 55	LRRC55	-0.397	0.018	0.109013	0.1679	-2.37	592.21
7471	Wnt family member 1	WNT1	-0.397	0.0213	0.118024	0.1725	-2.3	71.14
2587	galanin receptor 1	GALR1	-0.397	0.0267	0.130692	0.1792	-2.22	162.39
728113	annexin A8 like 1	ANXA8L1	-0.397	0.0724	0.215452	0.2209	-1.8	10.94
84803	glycerol-3-phosphate acyltransferase 3	GPAT3	-0.396	0.0158	0.102097	0.1642	-2.41	69.33
102577424	long intergenic non-protein coding RNA 1574	LINC01574	-0.396	0.013	0.093048	0.1594	-2.48	21.16
255275	myeloid associated differentiation marker like 2	MYADML2	-0.395	0.00207	0.040212	0.1284	-3.08	333.39
3062	hypocretin receptor 2	HCRTR2	-0.395	0.0176	0.107822	0.1661	-2.37	35.89
2207	Fc epsilon receptor Ig	FCER1G	-0.395	0.0923	0.245858	0.2344	-1.68	49.82
105373780	proline-rich protein 18-like	LOC105373780	-0.395	0.000996	0.0291595	0.1199	-3.29	65.52
57282	solute carrier family 4 member 10	SLC4A10	-0.394	0.0138	0.0957816	0.1599	-2.46	5516.18
1830	desmoglein 3	DSG3	-0.394	0.145	0.318628	0.2699	-1.46	27.51
84197	protein O-mannose kinase	POMK	-0.393	0.000449	0.0201947	0.112	-3.51	351.9
3815	KIT proto-oncogene, receptor tyrosine kinase	KIT	-0.393	0.0109	0.0857887	0.1544	-2.55	1340.51
6860	synaptotagmin 4	SYT4	-0.393	0.0248	0.12673	0.1753	-2.24	6426.22
5740	prostaglandin I2 synthase	PTGIS	-0.393	0.0252	0.127603	0.1754	-2.24	241.74
1961	early growth response 4	EGR4	-0.393	0.0695	0.210697	0.2166	-1.82	486.6
5475	protein phosphatase with EF-hand domain 1	PPEF1	-0.392	0.0109	0.0859221	0.1538	-2.54	319.07
375567	von Willebrand factor C domain containing 2	VWC2	-0.391	0.00171	0.0368502	0.1247	-3.14	848.02
26035	glucuronic acid epimerase	GLCE	-0.391	0.00272	0.0455969	0.1304	-3	1077.39
55231	coiled-coil domain containing 87	CCDC87	-0.391	0.00438	0.0579915	0.1372	-2.85	48.45
107985190	long intergenic non-protein coding RNA 1779	LINC01779	-0.391	0.0788	0.225391	0.2225	-1.76	9.35
10178	teneurin transmembrane protein 1	TENM1	-0.389	0.00132	0.0326552	0.1212	-3.21	1421.85
9581	prolyl endopeptidase like	PREPL	-0.389	0.00965	0.0813725	0.1504	-2.59	14586.9
526	ATPase H+ transporting V1 subunit B2	ATP6V1B2	-0.389	0.0114	0.0870691	0.1536	-2.53	15025.3
109729164	long intergenic non-protein coding RNA 2234	LINC02234	-0.389	0.0288	0.135649	0.1781	-2.19	13.14
645644	uncharacterized LOC645644	FLJ42627	-0.388	0.000184	0.0141211	0.1038	-3.74	1363.22
643037	chromosome 11 open reading frame 97	C11orf97	-0.388	0.00652	0.0685596	0.1428	-2.72	19.34
10752	cell adhesion molecule L1 like	CHL1	-0.388	0.0121	0.0902495	0.1549	-2.51	11052
2557	gamma-aminobutyric acid type A receptor subunit alpha4	GABRA4	-0.388	0.0143	0.0972221	0.1585	-2.45	3017.52
81621	Kazal type serine peptidase inhibitor domain 1	KAZALD1	-0.388	0.0185	0.110381	0.1647	-2.35	116.27
3776	potassium two pore domain channel subfamily K member 2	KCNK2	-0.387	0.00478	0.060613	0.1371	-2.82	431.92
7852	C-X-C motif chemokine receptor 4	CXCR4	-0.387	0.0587	0.192912	0.2045	-1.89	97.96
105371709	uncharacterized LOC105371709	LOC105371709	-0.387	0.0306	0.14011	0.1788	-2.16	233.2
1536	cytochrome b-245 beta chain	CYBB	-0.387	0.164	0.343066	0.2776	-1.39	162.09
9185	RALBP1 associated Eps domain containing 2	REPS2	-0.386	0.00894	0.0788734	0.1476	-2.61	5000.41
101928646	BMAL2 antisense RNA 1	BMAL2-AS1	-0.386	0.0108	0.0854613	0.1514	-2.55	14.66
6092	roundabout guidance receptor 2	ROBO2	-0.386	0.0204	0.11571	0.1666	-2.32	3364.09
728798	FERM and PDZ domain containing 2B, pseudogene	FRMPD2B	-0.386	0.0507	0.179737	0.1974	-1.95	971.91
57084	solute carrier family 17 member 6	SLC17A6	-0.386	0.058	0.191615	0.2035	-1.9	266.79
150935	uncharacterized LOC150935	LOC150935	-0.386	0.0412	0.161906	0.1893	-2.04	10.92
148930	kinocilin	KNCN	-0.385	0.0079	0.0743397	0.1448	-2.66	121.85
9890	phospholipid phosphatase related 4	PLPPR4	-0.385	0.012	0.0896529	0.1533	-2.51	5824.82
3887	keratin 81	KRT81	-0.385	0.015	0.099353	0.1581	-2.43	62.55
4133	microtubule associated protein 2	MAP2	-0.385	0.0248	0.126654	0.1714	-2.24	69394
101060524	D(1B) dopamine receptor-like	LOC101060524	-0.385	0.0735	0.217292	0.2153	-1.79	45.39
102724058	uncharacterized LOC102724058	LOC102724058	-0.385	0.0499	0.178737	0.1964	-1.96	115.94
3852	keratin 5	KRT5	-0.385	0.154	0.330666	0.27	-1.42	112.04
57182	ankyrin repeat domain containing 50	ANKRD50	-0.384	0.00261	0.0447804	0.1277	-3.01	1499.95
8618	calcium dependent secretion activator	CADPS	-0.384	0.00629	0.0676286	0.1405	-2.73	8023.44
653145	annexin A8	ANXA8	-0.384	0.014	0.0964164	0.1562	-2.46	16.8
2214	Fc gamma receptor IIIa	FCGR3A	-0.384	0.293	0.491621	0.3653	-1.05	117.59
817	calcium/calmodulin dependent protein kinase II delta	CAMK2D	-0.383	0.00188	0.0384415	0.1234	-3.11	4382.64
55086	RPA1 related single stranded DNA binding protein, X-linked	RADX	-0.383	0.00256	0.0442579	0.1269	-3.02	345.84
253782	ceramide synthase 6	CERS6	-0.383	0.01	0.0828332	0.1488	-2.58	3054.58
102465841	microRNA 7855	MIR7855	-0.383	0.0131	0.0935904	0.1543	-2.48	17.96
402096	ANAPC1 pseudogene 6	ANAPC1P6	-0.383	0.021	0.117254	0.1661	-2.31	14.55
4753	neural EGFL like 2	NELL2	-0.383	0.0305	0.140061	0.1768	-2.16	12855.8
5649	reelin	RELN	-0.383	0.0977	0.252935	0.231	-1.66	2541.73
100505996	SOX1 overlapping transcript	SOX1-OT	-0.382	0.00621	0.0674127	0.1395	-2.74	332.62
3788	potassium voltage-gated channel modifier subfamily S member 2	KCNS2	-0.382	0.0351	0.14987	0.1814	-2.11	658.56
2119	ETS variant transcription factor 5	ETV5	-0.381	0.0021	0.0403772	0.1241	-3.08	2804.11
1012	cadherin 13	CDH13	-0.381	0.00898	0.0788921	0.146	-2.61	5881.27
57526	protocadherin 19	PCDH19	-0.381	0.0235	0.12392	0.1681	-2.27	2242.61
5788	protein tyrosine phosphatase receptor type C	PTPRC	-0.381	0.048	0.175016	0.1926	-1.98	132.58
105377399	uncharacterized LOC105377399	LOC105377399	-0.381	0.0183	0.109685	0.1613	-2.36	13.28
107987330	family with sequence similarity 239 member C	FAM239C	-0.381	0.48	0.663666	0.5394	-0.707	49.52
8808	interleukin 1 receptor like 2	IL1RL2	-0.38	9.19e-05	0.0112587	0.0971	-3.91	164.48
81606	LBH regulator of WNT signaling pathway	LBH	-0.38	0.00209	0.0402665	0.1235	-3.08	1141.22
387856	coiled-coil domain containing 184	CCDC184	-0.38	0.00393	0.0548103	0.1317	-2.88	2185.36
81553	CYFIP related Rac1 interactor A	CYRIA	-0.38	0.00792	0.0743871	0.143	-2.66	6258.33
100288346	NCAM1 antisense RNA1	NCAM1-AS1	-0.379	0.00511	0.0620652	0.1355	-2.8	1105.89
11248	neurexophilin 3	NXPH3	-0.379	0.00897	0.0788921	0.1449	-2.61	1967.19
161931	adenosine deaminase domain containing 2	ADAD2	-0.379	0.0782	0.224301	0.2154	-1.76	142.34
92211	cadherin related family member 1	CDHR1	-0.378	0.00425	0.0568519	0.1324	-2.86	2184.2
10874	neuromedin U	NMU	-0.378	0.0268	0.13091	0.1706	-2.22	15.05
643529	long intergenic non-protein coding RNA 865	LINC00865	-0.378	0.041	0.161648	0.1849	-2.04	190.6
57613	family with sequence similarity 234 member B	FAM234B	-0.377	0.00149	0.0345612	0.1187	-3.18	3908.01
3587	interleukin 10 receptor subunit alpha	IL10RA	-0.377	0.00242	0.0433518	0.1243	-3.03	137.26
100313887	microRNA 2277	MIR2277	-0.377	0.00292	0.0473578	0.1266	-2.98	17.41
114928	G protein-coupled receptor associated sorting protein 2	GPRASP2	-0.377	0.00758	0.073226	0.141	-2.67	1780.26
63908	NSF attachment protein beta	NAPB	-0.377	0.0245	0.125837	0.1677	-2.25	23859.8
54734	RAB39A, member RAS oncogene family	RAB39A	-0.377	0.0409	0.161357	0.1846	-2.04	71.71
1818	dopamine receptor D5 pseudogene 2	DRD5P2	-0.377	0.0807	0.228391	0.2156	-1.75	45.88
91977	myozenin 3	MYOZ3	-0.376	0.00451	0.0590651	0.1322	-2.84	201.18
121551	ankyrin repeat and BTB domain containing 3	ABTB3	-0.376	0.00994	0.0824858	0.146	-2.58	1006.23
285175	unc-80 homolog, NALCN channel complex subunit	UNC80	-0.376	0.0103	0.0839819	0.1467	-2.57	8826.84
101928147	chromosome 21 open reading frame 140	C21orf140	-0.376	0.0123	0.0906111	0.1499	-2.5	58.65
345557	phosphatidylinositol specific phospholipase C X domain containing 3	PLCXD3	-0.376	0.0144	0.0977411	0.1538	-2.45	1866.03
6545	solute carrier family 7 member 4	SLC7A4	-0.376	0.0144	0.0976404	0.1537	-2.45	840.37
23312	Dmx like 2	DMXL2	-0.376	0.0216	0.11914	0.1639	-2.3	5905.54
219833	KCNJ5 antisense RNA 1	KCNJ5-AS1	-0.376	0.0242	0.124848	0.167	-2.25	96.41
345079	sosondowah ankyrin repeat domain family member B	SOWAHB	-0.376	0.0413	0.162179	0.1841	-2.04	802.5
101927590	long intergenic non-protein coding RNA 1166	LINC01166	-0.376	0.0113	0.0869964	0.1486	-2.53	110.85
83483	plasmalemma vesicle associated protein	PLVAP	-0.376	0.203	0.393421	0.2957	-1.27	48.24
100131244	ankyrin repeat domain 63	ANKRD63	-0.375	0.0193	0.112533	0.1603	-2.34	423.18
112268201		LOC112268201	-0.375	0.143	0.315885	0.2561	-1.47	15.18
81706	protein phosphatase 1 regulatory inhibitor subunit 14C	PPP1R14C	-0.374	0.0022	0.041402	0.1221	-3.06	482.98
105373328	uncharacterized LOC105373328	LOC105373328	-0.374	0.0377	0.155142	0.1801	-2.08	122.36
57146	lipid droplet assembly factor 1	LDAF1	-0.373	0.00395	0.0549165	0.1294	-2.88	272.72
9229	DLG associated protein 1	DLGAP1	-0.373	0.0136	0.0954196	0.1514	-2.47	12997.7
26280	interleukin 1 receptor accessory protein like 2	IL1RAPL2	-0.373	0.0337	0.14692	0.1757	-2.12	118.96
102723451	family with sequence similarity 243 member B	LOC102723451	-0.373	0.0116	0.0879928	0.1479	-2.52	58.08
112268426		LOC112268426	-0.373	0.172	0.35484	0.2729	-1.37	14.09
80231	TLR adaptor interacting with endolysosomal SLC15A4	TASL	-0.373	0.242	0.438221	0.3183	-1.17	12.08
56097	protocadherin gamma subfamily C, 5	PCDHGC5	-0.372	0.0179	0.10878	0.157	-2.37	4893.44
57512	G protein-coupled receptor 158	GPR158	-0.372	0.0192	0.112368	0.1588	-2.34	3179.53
102723692	uncharacterized LOC102723692	LOC102723692	-0.372	0.0114	0.087311	0.147	-2.53	88.48
654780	splicing factor proline/glutamine-rich	LOC654780	-0.372	0.0732	0.216768	0.2076	-1.79	66.58
100288866	NGFR antisense RNA 1	NGFR-AS1	-0.372	0.261	0.458343	0.3311	-1.12	21.32
24145	pannexin 1	PANX1	-0.371	0.00761	0.0732782	0.1392	-2.67	1419.08
105369302	uncharacterized LOC105369302	LOC105369302	-0.371	0.0689	0.209916	0.2037	-1.82	251.23
105371307	uncharacterized LOC105371307	LOC105371307	-0.371	0.112	0.273705	0.2332	-1.59	28.25
80055	post-GPI attachment to proteins inositol deacylase 1	PGAP1	-0.37	0.00387	0.0545182	0.1283	-2.89	2622.89
22876	inositol polyphosphate-5-phosphatase F	INPP5F	-0.37	0.00518	0.062244	0.1322	-2.8	9059.45
206358	solute carrier family 36 member 1	SLC36A1	-0.37	0.00668	0.0691223	0.1363	-2.71	1562.12
259217	heat shock protein family A (Hsp70) member 12A	HSPA12A	-0.37	0.00798	0.0746859	0.1393	-2.65	9175.14
105371708	long intergenic non-protein coding RNA 1992	LINC01992	-0.37	0.118	0.282512	0.2364	-1.56	20.42
101929510	uncharacterized LOC101929510	LOC101929510	-0.37	0.048	0.175055	0.1873	-1.98	13.04
100506343	INKA2 antisense RNA 1	INKA2-AS1	-0.369	0.00643	0.0680712	0.1353	-2.73	51.25
283514	siah E3 ubiquitin protein ligase family member 3	SIAH3	-0.369	0.0084	0.0764014	0.1401	-2.64	364.68
23089	paternally expressed 10	PEG10	-0.369	0.0161	0.102849	0.1532	-2.41	11636.7
100616142	microRNA 4458	MIR4458	-0.369	0.0625	0.199103	0.1981	-1.86	10.49
4826	neuronatin	NNAT	-0.368	0.00376	0.054136	0.1269	-2.9	5266.27
2334	ALF transcription elongation factor 2	AFF2	-0.368	0.0223	0.120675	0.1609	-2.29	1240.84
9508	ADAM metallopeptidase with thrombospondin type 1 motif 3	ADAMTS3	-0.368	0.0256	0.128619	0.165	-2.23	296.86
105379561	uncharacterized LOC105379561	LOC105379561	-0.368	0.127	0.295679	0.2413	-1.53	9.96
107985795		LOC107985795	-0.368	0.0434	0.166045	0.1821	-2.02	27.31
56135	protocadherin alpha subfamily C, 1	PCDHAC1	-0.367	0.00176	0.0373304	0.1172	-3.13	327.36
6515	solute carrier family 2 member 3	SLC2A3	-0.367	0.00177	0.0374651	0.1173	-3.13	4383.56
10314	LanC like glutathione S-transferase 1	LANCL1	-0.367	0.00654	0.0685652	0.1348	-2.72	8920.4
2915	glutamate metabotropic receptor 5	GRM5	-0.367	0.0171	0.106166	0.154	-2.39	3138.82
266743	neuronal PAS domain protein 4	NPAS4	-0.367	0.303	0.500632	0.356	-1.03	368.63
259232	sodium leak channel, non-selective	NALCN	-0.366	0.00139	0.0334457	0.1145	-3.2	2499.33
105616981	B3GALT1 antisense RNA 1	B3GALT1-AS1	-0.366	0.0063	0.0676982	0.1339	-2.73	21.51
55074	oxidation resistance 1	OXR1	-0.366	0.0198	0.114076	0.157	-2.33	8523.35
2556	gamma-aminobutyric acid type A receptor subunit alpha3	GABRA3	-0.366	0.0237	0.124298	0.1619	-2.26	3213.69
2567	gamma-aminobutyric acid type A receptor subunit gamma3	GABRG3	-0.365	0.000568	0.0227706	0.1059	-3.45	1266.2
286	ankyrin 1	ANK1	-0.365	0.00478	0.060613	0.1294	-2.82	1731.19
1795	dedicator of cytokinesis 3	DOCK3	-0.365	0.00671	0.0692964	0.1347	-2.71	11183.2
5581	protein kinase C epsilon	PRKCE	-0.365	0.00707	0.0707422	0.1357	-2.69	8502.98
114798	SLIT and NTRK like family member 1	SLITRK1	-0.365	0.00955	0.0809171	0.1407	-2.59	2507.77
478	ATPase Na+/K+ transporting subunit alpha 3	ATP1A3	-0.365	0.0261	0.129522	0.1639	-2.22	95955.5
441046	GUSB pseudogene 5	GUSBP5	-0.365	0.0264	0.130317	0.1642	-2.22	38.59
59350	relaxin family peptide receptor 1	RXFP1	-0.365	0.0358	0.151375	0.174	-2.1	1146.28
399947	chromosome 11 open reading frame 87	C11orf87	-0.365	0.04	0.159556	0.1779	-2.05	4519
348980	hyperpolarization activated cyclic nucleotide gated potassium channel 1	HCN1	-0.364	0.0193	0.112533	0.1556	-2.34	3226.44
999	cadherin 1	CDH1	-0.364	0.101	0.258441	0.2223	-1.64	102.66
653653	adaptor related protein complex 1 subunit sigma 2 pseudogene	LOC653653	-0.364	0.0182	0.10934	0.1542	-2.36	39
59339	pleckstrin homology domain containing A2	PLEKHA2	-0.362	0.00063	0.024042	0.1058	-3.42	2018.32
55711	fatty acyl-CoA reductase 2	FAR2	-0.362	0.00247	0.0436959	0.1197	-3.03	973.05
85453	TSPY like 5	TSPYL5	-0.362	0.00753	0.0730234	0.1356	-2.67	1978.68
5874	RAB27B, member RAS oncogene family	RAB27B	-0.362	0.0336	0.146755	0.1704	-2.12	2300.45
109729137	MEF2C antisense RNA 2	MEF2C-AS2	-0.362	0.0529	0.18301	0.1869	-1.94	406.54
552	arginine vasopressin receptor 1A	AVPR1A	-0.362	0.0603	0.195237	0.1927	-1.88	57.78
777	calcium voltage-gated channel subunit alpha1 E	CACNA1E	-0.361	0.00511	0.0620652	0.1288	-2.8	7261.81
2558	gamma-aminobutyric acid type A receptor subunit alpha5	GABRA5	-0.361	0.00817	0.0752638	0.1366	-2.65	5249.04
9033	polycystin 2 like 1, transient receptor potential cation channel	PKD2L1	-0.361	0.0348	0.149204	0.171	-2.11	122.22
164633	calcium binding protein 7	CABP7	-0.36	0.00295	0.0474125	0.1212	-2.97	731.19
9926	lysophosphatidylglycerol acyltransferase 1	LPGAT1	-0.36	0.00404	0.0556369	0.1252	-2.87	3528.71
151963	Mab-21 domain containing 2	MB21D2	-0.36	0.0103	0.0839819	0.1405	-2.56	345.07
100500872	microRNA 3911	MIR3911	-0.36	0.0206	0.116208	0.1556	-2.31	1371.15
57687	vesicle amine transport 1 like	VAT1L	-0.36	0.0297	0.137753	0.1655	-2.17	4648.16
113219454	microRNA 12121	MIR12121	-0.36	0.0593	0.193742	0.191	-1.89	14.97
157693	family with sequence similarity 87 member A	FAM87A	-0.36	0.0697	0.211079	0.1982	-1.81	32.4
286186	long intergenic non-protein coding RNA 1299	LINC01299	-0.36	0.172	0.354579	0.2635	-1.37	56.78
57482	capping protein inhibiting regulator of actin dynamics	CRACD	-0.359	0.000638	0.0241472	0.1051	-3.41	1273.26
23167	EFR3 homolog A	EFR3A	-0.359	0.0081	0.0750105	0.1356	-2.65	5656.02
8707	beta-1,3-galactosyltransferase 2	B3GALT2	-0.359	0.00842	0.0765022	0.1361	-2.63	1900.71
100533184	ARHGAP19-SLIT1 readthrough (NMD candidate)	ARHGAP19-SLIT1	-0.359	0.0369	0.153623	0.1722	-2.09	237.88
148753	family with sequence similarity 163 member A	FAM163A	-0.359	0.0415	0.162354	0.1764	-2.04	484.02
23544	seizure related 6 homolog like	SEZ6L	-0.358	0.0112	0.0866532	0.1414	-2.54	11848.3
3479	insulin like growth factor 1	IGF1	-0.358	0.0113	0.0869964	0.1413	-2.53	690.06
9215	LARGE xylosyl- and glucuronyltransferase 1	LARGE1	-0.358	0.014	0.0963549	0.1457	-2.46	6966
1213	clathrin heavy chain	CLTC	-0.358	0.0144	0.0976766	0.1462	-2.45	22519.4
105379181	uncharacterized CTB-49A3.2	CTB-49A3.2	-0.358	0.0264	0.130227	0.1612	-2.22	109.3
4905	N-ethylmaleimide sensitive factor, vesicle fusing ATPase	NSF	-0.358	0.0339	0.14717	0.1686	-2.12	19853.9
175	aspartylglucosaminidase	AGA	-0.357	0.00211	0.0404248	0.1162	-3.07	255.08
157	G protein-coupled receptor kinase 3	GRK3	-0.357	0.00382	0.0542757	0.1235	-2.89	4153.58
55530	SV2 related protein	SVOP	-0.357	0.0166	0.104559	0.1491	-2.4	8112.68
401097	chromosome 3 open reading frame 80	C3orf80	-0.357	0.0183	0.109685	0.1513	-2.36	1212.96
2847	melanin concentrating hormone receptor 1	MCHR1	-0.357	0.0227	0.121972	0.1569	-2.28	1031.05
57718	protein phosphatase 4 regulatory subunit 4	PPP4R4	-0.357	0.0446	0.168479	0.1777	-2.01	1568.31
503569	RGMB antisense RNA 1	RGMB-AS1	-0.357	0.0523	0.182104	0.1839	-1.94	42.21
11314	CD300a molecule	CD300A	-0.357	0.132	0.302083	0.2369	-1.51	45.48
728084	long intergenic non-protein coding RNA 2458	LINC02458	-0.357	0.0205	0.115784	0.1541	-2.32	134.8
7532	tyrosine 3-monooxygenase/tryptophan 5-monooxygenase activation protein gamma	YWHAG	-0.356	0.00646	0.0682798	0.1307	-2.72	32271.2
64112	modulator of apoptosis 1	MOAP1	-0.356	0.0143	0.0974897	0.1456	-2.45	8265.99
491	ATPase plasma membrane Ca2+ transporting 2	ATP2B2	-0.356	0.04	0.159582	0.1734	-2.05	24148.3
114801	transmembrane protein 200A	TMEM200A	-0.356	0.0692	0.210127	0.1959	-1.82	275.06
100873941	OPA1 antisense RNA 1	OPA1-AS1	-0.355	0.00804	0.0748952	0.134	-2.65	28.99
2922	gastrin releasing peptide	GRP	-0.355	0.103	0.261096	0.2181	-1.63	30.64
5573	protein kinase cAMP-dependent type I regulatory subunit alpha	PRKAR1A	-0.354	0.000648	0.0242937	0.1039	-3.41	8002.83
3775	potassium two pore domain channel subfamily K member 1	KCNK1	-0.354	0.00494	0.0614694	0.126	-2.81	2441.66
643853	transmembrane protein with metallophosphoesterase domain	TMPPE	-0.354	0.00495	0.0614694	0.1259	-2.81	151.63
112609	melanocortin 2 receptor accessory protein 2	MRAP2	-0.354	0.0109	0.0858262	0.1389	-2.55	1040.67
112267960	KCNQ5 divergent transcript	KCNQ5-DT	-0.354	0.0268	0.13094	0.1598	-2.21	173.56
387914	shisa family member 2	SHISA2	-0.354	0.0738	0.217587	0.198	-1.79	62.9
100131532	uncharacterized LOC100131532	LOC100131532	-0.354	0.0137	0.0956788	0.1437	-2.46	24.97
26052	dynamin 3	DNM3	-0.353	0.0038	0.0542008	0.1221	-2.89	7941.65
54331	G protein subunit gamma 2	GNG2	-0.353	0.0107	0.0850404	0.1382	-2.55	5355.89
57181	solute carrier family 39 member 10	SLC39A10	-0.353	0.0156	0.10158	0.1458	-2.42	6869.01
8867	synaptojanin 1	SYNJ1	-0.353	0.0246	0.125948	0.157	-2.25	9580.01
389197	chromosome 4 open reading frame 50	C4orf50	-0.352	0.00365	0.0530464	0.1209	-2.91	2676.92
79827	CXADR like membrane protein	CLMP	-0.352	0.00502	0.061514	0.1254	-2.81	280.5
1268	cannabinoid receptor 1	CNR1	-0.352	0.0155	0.100783	0.1452	-2.42	4201.43
439996	interferon induced protein with tetratricopeptide repeats 1B	IFIT1B	-0.352	0.032	0.143241	0.1643	-2.14	9.42
343702	XK related 7	XKR7	-0.351	0.011	0.0859346	0.1381	-2.54	753.39
412	steroid sulfatase	STS	-0.351	0.0225	0.121103	0.1536	-2.28	1735.44
6334	sodium voltage-gated channel alpha subunit 8	SCN8A	-0.351	0.0269	0.131305	0.1586	-2.21	8874.43
134829	clavesin 2	CLVS2	-0.351	0.0272	0.131941	0.1591	-2.21	3445.4
57626	kelch like family member 1	KLHL1	-0.351	0.0474	0.173659	0.1769	-1.98	152.9
105377684	uncharacterized LOC105377684	LOC105377684	-0.351	0.0655	0.204305	0.1908	-1.84	14.85
144423	glycosyltransferase 1 domain containing 1	GLT1D1	-0.35	0.00679	0.0695447	0.1292	-2.71	2035.1
2890	glutamate ionotropic receptor AMPA type subunit 1	GRIA1	-0.35	0.00749	0.0728352	0.1307	-2.67	8109.94
10079	ATPase phospholipid transporting 9A (putative)	ATP9A	-0.35	0.00887	0.0785691	0.1338	-2.62	24798.4
10888	G protein-coupled receptor 83	GPR83	-0.35	0.0419	0.162915	0.1719	-2.03	517.89
647309	geminin coiled-coil domain containing	GMNC	-0.35	0.0811	0.229004	0.2005	-1.74	17.23
9688	nucleoporin 93	NUP93	-0.349	0.000355	0.0184664	0.0977	-3.57	1836.41
30811	hormonally up-regulated Neu-associated kinase	HUNK	-0.349	0.00183	0.0379994	0.1121	-3.12	717.3
56255	thioredoxin related transmembrane protein 4	TMX4	-0.349	0.00555	0.0641449	0.1257	-2.77	5252.37
27439	transmembrane protein 121B	TMEM121B	-0.349	0.00732	0.0723749	0.1301	-2.68	1822.83
11023	ventral anterior homeobox 1	VAX1	-0.349	0.00748	0.0728205	0.1307	-2.67	68.03
9472	A-kinase anchoring protein 6	AKAP6	-0.349	0.00907	0.0790495	0.1337	-2.61	10251.2
100847046	microRNA 5010	MIR5010	-0.349	0.00999	0.0827161	0.1354	-2.58	642.39
2983	guanylate cyclase 1 soluble subunit beta 1	GUCY1B1	-0.349	0.0142	0.0968722	0.1423	-2.45	5534.03
5178	paternally expressed 3	PEG3	-0.349	0.0143	0.0972221	0.1424	-2.45	18698.8
84553	failed axon connections homolog, metaxin like GST domain containing	FAXC	-0.349	0.0239	0.124457	0.1546	-2.26	2317.02
9746	calsyntenin 3	CLSTN3	-0.349	0.0331	0.145744	0.164	-2.13	33542.8
118427	olfactomedin 3	OLFM3	-0.349	0.0407	0.160866	0.1706	-2.05	2067.21
107985118	uncharacterized LOC107985118	LOC107985118	-0.349	0.0879	0.239227	0.2047	-1.71	10.57
283349	Ras association domain family member 3	RASSF3	-0.348	0.00211	0.0404072	0.1132	-3.07	453.73
5291	phosphatidylinositol-4,5-bisphosphate 3-kinase catalytic subunit beta	PIK3CB	-0.348	0.00973	0.0817277	0.1348	-2.59	2845.13
1183	chloride voltage-gated channel 4	CLCN4	-0.348	0.0184	0.110022	0.1474	-2.36	6473.53
347902	adhesion molecule with Ig like domain 2	AMIGO2	-0.348	0.0313	0.141646	0.1616	-2.15	334.64
2740	glucagon like peptide 1 receptor	GLP1R	-0.348	0.0715	0.214093	0.1931	-1.8	58.78
201617	long intergenic non-protein coding RNA 870	LINC00870	-0.348	0.0642	0.202288	0.1882	-1.85	27.23
26960	neurobeachin	NBEA	-0.347	0.0184	0.110076	0.1474	-2.36	6193.47
4591	tripartite motif containing 37	TRIM37	-0.347	0.0193	0.112533	0.1483	-2.34	5764.04
388323	glycolipid transfer protein domain containing 2	GLTPD2	-0.347	0.0276	0.132914	0.1577	-2.2	229.14
374946	dorsal inhibitory axon guidance protein	DRAXIN	-0.347	0.0416	0.162521	0.1705	-2.04	246.88
105373311	uncharacterized LOC105373311	LOC105373311	-0.347	0.0101	0.0830824	0.1349	-2.57	41.43
51617	neuronal vesicle trafficking associated 2	NSG2	-0.346	0.00824	0.0757555	0.131	-2.64	11499.2
81533	integrin alpha FG-GAP repeat containing 1	ITFG1	-0.346	0.0111	0.0859811	0.1361	-2.54	4038.91
23531	monocyte to macrophage differentiation associated	MMD	-0.346	0.0161	0.102944	0.1437	-2.41	3823.15
148281	synaptotagmin 6	SYT6	-0.345	0.0115	0.0874212	0.1364	-2.53	382.34
101927102	ITFG1 antisense RNA 1	ITFG1-AS1	-0.345	0.0129	0.092402	0.1387	-2.49	325.47
11215	A-kinase anchoring protein 11	AKAP11	-0.345	0.0173	0.107025	0.145	-2.38	12203.2
137970	unc-5 netrin receptor D	UNC5D	-0.345	0.0187	0.110856	0.1467	-2.35	1439.35
7504	X-linked Kx blood group antigen, Kell and VPS13A binding protein	XK	-0.345	0.0195	0.11302	0.1479	-2.34	809.11
2044	EPH receptor A5	EPHA5	-0.345	0.0569	0.189572	0.1811	-1.9	1773.25
6404	selectin P ligand	SELPLG	-0.345	0.255	0.451655	0.3031	-1.14	309.25
23270	TSPY like 4	TSPYL4	-0.344	0.00355	0.0525088	0.1181	-2.92	10898.3
3074	hexosaminidase subunit beta	HEXB	-0.344	0.0259	0.12921	0.1545	-2.23	1404.48
51046	ST8 alpha-N-acetyl-neuraminide alpha-2,8-sialyltransferase 3	ST8SIA3	-0.344	0.0308	0.140481	0.1595	-2.16	7007.13
80309	SPHK1 interactor, AKAP domain containing	SPHKAP	-0.344	0.0402	0.159916	0.1676	-2.05	3024.55
100505746	ITGB2 antisense RNA 1	ITGB2-AS1	-0.344	0.0952	0.249884	0.2062	-1.67	42.74
728192	long intergenic non-protein coding RNA 460	LINC00460	-0.344	0.00989	0.0823543	0.1335	-2.58	66.14
59277	netrin 4	NTN4	-0.343	0.00244	0.0435435	0.1131	-3.03	1240.01
2209	Fc gamma receptor Ia	FCGR1A	-0.343	0.177	0.360494	0.2538	-1.35	46.02
4131	microtubule associated protein 1B	MAP1B	-0.342	0.00987	0.0822531	0.1327	-2.58	177642
257240	kelch like family member 34	KLHL34	-0.342	0.0123	0.0907307	0.1365	-2.5	250.85
2744	glutaminase	GLS	-0.342	0.0125	0.0915066	0.1368	-2.5	12128.5
101928174	GJD2 divergent transcript	GJD2-DT	-0.342	0.0134	0.0947628	0.1383	-2.47	52.37
340665	cytochrome P450 family 26 subfamily C member 1	CYP26C1	-0.342	0.0348	0.149335	0.1618	-2.11	18.98
8507	ectodermal-neural cortex 1	ENC1	-0.342	0.0413	0.162087	0.1677	-2.04	40177.1
27012	potassium voltage-gated channel modifier subfamily V member 1	KCNV1	-0.342	0.0614	0.197023	0.1829	-1.87	2852.3
27042	UTP25 small subunit processome component	UTP25	-0.341	0.00115	0.0309261	0.1049	-3.25	830.26
9721	G protein regulated inducer of neurite outgrowth 2	GPRIN2	-0.341	0.00924	0.0797399	0.1309	-2.6	164.91
1780	dynein cytoplasmic 1 intermediate chain 1	DYNC1I1	-0.341	0.0259	0.129116	0.153	-2.23	6293.67
642597	A-kinase anchor inhibitor 1	AKAIN1	-0.341	0.0662	0.205521	0.1858	-1.84	39.11
105374966	uncharacterized LOC105374966	LOC105374966	-0.341	0.0526	0.182674	0.1759	-1.94	259.23
401478	uncharacterized LOC401478	LOC401478	-0.341	0.0382	0.155808	0.1645	-2.07	47.67
9087	thymosin beta 4 Y-linked	TMSB4Y	-0.341	0.307	0.505192	0.3342	-1.02	50.15
7225	transient receptor potential cation channel subfamily C member 6	TRPC6	-0.34	0.00434	0.0576128	0.1191	-2.85	110.85
9891	NUAK family kinase 1	NUAK1	-0.34	0.013	0.0930545	0.1371	-2.48	10034.5
3376	isoleucyl-tRNA synthetase 1	IARS1	-0.34	0.0152	0.0999705	0.1399	-2.43	4096.29
347686	small nucleolar RNA, C/D box 64	SNORD64	-0.34	0.0152	0.0999783	0.1398	-2.43	73.64
2554	gamma-aminobutyric acid type A receptor subunit alpha1	GABRA1	-0.34	0.0379	0.155436	0.1638	-2.08	9220.03
105374869	uncharacterized LOC105374869	LOC105374869	-0.34	0.431	0.624025	0.4319	-0.787	413.22
285766	uncharacterized LOC285766	LOC285766	-0.34	0.405	0.599797	0.408	-0.833	54.44
83851	synaptotagmin 16	SYT16	-0.339	0.0297	0.137927	0.156	-2.17	5173.73
80310	platelet derived growth factor D	PDGFD	-0.339	0.0461	0.171045	0.1702	-1.99	93.78
956	ectonucleoside triphosphate diphosphohydrolase 3	ENTPD3	-0.338	0.0046	0.0594219	0.1193	-2.83	808.14
673	B-Raf proto-oncogene, serine/threonine kinase	BRAF	-0.338	0.00582	0.0655371	0.1226	-2.76	2880.36
1114	chromogranin B	CHGB	-0.338	0.0146	0.0981222	0.1384	-2.44	6580.34
100189265	tRNA-Ile (anticodon TAT) 2-1	TRI-TAT2-1	-0.338	0.0162	0.103027	0.1406	-2.4	14.06
4978	opioid binding protein/cell adhesion molecule like	OPCML	-0.338	0.0216	0.118861	0.1471	-2.3	10543.4
4884	neuronal pentraxin 1	NPTX1	-0.338	0.0275	0.132749	0.1534	-2.2	30596.6
100873975	CNTN4 antisense RNA 1	CNTN4-AS1	-0.337	0.00563	0.0645915	0.1216	-2.77	119.48
51132	ring finger protein, LIM domain interacting	RLIM	-0.337	0.00738	0.0726881	0.1259	-2.68	4682.69
127933	U2AF homology motif kinase 1	UHMK1	-0.337	0.0146	0.0981488	0.1382	-2.44	6640.45
105374937	uncharacterized LOC105374937	LOC105374937	-0.337	0.129	0.297648	0.2216	-1.52	35.66
9734	histone deacetylase 9	HDAC9	-0.336	0.00866	0.0778283	0.128	-2.63	1689.64
114821	SCAN domain containing 3	SCAND3	-0.336	0.0113	0.0869395	0.1327	-2.53	143.46
26045	leucine rich repeat transmembrane neuronal 2	LRRTM2	-0.336	0.0126	0.0917401	0.1346	-2.49	2659.8
528	ATPase H+ transporting V1 subunit C1	ATP6V1C1	-0.336	0.0159	0.102169	0.1391	-2.41	8929.93
91149	RAPGEF4 antisense RNA 1	RAPGEF4-AS1	-0.336	0.0295	0.137463	0.1544	-2.18	98.43
58477	SRP receptor subunit beta	SRPRB	-0.336	0.031	0.141071	0.1557	-2.16	10679.3
151647	TAFA chemokine like family member 4	TAFA4	-0.336	0.0352	0.150076	0.1593	-2.11	63.44
6323	sodium voltage-gated channel alpha subunit 1	SCN1A	-0.336	0.0568	0.1894	0.1762	-1.91	3204.76
27293	sphingomyelin phosphodiesterase acid like 3B	SMPDL3B	-0.336	0.0607	0.195828	0.1793	-1.88	45.39
143162	FERM and PDZ domain containing 2	FRMPD2	-0.336	0.0631	0.200053	0.1809	-1.86	875.54
340205	triggering receptor expressed on myeloid cells like 1	TREML1	-0.336	0.115	0.278262	0.2129	-1.58	19.44
6518	solute carrier family 2 member 5	SLC2A5	-0.336	0.13	0.299362	0.2219	-1.51	257.86
105376388	long intergenic non-protein coding RNA 2642	LINC02642	-0.336	0.206	0.396339	0.2651	-1.27	15.74
1142	cholinergic receptor nicotinic beta 3 subunit	CHRNB3	-0.335	0.0138	0.0958344	0.1359	-2.46	35
6812	syntaxin binding protein 1	STXBP1	-0.335	0.0227	0.122004	0.1472	-2.28	53138.1
3097	HIVEP zinc finger 2	HIVEP2	-0.335	0.0244	0.125543	0.1488	-2.25	8161.65
3708	inositol 1,4,5-trisphosphate receptor type 1	ITPR1	-0.335	0.0336	0.146673	0.1575	-2.12	11883.7
105375988	uncharacterized LOC105375988	LOC105375988	-0.335	0.0331	0.145744	0.157	-2.13	89.06
1325	cortistatin	CORT	-0.334	0.0132	0.0940234	0.1349	-2.48	122.92
59353	transmembrane protein 35A	TMEM35A	-0.334	0.0137	0.0956788	0.1356	-2.46	1859.39
3751	potassium voltage-gated channel subfamily D member 2	KCND2	-0.334	0.0179	0.108569	0.1411	-2.37	1501.17
85465	selenoprotein I	SELENOI	-0.334	0.0228	0.122117	0.1468	-2.28	3010.48
4233	MET proto-oncogene, receptor tyrosine kinase	MET	-0.334	0.0448	0.168786	0.1664	-2.01	250.55
388939	photoreceptor cilium actin regulator	PCARE	-0.334	0.0509	0.180141	0.1711	-1.95	32
26298	ETS homologous factor	EHF	-0.334	0.0533	0.183764	0.1729	-1.93	72.98
266812	nucleosome assembly protein 1 like 5	NAP1L5	-0.333	0.00486	0.0610053	0.1184	-2.82	4111.82
5066	peptidylglycine alpha-amidating monooxygenase	PAM	-0.333	0.00627	0.0675738	0.122	-2.73	4727.99
442117	polypeptide N-acetylgalactosaminyltransferase like 6	GALNTL6	-0.333	0.00842	0.0765022	0.1263	-2.63	258.26
781	calcium voltage-gated channel auxiliary subunit alpha2delta 1	CACNA2D1	-0.333	0.0114	0.0869964	0.1317	-2.53	3925.02
5774	protein tyrosine phosphatase non-receptor type 3	PTPN3	-0.333	0.0302	0.139008	0.1535	-2.17	859.39
105374845	CHMP3 and RNF103 antisense RNA 1	CHMP3-AS1	-0.333	0.0423	0.163727	0.1641	-2.03	12.94
3321	immunoglobulin superfamily member 3	IGSF3	-0.333	0.0423	0.163754	0.164	-2.03	936.65
104326188	long intergenic non-protein coding RNA 1202	LINC01202	-0.333	0.0686	0.20948	0.1826	-1.82	69.58
400841	long intergenic non-protein coding RNA 1597	LINC01597	-0.333	0.124	0.290977	0.2164	-1.54	76.38
9103	Fc gamma receptor IIc (gene/pseudogene)	FCGR2C	-0.333	0.147	0.32139	0.2296	-1.45	22.13
107986321	NPY2R antisense RNA 1	NPY2R-AS1	-0.333	0.194	0.382554	0.2566	-1.3	18.54
10129	FRY microtubule binding protein	FRY	-0.332	0.0067	0.069206	0.1223	-2.71	4900.4
23335	WD repeat domain 7	WDR7	-0.332	0.017	0.106013	0.1393	-2.39	5660.51
26033	attractin like 1	ATRNL1	-0.332	0.032	0.143241	0.1549	-2.14	7528.86
5979	ret proto-oncogene	RET	-0.332	0.041	0.161648	0.1625	-2.04	634.58
101060187	uncharacterized LOC101060187	LOC101060187	-0.332	0.0538	0.184322	0.1724	-1.93	130.42
102725231	uncharacterized LOC102725231	LOC102725231	-0.332	0.0836	0.233105	0.1919	-1.73	14.4
105373289	LOC105373289	LOC105373289	-0.332	0.0144	0.0976012	0.1355	-2.45	106.82
112268140	loricrin-like	LOC112268140	-0.332	0.0286	0.135135	0.1517	-2.19	93.2
401442	uncharacterized LOC401442	LOC401442	-0.332	0.0129	0.0926047	0.1333	-2.49	60.46
23138	NEDD4 binding protein 3	N4BP3	-0.331	0.00704	0.0706591	0.1228	-2.7	1214.41
3312	heat shock protein family A (Hsp70) member 8	HSPA8	-0.331	0.00767	0.0734568	0.1242	-2.67	40945.9
2932	glycogen synthase kinase 3 beta	GSK3B	-0.331	0.00899	0.0788921	0.1266	-2.61	4410.49
113146	AHNAK nucleoprotein 2	AHNAK2	-0.331	0.0134	0.0947622	0.1339	-2.47	4801.01
25758	KIAA1549 like	KIAA1549L	-0.331	0.0383	0.155932	0.1599	-2.07	10875.2
6769	SH3 and cysteine rich domain	STAC	-0.331	0.0525	0.182466	0.1705	-1.94	35.45
22884	WD repeat domain 37	WDR37	-0.33	0.00428	0.056965	0.1156	-2.86	2476.2
56267	kynurenine aminotransferase 3	KYAT3	-0.33	0.0137	0.0955333	0.1337	-2.47	453.28
83593	Ras association domain family member 5	RASSF5	-0.33	0.0149	0.0990761	0.1357	-2.43	790.57
10396	ATPase phospholipid transporting 8A1	ATP8A1	-0.33	0.0158	0.101998	0.1368	-2.41	8701.85
23072	HECT, C2 and WW domain containing E3 ubiquitin protein ligase 1	HECW1	-0.33	0.0239	0.12465	0.146	-2.26	3335.9
359809	paternally expressed 13	PEG13	-0.33	0.0375	0.154963	0.1586	-2.08	2160.7
84684	INSM transcriptional repressor 2	INSM2	-0.33	0.0402	0.159893	0.1607	-2.05	125.46
102723817	CNIH3 antisense RNA 2	CNIH3-AS2	-0.33	0.0429	0.164856	0.1631	-2.03	283.2
100287902	LGALS8 antisense RNA 1	LGALS8-AS1	-0.33	0.0505	0.179494	0.1687	-1.96	8.89
3872	keratin 17	KRT17	-0.33	0.0714	0.213942	0.183	-1.8	372.9
79986	zinc finger protein 702, pseudogene	ZNF702P	-0.33	0.0743	0.218587	0.1852	-1.78	176.35
400680	long intergenic non-protein coding RNA 664	LINC00664	-0.33	0.0633	0.200505	0.1777	-1.86	34.55
105374852	uncharacterized LOC105374852	LOC105374852	-0.33	0.0712	0.213535	0.183	-1.8	25.69
9980	DOP1 leucine zipper like protein B	DOP1B	-0.329	0.00497	0.061514	0.1171	-2.81	1459.62
144195	solute carrier family 2 member 14	SLC2A14	-0.329	0.00649	0.068455	0.1208	-2.72	547.66
5567	protein kinase cAMP-activated catalytic subunit beta	PRKACB	-0.329	0.0138	0.0958207	0.1336	-2.46	14097
90161	heparan sulfate 6-O-sulfotransferase 2	HS6ST2	-0.329	0.027	0.131538	0.1489	-2.21	653.48
6854	synapsin II	SYN2	-0.329	0.0276	0.132914	0.1495	-2.2	21871.8
126755	leucine rich repeat containing 38	LRRC38	-0.329	0.0983	0.253809	0.1992	-1.65	47.67
101927286	long intergenic non-protein coding RNA 2254	LINC02254	-0.329	0.0479	0.174957	0.1666	-1.98	19.05
101928718	uncharacterized LOC101928718	LOC101928718	-0.329	0.00391	0.0547181	0.114	-2.89	58.41
130813	chromosome 2 open reading frame 50	C2orf50	-0.328	0.00109	0.0302159	0.1005	-3.27	452.7
692094	microseminoprotein, prostate associated	MSMP	-0.328	0.00557	0.0642371	0.1183	-2.77	337.65
134353	LSM11, U7 small nuclear RNA associated	LSM11	-0.328	0.0139	0.0962563	0.1332	-2.46	1240.03
22895	rabphilin 3A	RPH3A	-0.328	0.023	0.12264	0.1442	-2.27	18223.2
1446	casein alpha s1	CSN1S1	-0.328	0.23	0.424471	0.2734	-1.2	19.62
440021	keratin associated protein 5-2	KRTAP5-2	-0.327	0.00826	0.0759243	0.1237	-2.64	229.07
2835	G protein-coupled receptor 12	GPR12	-0.327	0.0105	0.0846976	0.128	-2.56	857.98
6585	slit guidance ligand 1	SLIT1	-0.327	0.012	0.0896622	0.1303	-2.51	16730.4
948	CD36 molecule	CD36	-0.327	0.0289	0.135765	0.1495	-2.19	37.6
3172	hepatocyte nuclear factor 4 alpha	HNF4A	-0.327	0.0449	0.168996	0.163	-2.01	55.83
105369668	uncharacterized LOC105369668	LOC105369668	-0.327	0.0266	0.130612	0.1476	-2.22	82.05
799	calcitonin receptor	CALCR	-0.327	0.218	0.410776	0.2654	-1.23	13.53
7857	secretogranin II	SCG2	-0.326	0.00325	0.0503452	0.1109	-2.94	5852.31
100506895	lncRNA upregulator of antiviral response interferon signaling	LUARIS	-0.326	0.0247	0.126313	0.1453	-2.25	134.32
100507421	transmembrane protein 178B	TMEM178B	-0.326	0.0274	0.132513	0.148	-2.21	5094.17
105378499	HSPA12A antisense RNA 1	HSPA12A-AS1	-0.326	0.0359	0.151419	0.1553	-2.1	1059.56
1960	early growth response 3	EGR3	-0.326	0.0567	0.189339	0.1711	-1.91	3602.19
6588	sarcolipin	SLN	-0.326	0.131	0.300828	0.2157	-1.51	212.5
105377068	long intergenic non-protein coding RNA 2009	LINC02009	-0.326	0.0876	0.238688	0.1908	-1.71	75.55
105374455	uncharacterized LOC105374455	LOC105374455	-0.326	0.173	0.356281	0.2391	-1.36	15.46
107986291		LOC107986291	-0.326	0.0564	0.188939	0.1707	-1.91	66.86
3111	major histocompatibility complex, class II, DO alpha	HLA-DOA	-0.326	0.159	0.337465	0.2318	-1.41	74.32
10859	leukocyte immunoglobulin like receptor B1	LILRB1	-0.326	0.234	0.429405	0.2741	-1.19	111.32
10686	claudin 16	CLDN16	-0.325	0.00764	0.0733498	0.1216	-2.67	24.5
238	ALK receptor tyrosine kinase	ALK	-0.325	0.00821	0.0755318	0.1231	-2.64	574.93
401548	sorting nexin family member 30	SNX30	-0.325	0.00872	0.0778598	0.124	-2.62	2501.52
80823	G protein-coupled receptor associated sorting protein family member 3	GPRASP3	-0.325	0.0114	0.087311	0.1284	-2.53	791.59
388662	solute carrier family 6 member 17	SLC6A17	-0.325	0.0181	0.109311	0.1374	-2.36	29110.3
147381	cerebellin 2 precursor	CBLN2	-0.325	0.0203	0.115367	0.1399	-2.32	3146.8
23057	nicotinamide nucleotide adenylyltransferase 2	NMNAT2	-0.325	0.0402	0.159885	0.1582	-2.05	13247.8
93986	forkhead box P2	FOXP2	-0.325	0.0492	0.17734	0.165	-1.97	415.17
25849	prostate androgen-regulated mucin-like protein 1	PARM1	-0.325	0.0554	0.187386	0.1695	-1.92	4189.34
101929305	uncharacterized LOC101929305	LOC101929305	-0.325	0.0289	0.135901	0.1488	-2.18	16.42
6547	solute carrier family 8 member A3	SLC8A3	-0.324	0.00521	0.0624889	0.1159	-2.79	1094
647121	embigin pseudogene 1	EMBP1	-0.324	0.00871	0.0778598	0.1235	-2.62	45.91
10484	SEC23 homolog A, COPII coat complex component	SEC23A	-0.324	0.00898	0.0788921	0.124	-2.61	2305.58
92255	LMBR1 domain containing 2	LMBRD2	-0.324	0.0178	0.108345	0.1367	-2.37	3268.42
53344	cysteine rich hydrophobic domain 1	CHIC1	-0.324	0.0212	0.117807	0.1405	-2.3	1685.59
100847012	microRNA 5004	MIR5004	-0.324	0.0282	0.134495	0.1475	-2.19	288.36
23228	phospholipase C like 2	PLCL2	-0.324	0.0289	0.13579	0.1482	-2.18	1363.68
2566	gamma-aminobutyric acid type A receptor subunit gamma2	GABRG2	-0.324	0.0409	0.161357	0.1585	-2.04	7374.74
1630	DCC netrin 1 receptor	DCC	-0.324	0.0412	0.161906	0.1587	-2.04	742.06
7259	TSPY like 1	TSPYL1	-0.323	0.00422	0.0565771	0.1129	-2.86	14284.8
8760	CDP-diacylglycerol synthase 2	CDS2	-0.323	0.00428	0.056965	0.1132	-2.86	9926.32
57520	HECT, C2 and WW domain containing E3 ubiquitin protein ligase 2	HECW2	-0.323	0.00499	0.061514	0.115	-2.81	2056.77
27253	protocadherin 17	PCDH17	-0.323	0.00526	0.0627183	0.1158	-2.79	13161
100286979	ANAPC1 pseudogene 1	ANAPC1P1	-0.323	0.0125	0.0915066	0.1292	-2.5	33.64
10447	FAM3 metabolism regulating signaling molecule C	FAM3C	-0.323	0.0152	0.100033	0.133	-2.43	3287.22
23349	PHD finger protein 24	PHF24	-0.323	0.0188	0.111334	0.1376	-2.35	16561.7
100129083	SIGLEC10 antisense RNA 1	SIGLEC10-AS1	-0.323	0.0504	0.17944	0.1652	-1.96	28.12
84109	pyroglutamylated RFamide peptide receptor	QRFPR	-0.323	0.0677	0.207951	0.1767	-1.83	26.69
23007	phospholipase C eta 1	PLCH1	-0.323	0.0768	0.222296	0.1825	-1.77	1828.64
101927911	uncharacterized LOC101927911	LOC101927911	-0.323	0.0276	0.132914	0.1468	-2.2	326.41
157753	transmembrane protein 74	TMEM74	-0.322	0.00501	0.061514	0.1149	-2.81	477.67
2066	erb-b2 receptor tyrosine kinase 4	ERBB4	-0.322	0.00772	0.0737984	0.1208	-2.66	3510.35
2026	enolase 2	ENO2	-0.322	0.02	0.114451	0.1384	-2.33	38429.4
80034	cysteine and serine rich nuclear protein 3	CSRNP3	-0.322	0.0257	0.128802	0.1442	-2.23	4784.51
105374971	uncharacterized LOC105374971	LOC105374971	-0.322	0.054	0.184617	0.167	-1.93	18.68
57460	protein phosphatase, Mg2+/Mn2+ dependent 1H	PPM1H	-0.321	0.00321	0.0499385	0.109	-2.95	3591.8
26031	oxysterol binding protein like 3	OSBPL3	-0.321	0.0038	0.0542008	0.1109	-2.89	1122.25
92691	transmembrane protein 169	TMEM169	-0.321	0.00635	0.0678436	0.1178	-2.73	373.04
4033	inositol 1,4,5-triphosphate receptor associated 2	IRAG2	-0.321	0.0092	0.0794725	0.1234	-2.6	350.02
100422921	microRNA 3149	MIR3149	-0.321	0.0678	0.208023	0.1759	-1.83	9.98
105377727	uncharacterized LOC105377727	LOC105377727	-0.321	0.0261	0.129526	0.1442	-2.22	27.49
1737	dihydrolipoamide S-acetyltransferase	DLAT	-0.32	0.00534	0.0632816	0.1148	-2.79	1211.31
26289	adenylate kinase 5	AK5	-0.32	0.0116	0.088004	0.1269	-2.52	14147
9804	translocase of outer mitochondrial membrane 20	TOMM20	-0.32	0.0122	0.0903803	0.1276	-2.51	10615.3
54842	major facilitator superfamily domain containing 6	MFSD6	-0.32	0.0218	0.119772	0.1394	-2.29	6472.73
1272	contactin 1	CNTN1	-0.32	0.0284	0.134802	0.1458	-2.19	15524.8
29953	thyrotropin releasing hormone degrading enzyme	TRHDE	-0.32	0.089	0.240846	0.1879	-1.7	1572.94
105376139	uncharacterized LOC105376139	LOC105376139	-0.32	0.159	0.337432	0.2275	-1.41	11.7
1880	G protein-coupled receptor 183	GPR183	-0.32	0.187	0.373821	0.2425	-1.32	34.91
91807	myosin light chain kinase 3	MYLK3	-0.319	0.0619	0.198053	0.1711	-1.87	150.15
26034	interaction protein for cytohesin exchange factors 1	IPCEF1	-0.319	0.0655	0.204305	0.1731	-1.84	4380.56
390616	ankyrin repeat domain 34C	ANKRD34C	-0.319	0.0952	0.249884	0.191	-1.67	357.76
84432	prokineticin 1	PROK1	-0.319	0.115	0.278228	0.2024	-1.58	9.59
80274	signal peptide, CUB domain and EGF like domain containing 1	SCUBE1	-0.319	0.116	0.280304	0.2032	-1.57	316.13
102724943	splicing factor 3A subunit 2	LOC102724943	-0.319	0.00276	0.0457657	0.1065	-2.99	100.78
85403	ELL associated factor 1	EAF1	-0.318	0.00268	0.0453527	0.1058	-3	1672.73
345778	metaxin 3	MTX3	-0.318	0.00419	0.056471	0.1109	-2.86	1448.46
57683	zinc finger DBF-type containing 2	ZDBF2	-0.318	0.00975	0.0817576	0.1232	-2.58	1772.99
6248	regulator of solute carriers 1	RSC1A1	-0.318	0.0179	0.108586	0.1341	-2.37	203.93
134957	syntaxin binding protein 5	STXBP5	-0.318	0.022	0.120316	0.1388	-2.29	4321.13
387804	V-set and transmembrane domain containing 5	VSTM5	-0.318	0.0382	0.155805	0.1534	-2.07	329.67
4644	myosin VA	MYO5A	-0.318	0.0414	0.16221	0.156	-2.04	25082.7
3290	hydroxysteroid 11-beta dehydrogenase 1	HSD11B1	-0.318	0.0706	0.212536	0.1761	-1.81	110.15
105373010	long intergenic non-protein coding RNA 1643	LINC01643	-0.318	0.0571	0.189799	0.167	-1.9	147.53
101927019	uncharacterized LOC101927019	LOC101927019	-0.318	0.0254	0.128206	0.1423	-2.23	145.44
105379215		LOC105379215	-0.318	0.0666	0.206117	0.1735	-1.83	22.75
92703	transmembrane protein 183A	TMEM183A	-0.317	0.00231	0.0427258	0.1042	-3.05	2315.5
56675	nuclear receptor interacting protein 3	NRIP3	-0.317	0.00638	0.0679538	0.1162	-2.73	2901.1
26268	F-box protein 9	FBXO9	-0.317	0.00849	0.0769221	0.1205	-2.63	3177.45
23122	cytoplasmic linker associated protein 2	CLASP2	-0.317	0.009	0.0788921	0.1214	-2.61	10461
57611	immunoglobulin superfamily containing leucine rich repeat 2	ISLR2	-0.317	0.0613	0.196866	0.1696	-1.87	3472.57
441178	long intergenic non-protein coding RNA 2487	LINC02487	-0.317	0.157	0.333856	0.2235	-1.42	16.72
100132249	uncharacterized LOC100132249	LOC100132249	-0.317	0.00973	0.0817277	0.1227	-2.59	375.82
101928658	uncharacterized LOC101928658	LOC101928658	-0.317	0.0364	0.152744	0.1514	-2.09	23.48
105378570		LOC105378570	-0.317	0.199	0.38885	0.2469	-1.29	10.12
100852407	CARS1 antisense RNA 1	CARS1-AS1	-0.316	0.00116	0.0310883	0.0974	-3.25	163.28
84226	chromosome 2 open reading frame 16	C2orf16	-0.316	0.00462	0.0594494	0.1116	-2.83	64.35
23208	synaptotagmin 11	SYT11	-0.316	0.00555	0.064141	0.1138	-2.77	25736.8
55102	autophagy related 2B	ATG2B	-0.316	0.00609	0.0668885	0.1153	-2.74	2376.18
64420	sushi domain containing 1	SUSD1	-0.316	0.00722	0.0717738	0.1176	-2.69	543.5
53616	ADAM metallopeptidase domain 22	ADAM22	-0.316	0.0254	0.128131	0.1413	-2.24	4607.66
223075	ITPR interacting domain containing 1	ITPRID1	-0.316	0.0572	0.190124	0.1662	-1.9	32.51
7054	tyrosine hydroxylase	TH	-0.316	0.0629	0.199699	0.1698	-1.86	102.83
105376030	uncharacterized LOC105376030	LOC105376030	-0.316	0.0468	0.172392	0.159	-1.99	36.62
105378589	uncharacterized LOC105378589	LOC105378589	-0.316	0.0403	0.160085	0.154	-2.05	108.33
9358	integrin subunit beta like 1	ITGBL1	-0.315	0.01	0.0828507	0.1224	-2.57	228.69
11095	ADAM metallopeptidase with thrombospondin type 1 motif 8	ADAMTS8	-0.315	0.0148	0.0987769	0.1292	-2.44	1246.26
2918	glutamate metabotropic receptor 8	GRM8	-0.315	0.0153	0.100498	0.1301	-2.42	383.32
26281	fibroblast growth factor 20	FGF20	-0.315	0.0242	0.124848	0.1399	-2.25	15.67
285704	repulsive guidance molecule BMP co-receptor b	RGMB	-0.315	0.0245	0.125837	0.1402	-2.25	3164.17
168667	BMP binding endothelial regulator	BMPER	-0.315	0.0485	0.176315	0.1595	-1.97	958.9
646324	long intergenic non-protein coding RNA 607	LINC00607	-0.315	0.0705	0.212381	0.174	-1.81	21.1
105377921	uncharacterized LOC105377921	LOC105377921	-0.315	0.0214	0.118486	0.1368	-2.3	118.04
644554	uncharacterized LOC644554	LOC644554	-0.315	0.0145	0.0978301	0.1288	-2.45	59.6
9752	protocadherin alpha 9	PCDHA9	-0.314	0.00313	0.0492887	0.1061	-2.96	283.19
100874007	VIPR1 antisense RNA 1	VIPR1-AS1	-0.314	0.0123	0.0906111	0.1254	-2.5	63.81
1428	crystallin mu	CRYM	-0.314	0.0245	0.125837	0.1395	-2.25	3271.02
2182	acyl-CoA synthetase long chain family member 4	ACSL4	-0.314	0.0246	0.125899	0.1399	-2.25	3451.21
166752	FRAS1 related extracellular matrix 3	FREM3	-0.314	0.328	0.527402	0.3213	-0.977	577.9
3052	holocytochrome c synthase	HCCS	-0.313	0.00512	0.0620652	0.1119	-2.8	526.24
26011	teneurin transmembrane protein 4	TENM4	-0.313	0.00655	0.0685652	0.115	-2.72	2633.7
2805	glutamic-oxaloacetic transaminase 1	GOT1	-0.313	0.0238	0.124424	0.1384	-2.26	9705.89
101927699	SYT15 antisense RNA 1	SYT15-AS1	-0.313	0.0406	0.160603	0.1531	-2.05	631.07
117154	dachshund family transcription factor 2	DACH2	-0.313	0.0642	0.202248	0.1694	-1.85	910.58
139201	mitogen-activated protein kinase kinase 4 pseudogene 1	MAP2K4P1	-0.313	0.103	0.260044	0.1915	-1.63	48.19
57156	transmembrane protein 63C	TMEM63C	-0.312	0.00567	0.0647942	0.1128	-2.77	2866.12
8455	attractin	ATRN	-0.312	0.0107	0.0852931	0.1221	-2.55	5745.86
101928216		LOC101928216	-0.312	0.0119	0.0894584	0.1241	-2.51	754.64
107985303	IQ motif and SEC7 domain-containing protein 2-like	LOC107985303	-0.312	0.0277	0.133054	0.1419	-2.2	143.97
10154	plexin C1	PLXNC1	-0.311	0.00927	0.0799087	0.1194	-2.6	1342.07
55800	sodium voltage-gated channel beta subunit 3	SCN3B	-0.311	0.0195	0.113045	0.1332	-2.34	19903
57628	dipeptidyl peptidase like 10	DPP10	-0.311	0.022	0.120186	0.1358	-2.29	2354.05
120939	transmembrane protein 52B	TMEM52B	-0.311	0.146	0.320582	0.2139	-1.45	70.89
139818	dedicator of cytokinesis 11	DOCK11	-0.31	0.00111	0.030355	0.0951	-3.26	182.89
84679	solute carrier family 9 member A7	SLC9A7	-0.31	0.00779	0.0740933	0.1164	-2.66	2618.36
51761	ATPase phospholipid transporting 8A2	ATP8A2	-0.31	0.014	0.0963549	0.1262	-2.46	5319.83
10846	phosphodiesterase 10A	PDE10A	-0.31	0.014	0.0963549	0.1262	-2.46	509.45
347731	leucine rich repeat transmembrane neuronal 3	LRRTM3	-0.31	0.0171	0.106325	0.13	-2.38	1307.62
6865	tachykinin receptor 2	TACR2	-0.31	0.0236	0.12423	0.1369	-2.26	199.19
85352	shisa like 1	SHISAL1	-0.31	0.0256	0.128613	0.1387	-2.23	8979.59
54627	microtubule associated protein 10	MAP10	-0.31	0.027	0.131454	0.1402	-2.21	182.02
55117	solute carrier family 6 member 15	SLC6A15	-0.31	0.0292	0.136597	0.1421	-2.18	2252.22
3756	potassium voltage-gated channel subfamily H member 1	KCNH1	-0.31	0.0645	0.202742	0.1675	-1.85	2333.44
100302138	microRNA 1292	MIR1292	-0.31	0.0742	0.218351	0.1736	-1.79	8.72
10223	glycoprotein A33	GPA33	-0.31	0.0815	0.229387	0.1782	-1.74	12.94
3889	keratin 83	KRT83	-0.31	0.0938	0.247864	0.1849	-1.68	33.31
51411	bridging integrator 2	BIN2	-0.31	0.122	0.288035	0.2005	-1.55	85.12
9595	cytohesin 1 interacting protein	CYTIP	-0.31	0.123	0.290359	0.2012	-1.54	17.6
25797	glutaminyl-peptide cyclotransferase	QPCT	-0.309	0.00287	0.0467269	0.1037	-2.98	314.06
11051	nudix hydrolase 21	NUDT21	-0.309	0.0131	0.093258	0.1244	-2.48	3870.54
81832	neuropilin and tolloid like 1	NETO1	-0.309	0.0233	0.123567	0.1361	-2.27	3258.94
51059	family with sequence similarity 135 member B	FAM135B	-0.309	0.026	0.129352	0.139	-2.23	1629.28
105377209	uncharacterized LOC105377209	LOC105377209	-0.309	0.0499	0.178715	0.1574	-1.96	40.36
107984124	uncharacterized LOC107984124	LOC107984124	-0.309	0.0553	0.187008	0.1609	-1.92	121.86
27180	sialic acid binding Ig like lectin 9	SIGLEC9	-0.309	0.269	0.466424	0.2797	-1.11	25.04
130507	ubiquitin protein ligase E3 component n-recognin 3	UBR3	-0.308	0.0125	0.0913449	0.1234	-2.5	4255.87
26278	sacsin molecular chaperone	SACS	-0.308	0.0238	0.124424	0.1361	-2.26	4056.6
63974	neuronal differentiation 6	NEUROD6	-0.308	0.035	0.149836	0.1459	-2.11	1691.22
256130	transmembrane protein 196	TMEM196	-0.308	0.0399	0.159443	0.1498	-2.05	711.75
10370	Cbp/p300 interacting transactivator with Glu/Asp rich carboxy-terminal domain 2	CITED2	-0.308	0.0629	0.199581	0.1654	-1.86	1064.34
9340	glucagon like peptide 2 receptor	GLP2R	-0.308	0.105	0.263859	0.1899	-1.62	661.5
388512	C-type lectin domain containing 17A	CLEC17A	-0.308	0.226	0.420051	0.254	-1.21	17.06
9868	translocase of outer mitochondrial membrane 70	TOMM70	-0.307	0.0189	0.111511	0.1307	-2.35	4026.62
22911	WD repeat domain 47	WDR47	-0.307	0.0241	0.124746	0.1359	-2.26	6710.31
151742	protein phosphatase, Mg2+/Mn2+ dependent 1L	PPM1L	-0.307	0.0261	0.129522	0.1379	-2.22	4219.12
339398	leucine rich repeat and Ig domain containing 4	LINGO4	-0.307	0.242	0.438601	0.2624	-1.17	10.76
100507321	endogenous retrovirus group K13 member 1	ERVK13-1	-0.306	0.00104	0.029802	0.0932	-3.28	620.44
64478	CUB and Sushi multiple domains 1	CSMD1	-0.306	0.00299	0.0478353	0.1033	-2.97	2340.53
57168	aspartate beta-hydroxylase domain containing 2	ASPHD2	-0.306	0.0105	0.0844445	0.1196	-2.56	791.57
6695	SPARC (osteonectin), cwcv and kazal like domains proteoglycan 1	SPOCK1	-0.306	0.0115	0.0877102	0.1211	-2.53	13160.9
1741	discs large MAGUK scaffold protein 3	DLG3	-0.306	0.0134	0.094818	0.124	-2.47	4386.01
5601	mitogen-activated protein kinase 9	MAPK9	-0.306	0.0185	0.110199	0.13	-2.36	8873.68
55190	nudix hydrolase 11	NUDT11	-0.306	0.0235	0.124167	0.1353	-2.26	1734.4
151242	protein phosphatase 1 regulatory inhibitor subunit 1C	PPP1R1C	-0.306	0.0258	0.129021	0.1371	-2.23	54.79
9938	Rho GTPase activating protein 25	ARHGAP25	-0.306	0.0466	0.171886	0.1536	-1.99	274.98
222699	transducer of ERBB2, 2 pseudogene 1	TOB2P1	-0.306	0.125	0.292495	0.1993	-1.53	13.22
22954	tripartite motif containing 32	TRIM32	-0.305	0.00607	0.0668461	0.1112	-2.74	835.95
164832	LON peptidase N-terminal domain and ring finger 2	LONRF2	-0.305	0.00826	0.0759243	0.1154	-2.64	14638.6
9110	myotubularin related protein 4	MTMR4	-0.305	0.00849	0.0769354	0.1159	-2.63	3841.06
10059	dynamin 1 like	DNM1L	-0.305	0.0103	0.0839594	0.1189	-2.57	6851.72
64881	protocadherin 20	PCDH20	-0.305	0.0273	0.132253	0.138	-2.21	1383.85
3084	neuregulin 1	NRG1	-0.305	0.0301	0.138748	0.1404	-2.17	718.07
105375921	uncharacterized LOC105375921	LOC105375921	-0.305	0.0273	0.132321	0.1384	-2.21	23.73
107983996	replaced by ID 105371856	LOC107983996	-0.305	0.0466	0.171886	0.1532	-1.99	16.04
810	calmodulin like 3	CALML3	-0.305	0.252	0.447958	0.2665	-1.15	11.9
7093	tolloid like 2	TLL2	-0.304	0.00632	0.0677326	0.1114	-2.73	238.82
84944	maelstrom spermatogenic transposon silencer	MAEL	-0.304	0.00797	0.0746543	0.1144	-2.65	118.51
643783	USP46 divergent transcript	USP46-DT	-0.304	0.0132	0.0940234	0.1227	-2.48	41.72
81831	neuropilin and tolloid like 2	NETO2	-0.304	0.0158	0.102097	0.1262	-2.41	1288.92
338651	KRTAP5-1/KRTAP5-2 antisense RNA 1	KRTAP5-AS1	-0.304	0.024	0.124746	0.1347	-2.26	593.37
55212	Bardet-Biedl syndrome 7	BBS7	-0.304	0.0258	0.128971	0.1363	-2.23	1352.78
64388	gremlin 2, DAN family BMP antagonist	GREM2	-0.304	0.0358	0.151375	0.1446	-2.1	959.6
105373895	uncharacterized LOC105373895	LOC105373895	-0.304	0.0133	0.0940534	0.1228	-2.48	26.42
100528062	ARMCX5-GPRASP2 readthrough	ARMCX5-GPRASP2	-0.303	0.00673	0.0693248	0.112	-2.71	3070.23
29951	PDZ domain containing ring finger 4	PDZRN4	-0.303	0.011	0.0859346	0.1191	-2.54	449.17
10479	solute carrier family 9 member A6	SLC9A6	-0.303	0.0158	0.10203	0.1255	-2.41	6087.28
5798	protein tyrosine phosphatase receptor type N	PTPRN	-0.303	0.0385	0.156498	0.1466	-2.07	31106.7
1607	diacylglycerol kinase beta	DGKB	-0.303	0.0496	0.178236	0.1546	-1.96	3149.91
3352	5-hydroxytryptamine receptor 1D	HTR1D	-0.303	0.065	0.203478	0.164	-1.85	47.76
22829	neuroligin 4 Y-linked	NLGN4Y	-0.303	0.251	0.447094	0.2636	-1.15	1563.05
9023	cholesterol 25-hydroxylase	CH25H	-0.303	0.3	0.498009	0.2925	-1.04	68.95
653659	transmembrane protein 183B, pseudogene	TMEM183BP	-0.302	0.00147	0.034491	0.0948	-3.18	580.6
154807	vitamin K epoxide reductase complex subunit 1 like 1	VKORC1L1	-0.302	0.00235	0.0431085	0.0994	-3.04	2365.93
100873935	MTOR antisense RNA 1	MTOR-AS1	-0.302	0.0152	0.100119	0.1244	-2.43	68.25
83660	talin 2	TLN2	-0.302	0.0213	0.118024	0.1312	-2.3	9341.93
114786	XK related 4	XKR4	-0.302	0.0359	0.151419	0.1438	-2.1	3150.64
105369532	uncharacterized LOC105369532	LOC105369532	-0.302	0.0193	0.112533	0.1291	-2.34	52.55
107984263	uncharacterized LOC107984263	LOC107984263	-0.302	0.01	0.0827769	0.1172	-2.58	62.11
7074	TIAM Rac1 associated GEF 1	TIAM1	-0.301	0.00158	0.0356345	0.0952	-3.16	2558.11
100861402	CERS6 antisense RNA 1	CERS6-AS1	-0.301	0.0421	0.163475	0.1483	-2.03	1620.89
8927	bassoon presynaptic cytomatrix protein	BSN	-0.301	0.0462	0.1713	0.1512	-1.99	36814.6
107987372	uncharacterized LOC107987372	LOC107987372	-0.301	0.0337	0.14682	0.1416	-2.12	20.1
5795	protein tyrosine phosphatase receptor type J	PTPRJ	-0.3	0.00118	0.0312271	0.0924	-3.24	1901.75
9240	PNMA family member 1	PNMA1	-0.3	0.00562	0.0644739	0.1085	-2.77	8921.1
894	cyclin D2	CCND2	-0.3	0.00641	0.0680712	0.1101	-2.73	7043.83
160851	diacylglycerol kinase eta	DGKH	-0.3	0.00683	0.0697402	0.111	-2.71	1725.86
23671	transmembrane protein with EGF like and two follistatin like domains 2	TMEFF2	-0.3	0.00762	0.0733038	0.1123	-2.67	2100.83
3631	inositol polyphosphate-4-phosphatase type I A	INPP4A	-0.3	0.0134	0.0946689	0.1211	-2.47	8317.52
5604	mitogen-activated protein kinase kinase 1	MAP2K1	-0.3	0.0286	0.135135	0.1371	-2.19	8024.9
114569	mal, T cell differentiation protein 2	MAL2	-0.3	0.0579	0.191358	0.158	-1.9	2976.18
27319	basic helix-loop-helix family member e22	BHLHE22	-0.3	0.0595	0.193968	0.1593	-1.88	416.35
574538	uncharacterized LOC574538	LOC574538	-0.3	0.094	0.248098	0.179	-1.67	786.58
729162	zinc finger protein 839 pseudogene	FAM239B	-0.3	0.321	0.519483	0.3022	-0.993	157.29
23220	deltex E3 ubiquitin ligase 4	DTX4	-0.299	0.00559	0.0643886	0.1077	-2.77	3724.77
149371	exocyst complex component 8	EXOC8	-0.299	0.00566	0.0647733	0.108	-2.77	798.61
9369	neurexin 3	NRXN3	-0.299	0.00831	0.0761472	0.1131	-2.64	8443.98
101927621	ZNF567 divergent transcript	ZNF567-DT	-0.299	0.00949	0.0807748	0.1153	-2.59	87.78
55966	adherens junctions associated protein 1	AJAP1	-0.299	0.00959	0.081115	0.1153	-2.59	4498.65
116442	RAB39B, member RAS oncogene family	RAB39B	-0.299	0.0148	0.0987585	0.1226	-2.44	938.48
23136	erythrocyte membrane protein band 4.1 like 3	EPB41L3	-0.299	0.0158	0.101989	0.1237	-2.41	8683.92
51194	importin 11	IPO11	-0.299	0.0179	0.108569	0.1262	-2.37	595.98
114134	solute carrier family 2 member 13	SLC2A13	-0.299	0.0301	0.138748	0.138	-2.17	4272.63
4986	opioid receptor kappa 1	OPRK1	-0.299	0.0343	0.148019	0.1413	-2.12	619.49
57692	MAGE family member E1	MAGEE1	-0.299	0.0358	0.151404	0.1425	-2.1	3387.06
442213	patched domain containing 4	PTCHD4	-0.299	0.0423	0.16375	0.1474	-2.03	392.71
93164	5-hydroxytryptamine receptor 7 pseudogene 1	HTR7P1	-0.299	0.0506	0.179643	0.1528	-1.95	279.31
7306	tyrosinase related protein 1	TYRP1	-0.299	0.0915	0.244411	0.1771	-1.69	69.51
105377212	uncharacterized LOC105377212	LOC105377212	-0.299	0.0122	0.0902632	0.1193	-2.51	86.97
79589	ring finger protein 128	RNF128	-0.298	0.00533	0.0631925	0.1068	-2.79	268.38
10923	SUB1 regulator of transcription	SUB1	-0.298	0.0161	0.102849	0.124	-2.41	4607.1
6416	mitogen-activated protein kinase kinase 4	MAP2K4	-0.298	0.029	0.136082	0.1367	-2.18	5978.57
10794	zinc finger protein 460	ZNF460	-0.298	0.039	0.157351	0.1446	-2.06	393.17
23105	follistatin like 4	FSTL4	-0.298	0.0423	0.163727	0.1469	-2.03	1583.6
143941	tetratricopeptide repeat domain 36	TTC36	-0.297	0.00386	0.0545182	0.1028	-2.89	51.85
54497	HEAT repeat containing 5B	HEATR5B	-0.297	0.0114	0.0873026	0.1175	-2.53	2148.88
84312	BRMS1 like transcriptional repressor	BRMS1L	-0.297	0.0141	0.0967149	0.1208	-2.45	1224.44
51360	membrane bound transcription factor peptidase, site 2	MBTPS2	-0.297	0.0198	0.114076	0.1275	-2.33	673.93
659	bone morphogenetic protein receptor type 2	BMPR2	-0.297	0.0214	0.118486	0.129	-2.3	8125.8
147407	solute carrier family 25 member 52	SLC25A52	-0.297	0.0354	0.15051	0.1412	-2.1	12.03
105375304	SNX10 antisense RNA 1	SNX10-AS1	-0.297	0.0377	0.155142	0.143	-2.08	365.81
23767	fibronectin leucine rich transmembrane protein 3	FLRT3	-0.297	0.0404	0.160199	0.1448	-2.05	700.36
100131390	Sp9 transcription factor	SP9	-0.297	0.0726	0.215769	0.1652	-1.8	203.6
55346	t-complex 11 like 1	TCP11L1	-0.296	0.0033	0.0505367	0.1006	-2.94	4327.03
9498	solute carrier family 4 member 8	SLC4A8	-0.296	0.00606	0.0667989	0.108	-2.74	4963.93
84740	AFAP1 antisense RNA 1	AFAP1-AS1	-0.296	0.00921	0.079524	0.1138	-2.6	135.89
57446	NDRG family member 3	NDRG3	-0.296	0.0233	0.123567	0.1305	-2.27	7215.98
9867	praja ring finger ubiquitin ligase 2	PJA2	-0.296	0.0321	0.14338	0.1383	-2.14	25162.7
4883	natriuretic peptide receptor 3	NPR3	-0.296	0.0486	0.17634	0.1499	-1.97	78.57
10855	heparanase	HPSE	-0.296	0.0592	0.193654	0.157	-1.89	45.04
100169890	PEG3 antisense RNA 1	PEG3-AS1	-0.296	0.062	0.198151	0.1585	-1.87	1703.88
223117	semaphorin 3D	SEMA3D	-0.296	0.0782	0.224347	0.168	-1.76	200.16
348801	leukemia NUP98 fusion partner 1	LNP1	-0.295	0.00522	0.0625612	0.1055	-2.79	293.01
163404	phospholipid phosphatase related 5	PLPPR5	-0.295	0.00583	0.0655371	0.1069	-2.76	861.99
142684	RAB40A, member RAS oncogene family	RAB40A	-0.295	0.00608	0.0668814	0.1076	-2.74	35.5
84669	ubiquitin specific peptidase 32	USP32	-0.295	0.0105	0.0844359	0.1151	-2.56	3825.41
23074	bridge-like lipid transfer protein family member 3B	BLTP3B	-0.295	0.0223	0.12071	0.1292	-2.29	2019.69
30845	EH domain containing 3	EHD3	-0.295	0.0228	0.122117	0.1295	-2.28	12886.3
5799	protein tyrosine phosphatase receptor type N2	PTPRN2	-0.295	0.0253	0.127945	0.1321	-2.24	18117.7
58495	ovo like zinc finger 2	OVOL2	-0.295	0.0327	0.144736	0.1379	-2.14	59.3
57468	solute carrier family 12 member 5	SLC12A5	-0.295	0.0501	0.179082	0.1504	-1.96	25559.6
101929355	CFAP97 domain containing 2	CFAP97D2	-0.295	0.152	0.328039	0.2061	-1.43	19.83
1641	doublecortin	DCX	-0.294	0.00186	0.0382307	0.0946	-3.11	796.59
9910	RAB GTPase activating protein 1 like	RABGAP1L	-0.294	0.00858	0.077391	0.112	-2.63	3030
47	ATP citrate lyase	ACLY	-0.294	0.011	0.0859811	0.1156	-2.54	5370.94
9372	zinc finger FYVE-type containing 9	ZFYVE9	-0.294	0.0119	0.0893616	0.1169	-2.51	3474.83
29979	ubiquilin 1	UBQLN1	-0.294	0.0142	0.0967933	0.1199	-2.45	6290.25
171392	zinc finger protein 675	ZNF675	-0.294	0.019	0.111831	0.1254	-2.34	218.99
961	CD47 molecule	CD47	-0.294	0.0193	0.112533	0.1258	-2.34	7457.26
51303	FKBP prolyl isomerase 11	FKBP11	-0.294	0.0205	0.116006	0.1269	-2.32	1284.39
10116	fem-1 homolog B	FEM1B	-0.294	0.0218	0.119648	0.1282	-2.29	5030.37
26953	RAN binding protein 6	RANBP6	-0.294	0.0253	0.127844	0.1316	-2.24	1981.81
8030	coiled-coil domain containing 6	CCDC6	-0.294	0.0261	0.12947	0.1321	-2.23	4001.39
121256	transmembrane protein 132D	TMEM132D	-0.294	0.0396	0.158836	0.1431	-2.06	2156.69
2562	gamma-aminobutyric acid type A receptor subunit beta3	GABRB3	-0.294	0.0619	0.198072	0.1573	-1.87	8783.57
105370183	long intergenic non-protein coding RNA 390	LINC00390	-0.294	0.167	0.348431	0.2125	-1.38	44.14
54962	TIMELESS interacting protein	TIPIN	-0.293	0.00483	0.0607858	0.1038	-2.82	365.99
10463	solute carrier family 30 member 9	SLC30A9	-0.293	0.0101	0.0830824	0.114	-2.57	3311.87
283450	HECT domain E3 ubiquitin protein ligase 4	HECTD4	-0.293	0.0205	0.115782	0.1264	-2.32	15618.3
10962	MLLT11 transcription factor 7 cofactor	MLLT11	-0.293	0.0219	0.120003	0.1278	-2.29	7080.9
25977	NECAP endocytosis associated 1	NECAP1	-0.293	0.0219	0.120007	0.1276	-2.29	4892.81
401474	sterile alpha motif domain containing 12	SAMD12	-0.293	0.0266	0.130612	0.1322	-2.22	2332.85
5126	proprotein convertase subtilisin/kexin type 2	PCSK2	-0.293	0.0273	0.132282	0.1326	-2.21	5494.05
140689	cerebellin 4 precursor	CBLN4	-0.293	0.069	0.209916	0.1612	-1.82	1029.15
79987	sushi, von Willebrand factor type A, EGF and pentraxin domain containing 1	SVEP1	-0.293	0.0805	0.228198	0.1676	-1.75	318.11
3231	homeobox D1	HOXD1	-0.293	0.352	0.550319	0.3146	-0.932	47.17
5504	protein phosphatase 1 regulatory inhibitor subunit 2	PPP1R2	-0.292	0.00368	0.0533154	0.1005	-2.9	1486.17
144110	transmembrane protein 86A	TMEM86A	-0.292	0.00492	0.0613373	0.104	-2.81	319.82
57110	phospholipase A and acyltransferase 1	PLAAT1	-0.292	0.00499	0.061514	0.1038	-2.81	125.6
55220	kelch domain containing 8A	KLHDC8A	-0.292	0.00523	0.0626266	0.1044	-2.79	641.76
101929428	PTPRD divergent transcript	PTPRD-DT	-0.292	0.0223	0.12071	0.1279	-2.28	31.85
55610	VPS50 subunit of EARP/GARPII complex	VPS50	-0.292	0.0225	0.121103	0.1281	-2.28	1755.75
4897	neuronal cell adhesion molecule	NRCAM	-0.292	0.031	0.141033	0.1353	-2.16	21400.8
646548	ADAM metallopeptidase domain 20 pseudogene	LOC646548	-0.292	0.0802	0.227896	0.1668	-1.75	33.99
10875	fibrinogen like 2	FGL2	-0.292	0.148	0.322346	0.2017	-1.45	110.16
100996465	L1CAM antisense RNA 1	L1CAM-AS1	-0.292	0.213	0.405075	0.2348	-1.24	15.75
143503	olfactory receptor family 51 subfamily E member 1	OR51E1	-0.292	0.309	0.507796	0.2873	-1.02	9.85
56980	PR/SET domain 10	PRDM10	-0.291	0.00415	0.0562397	0.1017	-2.87	593.41
60559	signal peptidase complex subunit 3	SPCS3	-0.291	0.00623	0.0674215	0.1065	-2.74	2108.77
214	activated leukocyte cell adhesion molecule	ALCAM	-0.291	0.0189	0.111448	0.1241	-2.35	3958.82
5915	retinoic acid receptor beta	RARB	-0.291	0.0231	0.123012	0.1283	-2.27	333.62
84280	BTB domain containing 10	BTBD10	-0.291	0.0233	0.123473	0.1282	-2.27	2384.79
91137	solute carrier family 25 member 46	SLC25A46	-0.291	0.0353	0.150321	0.1383	-2.11	2678.25
9118	internexin neuronal intermediate filament protein alpha	INA	-0.291	0.0421	0.163443	0.1433	-2.03	10214.9
57496	myocardin related transcription factor B	MRTFB	-0.291	0.0485	0.176176	0.1476	-1.97	11841.2
401463	BHLHE22 antisense RNA 1	BHLHE22-AS1	-0.291	0.0803	0.227896	0.1662	-1.75	61.36
4948	OCA2 melanosomal transmembrane protein	OCA2	-0.29	0.000617	0.0238993	0.0847	-3.42	210.47
64848	YTH domain containing 2	YTHDC2	-0.29	0.00123	0.0316384	0.0899	-3.23	952.37
317649	eukaryotic translation initiation factor 4E family member 3	EIF4E3	-0.29	0.00626	0.0675343	0.1061	-2.73	2456.95
351	amyloid beta precursor protein	APP	-0.29	0.00913	0.0792023	0.1113	-2.61	81140
84251	SH3GL interacting endocytic adaptor 1	SGIP1	-0.29	0.0114	0.0870691	0.1147	-2.53	3991.54
56138	protocadherin alpha 11	PCDHA11	-0.29	0.0136	0.095301	0.1174	-2.47	279.47
55832	cullin associated and neddylation dissociated 1	CAND1	-0.29	0.0154	0.100564	0.1195	-2.42	5704.89
51555	peroxisomal biogenesis factor 5 like	PEX5L	-0.29	0.0197	0.113786	0.1243	-2.33	8283.17
54704	pyruvate dehydrogenase phosphatase catalytic subunit 1	PDP1	-0.29	0.0397	0.158891	0.1408	-2.06	5715.63
25830	sulfotransferase family 4A member 1	SULT4A1	-0.29	0.0402	0.159893	0.1414	-2.05	14678.2
105373605	uncharacterized LOC105373605	LOC105373605	-0.29	0.147	0.321109	0.2001	-1.45	15.74
107986008		LOC107986008	-0.29	0.0386	0.156586	0.1403	-2.07	20.3
26585	gremlin 1, DAN family BMP antagonist	GREM1	-0.29	0.153	0.329279	0.2029	-1.43	1190.44
79719	alpha and gamma adaptin binding protein	AAGAB	-0.289	0.00447	0.0587042	0.1017	-2.84	1336.06
5591	protein kinase, DNA-activated, catalytic subunit	PRKDC	-0.289	0.00479	0.060613	0.1025	-2.82	5020.53
3157	3-hydroxy-3-methylglutaryl-CoA synthase 1	HMGCS1	-0.289	0.0197	0.113786	0.1241	-2.33	6343.42
10884	mitochondrial ribosomal protein S30	MRPS30	-0.289	0.02	0.114525	0.1242	-2.33	412.73
8506	contactin associated protein 1	CNTNAP1	-0.289	0.0223	0.12071	0.1266	-2.28	19712
8604	solute carrier family 25 member 12	SLC25A12	-0.289	0.0244	0.125543	0.1284	-2.25	2924.14
5532	protein phosphatase 3 catalytic subunit beta	PPP3CB	-0.289	0.049	0.176941	0.147	-1.97	7732.23
3797	kinesin family member 3C	KIF3C	-0.289	0.0494	0.177738	0.1469	-1.97	28779.8
8482	semaphorin 7A (John Milton Hagen blood group)	SEMA7A	-0.289	0.05	0.178756	0.1473	-1.96	3615.99
4747	neurofilament light chain	NEFL	-0.289	0.0528	0.182851	0.1493	-1.94	29073.6
5999	regulator of G protein signaling 4	RGS4	-0.289	0.103	0.260723	0.177	-1.63	21251.8
2322	fms related receptor tyrosine kinase 3	FLT3	-0.289	0.107	0.265962	0.1788	-1.61	72.61
27133	potassium voltage-gated channel subfamily H member 5	KCNH5	-0.289	0.138	0.310253	0.1951	-1.48	915.19
100130673	phosphoribosyl pyrophosphate synthetase 2 pseudogene	LOC100130673	-0.289	0.255	0.451238	0.2537	-1.14	12.12
343171	olfactory receptor family 2 subfamily W member 3	OR2W3	-0.289	0.165	0.344794	0.2078	-1.39	133.18
55039	tRNA methyltransferase 12 homolog	TRMT12	-0.288	0.000705	0.0255272	0.0849	-3.39	316.45
157922	calmodulin regulated spectrin associated protein 1	CAMSAP1	-0.288	0.00685	0.0697977	0.1065	-2.7	4362.5
23080	AVL9 cell migration associated	AVL9	-0.288	0.00888	0.0785748	0.11	-2.62	2723.39
7941	phospholipase A2 group VII	PLA2G7	-0.288	0.0109	0.0856605	0.1132	-2.55	181.39
65059	Ras association (RalGDS/AF-6) and pleckstrin homology domains 1	RAPH1	-0.288	0.017	0.106013	0.1205	-2.39	1478.84
379	ADP ribosylation factor like GTPase 4D	ARL4D	-0.288	0.0362	0.152156	0.1374	-2.1	586.35
100133172	family with sequence similarity 66 member A	FAM66A	-0.288	0.142	0.314784	0.1957	-1.47	98.1
105371828	long intergenic non-protein coding RNA 2073	LINC02073	-0.288	0.0895	0.241333	0.1696	-1.7	29.37
100286986	atrophin-domain containing	LOC100286986	-0.288	0.149	0.324493	0.2001	-1.44	36.54
166336	prickle planar cell polarity protein 2	PRICKLE2	-0.287	0.00675	0.0693948	0.1059	-2.71	3581.76
171024	synaptopodin 2	SYNPO2	-0.287	0.00778	0.0740827	0.1079	-2.66	2198.19
9671	WSC domain containing 2	WSCD2	-0.287	0.017	0.106141	0.1201	-2.39	2264.23
84708	ligand of numb-protein X 1	LNX1	-0.287	0.0171	0.106342	0.1204	-2.38	2082.06
149111	cornichon family AMPA receptor auxiliary protein 3	CNIH3	-0.287	0.0355	0.1508	0.1365	-2.1	1114.09
340120	ankyrin repeat domain 34B	ANKRD34B	-0.287	0.0505	0.179504	0.147	-1.96	45.86
140893	RBBP8 N-terminal like	RBBP8NL	-0.287	0.462	0.649408	0.3897	-0.736	20.53
40	acid sensing ion channel subunit 2	ASIC2	-0.286	0.00817	0.0752638	0.108	-2.65	2020.47
83693	hydroxysteroid dehydrogenase like 1	HSDL1	-0.286	0.0127	0.0918571	0.1149	-2.49	2170.21
170685	nudix hydrolase 10	NUDT10	-0.286	0.0321	0.14338	0.1335	-2.14	957.2
869	cerebellin 1 precursor	CBLN1	-0.286	0.041	0.161648	0.1397	-2.04	223.12
4988	opioid receptor mu 1	OPRM1	-0.286	0.0434	0.165873	0.1417	-2.02	1121.97
100507435	DLGAP2 antisense RNA 1	DLGAP2-AS1	-0.286	0.0502	0.17917	0.1462	-1.96	26.57
8347	H2B clustered histone 4	H2BC4	-0.286	0.126	0.293117	0.1868	-1.53	13.44
100287387	uncharacterized LOC100287387	LOC100287387	-0.286	0.188	0.375779	0.2176	-1.32	179.22
84947	serine active site containing 1	SERAC1	-0.285	0.00518	0.062244	0.102	-2.8	698.94
164	adaptor related protein complex 1 subunit gamma 1	AP1G1	-0.285	0.00742	0.0727155	0.1064	-2.68	3328.92
23467	neuronal pentraxin receptor	NPTXR	-0.285	0.0231	0.122929	0.1255	-2.27	45059.3
2258	fibroblast growth factor 13	FGF13	-0.285	0.0356	0.150982	0.1354	-2.1	3930.26
105375726	MAL2 antisense RNA 1	MAL2-AS1	-0.285	0.0733	0.217002	0.1591	-1.79	296.56
107985688	uncharacterized LOC107985688	LOC107985688	-0.285	0.0598	0.194624	0.1514	-1.88	10.69
285097	uncharacterized FLJ38379	LOC285097	-0.285	0.0632	0.200275	0.1532	-1.86	234.06
64407	regulator of G protein signaling 18	RGS18	-0.285	0.282	0.479577	0.265	-1.08	15.49
60312	actin filament associated protein 1	AFAP1	-0.284	0.00248	0.0437259	0.094	-3.03	1819.48
51143	dynein cytoplasmic 1 light intermediate chain 1	DYNC1LI1	-0.284	0.00669	0.069206	0.1047	-2.71	1577.43
144165	prickle planar cell polarity protein 1	PRICKLE1	-0.284	0.0272	0.132152	0.1288	-2.21	2029.42
23710	GABA type A receptor associated protein like 1	GABARAPL1	-0.284	0.0354	0.15051	0.1349	-2.1	13695.9
6546	solute carrier family 8 member A1	SLC8A1	-0.284	0.0463	0.171475	0.1426	-1.99	7709.53
25903	olfactomedin like 2B	OLFML2B	-0.284	0.0941	0.248381	0.1696	-1.67	364.87
554202	MIR31 host gene	MIR31HG	-0.284	0.101	0.257161	0.173	-1.64	42.45
100861532	RNA, 45S pre-ribosomal N5	RNA45SN5	-0.284	0.22	0.413723	0.2315	-1.23	133247
8728	ADAM metallopeptidase domain 19	ADAM19	-0.283	0.00708	0.070802	0.105	-2.69	734.26
56147	protocadherin alpha 1	PCDHA1	-0.283	0.0105	0.0844584	0.1105	-2.56	341.14
56132	protocadherin beta 3	PCDHB3	-0.283	0.0237	0.124256	0.1249	-2.26	132.01
152006	ring finger protein 38	RNF38	-0.283	0.0247	0.126198	0.1258	-2.25	2782.29
5019	3-oxoacid CoA-transferase 1	OXCT1	-0.283	0.0303	0.139224	0.1305	-2.17	4884.76
6792	cyclin dependent kinase like 5	CDKL5	-0.283	0.0402	0.159885	0.1381	-2.05	8074.02
9951	heparan sulfate-glucosamine 3-sulfotransferase 4	HS3ST4	-0.283	0.0689	0.209916	0.1557	-1.82	1937.03
50831	taste 2 receptor member 3	TAS2R3	-0.283	0.125	0.29271	0.1845	-1.53	14
6754	somatostatin receptor 4	SSTR4	-0.283	0.15	0.324792	0.1965	-1.44	74.46
54757	FAM20A golgi associated secretory pathway pseudokinase	FAM20A	-0.282	0.00326	0.0503452	0.096	-2.94	4991.76
5901	RAN, member RAS oncogene family	RAN	-0.282	0.00421	0.0565371	0.0985	-2.86	4595.13
10955	serine incorporator 3	SERINC3	-0.282	0.0101	0.0830824	0.1095	-2.57	9616.35
1745	distal-less homeobox 1	DLX1	-0.282	0.0123	0.0907307	0.1127	-2.5	531.69
160760	protein phosphatase targeting COQ7	PPTC7	-0.282	0.0138	0.0957621	0.1145	-2.46	1149.26
6772	signal transducer and activator of transcription 1	STAT1	-0.282	0.0147	0.0985851	0.1157	-2.44	2228.7
6715	steroid 5 alpha-reductase 1	SRD5A1	-0.282	0.0233	0.123567	0.1243	-2.27	1890.83
56133	protocadherin beta 2	PCDHB2	-0.282	0.0241	0.124746	0.1252	-2.26	211.82
22920	kinesin associated protein 3	KIFAP3	-0.282	0.0271	0.131848	0.1278	-2.21	6621.76
2155	coagulation factor VII	F7	-0.282	0.0341	0.147735	0.1333	-2.12	169.67
100873993	ITIH4 antisense RNA 1	ITIH4-AS1	-0.282	0.0541	0.184906	0.1465	-1.93	24.59
5330	phospholipase C beta 2	PLCB2	-0.282	0.0635	0.200804	0.1522	-1.86	706.49
90632	long intergenic non-protein coding RNA 473	LINC00473	-0.282	0.138	0.309969	0.1898	-1.48	38.32
105378256	uncharacterized LOC105378256	LOC105378256	-0.282	0.0382	0.155884	0.1362	-2.07	37.61
106631777	RNA, 45S pre-ribosomal N1	RNA45SN1	-0.282	0.23	0.424761	0.2347	-1.2	57471.8
118426	BLOC-1 related complex subunit 5	BORCS5	-0.281	0.00155	0.0353887	0.0886	-3.17	1145.65
51696	hdc homolog, cell cycle regulator	HECA	-0.281	0.00254	0.0442579	0.0932	-3.02	1632.22
57221	ARFGEF family member 3	ARFGEF3	-0.281	0.00833	0.0762437	0.1065	-2.64	11855.3
5802	protein tyrosine phosphatase receptor type S	PTPRS	-0.281	0.00894	0.0788734	0.1076	-2.61	18865
57463	adhesion molecule with Ig like domain 1	AMIGO1	-0.281	0.024	0.124746	0.1244	-2.26	4235.68
9308	CD83 molecule	CD83	-0.281	0.0284	0.134745	0.1281	-2.19	954.53
3746	potassium voltage-gated channel subfamily C member 1	KCNC1	-0.281	0.0324	0.144035	0.1311	-2.14	5023.18
107986700	PRR15 divergent transcript	PRR15-DT	-0.281	0.0665	0.206027	0.1534	-1.84	112.14
102191832	FBXW7 antisense RNA 1	FBXW7-AS1	-0.281	0.0715	0.214033	0.1559	-1.8	321.85
6523	solute carrier family 5 member 1	SLC5A1	-0.281	0.141	0.313676	0.1908	-1.47	14.11
100287225	long intergenic non-protein coding RNA 1630	LINC01630	-0.281	0.128	0.296763	0.1848	-1.52	58.5
101927572	uncharacterized LOC101927572	LOC101927572	-0.281	0.0332	0.145932	0.1319	-2.13	2470.93
105376617	uncharacterized LOC105376617	LOC105376617	-0.281	0.0874	0.238406	0.1646	-1.71	1377.67
107984567	LINE-1 retrotransposable element ORF2 protein-like	LOC107984567	-0.281	0.0875	0.238677	0.1642	-1.71	42.08
100505738	MIR4458 host gene	MIR4458HG	-0.28	0.00581	0.0654897	0.1015	-2.76	217.36
9037	semaphorin 5A	SEMA5A	-0.28	0.00775	0.0739336	0.1051	-2.66	2863.64
7109	trafficking protein particle complex subunit 10	TRAPPC10	-0.28	0.0102	0.0834478	0.1089	-2.57	2305.26
91584	plexin A4	PLXNA4	-0.28	0.0558	0.188191	0.1464	-1.91	5945.63
201140	dehydrogenase/reductase 7C	DHRS7C	-0.28	0.111	0.272799	0.1755	-1.59	17.22
79962	DnaJ heat shock protein family (Hsp40) member C22	DNAJC22	-0.28	0.204	0.394756	0.2206	-1.27	90.06
7103	tetraspanin 8	TSPAN8	-0.28	0.282	0.480122	0.26	-1.07	26.5
22990	pecanex 1	PCNX1	-0.279	0.0128	0.0923469	0.1122	-2.49	3187.31
10653	serine peptidase inhibitor, Kunitz type 2	SPINT2	-0.279	0.0152	0.0999783	0.1151	-2.43	2341.19
65055	receptor accessory protein 1	REEP1	-0.279	0.0217	0.119416	0.1215	-2.3	3542.97
7534	tyrosine 3-monooxygenase/tryptophan 5-monooxygenase activation protein zeta	YWHAZ	-0.279	0.0255	0.128263	0.1247	-2.23	27778.4
100130148	MAPT intronic transcript 1	MAPT-IT1	-0.279	0.0306	0.140179	0.1292	-2.16	207.78
10371	semaphorin 3A	SEMA3A	-0.279	0.05	0.178756	0.1422	-1.96	590.79
100861541	DOCK9 divergent transcript	DOCK9-DT	-0.279	0.0521	0.181937	0.1438	-1.94	106.43
4744	neurofilament heavy chain	NEFH	-0.279	0.117	0.281795	0.1782	-1.57	4384.3
105373174		LOC105373174	-0.279	0.0522	0.182087	0.1435	-1.94	18.42
84735	carnosine dipeptidase 1	CNDP1	-0.279	0.291	0.488629	0.264	-1.06	3352.33
102659353	TNF and HNRNPL related immunoregulatory long non-coding RNA	THRIL	-0.278	0.000981	0.0289578	0.0844	-3.3	268.28
545	ATR serine/threonine kinase	ATR	-0.278	0.00502	0.061514	0.0989	-2.81	828.67
56136	protocadherin alpha 13	PCDHA13	-0.278	0.00547	0.0638722	0.1	-2.78	246.24
222553	solute carrier family 35 member F1	SLC35F1	-0.278	0.00635	0.0678684	0.102	-2.73	4333.37
51138	COP9 signalosome subunit 4	COPS4	-0.278	0.0101	0.0832665	0.1079	-2.57	1346.84
8706	beta-1,3-N-acetylgalactosaminyltransferase 1 (globoside blood group)	B3GALNT1	-0.278	0.0137	0.0956411	0.1127	-2.46	1590.25
5797	protein tyrosine phosphatase receptor type M	PTPRM	-0.278	0.0137	0.095673	0.113	-2.46	3452.8
101927777	SATB1 antisense RNA 1	SATB1-AS1	-0.278	0.017	0.105932	0.1164	-2.39	62.12
440854	calpain 14	CAPN14	-0.278	0.0375	0.154858	0.1336	-2.08	22.26
344758	G protein-coupled receptor 149	GPR149	-0.278	0.0421	0.163443	0.1367	-2.03	49.73
121456	solute carrier family 9 member 7 pseudogene 1	SLC9A7P1	-0.278	0.0539	0.184578	0.1443	-1.93	326.16
366	aquaporin 9	AQP9	-0.278	0.116	0.279499	0.1766	-1.57	68.85
65267	WNK lysine deficient protein kinase 3	WNK3	-0.277	0.00542	0.063642	0.0995	-2.78	609.4
9875	URB1 ribosome biogenesis homolog	URB1	-0.277	0.00559	0.0643473	0.0999	-2.77	2193.86
2673	glutamine--fructose-6-phosphate transaminase 1	GFPT1	-0.277	0.00786	0.0741689	0.1044	-2.66	2003.43
56145	protocadherin alpha 3	PCDHA3	-0.277	0.0138	0.0959264	0.1124	-2.46	312.93
64744	small ArfGAP2	SMAP2	-0.277	0.0189	0.111511	0.1182	-2.35	5800.97
257203	Down syndrome critical region 9	DSCR9	-0.277	0.0196	0.113627	0.1188	-2.33	18.55
2257	fibroblast growth factor 12	FGF12	-0.277	0.0372	0.154475	0.1332	-2.08	6211.32
287	ankyrin 2	ANK2	-0.277	0.0375	0.154858	0.1334	-2.08	38467
389206	BEN domain containing 4	BEND4	-0.277	0.0407	0.160715	0.1353	-2.05	254.25
101929655	TMC3 antisense RNA 1	TMC3-AS1	-0.277	0.0678	0.208053	0.1518	-1.83	14.68
338811	TAFA chemokine like family member 2	TAFA2	-0.277	0.0929	0.246779	0.1646	-1.68	1421.84
105372236	uncharacterized LOC105372236	LOC105372236	-0.277	0.067	0.206697	0.1513	-1.83	61.3
100379251	NPPA antisense RNA 1	NPPA-AS1	-0.276	0.011	0.0859788	0.1084	-2.54	642.4
9312	potassium voltage-gated channel subfamily B member 2	KCNB2	-0.276	0.0114	0.0871783	0.109	-2.53	646.2
53353	LDL receptor related protein 1B	LRP1B	-0.276	0.0121	0.0902291	0.1098	-2.51	3280.4
5599	mitogen-activated protein kinase 8	MAPK8	-0.276	0.0168	0.105158	0.1155	-2.39	2142.9
22865	SLIT and NTRK like family member 3	SLITRK3	-0.276	0.0218	0.119772	0.1204	-2.29	1188.22
10564	ADP ribosylation factor guanine nucleotide exchange factor 2	ARFGEF2	-0.276	0.0267	0.130814	0.1247	-2.22	3621.14
2977	guanylate cyclase 1 soluble subunit alpha 2	GUCY1A2	-0.276	0.0393	0.158089	0.1338	-2.06	3484.49
100499489	long intergenic non-protein coding RNA 3027	LINC03027	-0.276	0.0238	0.124395	0.1221	-2.26	268.26
724102	small nucleolar RNA host gene 4	SNHG4	-0.275	0.00739	0.0726881	0.1027	-2.68	54.07
27039	polycystin 2 like 2, transient receptor potential cation channel	PKD2L2	-0.275	0.0263	0.130109	0.1238	-2.22	237.67
4168	MCF.2 cell line derived transforming sequence	MCF2	-0.275	0.0336	0.146673	0.1296	-2.13	423.53
2444	fyn related Src family tyrosine kinase	FRK	-0.275	0.0432	0.165377	0.1361	-2.02	133.59
387628	fibroblast growth factor 7 pseudogene 6	FGF7P6	-0.275	0.0482	0.17561	0.139	-1.98	114.78
105371768	uncharacterized LOC105371768	LOC105371768	-0.275	0.0285	0.135135	0.1255	-2.19	314.16
1738	dihydrolipoamide dehydrogenase	DLD	-0.274	0.00347	0.0515723	0.0939	-2.92	1860.63
8634	RNA 3'-terminal phosphate cyclase	RTCA	-0.274	0.00409	0.055783	0.0953	-2.87	862.45
9732	dedicator of cytokinesis 4	DOCK4	-0.274	0.011	0.0859346	0.1079	-2.54	3722.14
8945	beta-transducin repeat containing E3 ubiquitin protein ligase	BTRC	-0.274	0.0173	0.106925	0.1152	-2.38	4217.03
6752	somatostatin receptor 2	SSTR2	-0.274	0.0255	0.128346	0.1226	-2.23	5115.19
158471	prune homolog 2 with BCH domain	PRUNE2	-0.274	0.0351	0.150018	0.1301	-2.11	7936.26
80342	TRAF3 interacting protein 3	TRAF3IP3	-0.274	0.0447	0.168786	0.1364	-2.01	38.27
90768	TENM3 antisense RNA 1	TENM3-AS1	-0.274	0.0591	0.193654	0.145	-1.89	57.87
286002	SLC26A4 antisense RNA 1	SLC26A4-AS1	-0.274	0.0668	0.206311	0.1494	-1.83	3011.55
5058	p21 (RAC1) activated kinase 1	PAK1	-0.274	0.0799	0.227556	0.1564	-1.75	13794.2
4843	nitric oxide synthase 2	NOS2	-0.274	0.0817	0.229744	0.1576	-1.74	311.9
814	calcium/calmodulin dependent protein kinase IV	CAMK4	-0.274	0.0978	0.253104	0.1653	-1.66	3136.08
285758	MARCKS cis regulating lncRNA promoter of cytokines and inflammation	MROCKI	-0.274	0.193	0.381794	0.2104	-1.3	47.84
81285	olfactory receptor family 51 subfamily E member 2	OR51E2	-0.274	0.213	0.404591	0.2196	-1.25	14.34
147	adrenoceptor alpha 1B	ADRA1B	-0.273	0.0122	0.0903803	0.1091	-2.51	1787.31
23035	PH domain and leucine rich repeat protein phosphatase 2	PHLPP2	-0.273	0.0147	0.098328	0.1119	-2.44	2713.83
6782	heat shock protein family A (Hsp70) member 13	HSPA13	-0.273	0.0168	0.105158	0.1143	-2.39	2376.94
79722	ankyrin repeat domain 55	ANKRD55	-0.273	0.0181	0.10934	0.1156	-2.36	88.18
100874238	ARHGEF7 antisense RNA 2	ARHGEF7-AS2	-0.273	0.0229	0.122313	0.1199	-2.28	65.25
654463	fer-1 like family member 6	FER1L6	-0.273	0.0446	0.168532	0.1358	-2.01	35.93
645158	CBX3 pseudogene 2	CBX3P2	-0.273	0.11	0.271172	0.171	-1.6	16.65
219578	zinc finger protein 804B	ZNF804B	-0.273	0.134	0.305188	0.1823	-1.5	113.65
100131604	DPP4 divergent transcript	DPP4-DT	-0.273	0.138	0.310304	0.1844	-1.48	12.72
339505	long intergenic non-protein coding RNA 1141	LINC01141	-0.273	0.0389	0.157186	0.1321	-2.07	86.84
4692	necdin, MAGE family member	NDN	-0.272	0.00236	0.0431085	0.0894	-3.04	2011.92
79876	ubiquitin like modifier activating enzyme 5	UBA5	-0.272	0.00335	0.0508682	0.0925	-2.93	1463.47
100526739	CENPS-CORT readthrough	CENPS-CORT	-0.272	0.00568	0.0648647	0.0985	-2.77	184.19
79750	zinc finger protein 385D	ZNF385D	-0.272	0.0078	0.0740933	0.1024	-2.66	2843.48
55322	chromosome 5 open reading frame 22	C5orf22	-0.272	0.00815	0.0751886	0.1029	-2.65	898.79
6400	SEL1L adaptor subunit of ERAD E3 ubiquitin ligase	SEL1L	-0.272	0.00919	0.079466	0.1046	-2.6	3063.55
23198	proteasome activator subunit 4	PSME4	-0.272	0.0133	0.0940765	0.1097	-2.48	1153.65
7712	zinc finger protein 157	ZNF157	-0.272	0.0241	0.124786	0.1205	-2.26	29.61
80762	Nedd4 family interacting protein 1	NDFIP1	-0.272	0.0243	0.125372	0.1208	-2.25	12422.4
5110	protein-L-isoaspartate (D-aspartate) O-methyltransferase	PCMT1	-0.272	0.0251	0.127491	0.1214	-2.24	6580.65
119	adducin 2	ADD2	-0.272	0.0271	0.131848	0.1231	-2.21	13484.4
1746	distal-less homeobox 2	DLX2	-0.272	0.0326	0.14469	0.1274	-2.14	95.43
1949	ephrin B3	EFNB3	-0.272	0.0391	0.15759	0.132	-2.06	5370.88
1235	C-C motif chemokine receptor 6	CCR6	-0.272	0.0402	0.159885	0.1327	-2.05	42.36
285484	JAKMIP1 divergent transcript	JAKMIP1-DT	-0.272	0.0646	0.202971	0.1474	-1.85	363.53
100134444	potassium inwardly rectifying channel subfamily J member 18	KCNJ18	-0.272	0.07	0.211572	0.1503	-1.81	113.31
100874212	MYCBP2 antisense RNA 1	MYCBP2-AS1	-0.272	0.121	0.287678	0.1752	-1.55	697.68
105373009	uncharacterized LL22NC03-13G6.2	LL22NC03-13G6.2	-0.272	0.144	0.317776	0.186	-1.46	92.5
105375911	uncharacterized LOC105375911	LOC105375911	-0.272	0.117	0.281593	0.174	-1.57	11.16
644070	GSG1 like 2	GSG1L2	-0.272	0.178	0.362284	0.2023	-1.35	28.87
7412	vascular cell adhesion molecule 1	VCAM1	-0.272	0.22	0.412641	0.2217	-1.23	76.88
3116	major histocompatibility complex, class II, DP beta 2 (pseudogene)	HLA-DPB2	-0.272	0.223	0.417527	0.2232	-1.22	24.35
127833	synaptotagmin 2	SYT2	-0.272	0.356	0.554418	0.2949	-0.924	1183.71
1303	collagen type XII alpha 1 chain	COL12A1	-0.271	0.000167	0.014055	0.0719	-3.76	558.12
129049	small G protein signaling modulator 1	SGSM1	-0.271	0.00975	0.0817576	0.1049	-2.58	5097.48
8833	guanine monophosphate synthase	GMPS	-0.271	0.0111	0.0861474	0.1067	-2.54	2163.15
388403	yippee like 2	YPEL2	-0.271	0.0127	0.0920424	0.1087	-2.49	2037.29
55013	mitochondrial calcium uniporter dominant negative subunit beta	MCUB	-0.271	0.0143	0.0972098	0.1104	-2.45	170.28
9108	myotubularin related protein 7	MTMR7	-0.271	0.0167	0.104696	0.1131	-2.39	1045.96
56141	protocadherin alpha 7	PCDHA7	-0.271	0.0182	0.109662	0.1148	-2.36	280.11
4976	OPA1 mitochondrial dynamin like GTPase	OPA1	-0.271	0.0315	0.141985	0.1261	-2.15	5265.52
7533	tyrosine 3-monooxygenase/tryptophan 5-monooxygenase activation protein eta	YWHAH	-0.271	0.0315	0.142194	0.1262	-2.15	36496.9
6519	solute carrier family 3 member 1	SLC3A1	-0.271	0.032	0.143035	0.1265	-2.14	8204.21
143098	MAGUK p55 scaffold protein 7	MPP7	-0.271	0.04	0.159556	0.1319	-2.05	454.64
375057	stum, mechanosensory transduction mediator homolog	STUM	-0.271	0.0483	0.175744	0.1374	-1.97	17040.4
55521	tripartite motif containing 36	TRIM36	-0.271	0.0516	0.18123	0.1394	-1.95	1821.45
1005	cadherin 7	CDH7	-0.271	0.0594	0.193964	0.144	-1.88	399.61
59084	ectonucleotide pyrophosphatase/phosphodiesterase family member 5	ENPP5	-0.271	0.0676	0.207762	0.148	-1.83	1758.42
645455	centrosomal protein 170 pseudogene 1	CEP170P1	-0.271	0.0749	0.21942	0.1522	-1.78	261.46
55359	serine/threonine/tyrosine kinase 1	STYK1	-0.271	0.126	0.294223	0.1772	-1.53	509.24
10288	leukocyte immunoglobulin like receptor B2	LILRB2	-0.271	0.189	0.376874	0.2064	-1.31	29.26
83468	glycosyltransferase 8 domain containing 2	GLT8D2	-0.27	0.00342	0.0512805	0.0923	-2.93	190.42
56124	protocadherin beta 12	PCDHB12	-0.27	0.00479	0.060613	0.0957	-2.82	145.34
7334	ubiquitin conjugating enzyme E2 N	UBE2N	-0.27	0.00696	0.0704052	0.1	-2.7	3400.9
5911	RAP2A, member of RAS oncogene family	RAP2A	-0.27	0.00898	0.0788921	0.1031	-2.61	4860.71
8522	growth arrest specific 7	GAS7	-0.27	0.0107	0.0851846	0.1057	-2.55	39754.4
5217	profilin 2	PFN2	-0.27	0.0139	0.0959529	0.1099	-2.46	15216.4
23025	unc-13 homolog A	UNC13A	-0.27	0.0323	0.143824	0.1262	-2.14	21868.5
85376	RIMS binding protein 3	RIMBP3	-0.27	0.117	0.281689	0.1721	-1.57	60.26
100132354	long intergenic non-protein coding RNA 1512	LINC01512	-0.27	0.162	0.341265	0.1929	-1.4	46.38
100507651	long intergenic non-protein coding RNA 1606	LINC01606	-0.27	0.133	0.302755	0.1793	-1.5	16.66
101929322	integrator complex subunit 4 pseudogene	LOC101929322	-0.27	0.0524	0.182256	0.1392	-1.94	166.85
112268301		LOC112268301	-0.27	0.0301	0.138748	0.1244	-2.17	92.56
9254	calcium voltage-gated channel auxiliary subunit alpha2delta 2	CACNA2D2	-0.269	0.00821	0.0755318	0.1017	-2.64	1442.64
55706	NDC1 transmembrane nucleoporin	NDC1	-0.269	0.0157	0.101748	0.1115	-2.42	469
122830	N-alpha-acetyltransferase 30, NatC catalytic subunit	NAA30	-0.269	0.0182	0.10934	0.1138	-2.36	1471.21
55041	pleckstrin homology domain containing B2	PLEKHB2	-0.269	0.0207	0.116262	0.1162	-2.31	12087.5
29906	ST8 alpha-N-acetyl-neuraminide alpha-2,8-sialyltransferase 5	ST8SIA5	-0.269	0.0246	0.125837	0.1195	-2.25	6412.13
163882	consortin, connexin sorting protein	CNST	-0.269	0.0279	0.133474	0.1222	-2.2	2571.56
25924	myosin VIIA and Rab interacting protein	MYRIP	-0.269	0.0314	0.141887	0.125	-2.15	3370.9
64409	polypeptide N-acetylgalactosaminyltransferase 17	GALNT17	-0.269	0.0323	0.1438	0.1255	-2.14	13870.6
148252	DIRAS family GTPase 1	DIRAS1	-0.269	0.0395	0.158632	0.1305	-2.06	12933.5
399829	long intergenic non-protein coding RNA 1168	LINC01168	-0.269	0.0415	0.162354	0.132	-2.04	253.38
105370360	uncharacterized LOC105370360	LOC105370360	-0.269	0.121	0.287139	0.1733	-1.55	26.46
107987138	uncharacterized LOC107987138	LOC107987138	-0.269	0.11	0.271743	0.1683	-1.6	129.97
861	RUNX family transcription factor 1	RUNX1	-0.269	0.149	0.323808	0.1867	-1.44	87.81
79068	FTO alpha-ketoglutarate dependent dioxygenase	FTO	-0.268	0.00469	0.0600154	0.0949	-2.83	5098.15
23392	Ecm29 proteasome adaptor and scaffold	ECPAS	-0.268	0.00851	0.0769768	0.1018	-2.63	5748.98
116541	mitochondrial ribosomal protein L54	MRPL54	-0.268	0.00881	0.0783743	0.1023	-2.62	163.89
158399	zinc finger protein 483	ZNF483	-0.268	0.00946	0.080643	0.1034	-2.59	7883.92
5631	phosphoribosyl pyrophosphate synthetase 1	PRPS1	-0.268	0.0123	0.0907307	0.1072	-2.5	1676.23
64921	CAS1 domain containing 1	CASD1	-0.268	0.014	0.0963042	0.1091	-2.46	2905.03
7991	tumor suppressor candidate 3	TUSC3	-0.268	0.0192	0.112241	0.1144	-2.34	2315.59
29767	tropomodulin 2	TMOD2	-0.268	0.029	0.136047	0.1228	-2.18	22034
2134	exostosin like glycosyltransferase 1	EXTL1	-0.268	0.0331	0.145856	0.1258	-2.13	5814.48
6653	sortilin related receptor 1	SORL1	-0.268	0.0337	0.146825	0.1261	-2.12	15193.7
5534	protein phosphatase 3 regulatory subunit B, alpha	PPP3R1	-0.268	0.0412	0.161954	0.1315	-2.04	12290.8
157773	chromosome 8 open reading frame 48	C8orf48	-0.268	0.0558	0.188191	0.1399	-1.91	17.33
84000	transmembrane serine protease 13	TMPRSS13	-0.268	0.102	0.258849	0.1638	-1.64	18.89
101927795	BZW1 antisense RNA 1	BZW1-AS1	-0.268	0.137	0.308648	0.1805	-1.49	12.28
2043	EPH receptor A4	EPHA4	-0.268	0.139	0.311343	0.1809	-1.48	6774.97
105369588	long intergenic non-protein coding RNA 2717	LINC02717	-0.268	0.214	0.406521	0.216	-1.24	15.72
105377021		LOC105377021	-0.268	0.108	0.267473	0.1667	-1.61	54.01
1392	corticotropin releasing hormone	CRH	-0.268	0.153	0.328886	0.1875	-1.43	222.98
79974	cadherin like and PC-esterase domain containing 1	CPED1	-0.268	0.238	0.433745	0.2271	-1.18	103.61
121053	NOP protein chaperone 1	NOPCHAP1	-0.267	0.00624	0.0674335	0.0975	-2.74	1452.22
25814	ataxin 10	ATXN10	-0.267	0.0146	0.0982014	0.1095	-2.44	4448.75
9764	KIAA0513	KIAA0513	-0.267	0.0176	0.107897	0.1123	-2.37	25530.3
90627	StAR related lipid transfer domain containing 13	STARD13	-0.267	0.0189	0.111448	0.1136	-2.35	1633.13
78991	prenylcysteine oxidase 1 like	PCYOX1L	-0.267	0.0254	0.128055	0.1195	-2.24	1178.92
8792	TNF receptor superfamily member 11a	TNFRSF11A	-0.267	0.0336	0.146673	0.1255	-2.13	311.81
55030	F-box protein 34	FBXO34	-0.267	0.0478	0.174681	0.1352	-1.98	2129.53
9633	testis expressed metallothionein like protein	TESMIN	-0.267	0.0603	0.195237	0.1423	-1.88	80.3
9892	synaptosome associated protein 91	SNAP91	-0.267	0.067	0.206646	0.1456	-1.83	15969
100289410	MCF2L antisense RNA 1	MCF2L-AS1	-0.267	0.0684	0.209134	0.1465	-1.82	66.96
112268052		LOC112268052	-0.267	0.0717	0.214256	0.1485	-1.8	147.8
3684	integrin subunit alpha M	ITGAM	-0.267	0.251	0.447377	0.2327	-1.15	199.95
7804	LDL receptor related protein 8	LRP8	-0.266	0.00142	0.0336837	0.0833	-3.19	2854.64
6675	UDP-N-acetylglucosamine pyrophosphorylase 1	UAP1	-0.266	0.00493	0.061392	0.0946	-2.81	851.01
9334	beta-1,4-galactosyltransferase 5	B4GALT5	-0.266	0.00534	0.0632816	0.0956	-2.79	2819.66
57037	ankyrin repeat and MYND domain containing 2	ANKMY2	-0.266	0.00913	0.0792023	0.1019	-2.61	1171.32
79718	TBL1X/Y related 1	TBL1XR1	-0.266	0.00971	0.0816015	0.1029	-2.59	4258.91
644903	GCC2 antisense RNA 1	GCC2-AS1	-0.266	0.0151	0.0997322	0.1094	-2.43	91.77
5063	p21 (RAC1) activated kinase 3	PAK3	-0.266	0.0182	0.10934	0.1128	-2.36	13390.1
122553	trafficking protein particle complex subunit 6B	TRAPPC6B	-0.266	0.0418	0.162875	0.1309	-2.04	2767.95
9758	FERM and PDZ domain containing 4	FRMPD4	-0.266	0.0488	0.176582	0.1352	-1.97	4124.85
80737	von Willebrand factor A domain containing 7	VWA7	-0.266	0.049	0.176914	0.1349	-1.97	905.58
22853	lemur tyrosine kinase 2	LMTK2	-0.266	0.0666	0.206064	0.1451	-1.83	7163.29
1006	cadherin 8	CDH8	-0.266	0.0718	0.214385	0.1479	-1.8	1711.27
84433	caspase recruitment domain family member 11	CARD11	-0.266	0.0756	0.22061	0.1499	-1.78	199.64
8745	ADAM metallopeptidase domain 23	ADAM23	-0.266	0.0764	0.222027	0.1498	-1.77	4717.55
105373366	uncharacterized IDS2	IDS2	-0.266	0.0942	0.248503	0.1589	-1.67	487.16
94160	ATP binding cassette subfamily C member 12	ABCC12	-0.266	0.128	0.297415	0.175	-1.52	137.94
103344931	uncharacterized LOC103344931	LOC103344931	-0.266	0.00919	0.079466	0.102	-2.6	1183.81
105370754	replaced by ID 102724078	LOC105370754	-0.266	0.0711	0.213439	0.1473	-1.8	12.98
93664	calcium dependent secretion activator 2	CADPS2	-0.266	0.186	0.373233	0.2012	-1.32	1954.62
81704	dedicator of cytokinesis 8	DOCK8	-0.266	0.207	0.39798	0.211	-1.26	169.37
23095	kinesin family member 1B	KIF1B	-0.265	0.00252	0.043991	0.0877	-3.02	32053.4
139735	ZFP92 zinc finger protein	ZFP92	-0.265	0.0103	0.0839819	0.1034	-2.56	657.17
5128	cyclin dependent kinase 17	CDK17	-0.265	0.0122	0.0905837	0.1059	-2.51	3705.39
55323	La ribonucleoprotein 6, translational regulator	LARP6	-0.265	0.0152	0.0999705	0.1093	-2.43	3091.3
55972	solute carrier family 25 member 40	SLC25A40	-0.265	0.0198	0.114076	0.1136	-2.33	1030.7
100873954	SNRK antisense RNA 1	SNRK-AS1	-0.265	0.0206	0.116177	0.1143	-2.31	772.27
7695	zinc finger protein 136	ZNF136	-0.265	0.0211	0.117745	0.1152	-2.31	307.82
11245	G protein-coupled receptor 176	GPR176	-0.265	0.0265	0.130441	0.1194	-2.22	2678.26
10313	reticulon 3	RTN3	-0.265	0.0369	0.153775	0.1269	-2.09	33042.9
408050	NODAL modulator 3	NOMO3	-0.265	0.0396	0.158805	0.1287	-2.06	5206.62
4880	natriuretic peptide C	NPPC	-0.265	0.0404	0.160199	0.1293	-2.05	50.71
55312	riboflavin kinase	RFK	-0.265	0.053	0.183089	0.1367	-1.94	2592.21
54602	Nedd4 family interacting protein 2	NDFIP2	-0.265	0.065	0.203389	0.1437	-1.85	6405.83
11122	protein tyrosine phosphatase receptor type T	PTPRT	-0.265	0.072	0.2148	0.1471	-1.8	8913.18
476	ATPase Na+/K+ transporting subunit alpha 1	ATP1A1	-0.265	0.0851	0.23512	0.1542	-1.72	32756
84618	5'-nucleotidase, cytosolic IA	NT5C1A	-0.265	0.092	0.245238	0.1574	-1.69	116.37
23259	DDHD domain containing 2	DDHD2	-0.264	0.0117	0.0883742	0.1045	-2.52	4523.82
481	ATPase Na+/K+ transporting subunit beta 1	ATP1B1	-0.264	0.014	0.0963549	0.1074	-2.46	21732.1
4293	mitogen-activated protein kinase kinase kinase 9	MAP3K9	-0.264	0.0278	0.133157	0.1202	-2.2	7010.93
3742	potassium voltage-gated channel subfamily A member 6	KCNA6	-0.264	0.0282	0.134353	0.1204	-2.19	2325.92
100302274	microRNA 1178	MIR1178	-0.264	0.0474	0.173667	0.1333	-1.98	63.37
126298	immunity related GTPase Q	IRGQ	-0.263	0.00142	0.0336926	0.0823	-3.19	4954.36
7881	potassium voltage-gated channel subfamily A regulatory beta subunit 1	KCNAB1	-0.263	0.00483	0.0607858	0.0931	-2.82	3271.6
103	adenosine deaminase RNA specific	ADAR	-0.263	0.00992	0.082398	0.1018	-2.58	9456.67
91663	myeloid associated differentiation marker	MYADM	-0.263	0.0106	0.0848347	0.103	-2.56	3720.41
129607	cytidine/uridine monophosphate kinase 2	CMPK2	-0.263	0.0204	0.115572	0.1134	-2.32	305.86
10891	PPARG coactivator 1 alpha	PPARGC1A	-0.263	0.0221	0.120376	0.1147	-2.29	1112.75
5000	origin recognition complex subunit 4	ORC4	-0.263	0.0308	0.140643	0.1218	-2.16	1606.63
10128	leucine rich pentatricopeptide repeat containing	LRPPRC	-0.263	0.0325	0.144274	0.1229	-2.14	5248.75
100128081	JAZF1 antisense RNA 1	JAZF1-AS1	-0.263	0.0383	0.155932	0.1268	-2.07	136.19
135112	nuclear receptor coactivator 7	NCOA7	-0.263	0.056	0.188456	0.1374	-1.91	7588.64
84899	transmembrane O-mannosyltransferase targeting cadherins 4	TMTC4	-0.263	0.116	0.279481	0.1669	-1.57	1157.25
105372026	uncharacterized LOC105372026	LOC105372026	-0.263	0.0623	0.198615	0.1412	-1.86	454.05
27072	VPS41 subunit of HOPS complex	VPS41	-0.262	0.00406	0.0556374	0.0912	-2.87	3949.57
2629	glucosylceramidase beta 1	GBA1	-0.262	0.00548	0.0638788	0.0944	-2.78	2179.87
79699	zyg-11 family member B, cell cycle regulator	ZYG11B	-0.262	0.0176	0.107911	0.1102	-2.37	5806.38
80144	Fraser extracellular matrix complex subunit 1	FRAS1	-0.262	0.0184	0.109924	0.1111	-2.36	1058.3
4209	myocyte enhancer factor 2D	MEF2D	-0.262	0.0258	0.129021	0.1174	-2.23	10882.7
23314	SATB homeobox 2	SATB2	-0.262	0.0318	0.142579	0.1218	-2.15	2542.93
22883	calsyntenin 1	CLSTN1	-0.262	0.0319	0.142852	0.1222	-2.15	54472.1
2834	prolactin releasing hormone receptor	PRLHR	-0.262	0.0425	0.163988	0.1293	-2.03	110.03
11221	dual specificity phosphatase 10	DUSP10	-0.262	0.0462	0.171211	0.1316	-1.99	220.16
2563	gamma-aminobutyric acid type A receptor subunit delta	GABRD	-0.262	0.0503	0.179219	0.1336	-1.96	5214.47
3786	potassium voltage-gated channel subfamily Q member 3	KCNQ3	-0.262	0.0777	0.223608	0.1486	-1.76	8734.15
283209	phosphoglucomutase 2 like 1	PGM2L1	-0.262	0.0786	0.224978	0.1492	-1.76	14176.2
8649	late endosomal/lysosomal adaptor, MAPK and MTOR activator 3	LAMTOR3	-0.262	0.0852	0.235257	0.1522	-1.72	2282.01
6857	synaptotagmin 1	SYT1	-0.262	0.0989	0.254923	0.159	-1.65	79207.1
64399	hedgehog interacting protein	HHIP	-0.262	0.324	0.522906	0.2659	-0.987	1357.8
2936	glutathione-disulfide reductase	GSR	-0.261	0.00125	0.0317607	0.0807	-3.23	997.89
10026	phosphatidylinositol glycan anchor biosynthesis class K	PIGK	-0.261	0.0111	0.0859811	0.1025	-2.54	927.12
9481	solute carrier family 25 member 27	SLC25A27	-0.261	0.0223	0.12071	0.1143	-2.28	2058.45
54332	ganglioside induced differentiation associated protein 1	GDAP1	-0.261	0.0243	0.125321	0.116	-2.25	4456.27
23229	Cdc42 guanine nucleotide exchange factor 9	ARHGEF9	-0.261	0.0314	0.141829	0.1213	-2.15	12298.3
25791	neuronal guanine nucleotide exchange factor	NGEF	-0.261	0.043	0.16503	0.1287	-2.02	13844.7
27065	neuronal vesicle trafficking associated 1	NSG1	-0.261	0.0453	0.169829	0.1303	-2	2277.68
3156	3-hydroxy-3-methylglutaryl-CoA reductase	HMGCR	-0.261	0.049	0.176914	0.1325	-1.97	3500.91
408263	fibronectin type III domain containing 9	FNDC9	-0.261	0.0512	0.180389	0.1339	-1.95	472.74
257194	neuronal growth regulator 1	NEGR1	-0.261	0.0525	0.182413	0.1347	-1.94	9659.42
100500905	microRNA 3661	MIR3661	-0.261	0.0604	0.195237	0.1389	-1.88	313.94
2819	glycerol-3-phosphate dehydrogenase 1	GPD1	-0.261	0.0713	0.213861	0.1449	-1.8	922.76
2911	glutamate metabotropic receptor 1	GRM1	-0.261	0.0716	0.214093	0.1449	-1.8	1501.18
148808	major facilitator superfamily domain containing 4A	MFSD4A	-0.261	0.0747	0.219096	0.1465	-1.78	5899.82
8365	H4 clustered histone 8	H4C8	-0.261	0.123	0.289878	0.1695	-1.54	12.2
79098	chromosome 1 open reading frame 116	C1orf116	-0.261	0.134	0.304791	0.1744	-1.5	12.31
101927947	uncharacterized LOC101927947	LOC101927947	-0.261	0.0393	0.158041	0.1269	-2.06	38.37
101928419	uncharacterized LOC101928419	LOC101928419	-0.261	0.13	0.298726	0.1723	-1.52	10.63
107986948		LOC107986948	-0.261	0.06	0.194874	0.139	-1.88	14.25
6423	secreted frizzled related protein 2	SFRP2	-0.261	0.188	0.375924	0.1981	-1.32	210.17
164118	tetratricopeptide repeat domain 24	TTC24	-0.261	0.203	0.393421	0.2048	-1.27	11.92
2132	exostosin glycosyltransferase 2	EXT2	-0.26	0.00174	0.0372186	0.0832	-3.13	2133.96
57616	teashirt zinc finger homeobox 3	TSHZ3	-0.26	0.00202	0.0396399	0.0843	-3.09	1112.68
55175	kelch like family member 11	KLHL11	-0.26	0.00589	0.065904	0.0945	-2.75	1684.52
159	adenylosuccinate synthase 2	ADSS2	-0.26	0.0074	0.0726881	0.097	-2.68	1487.45
9677	diphosphoinositol pentakisphosphate kinase 1	PPIP5K1	-0.26	0.00902	0.0788921	0.0997	-2.61	3266.48
81929	SEH1 like nucleoporin	SEH1L	-0.26	0.00906	0.0790495	0.0998	-2.61	1777.85
59349	kelch like family member 12	KLHL12	-0.26	0.0102	0.0835681	0.101	-2.57	1759.24
1845	dual specificity phosphatase 3	DUSP3	-0.26	0.0126	0.0917966	0.1041	-2.49	7296.4
53354	pantothenate kinase 1	PANK1	-0.26	0.0154	0.100718	0.1072	-2.42	470.74
55083	kinesin family member 26B	KIF26B	-0.26	0.0205	0.115861	0.112	-2.32	1014.47
2982	guanylate cyclase 1 soluble subunit alpha 1	GUCY1A1	-0.26	0.0319	0.143035	0.1211	-2.15	2998.56
4208	myocyte enhancer factor 2C	MEF2C	-0.26	0.0705	0.212381	0.1438	-1.81	16936.4
5179	proenkephalin	PENK	-0.26	0.105	0.26353	0.1605	-1.62	112.77
5924	Ras protein specific guanine nucleotide releasing factor 2	RASGRF2	-0.26	0.114	0.276895	0.1646	-1.58	3902.61
1414	crystallin beta B1	CRYBB1	-0.26	0.116	0.280128	0.1653	-1.57	29.69
400617	KCNJ2 antisense RNA 1	KCNJ2-AS1	-0.26	0.134	0.30506	0.1736	-1.5	82.87
102724934	uncharacterized LOC102724934	LOC102724934	-0.26	0.0594	0.193877	0.1377	-1.89	108.28
105376121	uncharacterized LOC105376121	LOC105376121	-0.26	0.0653	0.203846	0.1409	-1.84	88.83
10333	toll like receptor 6	TLR6	-0.26	0.234	0.428787	0.2182	-1.19	38.67
28969	basic leucine zipper and W2 domains 2	BZW2	-0.259	0.00398	0.0551142	0.0898	-2.88	542.85
8678	beclin 1	BECN1	-0.259	0.00582	0.0655371	0.0941	-2.76	1422.86
57614	RAB11 binding and LisH domain, coiled-coil and HEAT repeat containing	RELCH	-0.259	0.00628	0.0676226	0.0949	-2.73	1913.57
344595	DPPA2 upstream binding RNA	DUBR	-0.259	0.00787	0.0741689	0.0976	-2.66	315.9
1778	dynein cytoplasmic 1 heavy chain 1	DYNC1H1	-0.259	0.0165	0.104266	0.1081	-2.4	51051.2
26049	family with sequence similarity 169 member A	FAM169A	-0.259	0.026	0.129249	0.1166	-2.23	1723.34
79873	nudix hydrolase 18	NUDT18	-0.259	0.0273	0.132288	0.1172	-2.21	516.54
808	calmodulin 3	CALM3	-0.259	0.0415	0.162354	0.1271	-2.04	79302.7
492	ATPase plasma membrane Ca2+ transporting 3	ATP2B3	-0.259	0.0439	0.166836	0.1284	-2.02	6678.59
8825	lin-7 homolog A, crumbs cell polarity complex component	LIN7A	-0.259	0.0638	0.201451	0.1398	-1.85	1525.84
54551	MAGE family member L2	MAGEL2	-0.259	0.0647	0.202984	0.1402	-1.85	448.97
6326	sodium voltage-gated channel alpha subunit 2	SCN2A	-0.259	0.0776	0.223438	0.1468	-1.76	15361.6
7091	TLE family member 4, transcriptional corepressor	TLE4	-0.259	0.0824	0.231161	0.149	-1.74	2461.3
100874159	long intergenic non-protein coding RNA 400	LINC00400	-0.259	0.0462	0.171148	0.13	-1.99	34.34
152742	long intergenic non-protein coding RNA 1085	LINC01085	-0.259	0.13	0.299362	0.1708	-1.51	18.49
338773	transmembrane protein 119	TMEM119	-0.259	0.404	0.598571	0.3099	-0.835	112.82
8835	suppressor of cytokine signaling 2	SOCS2	-0.258	0.00147	0.0344609	0.0812	-3.18	265.56
29035	HUWE1 associated protein modifying stress responses	HAPSTR1	-0.258	0.0027	0.0455488	0.0859	-3	4367.27
92737	delta/notch like EGF repeat containing	DNER	-0.258	0.00411	0.0559257	0.0901	-2.87	7568.54
23341	DnaJ heat shock protein family (Hsp40) member C16	DNAJC16	-0.258	0.0048	0.0606226	0.0915	-2.82	1165.41
113802	HEN methyltransferase 1	HENMT1	-0.258	0.00907	0.0790495	0.099	-2.61	341.46
23065	ER membrane protein complex subunit 1	EMC1	-0.258	0.0103	0.0839819	0.1007	-2.56	3212.64
100132103	family with sequence similarity 66 member E	FAM66E	-0.258	0.0125	0.0915066	0.1033	-2.5	97.45
552889	ataxin 7 like 3B	ATXN7L3B	-0.258	0.0211	0.117647	0.1119	-2.31	8456.45
10927	spindlin 1	SPIN1	-0.258	0.0266	0.130627	0.1163	-2.22	8960.28
89795	neuron navigator 3	NAV3	-0.258	0.0348	0.149204	0.1225	-2.11	4040.86
100128264	HTR5A antisense RNA 1	HTR5A-AS1	-0.258	0.0766	0.222084	0.1457	-1.77	460.14
1718	24-dehydrocholesterol reductase	DHCR24	-0.258	0.103	0.260168	0.1579	-1.63	18663.9
5218	cyclin dependent kinase 14	CDK14	-0.258	0.111	0.27281	0.1619	-1.59	5484.38
101928357	uncharacterized LOC101928357	LOC101928357	-0.258	0.0856	0.235861	0.1504	-1.72	76.15
105376095	uncharacterized LOC105376095	LOC105376095	-0.258	0.0343	0.148009	0.122	-2.12	270.48
107984661	uncharacterized LOC107984661	LOC107984661	-0.258	0.0599	0.19472	0.1369	-1.88	1637.87
793	calbindin 1	CALB1	-0.258	0.179	0.363037	0.192	-1.34	863.39
6997	teratocarcinoma-derived growth factor 1	TDGF1	-0.258	0.305	0.502582	0.2517	-1.03	19.95
11006	leukocyte immunoglobulin like receptor B4	LILRB4	-0.258	0.343	0.542411	0.2727	-0.948	130.72
262	adenosylmethionine decarboxylase 1	AMD1	-0.257	0.00974	0.0817277	0.0994	-2.59	3481.81
23173	methionyl aminopeptidase 1	METAP1	-0.257	0.0108	0.0856605	0.1009	-2.55	1247.13
284656	EPH receptor A10	EPHA10	-0.257	0.0118	0.0886039	0.1018	-2.52	2115.22
10678	UDP-GlcNAc:betaGal beta-1,3-N-acetylglucosaminyltransferase 2	B3GNT2	-0.257	0.0138	0.0959264	0.1043	-2.46	459.54
114791	tubulin gamma complex associated protein 5	TUBGCP5	-0.257	0.0167	0.104881	0.1075	-2.39	987.48
10097	actin related protein 2	ACTR2	-0.257	0.0168	0.105153	0.1075	-2.39	8828.85
51571	CYFIP related Rac1 interactor B	CYRIB	-0.257	0.0197	0.113769	0.1101	-2.33	2437.38
142940	TruB pseudouridine synthase family member 1	TRUB1	-0.257	0.0321	0.14338	0.1199	-2.14	1173.25
4952	OCRL inositol polyphosphate-5-phosphatase	OCRL	-0.257	0.0362	0.152168	0.1227	-2.09	2944.76
23507	leucine rich repeat containing 8 VRAC subunit B	LRRC8B	-0.257	0.0504	0.17944	0.1315	-1.96	5307.48
57574	membrane associated ring-CH-type finger 4	MARCHF4	-0.257	0.051	0.180289	0.1317	-1.95	1431.12
5923	Ras protein specific guanine nucleotide releasing factor 1	RASGRF1	-0.257	0.0578	0.191327	0.1356	-1.9	9796.57
1132	cholinergic receptor muscarinic 4	CHRM4	-0.257	0.0751	0.219606	0.1445	-1.78	1360.19
100874074	DLEU7 antisense RNA 1	DLEU7-AS1	-0.257	0.104	0.261945	0.1578	-1.63	19.48
105378519	uncharacterized LOC105378519	LOC105378519	-0.257	0.00835	0.0763487	0.0974	-2.64	40.86
176	aggrecan	ACAN	-0.257	0.151	0.326339	0.1789	-1.44	151.79
54518	amyloid beta precursor protein binding family B member 1 interacting protein	APBB1IP	-0.257	0.262	0.45952	0.2294	-1.12	133.91
963	CD53 molecule	CD53	-0.257	0.278	0.475614	0.2373	-1.08	132.52
63917	polypeptide N-acetylgalactosaminyltransferase 11	GALNT11	-0.256	0.007	0.0704794	0.0949	-2.7	3157.81
5172	solute carrier family 26 member 4	SLC26A4	-0.256	0.013	0.093048	0.1031	-2.48	512.6
9737	G protein-coupled receptor associated sorting protein 1	GPRASP1	-0.256	0.0234	0.123798	0.1129	-2.27	9172.23
7275	TUB bipartite transcription factor	TUB	-0.256	0.0364	0.152658	0.1221	-2.09	6050.23
100847042	microRNA 5572	MIR5572	-0.256	0.0399	0.159375	0.1243	-2.06	141.16
6586	slit guidance ligand 3	SLIT3	-0.256	0.0662	0.205554	0.1392	-1.84	4401.64
93474	zinc finger protein 670	ZNF670	-0.256	0.0753	0.220248	0.1441	-1.78	168.5
100422914	microRNA 4253	MIR4253	-0.256	0.112	0.273784	0.1608	-1.59	29.93
340419	R-spondin 2	RSPO2	-0.256	0.115	0.278956	0.1626	-1.58	744.03
107985194	long intergenic non-protein coding RNA 2798	LINC02798	-0.256	0.0296	0.137522	0.1178	-2.18	180.76
102724265	long intergenic non-protein coding RNA 2953	LINC02953	-0.256	0.343	0.5415	0.2693	-0.949	14.87
102724593	uncharacterized LOC102724593	LOC102724593	-0.256	0.109	0.269146	0.1598	-1.6	342.17
10218	angiopoietin like 7	ANGPTL7	-0.256	0.219	0.412641	0.2086	-1.23	13.78
5641	legumain	LGMN	-0.255	0.0057	0.065002	0.0922	-2.76	1423.06
10531	pitrilysin metallopeptidase 1	PITRM1	-0.255	0.00834	0.0762798	0.0967	-2.64	3272.06
57478	ubiquitin specific peptidase 31	USP31	-0.255	0.0146	0.0982262	0.1043	-2.44	2934.77
22881	ankyrin repeat domain 6	ANKRD6	-0.255	0.0163	0.103633	0.1062	-2.4	1582.15
132204	synaptoporin	SYNPR	-0.255	0.0193	0.112533	0.1092	-2.34	4395.68
5230	phosphoglycerate kinase 1	PGK1	-0.255	0.021	0.117254	0.1104	-2.31	10269.8
3845	KRAS proto-oncogene, GTPase	KRAS	-0.255	0.0212	0.117745	0.1106	-2.31	2632.87
100126784	NAV2 antisense RNA 6	NAV2-AS6	-0.255	0.0212	0.117944	0.1108	-2.3	823.54
57559	STAM binding protein like 1	STAMBPL1	-0.255	0.0354	0.150649	0.1212	-2.1	538.16
203197	transmembrane protein 268	TMEM268	-0.255	0.0376	0.155032	0.1225	-2.08	3202.35
5274	serpin family I member 1	SERPINI1	-0.255	0.0419	0.163048	0.1251	-2.03	6924.84
3739	potassium voltage-gated channel subfamily A member 4	KCNA4	-0.255	0.0436	0.16627	0.1264	-2.02	462.9
55531	ELMO domain containing 1	ELMOD1	-0.255	0.0461	0.171045	0.1277	-1.99	3743.4
594855	complexin 3	CPLX3	-0.255	0.0523	0.182096	0.1316	-1.94	820.58
100873921	SYP antisense RNA 1	SYP-AS1	-0.255	0.0545	0.185494	0.1325	-1.92	400.94
26050	SLIT and NTRK like family member 5	SLITRK5	-0.255	0.067	0.206646	0.1393	-1.83	2902.95
9783	regulating synaptic membrane exocytosis 3	RIMS3	-0.255	0.0678	0.208153	0.1396	-1.83	21966
127703	chromosome 1 open reading frame 216	C1orf216	-0.255	0.125	0.292973	0.1663	-1.53	8548.48
105378385	long intergenic non-protein coding RNA 2679	LINC02679	-0.255	0.19	0.378314	0.1951	-1.31	11
441204	long intergenic non-protein coding RNA 2981	LINC02981	-0.255	0.183	0.369222	0.1915	-1.33	755.71
105369614		LOC105369614	-0.255	0.0183	0.109685	0.1079	-2.36	46.31
105370067	uncharacterized LOC105370067	LOC105370067	-0.255	0.178	0.362051	0.1891	-1.35	35.18
105377647	uncharacterized LOC105377647	LOC105377647	-0.255	0.145	0.318769	0.175	-1.46	10.53
5007	oxysterol binding protein	OSBP	-0.254	0.00384	0.0543387	0.0878	-2.89	2291.06
7474	Wnt family member 5A	WNT5A	-0.254	0.00493	0.061392	0.0904	-2.81	257.51
51256	TBC1 domain family member 7	TBC1D7	-0.254	0.00681	0.0696232	0.0939	-2.71	183.76
7803	protein tyrosine phosphatase 4A1	PTP4A1	-0.254	0.0105	0.0844359	0.099	-2.56	3307.23
23235	salt inducible kinase 2	SIK2	-0.254	0.0125	0.0914899	0.1015	-2.5	4478.49
5494	protein phosphatase, Mg2+/Mn2+ dependent 1A	PPM1A	-0.254	0.0144	0.0976766	0.1039	-2.45	4735.6
9900	synaptic vesicle glycoprotein 2A	SV2A	-0.254	0.0187	0.111055	0.1079	-2.35	34152.6
3738	potassium voltage-gated channel subfamily A member 3	KCNA3	-0.254	0.0189	0.111574	0.1081	-2.35	1322.44
54914	focadhesin	FOCAD	-0.254	0.0259	0.129207	0.1139	-2.23	2818.44
57180	actin related protein 3B	ACTR3B	-0.254	0.0274	0.132434	0.115	-2.21	2100.6
6252	reticulon 1	RTN1	-0.254	0.0373	0.154711	0.122	-2.08	35477.7
84302	post-GPI attachment to proteins GalNAc transferase 4	PGAP4	-0.254	0.0393	0.158024	0.1232	-2.06	5579.04
145773	family with sequence similarity 81 member A	FAM81A	-0.254	0.0445	0.16829	0.1262	-2.01	1917.35
10769	polo like kinase 2	PLK2	-0.254	0.0488	0.176582	0.129	-1.97	3020.05
693140	microRNA 555	MIR555	-0.254	0.0528	0.182952	0.1312	-1.94	138.03
219749	zinc finger protein 25	ZNF25	-0.254	0.0565	0.189036	0.1334	-1.91	2533.74
273	amphiphysin	AMPH	-0.254	0.0875	0.238677	0.1484	-1.71	7880.94
55118	cartilage acidic protein 1	CRTAC1	-0.254	0.0943	0.248577	0.1515	-1.67	2389.53
105370774	uncharacterized LOC105370774	LOC105370774	-0.254	0.0117	0.088538	0.1007	-2.52	74.48
105375350	uncharacterized LOC105375350	LOC105375350	-0.254	0.0646	0.202984	0.1373	-1.85	369.66
54360	cytokine like 1	CYTL1	-0.254	0.24	0.436166	0.2158	-1.17	15.42
5383	PMS1 homolog 2, mismatch repair system component pseudogene 5	PMS2P5	-0.253	0.00202	0.039604	0.0818	-3.09	266.66
58155	polypyrimidine tract binding protein 2	PTBP2	-0.253	0.00446	0.0586503	0.089	-2.84	1432.98
7416	voltage dependent anion channel 1	VDAC1	-0.253	0.00632	0.0677326	0.0926	-2.73	5780.07
55187	vacuolar protein sorting 13 homolog D	VPS13D	-0.253	0.00662	0.0689627	0.093	-2.72	6355.45
1657	Dmx like 1	DMXL1	-0.253	0.0177	0.108176	0.1066	-2.37	2369.29
57451	teneurin transmembrane protein 2	TENM2	-0.253	0.0206	0.116103	0.1094	-2.32	4843.45
344787	zinc finger protein 860	ZNF860	-0.253	0.0276	0.132971	0.1151	-2.2	55.6
23108	RAP1 GTPase activating protein 2	RAP1GAP2	-0.253	0.0355	0.150737	0.1202	-2.1	10350.4
100130311	chromosome 17 open reading frame 107	C17orf107	-0.253	0.0698	0.211142	0.1393	-1.81	358.95
641467	TSC22D1 antisense RNA 1	TSC22D1-AS1	-0.253	0.0726	0.215801	0.1407	-1.8	709.04
102724663	PPFIA2 antisense RNA 1	PPFIA2-AS1	-0.253	0.117	0.281689	0.1616	-1.57	25.18
375295	long intergenic non-protein coding RNA 1116	LINC01116	-0.253	0.213	0.404591	0.203	-1.25	21.98
105375740	uncharacterized LOC105375740	LOC105375740	-0.253	0.00633	0.0677715	0.0928	-2.73	136.6
9871	SEC24 homolog D, COPII coat complex component	SEC24D	-0.252	0.00769	0.073543	0.0944	-2.67	552.31
2926	G-rich RNA sequence binding factor 1	GRSF1	-0.252	0.00977	0.0818284	0.0977	-2.58	3966.56
143187	vesicle transport through interaction with t-SNAREs 1A	VTI1A	-0.252	0.0132	0.0937856	0.1015	-2.48	566.86
10090	uronyl 2-sulfotransferase	UST	-0.252	0.0177	0.108327	0.1061	-2.37	554.99
1400	collapsin response mediator protein 1	CRMP1	-0.252	0.0228	0.122117	0.1106	-2.28	6635.24
3680	integrin subunit alpha 9	ITGA9	-0.252	0.0235	0.12392	0.1112	-2.27	598.45
9673	solute carrier family 25 member 44	SLC25A44	-0.252	0.0312	0.141299	0.1168	-2.15	5028.66
152330	contactin 4	CNTN4	-0.252	0.0362	0.152288	0.1205	-2.09	1503.3
4345	CD200 molecule	CD200	-0.252	0.044	0.167123	0.1251	-2.01	3524.73
5550	prolyl endopeptidase	PREP	-0.252	0.0488	0.176582	0.1281	-1.97	1379.95
9715	family with sequence similarity 131 member B	FAM131B	-0.252	0.0509	0.180141	0.1292	-1.95	10372.4
283948	NHL repeat containing 4	NHLRC4	-0.252	0.0519	0.181699	0.1295	-1.94	24.79
54798	dachsous cadherin-related 2	DCHS2	-0.252	0.0613	0.197012	0.1346	-1.87	804.38
392490	replaced by ID 340527	FLJ44635	-0.252	0.07	0.211617	0.1391	-1.81	19.2
692159	TAMALIN antisense RNA 1	TAMALIN-AS1	-0.252	0.0782	0.224301	0.1432	-1.76	163.23
23596	opsin 3	OPN3	-0.252	0.0911	0.243887	0.149	-1.69	776.64
9495	A-kinase anchoring protein 5	AKAP5	-0.252	0.101	0.257719	0.1533	-1.64	1715.78
102724642	anaphase-promoting complex subunit 1-like	LOC102724642	-0.252	0.054	0.184578	0.1305	-1.93	143.65
105372007	uncharacterized LOC105372007	LOC105372007	-0.252	0.162	0.340968	0.1799	-1.4	16.31
105375896		LOC105375896	-0.252	0.252	0.447826	0.2202	-1.15	11.05
92345	nuclear assembly factor 1 ribonucleoprotein	NAF1	-0.251	0.00809	0.0749128	0.0949	-2.65	762.36
4719	NADH:ubiquinone oxidoreductase core subunit S1	NDUFS1	-0.251	0.00876	0.0780426	0.0956	-2.62	7736.72
4763	neurofibromin 1	NF1	-0.251	0.0204	0.11571	0.1081	-2.32	5860.5
57502	neuroligin 4 X-linked	NLGN4X	-0.251	0.0259	0.129248	0.1126	-2.23	2274.2
8708	beta-1,3-galactosyltransferase 1	B3GALT1	-0.251	0.0283	0.134531	0.1144	-2.19	207.48
57464	striatin interacting protein 2	STRIP2	-0.251	0.033	0.145443	0.1179	-2.13	623.42
3656	interleukin 1 receptor associated kinase 2	IRAK2	-0.251	0.0376	0.154978	0.1206	-2.08	261.2
80059	leucine rich repeat transmembrane neuronal 4	LRRTM4	-0.251	0.0406	0.160602	0.1225	-2.05	919.12
7222	transient receptor potential cation channel subfamily C member 3	TRPC3	-0.251	0.0435	0.166233	0.1243	-2.02	140.08
253962	CACNA1G antisense RNA 1	CACNA1G-AS1	-0.251	0.0691	0.21009	0.1383	-1.82	33.92
100533181	FXYD6-FXYD2 readthrough	FXYD6-FXYD2	-0.251	0.0691	0.21003	0.1379	-1.82	4732.02
3760	potassium inwardly rectifying channel subfamily J member 3	KCNJ3	-0.251	0.0719	0.21453	0.1392	-1.8	3172.4
10716	T-box brain transcription factor 1	TBR1	-0.251	0.0808	0.228495	0.1437	-1.75	3710.41
11001	solute carrier family 27 member 2	SLC27A2	-0.251	0.104	0.261693	0.1542	-1.63	109.98
101926975	long intergenic non-protein coding RNA 1844	LINC01844	-0.251	0.0155	0.100763	0.1035	-2.42	47.96
150967	long intergenic non-protein coding RNA 1963	LINC01963	-0.251	0.0398	0.159196	0.1223	-2.06	3385.87
101928371	uncharacterized LOC101928371	LOC101928371	-0.251	0.0249	0.126867	0.1117	-2.24	67.95
105375131	uncharacterized LOC105375131	LOC105375131	-0.251	0.16	0.338384	0.1786	-1.41	18.41
105377208	uncharacterized LOC105377208	LOC105377208	-0.251	0.127	0.295126	0.1641	-1.53	37.25
59352	leucine rich repeat containing G protein-coupled receptor 6	LGR6	-0.251	0.16	0.337948	0.1785	-1.41	60.62
197342	essential meiotic structure-specific endonuclease subunit 2	EME2	-0.251	0.172	0.355041	0.1842	-1.36	780.08
3350	5-hydroxytryptamine receptor 1A	HTR1A	-0.251	0.231	0.426436	0.2094	-1.2	432.76
100506540	mitochondrial sheath formation associated	MISFA	-0.25	0.0046	0.0594219	0.0882	-2.83	54.53
26190	F-box and WD repeat domain containing 2	FBXW2	-0.25	0.00528	0.0628525	0.0898	-2.79	2479.76
201595	STT3 oligosaccharyltransferase complex catalytic subunit B	STT3B	-0.25	0.00829	0.076015	0.0948	-2.64	2228.21
1810	down-regulator of transcription 1	DR1	-0.25	0.00835	0.0763487	0.0949	-2.64	1740.9
7257	translin associated factor X	TSNAX	-0.25	0.00992	0.082398	0.0968	-2.58	974.29
100129620	PLPPR5 antisense RNA 1	PLPPR5-AS1	-0.25	0.0245	0.125837	0.1111	-2.25	68.01
3754	potassium voltage-gated channel modifier subfamily F member 1	KCNF1	-0.25	0.0292	0.136577	0.1147	-2.18	5793.83
10947	adaptor related protein complex 3 subunit mu 2	AP3M2	-0.25	0.0356	0.150982	0.1188	-2.1	3071.58
5594	mitogen-activated protein kinase 1	MAPK1	-0.25	0.0536	0.184238	0.1297	-1.93	20943.3
5588	protein kinase C theta	PRKCQ	-0.25	0.0644	0.202584	0.1354	-1.85	360.44
57705	WDFY family member 4	WDFY4	-0.25	0.144	0.318022	0.1711	-1.46	176.52
101928692	uncharacterized LOC101928692	LOC101928692	-0.25	0.125	0.292383	0.1626	-1.53	15.96
105371737	uncharacterized LOC105371737	LOC105371737	-0.25	0.0187	0.110856	0.1063	-2.35	131.68
27201	G protein-coupled receptor 78	GPR78	-0.25	0.314	0.513309	0.2483	-1.01	80.31
8287	ubiquitin specific peptidase 9 Y-linked	USP9Y	-0.25	0.569	0.733151	0.4384	-0.57	1901.65
80267	ER degradation enhancing alpha-mannosidase like protein 3	EDEM3	-0.249	0.00633	0.0677715	0.0913	-2.73	1437.04
830	capping actin protein of muscle Z-line subunit alpha 2	CAPZA2	-0.249	0.0125	0.0913449	0.0997	-2.5	2074.94
100302182	microRNA 1279	MIR1279	-0.249	0.018	0.109066	0.1054	-2.36	30.9
23420	NODAL modulator 1	NOMO1	-0.249	0.0242	0.125062	0.1107	-2.25	6502.75
157567	ankyrin repeat domain 46	ANKRD46	-0.249	0.0303	0.139224	0.115	-2.17	2335.33
84912	solute carrier family 35 member B4	SLC35B4	-0.249	0.0312	0.141299	0.1158	-2.15	2656.81
91683	synaptotagmin 12	SYT12	-0.249	0.0371	0.15433	0.1193	-2.08	4204.41
56990	CDC42 small effector 2	CDC42SE2	-0.249	0.0382	0.155808	0.1203	-2.07	3238.92
283820	NODAL modulator 2	NOMO2	-0.249	0.0405	0.160375	0.1215	-2.05	6713.27
51454	GULP PTB domain containing engulfment adaptor 1	GULP1	-0.249	0.0512	0.180389	0.1275	-1.95	530.74
9331	beta-1,4-galactosyltransferase 6	B4GALT6	-0.249	0.0529	0.18308	0.1286	-1.94	2603.93
55613	myotubularin related protein 8	MTMR8	-0.249	0.0864	0.237007	0.1453	-1.71	23.22
654466	fibroblast growth factor 7 pseudogene 3	FGF7P3	-0.249	0.106	0.26534	0.1539	-1.62	360.3
129804	fibulin 7	FBLN7	-0.249	0.123	0.289212	0.1611	-1.54	842.28
107984260	uncharacterized LOC107984260	LOC107984260	-0.249	0.165	0.344539	0.1789	-1.39	22.04
6001	regulator of G protein signaling 10	RGS10	-0.249	0.246	0.442649	0.2146	-1.16	41.38
100506840	IQ motif containing F4, pseudogene	IQCF4P	-0.249	0.254	0.449905	0.2184	-1.14	10.4
83891	sorting nexin 25	SNX25	-0.248	0.00159	0.0356681	0.0785	-3.16	890.93
6119	replication protein A3	RPA3	-0.248	0.00414	0.0561257	0.0864	-2.87	149.2
100128890	family with sequence similarity 66 member B	FAM66B	-0.248	0.00783	0.0740933	0.0932	-2.66	284.17
1808	dihydropyrimidinase like 2	DPYSL2	-0.248	0.00811	0.0750783	0.0938	-2.65	33213.7
4094	MAF bZIP transcription factor	MAF	-0.248	0.0102	0.0835681	0.0964	-2.57	1956.55
54928	3'(2'), 5'-bisphosphate nucleotidase 2	BPNT2	-0.248	0.0107	0.0852319	0.0971	-2.55	4499.24
54664	transmembrane protein 106B	TMEM106B	-0.248	0.025	0.127262	0.1104	-2.24	2824
140733	mono-ADP ribosylhydrolase 2	MACROD2	-0.248	0.0264	0.130217	0.1118	-2.22	1077.86
30849	phosphoinositide-3-kinase regulatory subunit 4	PIK3R4	-0.248	0.0279	0.13341	0.1127	-2.2	1212.62
114548	NLR family pyrin domain containing 3	NLRP3	-0.248	0.0417	0.162812	0.1217	-2.04	109.04
101927051	PDXP divergent transcript	PDXP-DT	-0.248	0.0492	0.17734	0.1263	-1.97	212.99
4254	KIT ligand	KITLG	-0.248	0.0947	0.249025	0.1483	-1.67	1152.18
6751	somatostatin receptor 1	SSTR1	-0.248	0.138	0.310253	0.1674	-1.48	2792.83
2897	glutamate ionotropic receptor kainate type subunit 1	GRIK1	-0.247	0.00358	0.052682	0.0849	-2.91	662.35
8518	elongator acetyltransferase complex subunit 1	ELP1	-0.247	0.00524	0.0626266	0.0884	-2.79	1979.3
4363	ATP binding cassette subfamily C member 1	ABCC1	-0.247	0.00662	0.0689627	0.091	-2.72	899.21
56061	ubiquitin family domain containing 1	UBFD1	-0.247	0.00781	0.0740933	0.0928	-2.66	2383.68
79963	ATP binding cassette subfamily A member 11, pseudogene	ABCA11P	-0.247	0.0149	0.0988393	0.1014	-2.44	261.74
5910	Rap1 GTPase-GDP dissociation stimulator 1	RAP1GDS1	-0.247	0.0213	0.118057	0.1071	-2.3	4059.85
26115	tetratricopeptide repeat, ankyrin repeat and coiled-coil containing 2	TANC2	-0.247	0.0219	0.119903	0.1078	-2.29	6405.29
23530	nicotinamide nucleotide transhydrogenase	NNT	-0.247	0.0232	0.123309	0.1086	-2.27	4476.71
56895	1-acylglycerol-3-phosphate O-acyltransferase 4	AGPAT4	-0.247	0.0237	0.124298	0.1092	-2.26	2932.89
1894	epithelial cell transforming 2	ECT2	-0.247	0.0256	0.128671	0.1108	-2.23	305.23
22849	cytoplasmic polyadenylation element binding protein 3	CPEB3	-0.247	0.0341	0.14753	0.1166	-2.12	3366.82
114882	oxysterol binding protein like 8	OSBPL8	-0.247	0.0471	0.172993	0.1245	-1.99	3998.99
79762	chromosome 1 open reading frame 115	C1orf115	-0.247	0.0544	0.185494	0.1286	-1.92	9270.12
3423	iduronate 2-sulfatase	IDS	-0.247	0.0839	0.233494	0.1429	-1.73	99232
105369528	long intergenic non-protein coding RNA 2744	LINC02744	-0.247	0.37	0.567173	0.2758	-0.897	12.06
102723996	ICOS ligand	LOC102723996	-0.247	0.374	0.571483	0.2786	-0.888	671.57
107984262	uncharacterized LOC107984262	LOC107984262	-0.247	0.18	0.364636	0.1843	-1.34	12.27
100130449	GPC1 antisense RNA 1	GPC1-AS1	-0.247	0.149	0.324511	0.1713	-1.44	319.7
116443	glutamate ionotropic receptor NMDA type subunit 3A	GRIN3A	-0.247	0.17	0.351716	0.18	-1.37	1816.38
6503	Src like adaptor	SLA	-0.247	0.18	0.364362	0.1838	-1.34	631.58
403323	lncRNA negative regulator of fibroblast-like synoviocyte migration, SYNCRIP interacting	LERFS	-0.247	0.372	0.569058	0.2768	-0.893	52.03
28977	mitochondrial ribosomal protein L42	MRPL42	-0.246	0.00629	0.0676279	0.09	-2.73	2665.4
51263	mitochondrial ribosomal protein L30	MRPL30	-0.246	0.00667	0.0691223	0.0907	-2.71	1034.63
56852	RAD18 E3 ubiquitin protein ligase	RAD18	-0.246	0.0127	0.0918793	0.0986	-2.49	202.79
9847	C2 calcium dependent domain containing 5	C2CD5	-0.246	0.0172	0.106626	0.1033	-2.38	1755.63
154810	angiomotin like 1	AMOTL1	-0.246	0.0238	0.124424	0.1087	-2.26	2246.47
2781	G protein subunit alpha z	GNAZ	-0.246	0.027	0.131449	0.1113	-2.21	6315.63
54495	thioredoxin related transmembrane protein 3	TMX3	-0.246	0.027	0.131454	0.1114	-2.21	1736.34
89866	SEC16 homolog B, endoplasmic reticulum export factor	SEC16B	-0.246	0.0306	0.140146	0.1137	-2.16	209.53
401509	zinc finger protein 658B (pseudogene)	ZNF658B	-0.246	0.0361	0.152102	0.1175	-2.1	155.55
54778	ring finger protein 111	RNF111	-0.246	0.0382	0.155808	0.1188	-2.07	1874.69
3897	L1 cell adhesion molecule	L1CAM	-0.246	0.0822	0.230717	0.1417	-1.74	19578.7
2070	EYA transcriptional coactivator and phosphatase 4	EYA4	-0.246	0.0846	0.234458	0.1425	-1.72	111.38
91614	DEP domain containing 7	DEPDC7	-0.246	0.245	0.441109	0.2114	-1.16	43.02
84816	reticulon 4 interacting protein 1	RTN4IP1	-0.245	0.00105	0.029823	0.0747	-3.28	211.07
110006325	PPIP5K1P1-CATSPER2 readthrough	PPIP5K1P1-CATSPER2	-0.245	0.00271	0.0455525	0.0816	-3	1503.34
440	asparagine synthetase (glutamine-hydrolyzing)	ASNS	-0.245	0.00529	0.0628592	0.0879	-2.79	1141.22
127544	ring finger protein 19B	RNF19B	-0.245	0.00865	0.0777658	0.0933	-2.63	1081.88
51603	methyltransferase 13, eEF1A lysine and N-terminal methyltransferase	METTL13	-0.245	0.00932	0.0800015	0.0943	-2.6	1380.34
7342	upstream binding protein 1	UBP1	-0.245	0.0137	0.0955333	0.0995	-2.47	2373.91
50484	ribonucleotide reductase regulatory TP53 inducible subunit M2B	RRM2B	-0.245	0.0183	0.109685	0.1039	-2.36	1055.41
101929680	SCN1A and SCN9A antisense RNA 1	SCN1A-AS1	-0.245	0.0211	0.117647	0.1062	-2.31	63.51
57102	chromosome 12 open reading frame 4	C12orf4	-0.245	0.0233	0.123567	0.1078	-2.27	603.33
26032	sushi domain containing 5	SUSD5	-0.245	0.0256	0.128714	0.1098	-2.23	876.27
9645	microtubule associated monooxygenase, calponin and LIM domain containing 2	MICAL2	-0.245	0.0296	0.137522	0.1127	-2.18	8530.27
374383	natural killer cell cytotoxicity receptor 3 ligand 1	NCR3LG1	-0.245	0.0321	0.143403	0.1143	-2.14	1070.94
11191	phosphatase and tensin homolog pseudogene 1	PTENP1	-0.245	0.0342	0.147851	0.1157	-2.12	213.23
56123	protocadherin beta 13	PCDHB13	-0.245	0.0359	0.151419	0.1169	-2.1	185.86
79772	multiple C2 and transmembrane domain containing 1	MCTP1	-0.245	0.0438	0.166796	0.1213	-2.02	2416.96
51440	hippocalcin like 4	HPCAL4	-0.245	0.0561	0.188656	0.1283	-1.91	19053.9
102465519	microRNA 6861	MIR6861	-0.245	0.0568	0.1894	0.1286	-1.91	201.64
124359	chromodomain Y like 2	CDYL2	-0.245	0.0592	0.193734	0.13	-1.89	2175.14
150538	SATB2 antisense RNA 1	SATB2-AS1	-0.245	0.0627	0.199371	0.1318	-1.86	176.18
54809	sterile alpha motif domain containing 9	SAMD9	-0.245	0.0696	0.210843	0.1352	-1.81	105.39
101927249	PDZRN3 antisense RNA 1	PDZRN3-AS1	-0.245	0.09	0.241845	0.1446	-1.7	51.14
654429	leucine rich repeats and transmembrane domains 2	LRTM2	-0.245	0.0938	0.247774	0.1462	-1.68	3387.65
84634	KISS1 receptor	KISS1R	-0.245	0.229	0.423801	0.2039	-1.2	80.3
2705	gap junction protein beta 1	GJB1	-0.245	0.412	0.606396	0.299	-0.82	1141.5
112487	D-aminoacyl-tRNA deacylase 2	DTD2	-0.244	0.00111	0.030355	0.0749	-3.26	448.53
7077	TIMP metallopeptidase inhibitor 2	TIMP2	-0.244	0.00877	0.0780426	0.0932	-2.62	12876.6
85369	striatin interacting protein 1	STRIP1	-0.244	0.0101	0.0832665	0.0948	-2.57	2483.31
57498	kinase D interacting substrate 220	KIDINS220	-0.244	0.0103	0.083923	0.0949	-2.57	10101.9
6942	transcription factor 20	TCF20	-0.244	0.0128	0.0923074	0.0982	-2.49	2922.58
5686	proteasome 20S subunit alpha 5	PSMA5	-0.244	0.0149	0.0989085	0.1002	-2.44	1364.69
54536	exocyst complex component 6	EXOC6	-0.244	0.0183	0.109685	0.1034	-2.36	747.56
6612	small ubiquitin like modifier 3	SUMO3	-0.244	0.0221	0.120386	0.1066	-2.29	2630.89
8900	cyclin A1	CCNA1	-0.244	0.0222	0.120469	0.1065	-2.29	495.55
100131897	inhibitory synaptic factor family member 2B	INSYN2B	-0.244	0.0234	0.123868	0.1076	-2.27	493.47
23284	adhesion G protein-coupled receptor L3	ADGRL3	-0.244	0.0257	0.1288	0.1094	-2.23	4389.93
2237	flap structure-specific endonuclease 1	FEN1	-0.244	0.0278	0.133349	0.1108	-2.2	535.63
286205	suppressor of cancer cell invasion	SCAI	-0.244	0.0296	0.137617	0.112	-2.18	3715.23
55061	sushi domain containing 4	SUSD4	-0.244	0.0365	0.15284	0.1166	-2.09	2562.45
55500	ethanolamine kinase 1	ETNK1	-0.244	0.0422	0.163623	0.1201	-2.03	2664.59
309	annexin A6	ANXA6	-0.244	0.0431	0.165356	0.1205	-2.02	10846.3
261729	STEAP2 metalloreductase	STEAP2	-0.244	0.0438	0.166611	0.1209	-2.02	2254.22
221091	LRRN4 C-terminal like	LRRN4CL	-0.244	0.0871	0.238047	0.1429	-1.71	24.92
222008	V-set and transmembrane domain containing 2A	VSTM2A	-0.244	0.105	0.263859	0.1503	-1.62	3144.89
102724723	uncharacterized LOC102724723	LOC102724723	-0.244	0.0924	0.245978	0.1449	-1.68	41.1
79150	uncharacterized LOC79150	MGC4859	-0.244	0.164	0.343833	0.1751	-1.39	207.81
2861	G protein-coupled receptor 37	GPR37	-0.244	0.38	0.577404	0.2781	-0.877	3555.54
28986	MAGE family member H1	MAGEH1	-0.243	0.00758	0.0732068	0.091	-2.67	1535.37
64839	F-box and leucine rich repeat protein 17	FBXL17	-0.243	0.00911	0.0791588	0.0933	-2.61	2726.65
8505	poly(ADP-ribose) glycohydrolase	PARG	-0.243	0.011	0.0859702	0.0955	-2.54	809.05
257177	cilia and flagella associated protein 126	CFAP126	-0.243	0.0142	0.0967933	0.0989	-2.45	330.54
51582	antizyme inhibitor 1	AZIN1	-0.243	0.0169	0.105782	0.1016	-2.39	4795.75
55296	TBC1 domain family member 19	TBC1D19	-0.243	0.0178	0.108449	0.1027	-2.37	545.81
10299	membrane associated ring-CH-type finger 6	MARCHF6	-0.243	0.0185	0.110199	0.103	-2.36	9851.24
157769	family with sequence similarity 91 member A1	FAM91A1	-0.243	0.0203	0.115367	0.1046	-2.32	1190.77
51719	calcium binding protein 39	CAB39	-0.243	0.0243	0.125372	0.1079	-2.25	4937.72
55617	taspase 1	TASP1	-0.243	0.0261	0.129522	0.1093	-2.22	372.66
2617	glycyl-tRNA synthetase 1	GARS1	-0.243	0.0291	0.136405	0.1116	-2.18	3562.47
27020	neuroplastin	NPTN	-0.243	0.0397	0.158911	0.1182	-2.06	10634.3
5789	protein tyrosine phosphatase receptor type D	PTPRD	-0.243	0.0537	0.184304	0.126	-1.93	7069.08
56896	dihydropyrimidinase like 5	DPYSL5	-0.243	0.0849	0.23478	0.1409	-1.72	6306.99
105371686		LOC105371686	-0.243	0.248	0.444616	0.2104	-1.15	57.53
105376360	uncharacterized LOC105376360	LOC105376360	-0.243	0.168	0.349094	0.1765	-1.38	266.48
105378161		LOC105378161	-0.243	0.0943	0.2486	0.145	-1.67	39.72
107985362	uncharacterized LOC107985362	LOC107985362	-0.243	0.168	0.349094	0.176	-1.38	15.96
107986307	uncharacterized LOC107986307	LOC107986307	-0.243	0.153	0.329208	0.1702	-1.43	18.53
107986578	uncharacterized LOC107986578	LOC107986578	-0.243	0.0218	0.119648	0.1059	-2.29	34.07
107986606	uncharacterized LOC107986606	LOC107986606	-0.243	0.126	0.294194	0.1591	-1.53	17.31
23676	small muscle protein X-linked	SMPX	-0.243	0.206	0.396595	0.1918	-1.26	16.76
84624	fibronectin type III domain containing 1	FNDC1	-0.243	0.225	0.419808	0.2001	-1.21	26.58
79183	alpha tocopherol transfer protein like	TTPAL	-0.242	0.00116	0.0310883	0.0745	-3.25	1054.79
65084	transmembrane protein 135	TMEM135	-0.242	0.00393	0.0548103	0.0838	-2.88	653.28
85865	GTP binding protein 10	GTPBP10	-0.242	0.00659	0.068818	0.0889	-2.72	801.4
55159	ring finger and WD repeat domain 3	RFWD3	-0.242	0.0111	0.0862025	0.0954	-2.54	326.13
26074	cilia and flagella associated protein 61	CFAP61	-0.242	0.016	0.102658	0.1005	-2.41	103.06
253943	YTH N6-methyladenosine RNA binding protein 3	YTHDF3	-0.242	0.0176	0.10795	0.1018	-2.37	1699.72
55435	adaptor related protein complex 1 associated regulatory protein	AP1AR	-0.242	0.0178	0.10835	0.1023	-2.37	1008.83
84890	2-aminoethanethiol dioxygenase	ADO	-0.242	0.0185	0.110185	0.1026	-2.36	1358.6
11073	DNA topoisomerase II binding protein 1	TOPBP1	-0.242	0.0225	0.121373	0.1063	-2.28	1142.22
140767	neurensin 1	NRSN1	-0.242	0.0291	0.13643	0.111	-2.18	4666.92
642273	family with sequence similarity 110 member C	FAM110C	-0.242	0.0335	0.146673	0.1141	-2.13	355.94
105378683	TMEM269 divergent transcript	TMEM269-DT	-0.242	0.038	0.155634	0.1167	-2.07	27.58
3098	hexokinase 1	HK1	-0.242	0.0391	0.157656	0.1172	-2.06	18643.9
4685	neural cell adhesion molecule 2	NCAM2	-0.242	0.0428	0.164758	0.1193	-2.03	7193.49
284716	ribosomal modification protein rimK like family member A	RIMKLA	-0.242	0.0765	0.222027	0.1368	-1.77	3461.81
8871	synaptojanin 2	SYNJ2	-0.242	0.0765	0.222027	0.1364	-1.77	5283.76
5287	phosphatidylinositol-4-phosphate 3-kinase catalytic subunit type 2 beta	PIK3C2B	-0.242	0.0957	0.250301	0.1453	-1.67	2134.34
105371856	uncharacterized LOC105371856	LOC105371856	-0.242	0.0856	0.235906	0.1407	-1.72	46.96
107986065	uncharacterized LOC107986065	LOC107986065	-0.242	0.177	0.360498	0.1795	-1.35	46.97
8001	glycine receptor alpha 3	GLRA3	-0.242	0.195	0.383873	0.1865	-1.3	1303.04
387357	thymocyte selection associated	THEMIS	-0.242	0.235	0.430264	0.2037	-1.19	228.17
342666	leucine rich repeat containing 37 member A11, pseudogene	LRRC37A11P	-0.242	0.268	0.4655	0.2185	-1.11	10.6
8452	cullin 3	CUL3	-0.241	0.0107	0.0851846	0.0946	-2.55	2879.88
51762	RAB8B, member RAS oncogene family	RAB8B	-0.241	0.0115	0.0875309	0.0954	-2.53	1274.14
103752584	CCND2 antisense RNA 1	CCND2-AS1	-0.241	0.0153	0.100268	0.0995	-2.43	152.71
8195	MKKS centrosomal shuttling protein	MKKS	-0.241	0.0159	0.102248	0.1	-2.41	1711.64
90411	multiple coagulation factor deficiency 2, ER cargo receptor complex subunit	MCFD2	-0.241	0.0226	0.121665	0.1059	-2.28	4773.56
140775	SMCR8-C9orf72 complex subunit	SMCR8	-0.241	0.0252	0.127653	0.1078	-2.24	1582.31
9917	FAM20B glycosaminoglycan xylosylkinase	FAM20B	-0.241	0.0287	0.135317	0.1099	-2.19	4233.28
22795	nidogen 2	NID2	-0.241	0.0311	0.141136	0.112	-2.16	196.13
10446	leucine rich repeat neuronal 2	LRRN2	-0.241	0.0467	0.172264	0.1212	-1.99	4331.53
27124	inositol polyphosphate-5-phosphatase J	INPP5J	-0.241	0.0617	0.19767	0.1289	-1.87	1641.6
254887	zinc finger DHHC-type palmitoyltransferase 23	ZDHHC23	-0.241	0.0772	0.222756	0.1362	-1.77	1543.18
105369872	uncharacterized LOC105369872	LOC105369872	-0.241	0.0502	0.17917	0.1232	-1.96	149.14
105372586	uncharacterized LOC105372586	LOC105372586	-0.241	0.215	0.407726	0.1946	-1.24	21.71
105377887		LOC105377887	-0.241	0.00675	0.0693948	0.089	-2.71	126.78
117157	SH2 domain containing 1B	SH2D1B	-0.241	0.228	0.422631	0.2002	-1.21	77.32
3113	major histocompatibility complex, class II, DP alpha 1	HLA-DPA1	-0.241	0.353	0.551644	0.2592	-0.929	363.62
220729	SDHA pseudogene 4	SDHAP4	-0.24	0.00563	0.0645915	0.0866	-2.77	700
100506901	uncharacterized LL0XNC01-250H12.3	LL0XNC01-250H12.3	-0.24	0.00581	0.0654897	0.087	-2.76	127.78
10193	ring finger protein 41	RNF41	-0.24	0.00729	0.0721281	0.0893	-2.68	3790.92
10999	solute carrier family 27 member 4	SLC27A4	-0.24	0.022	0.120186	0.1048	-2.29	4652
55107	anoctamin 1	ANO1	-0.24	0.0301	0.138748	0.1105	-2.17	184.91
23504	RIMS binding protein 2	RIMBP2	-0.24	0.0471	0.172914	0.1208	-1.99	5165.56
2891	glutamate ionotropic receptor AMPA type subunit 2	GRIA2	-0.24	0.052	0.181725	0.1236	-1.94	9015.38
221895	JAZF zinc finger 1	JAZF1	-0.24	0.0742	0.218351	0.1343	-1.79	2064.44
150726	F-box protein 41	FBXO41	-0.24	0.0904	0.242581	0.1418	-1.69	24926.4
7058	thrombospondin 2	THBS2	-0.24	0.231	0.425708	0.2001	-1.2	1624.63
283165	KIRREL3 antisense RNA 3	KIRREL3-AS3	-0.24	0.263	0.460528	0.2146	-1.12	20.16
8367	H4 clustered histone 5	H4C5	-0.24	0.278	0.475625	0.2211	-1.08	9.62
1287	collagen type IV alpha 5 chain	COL4A5	-0.24	0.347	0.546371	0.2551	-0.94	1121.75
55539	KCNQ1 downstream neighbor	KCNQ1DN	-0.24	0.439	0.629916	0.3107	-0.774	15.44
1687	gasdermin E	GSDME	-0.239	0.000275	0.0167829	0.0658	-3.64	730
1000	cadherin 2	CDH2	-0.239	0.00551	0.0639711	0.086	-2.78	3244.9
65264	ubiquitin conjugating enzyme E2 Z	UBE2Z	-0.239	0.00755	0.0730423	0.0896	-2.67	4468.99
132200	chromosome 3 open reading frame 49	C3orf49	-0.239	0.0131	0.0932106	0.0961	-2.48	133.16
23287	ATP/GTP binding carboxypeptidase 1	AGTPBP1	-0.239	0.0146	0.0981222	0.0979	-2.44	2890.47
400	ADP ribosylation factor like GTPase 1	ARL1	-0.239	0.0177	0.108168	0.1007	-2.37	2761.62
148304	chromosome 1 open reading frame 74	C1orf74	-0.239	0.0181	0.109134	0.1009	-2.36	109.78
2475	mechanistic target of rapamycin kinase	MTOR	-0.239	0.0185	0.110199	0.1014	-2.36	4510.62
376267	RAB15, member RAS oncogene family	RAB15	-0.239	0.0235	0.12415	0.1056	-2.26	8475.54
56140	protocadherin alpha 8	PCDHA8	-0.239	0.0277	0.133054	0.1086	-2.2	260.71
84162	bridge-like lipid transfer protein family member 1	BLTP1	-0.239	0.0285	0.135135	0.1092	-2.19	8386.96
1121	CHM Rab escort protein	CHM	-0.239	0.0594	0.193787	0.1267	-1.89	1494.73
84868	hepatitis A virus cellular receptor 2	HAVCR2	-0.239	0.0597	0.194337	0.1266	-1.88	108.67
133418	embigin	EMB	-0.239	0.0624	0.198845	0.1281	-1.86	169.89
7071	KLF transcription factor 10	KLF10	-0.239	0.0901	0.242148	0.1409	-1.69	798.86
100190940	long intergenic non-protein coding RNA 2418	LINC02418	-0.239	0.14	0.312999	0.1622	-1.47	18.64
4121	mannosidase alpha class 1A member 1	MAN1A1	-0.239	0.152	0.328214	0.167	-1.43	1259.95
6301	seryl-tRNA synthetase 1	SARS1	-0.238	0.00634	0.0677843	0.0872	-2.73	6717.16
100130172	FAM13B antisense RNA 1	FAM13B-AS1	-0.238	0.0119	0.0891254	0.0947	-2.52	75.1
96459	folliculin interacting protein 1	FNIP1	-0.238	0.0127	0.0918571	0.0956	-2.49	1163.82
10513	amyloid beta precursor protein binding protein 2	APPBP2	-0.238	0.0181	0.109208	0.1005	-2.36	2431.96
79646	pantothenate kinase 3	PANK3	-0.238	0.0243	0.125372	0.1055	-2.25	3245.48
8731	RNA guanine-7 methyltransferase	RNMT	-0.238	0.0289	0.13579	0.1091	-2.19	3302.67
80124	valosin containing protein interacting protein 1	VCPIP1	-0.238	0.0292	0.136471	0.1093	-2.18	1749.31
7357	UDP-glucose ceramide glucosyltransferase	UGCG	-0.238	0.031	0.141071	0.1105	-2.16	1241.82
57691	KIAA1586	KIAA1586	-0.238	0.0316	0.14224	0.1106	-2.15	442.73
55799	calcium voltage-gated channel auxiliary subunit alpha2delta 3	CACNA2D3	-0.238	0.0448	0.168798	0.1185	-2.01	1524.02
55356	solute carrier family 22 member 15	SLC22A15	-0.238	0.093	0.246969	0.1418	-1.68	842.77
129684	contactin associated protein family member 5	CNTNAP5	-0.238	0.109	0.269888	0.1486	-1.6	2752.81
84832	ankyrin repeat domain 36B pseudogene 1	ANKRD36BP1	-0.238	0.134	0.30404	0.1589	-1.5	69.1
441151	transmembrane protein 151B	TMEM151B	-0.238	0.134	0.30426	0.1587	-1.5	20451.9
285084	long intergenic non-protein coding RNA 1305	LINC01305	-0.238	0.0665	0.206055	0.1298	-1.83	29.11
102724557	uncharacterized LOC102724557	LOC102724557	-0.238	0.119	0.28393	0.1526	-1.56	19.86
1859	dual specificity tyrosine phosphorylation regulated kinase 1A	DYRK1A	-0.237	0.00592	0.0660678	0.0861	-2.75	3431.76
57470	leucine rich repeat containing 47	LRRC47	-0.237	0.0104	0.0843706	0.0925	-2.56	2785.4
322	amyloid beta precursor protein binding family B member 1	APBB1	-0.237	0.0112	0.0862483	0.0935	-2.54	23425.2
54475	notchless homolog 1	NLE1	-0.237	0.0134	0.0946689	0.096	-2.47	1304.82
5223	phosphoglycerate mutase 1	PGAM1	-0.237	0.0135	0.0951497	0.0961	-2.47	8844.87
10152	abl interactor 2	ABI2	-0.237	0.0136	0.095301	0.0959	-2.47	14305.6
55334	solute carrier family 39 member 9	SLC39A9	-0.237	0.0146	0.0982868	0.0971	-2.44	1868.93
3308	heat shock protein family A (Hsp70) member 4	HSPA4	-0.237	0.0174	0.107232	0.0997	-2.38	5242.91
2965	general transcription factor IIH subunit 1	GTF2H1	-0.237	0.0178	0.108439	0.0999	-2.37	1009.44
80852	glutamate receptor interacting protein 2	GRIP2	-0.237	0.0204	0.115572	0.1021	-2.32	1998.11
167227	decapping mRNA 2	DCP2	-0.237	0.0425	0.163988	0.1168	-2.03	1671.14
10690	fucosyltransferase 9	FUT9	-0.237	0.0456	0.170313	0.1186	-2	3820.1
51062	atlastin GTPase 1	ATL1	-0.237	0.0514	0.180837	0.1217	-1.95	5076.99
55885	LIM domain only 3	LMO3	-0.237	0.0641	0.201926	0.1278	-1.85	8658.46
84830	androgen dependent TFPI regulating protein	ADTRP	-0.237	0.0652	0.203684	0.1284	-1.84	220.73
221191	serine protease 54	PRSS54	-0.237	0.0814	0.229281	0.1359	-1.74	175.61
90488	transmembrane protein 263	TMEM263	-0.236	0.00411	0.0558849	0.0822	-2.87	684.11
100133669	LY6E divergent transcript	LY6E-DT	-0.236	0.0111	0.0860359	0.0928	-2.54	242.21
51400	protein phosphatase methylesterase 1	PPME1	-0.236	0.0175	0.107617	0.0992	-2.38	5492.66
6091	roundabout guidance receptor 1	ROBO1	-0.236	0.0227	0.122004	0.1037	-2.28	1915.64
28779	immunoglobulin lambda variable 5-52	IGLV5-52	-0.236	0.0243	0.125372	0.1047	-2.25	117.81
64781	ceramide kinase	CERK	-0.236	0.0251	0.127459	0.1053	-2.24	2859.45
10776	cAMP regulated phosphoprotein 19	ARPP19	-0.236	0.0326	0.144521	0.1104	-2.14	15619.2
1821	dystrophin related protein 2	DRP2	-0.236	0.0504	0.179365	0.1208	-1.96	2372.05
5602	mitogen-activated protein kinase 10	MAPK10	-0.236	0.0546	0.185636	0.1226	-1.92	12623.8
6376	C-X3-C motif chemokine ligand 1	CX3CL1	-0.236	0.0582	0.191945	0.1245	-1.89	12272.5
9365	klotho	KL	-0.236	0.0723	0.215381	0.1312	-1.8	111.38
56143	protocadherin alpha 5	PCDHA5	-0.236	0.0847	0.234486	0.137	-1.72	380.88
6445	sarcoglycan gamma	SGCG	-0.236	0.103	0.260812	0.1447	-1.63	54.03
23333	dpy-19 like C-mannosyltransferase 1	DPY19L1	-0.236	0.109	0.269429	0.147	-1.6	2701.46
105374711	uncharacterized LOC105374711	LOC105374711	-0.236	0.0362	0.152292	0.1126	-2.09	47.42
105375429	uncharacterized LOC105375429	LOC105375429	-0.236	0.034	0.147391	0.1115	-2.12	33.84
105376872	uncharacterized LOC105376872	LOC105376872	-0.236	0.083	0.232058	0.1364	-1.73	27.49
107983982	uncharacterized LOC107983982	LOC107983982	-0.236	0.157	0.335003	0.1672	-1.41	12.78
165679	serine palmitoyltransferase small subunit B	SPTSSB	-0.236	0.149	0.32456	0.1635	-1.44	481.78
205564	SUMO specific peptidase 5	SENP5	-0.235	0.00421	0.0565371	0.082	-2.86	1699.36
10949	heterogeneous nuclear ribonucleoprotein A0	HNRNPA0	-0.235	0.0061	0.0668903	0.0856	-2.74	3118.11
51669	store-operated calcium entry associated regulatory factor	SARAF	-0.235	0.0146	0.0983076	0.0963	-2.44	15909
535	ATPase H+ transporting V0 subunit a1	ATP6V0A1	-0.235	0.0198	0.114076	0.1007	-2.33	29460.5
4842	nitric oxide synthase 1	NOS1	-0.235	0.0213	0.118231	0.1021	-2.3	2046.84
8925	HECT and RLD domain containing E3 ubiquitin protein ligase family member 1	HERC1	-0.235	0.0314	0.141782	0.109	-2.15	11255.1
66036	myotubularin related protein 9	MTMR9	-0.235	0.0321	0.143309	0.1098	-2.14	3466.97
23428	solute carrier family 7 member 8	SLC7A8	-0.235	0.0338	0.147092	0.1108	-2.12	2922.37
8239	ubiquitin specific peptidase 9 X-linked	USP9X	-0.235	0.0355	0.150702	0.1117	-2.1	7602.86
1653	DEAD-box helicase 1	DDX1	-0.235	0.0378	0.155364	0.1131	-2.08	3532.77
547	kinesin family member 1A	KIF1A	-0.235	0.0488	0.176582	0.1191	-1.97	170289
143879	kelch repeat and BTB domain containing 3	KBTBD3	-0.235	0.0508	0.179964	0.1203	-1.95	716.66
9665	meiosis regulator and mRNA stability factor 1	MARF1	-0.235	0.0768	0.222353	0.1331	-1.77	7671.14
51560	RAB6B, member RAS oncogene family	RAB6B	-0.235	0.0865	0.237023	0.1369	-1.71	21146.6
50859	SPARC (osteonectin), cwcv and kazal like domains proteoglycan 3	SPOCK3	-0.235	0.114	0.277146	0.1486	-1.58	3571.55
51725	F-box protein 40	FBXO40	-0.235	0.119	0.283679	0.1505	-1.56	133.68
105373153	uncharacterized LOC105373153	LOC105373153	-0.235	0.127	0.294488	0.1537	-1.53	16.41
285220	EPH receptor A6	EPHA6	-0.235	0.163	0.342725	0.1686	-1.39	1457.83
407004	microRNA 22	MIR22	-0.235	0.175	0.357815	0.1731	-1.36	14.59
60561	RAD50 interactor 1	RINT1	-0.234	0.00162	0.0359812	0.0743	-3.15	348.81
9631	nucleoporin 155	NUP155	-0.234	0.00543	0.0637337	0.0843	-2.78	771.67
8417	syntaxin 7	STX7	-0.234	0.00761	0.0732782	0.0875	-2.67	3576.11
64919	BCL11 transcription factor B	BCL11B	-0.234	0.015	0.099353	0.0961	-2.43	1413.7
64645	major facilitator superfamily domain containing 14A	MFSD14A	-0.234	0.016	0.10248	0.0972	-2.41	1193.87
5431	RNA polymerase II subunit B	POLR2B	-0.234	0.0219	0.12006	0.102	-2.29	2813.64
55022	phosphotyrosine interaction domain containing 1	PID1	-0.234	0.0265	0.130522	0.1056	-2.22	1896.85
23321	tripartite motif containing 2	TRIM2	-0.234	0.0311	0.141136	0.1086	-2.16	16137.9
64682	anaphase promoting complex subunit 1	ANAPC1	-0.234	0.0312	0.141299	0.1084	-2.15	1171.69
9500	MAGE family member D1	MAGED1	-0.234	0.0349	0.149582	0.111	-2.11	9911.49
288	ankyrin 3	ANK3	-0.234	0.0355	0.150899	0.1115	-2.1	12951.4
100505869	CFAP58 divergent transcript	CFAP58-DT	-0.234	0.0386	0.156615	0.113	-2.07	88.18
221935	sidekick cell adhesion molecule 1	SDK1	-0.234	0.0393	0.158024	0.1137	-2.06	601.66
22820	COPI coat complex subunit gamma 1	COPG1	-0.234	0.0454	0.169974	0.1168	-2	6097.06
101928069	DPP3 divergent transcript	DPP3-DT	-0.234	0.0537	0.184322	0.1215	-1.93	313.93
7905	receptor accessory protein 5	REEP5	-0.234	0.0641	0.201943	0.1266	-1.85	13088.9
8744	TNF superfamily member 9	TNFSF9	-0.234	0.0689	0.209916	0.1285	-1.82	113.68
8913	calcium voltage-gated channel subunit alpha1 G	CACNA1G	-0.234	0.0952	0.249884	0.1403	-1.67	3047.6
388849	coiled-coil domain containing 188	CCDC188	-0.234	0.13	0.299694	0.1548	-1.51	362.39
107986455	uncharacterized LOC107986455	LOC107986455	-0.234	0.0415	0.162354	0.1146	-2.04	142.32
403340	C-terminal binding protein 2 pseudogene	MGC70870	-0.234	0.406	0.600432	0.282	-0.832	66.72
9657	IQ motif containing B1	IQCB1	-0.233	0.000339	0.0180994	0.065	-3.58	471.67
153339	transmembrane protein 167A	TMEM167A	-0.233	0.00554	0.064141	0.0839	-2.77	3064.25
117289	T cell activation RhoGTPase activating protein	TAGAP	-0.233	0.0139	0.0959529	0.0947	-2.46	91.35
3840	karyopherin subunit alpha 4	KPNA4	-0.233	0.0164	0.103806	0.0969	-2.4	3760.07
441086	FAM169A antisense RNA 1	FAM169A-AS1	-0.233	0.0179	0.108569	0.0982	-2.37	68.35
11279	KLF transcription factor 8	KLF8	-0.233	0.0189	0.111448	0.0991	-2.35	534.03
133308	solute carrier family 9 member B2	SLC9B2	-0.233	0.0276	0.132914	0.1059	-2.2	1727.17
54472	toll interacting protein	TOLLIP	-0.233	0.0322	0.143544	0.1086	-2.14	18124.6
163	adaptor related protein complex 2 subunit beta 1	AP2B1	-0.233	0.0376	0.155031	0.1122	-2.08	19719.6
101928737	ZCCHC14 divergent transcript	ZCCHC14-DT	-0.233	0.0545	0.185494	0.1211	-1.92	24.59
122618	phospholipase D family member 4	PLD4	-0.233	0.0691	0.21009	0.1281	-1.82	402.35
54557	small glutamine rich tetratricopeptide repeat co-chaperone beta	SGTB	-0.233	0.0782	0.224301	0.1322	-1.76	4087.45
2135	exostosin like glycosyltransferase 2	EXTL2	-0.233	0.0865	0.237023	0.1356	-1.71	1126.86
2903	glutamate ionotropic receptor NMDA type subunit 2A	GRIN2A	-0.233	0.0967	0.251583	0.1401	-1.66	14268.5
283547	long intergenic non-protein coding RNA 639	LINC00639	-0.233	0.318	0.51689	0.2333	-0.999	341.7
105379082	uncharacterized LOC105379082	LOC105379082	-0.233	0.0961	0.251006	0.1397	-1.66	135.57
112268269	uncharacterized LOC112268269	LOC112268269	-0.233	0.0822	0.230717	0.1343	-1.74	117.21
653513	phosphodiesterase 4D interacting protein-like	LOC653513	-0.233	0.0133	0.0943542	0.0943	-2.48	1147.71
123624	AGBL carboxypeptidase 1	AGBL1	-0.233	0.15	0.325013	0.1618	-1.44	274.74
56479	potassium voltage-gated channel subfamily Q member 5	KCNQ5	-0.233	0.157	0.334161	0.1647	-1.42	3952.24
11247	neurexophilin 4	NXPH4	-0.233	0.223	0.416922	0.191	-1.22	638.4
5173	prodynorphin	PDYN	-0.233	0.27	0.467167	0.2112	-1.1	558.96
494514	TYMS opposite strand RNA	TYMSOS	-0.233	0.296	0.494576	0.2234	-1.04	43.05
261726	TOR signaling pathway regulator	TIPRL	-0.232	0.00207	0.0401318	0.0752	-3.08	1078.72
54943	DnaJ heat shock protein family (Hsp40) member C28	DNAJC28	-0.232	0.0025	0.0438716	0.0768	-3.02	133.65
83737	itchy E3 ubiquitin protein ligase	ITCH	-0.232	0.0124	0.0910383	0.0927	-2.5	2050.5
10825	neuraminidase 3	NEU3	-0.232	0.0154	0.100718	0.0957	-2.42	931.13
4139	microtubule affinity regulating kinase 1	MARK1	-0.232	0.0169	0.105698	0.0972	-2.39	2034
5870	RAB6A, member RAS oncogene family	RAB6A	-0.232	0.0279	0.1334	0.1053	-2.2	11638.5
9870	apoptosis resistant E3 ubiquitin protein ligase 1	AREL1	-0.232	0.0338	0.147092	0.1091	-2.12	2700.71
8774	NSF attachment protein gamma	NAPG	-0.232	0.0364	0.152524	0.1109	-2.09	3604.88
611	opsin 1, short wave sensitive	OPN1SW	-0.232	0.0364	0.152592	0.1109	-2.09	36.28
84871	AGBL carboxypeptidase 4	AGBL4	-0.232	0.0379	0.155492	0.1118	-2.08	647.1
3434	interferon induced protein with tetratricopeptide repeats 1	IFIT1	-0.232	0.0423	0.163727	0.1143	-2.03	1056.12
221424	leucine rich repeat containing 73	LRRC73	-0.232	0.0449	0.168996	0.1159	-2.01	721.04
460	astrotactin 1	ASTN1	-0.232	0.0487	0.176582	0.1176	-1.97	10103.3
23616	SH3 domain binding protein 1	SH3BP1	-0.232	0.0637	0.201129	0.1252	-1.85	505.52
57030	solute carrier family 17 member 7	SLC17A7	-0.232	0.0735	0.217204	0.1294	-1.79	57435.7
6622	synuclein alpha	SNCA	-0.232	0.0811	0.228983	0.1328	-1.74	10624
651	bone morphogenetic protein 3	BMP3	-0.232	0.0864	0.237004	0.1351	-1.71	60.24
114800	coiled-coil domain containing 85A	CCDC85A	-0.232	0.0956	0.250296	0.1392	-1.67	2332.22
392617	extracellular leucine rich repeat and fibronectin type III domain containing 1	ELFN1	-0.232	0.1	0.256495	0.1411	-1.64	902.06
105370169	uncharacterized LOC105370169	LOC105370169	-0.232	0.388	0.584103	0.2681	-0.864	66.46
730101	uncharacterized LOC730101	LOC730101	-0.232	0.0531	0.183352	0.1198	-1.93	166.96
6558	solute carrier family 12 member 2	SLC12A2	-0.232	0.159	0.337449	0.1648	-1.41	2774.35
29118	DEAD-box helicase 25	DDX25	-0.231	0.00372	0.0537727	0.0795	-2.9	1078.18
56126	protocadherin beta 10	PCDHB10	-0.231	0.00423	0.056694	0.0809	-2.86	420.19
11010	GLI pathogenesis related 1	GLIPR1	-0.231	0.0095	0.0808189	0.0889	-2.59	490.9
7874	ubiquitin specific peptidase 7	USP7	-0.231	0.0128	0.0920429	0.0929	-2.49	5288.44
55860	actin related protein 10	ACTR10	-0.231	0.0183	0.109685	0.0977	-2.36	1994.5
23233	exocyst complex component 6B	EXOC6B	-0.231	0.0187	0.110942	0.0981	-2.35	3849.77
387597	immunoglobulin like domain containing receptor 2	ILDR2	-0.231	0.0204	0.115572	0.0995	-2.32	1569.09
114788	CUB and Sushi multiple domains 3	CSMD3	-0.231	0.0222	0.120468	0.1009	-2.29	913.72
55103	Ral GEF with PH domain and SH3 binding motif 2	RALGPS2	-0.231	0.0256	0.128574	0.1037	-2.23	465.86
2115	ETS variant transcription factor 1	ETV1	-0.231	0.0275	0.132749	0.1048	-2.2	1812.1
56119	protocadherin alpha constant	PCDHACT	-0.231	0.0283	0.134557	0.1053	-2.19	195.5
1740	discs large MAGUK scaffold protein 2	DLG2	-0.231	0.033	0.145443	0.1084	-2.13	10772.6
9213	xenotropic and polytropic retrovirus receptor 1	XPR1	-0.231	0.0363	0.152292	0.1101	-2.09	1863.49
6785	ELOVL fatty acid elongase 4	ELOVL4	-0.231	0.0412	0.161982	0.1134	-2.04	1298.06
79180	EF-hand domain family member D2	EFHD2	-0.231	0.052	0.181725	0.1188	-1.94	10376.4
1952	cadherin EGF LAG seven-pass G-type receptor 2	CELSR2	-0.231	0.0735	0.217204	0.1292	-1.79	28771.7
11096	ADAM metallopeptidase with thrombospondin type 1 motif 5	ADAMTS5	-0.231	0.0806	0.228378	0.1319	-1.75	103.55
83857	transmembrane O-mannosyltransferase targeting cadherins 1	TMTC1	-0.231	0.084	0.233595	0.134	-1.73	2837.52
693185	microRNA 600	MIR600	-0.231	0.102	0.259416	0.1413	-1.63	47.35
56950	SET and MYND domain containing 2	SMYD2	-0.231	0.106	0.264686	0.1429	-1.62	1761.59
28639	T cell receptor beta constant 1	TRBC1	-0.231	0.109	0.269112	0.1442	-1.6	26.91
285375	long intergenic non-protein coding RNA 620	LINC00620	-0.231	0.295	0.493314	0.2207	-1.05	8.92
100129540	uncharacterized LOC100129540	LOC100129540	-0.231	0.069	0.209948	0.1269	-1.82	561.87
105371967	uncharacterized LOC105371967	LOC105371967	-0.231	0.0341	0.147657	0.1091	-2.12	235.06
105375614	uncharacterized LOC105375614	LOC105375614	-0.231	0.233	0.428565	0.1937	-1.19	18.39
146167	solute carrier family 38 member 8	SLC38A8	-0.231	0.315	0.513556	0.2292	-1.01	38.96
9689	basic leucine zipper and W2 domains 1	BZW1	-0.23	0.00333	0.0507953	0.0783	-2.94	2042.98
83877	TM2 domain containing 2	TM2D2	-0.23	0.00406	0.0556374	0.0802	-2.87	949.37
23262	diphosphoinositol pentakisphosphate kinase 2	PPIP5K2	-0.23	0.00511	0.0620652	0.0822	-2.8	1152.35
162968	zinc finger protein 497	ZNF497	-0.23	0.0241	0.12482	0.1018	-2.25	658.19
29070	coiled-coil domain containing 113	CCDC113	-0.23	0.027	0.131449	0.1042	-2.21	1299.74
10594	pre-mRNA processing factor 8	PRPF8	-0.23	0.0282	0.134495	0.1048	-2.19	13611.9
112755	syntaxin 1B	STX1B	-0.23	0.0374	0.154711	0.1106	-2.08	29230.8
2259	fibroblast growth factor 14	FGF14	-0.23	0.041	0.161687	0.1127	-2.04	1714.24
5097	protocadherin 1	PCDH1	-0.23	0.0432	0.165489	0.1139	-2.02	14371.5
84926	SPRY domain containing 3	SPRYD3	-0.23	0.0463	0.171492	0.1153	-1.99	17835.4
1993	ELAV like RNA binding protein 2	ELAVL2	-0.23	0.0688	0.20988	0.1263	-1.82	2667.91
83698	calneuron 1	CALN1	-0.23	0.0724	0.215381	0.1282	-1.8	6243.21
9935	MAF bZIP transcription factor B	MAFB	-0.23	0.0751	0.219606	0.1292	-1.78	605.15
11250	G protein-coupled receptor 45	GPR45	-0.23	0.078	0.224004	0.1305	-1.76	104.05
84852	ATP1A1 antisense RNA 1	ATP1A1-AS1	-0.23	0.128	0.29616	0.1509	-1.52	6287.68
105373538	long intergenic non-protein coding RNA 1885	LINC01885	-0.23	0.227	0.421076	0.1901	-1.21	62.06
105375836	uncharacterized LOC105375836	LOC105375836	-0.23	0.241	0.437906	0.1963	-1.17	9.28
693213	microRNA 628	MIR628	-0.23	0.248	0.444185	0.1988	-1.16	20
253558	lysocardiolipin acyltransferase 1	LCLAT1	-0.229	0.00695	0.0703297	0.0849	-2.7	390.13
11052	cleavage and polyadenylation specific factor 6	CPSF6	-0.229	0.007	0.0704794	0.0849	-2.7	2182.89
53346	transmembrane 6 superfamily member 1	TM6SF1	-0.229	0.00747	0.0727857	0.0854	-2.68	920.22
55054	autophagy related 16 like 1	ATG16L1	-0.229	0.00837	0.0763906	0.0869	-2.64	1027.95
80218	N-alpha-acetyltransferase 50, NatE catalytic subunit	NAA50	-0.229	0.00884	0.0784422	0.0875	-2.62	1871.82
2188	FA complementation group F	FANCF	-0.229	0.0116	0.0880558	0.0907	-2.52	264.37
3836	karyopherin subunit alpha 1	KPNA1	-0.229	0.0136	0.095301	0.0929	-2.47	2856.5
10499	nuclear receptor coactivator 2	NCOA2	-0.229	0.0197	0.113881	0.0981	-2.33	2551.98
64131	xylosyltransferase 1	XYLT1	-0.229	0.0266	0.130627	0.1035	-2.22	2926.81
126731	centriole, cilia and spindle associated protein	CCSAP	-0.229	0.0303	0.139199	0.1057	-2.17	3639.3
84867	protein tyrosine phosphatase non-receptor type 5	PTPN5	-0.229	0.0431	0.165356	0.113	-2.02	8819.53
5208	6-phosphofructo-2-kinase/fructose-2,6-biphosphatase 2	PFKFB2	-0.229	0.0464	0.171492	0.1147	-1.99	1463.79
2806	glutamic-oxaloacetic transaminase 2	GOT2	-0.229	0.0509	0.180141	0.1172	-1.95	5068.78
54566	erythrocyte membrane protein band 4.1 like 4B	EPB41L4B	-0.229	0.058	0.191532	0.1209	-1.9	2746.4
196	aryl hydrocarbon receptor	AHR	-0.229	0.0667	0.206173	0.1247	-1.83	467.82
23026	myosin XVI	MYO16	-0.229	0.0689	0.209916	0.1258	-1.82	895.26
26056	RAB11 family interacting protein 5	RAB11FIP5	-0.229	0.0758	0.220918	0.1289	-1.78	7392.02
84332	DPY30 domain containing 2	DYDC2	-0.229	0.0838	0.233365	0.1323	-1.73	33.79
101928957	uncharacterized LOC101928957	LOC101928957	-0.229	0.117	0.281537	0.1464	-1.57	48.03
1803	dipeptidyl peptidase 4	DPP4	-0.229	0.162	0.340618	0.1633	-1.4	76.17
92	activin A receptor type 2A	ACVR2A	-0.228	0.0126	0.091585	0.0912	-2.5	738.21
8445	dual specificity tyrosine phosphorylation regulated kinase 2	DYRK2	-0.228	0.0183	0.109685	0.0965	-2.36	743.45
23506	BICRA like chromatin remodeling complex associated protein	BICRAL	-0.228	0.0194	0.112882	0.0975	-2.34	1524.81
8672	eukaryotic translation initiation factor 4 gamma 3	EIF4G3	-0.228	0.0198	0.114037	0.0979	-2.33	7316.81
126272	EP300 interacting inhibitor of differentiation 2B	EID2B	-0.228	0.0254	0.128055	0.1018	-2.24	398.24
9703	bridge-like lipid transfer protein family member 2	BLTP2	-0.228	0.0264	0.130317	0.1028	-2.22	8274.86
283489	chromosome alignment maintaining phosphoprotein 1	CHAMP1	-0.228	0.0284	0.134745	0.1041	-2.19	750.08
3899	ALF transcription elongation factor 3	AFF3	-0.228	0.0347	0.149008	0.1078	-2.11	3658.73
23390	zinc finger DHHC-type palmitoyltransferase 17	ZDHHC17	-0.228	0.0363	0.152429	0.1088	-2.09	2914.53
51527	GSK3B interacting protein	GSKIP	-0.228	0.0372	0.154475	0.1094	-2.08	894.78
5983	replication factor C subunit 3	RFC3	-0.228	0.0398	0.159199	0.1108	-2.06	246.85
8803	succinate-CoA ligase ADP-forming subunit beta	SUCLA2	-0.228	0.0607	0.195828	0.1213	-1.88	2845.96
57469	PNMA family member 8B	PNMA8B	-0.228	0.0647	0.202984	0.1236	-1.85	12631.7
101928377	JDP2 antisense RNA 1	JDP2-AS1	-0.228	0.0652	0.203776	0.1235	-1.84	247.38
100506965	Prader Willi/Angelman region RNA 6	PWAR6	-0.228	0.0679	0.20816	0.1248	-1.83	9029.18
105379193	uncharacterized LOC105379193	LOC105379193	-0.228	0.035	0.149836	0.1082	-2.11	152.46
79905	transmembrane channel like 7	TMC7	-0.228	0.257	0.453723	0.201	-1.13	512.81
8916	HECT and RLD domain containing E3 ubiquitin protein ligase 3	HERC3	-0.227	0.00699	0.0704667	0.0841	-2.7	2046.88
9375	transmembrane 9 superfamily member 2	TM9SF2	-0.227	0.00809	0.0749128	0.0856	-2.65	3029.78
96610	BMS1 pseudogene 20	BMS1P20	-0.227	0.00928	0.0799087	0.0871	-2.6	605.31
388566	zinc finger protein 470	ZNF470	-0.227	0.0111	0.0860826	0.0892	-2.54	705.69
145173	beta 3-glucosyltransferase	B3GLCT	-0.227	0.015	0.099353	0.0932	-2.43	588.97
53339	BTB domain containing 1	BTBD1	-0.227	0.0158	0.102097	0.0942	-2.41	3601.37
4249	alpha-1,6-mannosylglycoprotein 6-beta-N-acetylglucosaminyltransferase	MGAT5	-0.227	0.0167	0.104756	0.0947	-2.39	4420.29
6505	solute carrier family 1 member 1	SLC1A1	-0.227	0.0196	0.113363	0.0971	-2.33	1824.55
9652	SKI3 subunit of superkiller complex	SKIC3	-0.227	0.0215	0.118754	0.0987	-2.3	3019.64
157378	transmembrane protein 65	TMEM65	-0.227	0.0321	0.143363	0.1061	-2.14	1249
1595	cytochrome P450 family 51 subfamily A member 1	CYP51A1	-0.227	0.0343	0.148042	0.1073	-2.12	2193.53
[truncated: 20,934 more rows]

## Sheet: AnCg Bipolar Disorder vs Contro
GeneID	Description	Symbol	log2FoldChange	pvalue	padj	lfcSE	stat	baseMean	up:1821	down:99
1	alpha-1-B glycoprotein	A1BG	0.246	0.0139	0.0903857	0.1001	2.46007	231.45
503538	A1BG antisense RNA 1	A1BG-AS1	-0.102	0.154	0.318194	0.0716	-1.42553	315.61
2	alpha-2-macroglobulin	A2M	-0.0419	0.776	0.863138	0.1472	-0.284972	7943.76
144571	A2M antisense RNA 1	A2M-AS1	-0.00362	0.974	0.984652	0.1105	-0.0327506	164.29
144568	alpha-2-macroglobulin like 1	A2ML1	0.352	0.0389	0.148358	0.1704	2.06569	211.8
53947	alpha 1,4-galactosyltransferase (P blood group)	A4GALT	0.782	0.000296	0.0133469	0.2162	3.61855	214.12
8086	aladin WD repeat nucleoporin	AAAS	0.0254	0.742	0.840876	0.077	0.329498	814.72
65985	acetoacetyl-CoA synthetase	AACS	-0.138	0.192	0.363131	0.1055	-1.30517	3448.51
729522	acetoacetyl-CoA synthetase pseudogene 1	AACSP1	-0.157	0.328	0.509539	0.1603	-0.977144	13.38
51166	aminoadipate aminotransferase	AADAT	0.0845	0.206	0.379682	0.0669	1.26373	361.88
79719	alpha and gamma adaptin binding protein	AAGAB	-0.31	0.00185	0.0332486	0.0995	-3.11305	1331.64
22848	AP2 associated kinase 1	AAK1	-0.156	0.0983	0.244243	0.0941	-1.65324	12048.1
28971	adipogenesis associated Mth938 domain containing	AAMDC	0.241	0.0393	0.149076	0.117	2.06116	99.81
14	angio associated migratory cell protein	AAMP	-0.117	0.125	0.28101	0.0763	-1.53379	3224.89
15	aralkylamine N-acetyltransferase	AANAT	0.146	0.345	0.525804	0.155	0.943838	49.31
25980	AAR2 splicing factor	AAR2	-0.0515	0.356	0.536148	0.0557	-0.923409	645.36
441376	alanine and arginine rich domain containing protein	AARD	-0.124	0.382	0.560575	0.1416	-0.874572	53.75
16	alanyl-tRNA synthetase 1	AARS1	-0.311	0.00336	0.0448204	0.1061	-2.93278	12257.6
57505	alanyl-tRNA synthetase 2, mitochondrial	AARS2	-0.131	0.143	0.30444	0.0895	-1.46521	1703.28
80755	alanyl-tRNA synthetase domain containing 1	AARSD1	0.0187	0.745	0.842792	0.0574	0.325762	483.31
132949	aminoadipate-semialdehyde dehydrogenase	AASDH	0.0605	0.564	0.714626	0.1049	0.577036	512.68
60496	aminoadipate-semialdehyde dehydrogenase-phosphopantetheinyl transferase	AASDHPPT	-0.227	0.0246	0.118705	0.101	-2.24688	2958.02
10157	aminoadipate-semialdehyde synthase	AASS	0.313	0.0455	0.159972	0.1564	2.00041	636.22
284837	apoptosis associated transcript in bladder cancer	AATBC	-0.105	0.523	0.682882	0.1649	-0.639001	135.38
26574	apoptosis antagonizing transcription factor	AATF	0.1	0.19	0.361492	0.0766	1.30922	859.69
9625	apoptosis associated tyrosine kinase	AATK	-0.297	0.0637	0.191783	0.16	-1.85412	23312.8
103021294	apoptotic BCL2L1-antisense long non-coding RNA	ABALON	-0.145	0.107	0.256098	0.09	-1.6123	750.34
18	4-aminobutyrate aminotransferase	ABAT	-0.175	0.111	0.261607	0.1101	-1.59234	12716.5
19	ATP binding cassette subfamily A member 1	ABCA1	0.29	0.0703	0.202485	0.1601	1.80984	573.69
10349	ATP binding cassette subfamily A member 10	ABCA10	0.39	0.00421	0.0503191	0.1363	2.8621	110.04
79963	ATP binding cassette subfamily A member 11, pseudogene	ABCA11P	-0.119	0.156	0.320596	0.0838	-1.41827	273.55
26154	ATP binding cassette subfamily A member 12	ABCA12	0.443	0.0202	0.107316	0.1906	2.32341	24.7
650655	ATP binding cassette subfamily A member 17, pseudogene	ABCA17P	0.34	0.00447	0.0521663	0.1196	2.84264	119.81
20	ATP binding cassette subfamily A member 2	ABCA2	-0.305	0.0419	0.153946	0.1498	-2.03446	68226.8
21	ATP binding cassette subfamily A member 3	ABCA3	-0.171	0.15	0.313702	0.1186	-1.43875	13447.2
24	ATP binding cassette subfamily A member 4	ABCA4	0.187	0.141	0.302361	0.1269	1.47064	42.67
23461	ATP binding cassette subfamily A member 5	ABCA5	-0.0963	0.258	0.437377	0.0851	-1.13129	1294.74
23460	ATP binding cassette subfamily A member 6	ABCA6	0.589	0.0029	0.0420359	0.1977	2.97779	308.39
10347	ATP binding cassette subfamily A member 7	ABCA7	-0.0352	0.77	0.859574	0.1206	-0.291889	2053.78
10351	ATP binding cassette subfamily A member 8	ABCA8	-0.345	0.114	0.265759	0.2181	-1.57941	1036.89
10350	ATP binding cassette subfamily A member 9	ABCA9	0.226	0.0683	0.199321	0.124	1.82284	319.7
5243	ATP binding cassette subfamily B member 1	ABCB1	0.211	0.165	0.331659	0.1524	1.38717	1012.86
23456	ATP binding cassette subfamily B member 10	ABCB10	-0.106	0.05	0.167553	0.0541	-1.96002	432.55
8647	ATP binding cassette subfamily B member 11	ABCB11	0.523	0.0345	0.139861	0.2473	2.11458	14.21
5244	ATP binding cassette subfamily B member 4	ABCB4	0.126	0.132	0.290889	0.0834	1.50506	94.51
10058	ATP binding cassette subfamily B member 6 (Langereis blood group)	ABCB6	-0.0681	0.348	0.529267	0.0726	-0.937975	1810.52
22	ATP binding cassette subfamily B member 7	ABCB7	0.0105	0.885	0.930773	0.0724	0.145191	409.43
11194	ATP binding cassette subfamily B member 8	ABCB8	-0.118	0.139	0.299119	0.0797	-1.47986	2270.8
23457	ATP binding cassette subfamily B member 9	ABCB9	0.0363	0.571	0.720285	0.0641	0.566335	2265.41
4363	ATP binding cassette subfamily C member 1	ABCC1	-0.237	0.0212	0.109978	0.103	-2.3051	904.97
89845	ATP binding cassette subfamily C member 10	ABCC10	-0.0146	0.855	0.91272	0.0797	-0.1827	1493.37
85320	ATP binding cassette subfamily C member 11	ABCC11	0.212	0.0101	0.0774422	0.0823	2.57332	106.86
94160	ATP binding cassette subfamily C member 12	ABCC12	-0.256	0.0708	0.203196	0.1415	-1.80661	138.52
1244	ATP binding cassette subfamily C member 2	ABCC2	0.507	0.0124	0.0855392	0.2029	2.49983	18.83
8714	ATP binding cassette subfamily C member 3	ABCC3	0.203	0.311	0.49262	0.2008	1.01237	60.17
10257	ATP binding cassette subfamily C member 4	ABCC4	0.109	0.458	0.629099	0.1472	0.742816	133.01
10057	ATP binding cassette subfamily C member 5	ABCC5	-0.153	0.0648	0.193501	0.0828	-1.84643	3530.3
368	ATP binding cassette subfamily C member 6	ABCC6	0.757	4.98e-06	0.0028391	0.1657	4.56558	94.37
653190	ATP binding cassette subfamily C member 6 pseudogene 1	ABCC6P1	0.428	0.0175	0.100493	0.1802	2.37611	18.31
6833	ATP binding cassette subfamily C member 8	ABCC8	0.0654	0.539	0.696476	0.1066	0.613724	3241.21
10060	ATP binding cassette subfamily C member 9	ABCC9	0.309	0.0765	0.212702	0.1744	1.77148	706.76
215	ATP binding cassette subfamily D member 1	ABCD1	0.0875	0.488	0.654765	0.1263	0.693071	457.66
225	ATP binding cassette subfamily D member 2	ABCD2	-0.0724	0.566	0.71607	0.1262	-0.574016	660.47
5825	ATP binding cassette subfamily D member 3	ABCD3	0.0222	0.808	0.883533	0.0915	0.242756	1174.95
5826	ATP binding cassette subfamily D member 4	ABCD4	0.253	0.0157	0.0959092	0.1046	2.41505	899.47
6059	ATP binding cassette subfamily E member 1	ABCE1	-0.169	0.0428	0.155423	0.0835	-2.02558	1178.07
23	ATP binding cassette subfamily F member 1	ABCF1	-0.122	0.0393	0.14902	0.0591	-2.06152	3061.39
107986587	ABCF1 divergent transcript	ABCF1-DT	0.627	0.000395	0.0150273	0.1769	3.54354	16.9
10061	ATP binding cassette subfamily F member 2	ABCF2	-0.13	0.0494	0.166741	0.0663	-1.96552	1618.37
114483834	ABCF2-H2BK1 readthrough	ABCF2-H2BK1	-0.182	0.0424	0.15493	0.0895	-2.02948	912.03
55324	ATP binding cassette subfamily F member 3	ABCF3	-0.22	0.00953	0.0753361	0.0848	-2.59233	2079.49
9619	ATP binding cassette subfamily G member 1	ABCG1	-0.139	0.106	0.254143	0.086	-1.61832	2162.92
9429	ATP binding cassette subfamily G member 2 (Junior blood group)	ABCG2	-0.0855	0.643	0.773201	0.1848	-0.462867	1310.18
64137	ATP binding cassette subfamily G member 4	ABCG4	-0.211	0.0865	0.228055	0.1229	-1.71416	1872.01
64240	ATP binding cassette subfamily G member 5	ABCG5	0.306	0.00211	0.0352029	0.0997	3.07405	42.06
64241	ATP binding cassette subfamily G member 8	ABCG8	0.071	0.496	0.660479	0.1041	0.681522	123.83
84696	abhydrolase domain containing 1	ABHD1	0.196	0.0294	0.129334	0.0898	2.17771	153.88
55347	abhydrolase domain containing 10, depalmitoylase	ABHD10	-0.131	0.0769	0.213061	0.0738	-1.76918	1073.11
83451	abhydrolase domain containing 11	ABHD11	0.103	0.276	0.456581	0.0946	1.08896	404.93
26090	abhydrolase domain containing 12, lysophospholipase	ABHD12	-0.103	0.0824	0.222074	0.0595	-1.73681	5446.04
145447	abhydrolase domain containing 12B	ABHD12B	0.00343	0.974	0.984652	0.1046	0.0327696	214.58
84945	abhydrolase domain containing 13	ABHD13	-0.0414	0.631	0.763643	0.0861	-0.480966	544.63
25864	abhydrolase domain containing 14A	ABHD14A	0.0174	0.792	0.87378	0.0659	0.26334	1131.28
100526760	ABHD14A-ACY1 readthrough	ABHD14A-ACY1	-0.0305	0.63	0.763643	0.0635	-0.481172	556.14
84836	abhydrolase domain containing 14B	ABHD14B	0.22	0.00497	0.0547761	0.0784	2.80895	541.76
116236	abhydrolase domain containing 15	ABHD15	0.0505	0.654	0.780829	0.1125	0.448618	189.91
7920	abhydrolase domain containing 16A, phospholipase	ABHD16A	-0.189	0.0425	0.154966	0.0932	-2.02891	1990.9
140701	abhydrolase domain containing 16B	ABHD16B	0.0511	0.727	0.831341	0.1461	0.349751	380.86
81926	abhydrolase domain containing 17A, depalmitoylase	ABHD17A	0.0463	0.739	0.839632	0.139	0.332702	6996.61
51104	abhydrolase domain containing 17B, depalmitoylase	ABHD17B	-0.122	0.282	0.462991	0.1134	-1.07645	981.76
58489	abhydrolase domain containing 17C, depalmitoylase	ABHD17C	0.018	0.793	0.874266	0.0685	0.262255	795.77
80167	abhydrolase domain containing 18	ABHD18	0.202	0.025	0.119525	0.09	2.24181	530.01
11057	abhydrolase domain containing 2, acylglycerol lipase	ABHD2	-0.13	0.229	0.406838	0.1085	-1.20184	3749.02
171586	abhydrolase domain containing 3, phospholipase	ABHD3	0.181	0.16	0.32546	0.1286	1.40461	252.32
63874	abhydrolase domain containing 4, N-acyl phospholipase B	ABHD4	0.283	0.0092	0.0738829	0.1088	2.60461	1061.66
51099	abhydrolase domain containing 5, lysophosphatidic acid acyltransferase	ABHD5	0.256	0.0254	0.120393	0.1145	2.23539	724.04
57406	abhydrolase domain containing 6, acylglycerol lipase	ABHD6	-0.227	0.0242	0.117917	0.1008	-2.25317	1635.95
79575	abhydrolase domain containing 8	ABHD8	-0.0697	0.522	0.682508	0.1089	-0.639911	5432.54
10006	abl interactor 1	ABI1	-0.131	0.157	0.321226	0.0924	-1.41588	2475.71
10152	abl interactor 2	ABI2	-0.207	0.0382	0.147293	0.0998	-2.07218	14485.7
51225	ABI family member 3	ABI3	0.14	0.45	0.622759	0.1855	0.754909	109.8
25890	ABI family member 3 binding protein	ABI3BP	0.0773	0.553	0.706168	0.1305	0.592618	158.96
54942	actin binding transcription modulator	ABITRAM	-0.0699	0.31	0.491533	0.0688	-1.01502	596.51
25	ABL proto-oncogene 1, non-receptor tyrosine kinase	ABL1	0.0363	0.662	0.786968	0.0832	0.436604	3720.37
27	ABL proto-oncogene 2, non-receptor tyrosine kinase	ABL2	-0.0148	0.821	0.891306	0.0653	-0.226613	2953.78
3983	actin binding LIM protein 1	ABLIM1	-0.0488	0.576	0.724563	0.0873	-0.558663	8240.57
84448	actin binding LIM protein family member 2	ABLIM2	-0.348	0.00298	0.0426037	0.1172	-2.96965	5097.76
22885	actin binding LIM protein family member 3	ABLIM3	-0.1	0.243	0.421247	0.0859	-1.16803	2821.6
28	ABO, alpha 1-3-N-acetylgalactosaminyltransferase and alpha 1-3-galactosyltransferase	ABO	0.662	0.000245	0.012186	0.1804	3.66794	248.39
29	ABR activator of RhoGEF and GTPase	ABR	-0.124	0.248	0.426883	0.1073	-1.15536	39516.9
137735	actin binding Rho activating protein	ABRA	-0.272	0.0931	0.23682	0.1617	-1.67933	20.83
58527	ABRA C-terminal like	ABRACL	-0.116	0.239	0.417506	0.0982	-1.17743	152.86
105371479	ABR antisense RNA 1	ABR-AS1	-0.0801	0.43	0.604866	0.1015	-0.789222	50.48
84142	abraxas 1, BRCA1 A complex subunit	ABRAXAS1	-0.017	0.759	0.852082	0.0554	-0.307017	223.54
23172	abraxas 2, BRISC complex subunit	ABRAXAS2	-0.108	0.139	0.299583	0.0731	-1.47866	510.93
29777	activator of basal transcription 1	ABT1	-0.0289	0.546	0.701091	0.0479	-0.603418	314.01
80325	ankyrin repeat and BTB domain containing 1	ABTB1	-0.121	0.262	0.441191	0.1082	-1.12235	4381.05
25841	ankyrin repeat and BTB domain containing 2	ABTB2	-0.214	0.152	0.316084	0.1494	-1.43204	756.66
121551	ankyrin repeat and BTB domain containing 3	ABTB3	-0.484	0.00169	0.0319742	0.1543	-3.13938	977.87
30	acetyl-CoA acyltransferase 1	ACAA1	0.0282	0.623	0.758838	0.0575	0.490999	1407.89
10449	acetyl-CoA acyltransferase 2	ACAA2	0.351	0.00841	0.0708405	0.1331	2.63503	761.85
31	acetyl-CoA carboxylase alpha	ACACA	-0.214	0.0431	0.155938	0.106	-2.02283	6747.05
32	acetyl-CoA carboxylase beta	ACACB	0.128	0.352	0.532728	0.1378	0.930773	1445.99
80724	acyl-CoA dehydrogenase family member 10	ACAD10	0.111	0.038	0.146746	0.0535	2.07487	654.68
84129	acyl-CoA dehydrogenase family member 11	ACAD11	0.141	0.155	0.318707	0.0992	1.42367	262.16
27034	acyl-CoA dehydrogenase family member 8	ACAD8	-0.169	0.00766	0.0677187	0.0635	-2.66659	1327.33
28976	acyl-CoA dehydrogenase family member 9	ACAD9	-0.107	0.0968	0.242198	0.0644	-1.66046	1141.93
33	acyl-CoA dehydrogenase long chain	ACADL	0.0257	0.822	0.891939	0.1143	0.225212	60.51
34	acyl-CoA dehydrogenase medium chain	ACADM	0.0568	0.431	0.605701	0.0721	0.787441	968.95
35	acyl-CoA dehydrogenase short chain	ACADS	0.254	0.0372	0.145364	0.1219	2.0839	462.82
36	acyl-CoA dehydrogenase short/branched chain	ACADSB	-0.197	0.0757	0.211477	0.1107	-1.77618	1277.96
37	acyl-CoA dehydrogenase very long chain	ACADVL	0.142	0.0988	0.244848	0.0862	1.65063	6447.22
176	aggrecan	ACAN	-0.266	0.121	0.274689	0.1716	-1.55207	152.09
9744	ArfGAP with coiled-coil, ankyrin repeat and PH domains 1	ACAP1	0.257	0.00696	0.0642145	0.0951	2.69871	351.69
23527	ArfGAP with coiled-coil, ankyrin repeat and PH domains 2	ACAP2	0.0617	0.554	0.707061	0.1044	0.59123	1039.47
116983	ArfGAP with coiled-coil, ankyrin repeat and PH domains 3	ACAP3	-0.0772	0.549	0.702762	0.1287	-0.599904	21109.6
38	acetyl-CoA acetyltransferase 1	ACAT1	-0.0336	0.568	0.717382	0.0588	-0.571418	1004.38
39	acetyl-CoA acetyltransferase 2	ACAT2	-0.19	0.0236	0.116184	0.0838	-2.2634	1509.81
64746	acyl-CoA binding domain containing 3	ACBD3	-0.168	0.0117	0.0833441	0.0668	-2.52199	1277
107985353	ACBD3 antisense RNA 1	ACBD3-AS1	-0.177	0.045	0.159355	0.0884	-2.00419	127.07
79777	acyl-CoA binding domain containing 4	ACBD4	0.0648	0.488	0.654586	0.0935	0.693622	932.01
91452	acyl-CoA binding domain containing 5	ACBD5	-0.0349	0.635	0.766996	0.0736	-0.474224	2376.88
84320	acyl-CoA binding domain containing 6	ACBD6	-0.0283	0.459	0.630071	0.0382	-0.740249	692.9
414149	acyl-CoA binding domain containing 7	ACBD7	0.354	0.0258	0.121689	0.159	2.22848	2775.13
108949267	ACBD7-DCLRE1CP1 readthrough	ACBD7-DCLRE1CP1	0.389	0.0214	0.110629	0.169	2.30087	64.68
84680	1-aminocyclopropane-1-carboxylate synthase homolog (inactive)	ACCS	0.146	0.326	0.507367	0.1486	0.981476	225.12
65057	ACD shelterin complex subunit and telomerase recruitment factor	ACD	0.0289	0.762	0.854248	0.0954	0.303343	1328.45
1636	angiotensin I converting enzyme	ACE	-0.0216	0.834	0.89931	0.1033	-0.209482	626.56
340485	alkaline ceramidase 2	ACER2	0.4	0.0177	0.101057	0.1688	2.37175	318.72
55331	alkaline ceramidase 3	ACER3	-0.0196	0.828	0.894551	0.09	-0.217833	2506.19
43	acetylcholinesterase (Cartwright blood group)	ACHE	-0.158	0.266	0.445219	0.1416	-1.11336	3230.54
22985	apoptotic chromatin condensation inducer 1	ACIN1	0.0468	0.288	0.468449	0.044	1.06344	4164.89
2532	atypical chemokine receptor 1 (Duffy blood group)	ACKR1	0.0674	0.595	0.737878	0.1268	0.531528	519.04
1238	atypical chemokine receptor 2	ACKR2	0.187	0.147	0.310026	0.1291	1.44943	28.74
57007	atypical chemokine receptor 3	ACKR3	0.157	0.363	0.543065	0.1731	0.909167	233.08
51554	atypical chemokine receptor 4	ACKR4	0.202	0.225	0.401817	0.1662	1.2141	13.84
47	ATP citrate lyase	ACLY	-0.312	0.0176	0.100945	0.1315	-2.37308	5356.67
130013	aminocarboxymuconate semialdehyde decarboxylase	ACMSD	0.507	0.00727	0.0656799	0.189	2.68411	33.75
48	aconitase 1	ACO1	0.156	0.0491	0.166357	0.0792	1.96789	1127.44
50	aconitase 2	ACO2	-0.0545	0.586	0.731725	0.1001	-0.54413	14187.9
641371	acyl-CoA thioesterase 1	ACOT1	0.0566	0.508	0.67095	0.0854	0.662674	383.69
26027	acyl-CoA thioesterase 11	ACOT11	0.286	0.0365	0.14411	0.1368	2.09101	810.24
134526	acyl-CoA thioesterase 12	ACOT12	0.734	0.000114	0.0088618	0.1902	3.8588	25.38
55856	acyl-CoA thioesterase 13	ACOT13	0.00596	0.908	0.945789	0.0516	0.115405	689.84
10965	acyl-CoA thioesterase 2	ACOT2	0.0465	0.456	0.627264	0.0624	0.745923	534.23
122970	acyl-CoA thioesterase 4	ACOT4	0.0992	0.216	0.391606	0.0802	1.23613	182.82
641372	acyl-CoA thioesterase 6	ACOT6	0.603	0.000324	0.0139144	0.1677	3.59526	82.65
11332	acyl-CoA thioesterase 7	ACOT7	-0.214	0.0811	0.219943	0.1229	-1.74442	6755.36
10005	acyl-CoA thioesterase 8	ACOT8	-0.124	0.07	0.201947	0.0685	-1.81206	1106.3
23597	acyl-CoA thioesterase 9	ACOT9	0.00967	0.84	0.902886	0.0479	0.202174	830.32
51	acyl-CoA oxidase 1	ACOX1	0.00925	0.922	0.953987	0.0942	0.0981822	1995.8
8309	acyl-CoA oxidase 2	ACOX2	0.313	0.0385	0.14774	0.1514	2.06983	124.51
8310	acyl-CoA oxidase 3, pristanoyl	ACOX3	-0.117	0.0836	0.223691	0.0676	-1.7304	619.87
55289	acyl-CoA oxidase like	ACOXL	0.284	0.0278	0.125649	0.1293	2.19975	168.66
400997	ACOXL antisense RNA 1	ACOXL-AS1	0.129	0.457	0.628929	0.1742	0.743064	10.94
52	acid phosphatase 1	ACP1	-0.181	0.0611	0.187238	0.0965	-1.87296	1896.69
53	acid phosphatase 2, lysosomal	ACP2	-0.201	0.0288	0.128185	0.092	-2.18661	2158.29
93650	acid phosphatase 4	ACP4	0.266	0.0354	0.1418	0.1264	2.10368	27.74
54	acid phosphatase 5, tartrate resistant	ACP5	0.355	0.0347	0.140221	0.168	2.11219	39.02
51205	acid phosphatase 6, lysophosphatidic	ACP6	0.162	0.176	0.344577	0.12	1.35297	337.66
390928	acid phosphatase 7, tartrate resistant (putative)	ACP7	-0.0624	0.773	0.861638	0.2168	-0.287954	125.3
49	acrosin	ACR	0.0201	0.898	0.939313	0.1564	0.128434	26.37
84519	acrosin binding protein	ACRBP	0.268	0.101	0.247574	0.1632	1.64057	21.45
56	acrosomal vesicle protein 1	ACRV1	0.172	0.149	0.311775	0.1188	1.44413	40.54
23205	acyl-CoA synthetase bubblegum family member 1	ACSBG1	0.193	0.0669	0.196985	0.1051	1.83202	3474.78
81616	acyl-CoA synthetase bubblegum family member 2	ACSBG2	0.369	0.0205	0.108119	0.1594	2.31629	25.7
80221	acyl-CoA synthetase family member 2	ACSF2	0.242	0.0599	0.185748	0.1284	1.88117	320.04
197322	acyl-CoA synthetase family member 3	ACSF3	-0.119	0.103	0.250266	0.073	-1.63054	932.44
2180	acyl-CoA synthetase long chain family member 1	ACSL1	-0.165	0.11	0.259772	0.103	-1.59852	1543.25
2181	acyl-CoA synthetase long chain family member 3	ACSL3	-0.192	0.026	0.121705	0.0862	-2.22692	5493.85
2182	acyl-CoA synthetase long chain family member 4	ACSL4	-0.276	0.0538	0.174507	0.1429	-1.92865	3503.31
51703	acyl-CoA synthetase long chain family member 5	ACSL5	1.01	0.00018	0.0108866	0.2687	3.74602	448.7
23305	acyl-CoA synthetase long chain family member 6	ACSL6	-0.185	0.125	0.28036	0.1208	-1.53541	5069.85
101927693	ACSL6 antisense RNA 1	ACSL6-AS1	0.477	0.00255	0.0390641	0.1581	3.01721	32.81
6296	acyl-CoA synthetase medium chain family member 3	ACSM3	0.0995	0.338	0.518027	0.1038	0.958688	53.57
54988	acyl-CoA synthetase medium chain family member 5	ACSM5	0.153	0.368	0.547185	0.1701	0.90103	81.75
84532	acyl-CoA synthetase short chain family member 1	ACSS1	0.267	0.138	0.298186	0.1797	1.48329	3008.72
55902	acyl-CoA synthetase short chain family member 2	ACSS2	-0.132	0.0693	0.200942	0.0726	-1.81625	1606.5
79611	acyl-CoA synthetase short chain family member 3	ACSS3	0.113	0.0956	0.240457	0.068	1.66676	1547.31
58	actin alpha 1, skeletal muscle	ACTA1	0.0808	0.62	0.755948	0.1629	0.496207	84.95
59	actin alpha 2, smooth muscle	ACTA2	-0.411	0.103	0.249687	0.2515	-1.63284	1332.53
100132116	ACTA2 antisense RNA 1	ACTA2-AS1	-0.415	0.0798	0.217716	0.2369	-1.75174	479.36
60	actin beta	ACTB	-0.139	0.0294	0.129215	0.064	-2.17858	77854.3
70	actin alpha cardiac muscle 1	ACTC1	-0.102	0.48	0.647808	0.1437	-0.706513	101.07
71	actin gamma 1	ACTG1	-0.125	0.129	0.285568	0.0821	-1.52	49866.7
283693	actin gamma 1 pseudogene 17	ACTG1P17	0.361	0.0189	0.104206	0.1537	2.34825	27.51
644961	actin gamma 1 pseudogene 20	ACTG1P20	0.535	0.0303	0.131071	0.247	2.16666	152.53
148709	actin gamma 1 pseudogene 25	ACTG1P25	0.157	0.202	0.374036	0.1234	1.27595	42.16
648740	actin gamma 1 pseudogene 4	ACTG1P4	0.0992	0.487	0.6538	0.1426	0.695441	76.71
72	actin gamma 2, smooth muscle	ACTG2	-0.174	0.63	0.763225	0.3599	-0.482257	103.47
170487	actin like 10	ACTL10	-0.0672	0.698	0.811703	0.1732	-0.387796	24.96
86	actin like 6A	ACTL6A	0.0929	0.389	0.567173	0.1079	0.860767	198.82
51412	actin like 6B	ACTL6B	-0.21	0.0791	0.216642	0.1197	-1.75603	2882.27
284325	actin maturation protease	ACTMAP	0.0796	0.376	0.555858	0.09	0.884401	323.73
87	actinin alpha 1	ACTN1	-0.0923	0.299	0.480665	0.0889	-1.03765	6787.68
88	actinin alpha 2	ACTN2	-0.118	0.112	0.262473	0.0742	-1.58962	2867.41
89	actinin alpha 3	ACTN3	0.117	0.481	0.648725	0.166	0.704586	17.6
81	actinin alpha 4	ACTN4	-0.0246	0.741	0.840698	0.0744	-0.330478	11726.7
55860	actin related protein 10	ACTR10	-0.277	0.00845	0.0708611	0.1052	-2.63363	1971
10121	actin related protein 1A	ACTR1A	-0.161	0.0693	0.200864	0.0884	-1.81649	6459.66
10120	actin related protein 1B	ACTR1B	-0.152	0.0621	0.189057	0.0814	-1.86557	5796.63
10097	actin related protein 2	ACTR2	-0.273	0.00875	0.0719686	0.1042	-2.62164	8810.22
10096	actin related protein 3	ACTR3	-0.174	0.0326	0.135943	0.0816	-2.13724	3415.24
101060091	ACTR3 antisense RNA 1	ACTR3-AS1	0.331	0.0198	0.106386	0.1423	2.32922	34.61
57180	actin related protein 3B	ACTR3B	-0.25	0.041	0.152359	0.1226	-2.0433	2108.67
653857	actin related protein 3C	ACTR3C	0.108	0.0937	0.237471	0.0646	1.67635	1533.73
79913	actin related protein 5	ACTR5	0.00916	0.869	0.92105	0.0554	0.165179	265.16
64431	actin related protein 6	ACTR6	-0.14	0.056	0.178355	0.0731	-1.91072	650.23
93973	actin related protein 8	ACTR8	-0.0392	0.655	0.781844	0.0878	-0.44677	1456.86
84517	actin related protein T3	ACTRT3	-0.325	0.00628	0.0609055	0.1191	-2.73258	62.86
90	activin A receptor type 1	ACVR1	-0.0404	0.576	0.723854	0.0721	-0.559963	698.45
91	activin A receptor type 1B	ACVR1B	-0.133	0.183	0.3529	0.0998	-1.33268	4570.08
130399	activin A receptor type 1C	ACVR1C	-0.279	0.0565	0.179244	0.1463	-1.9071	569.63
92	activin A receptor type 2A	ACVR2A	-0.154	0.115	0.26711	0.0979	-1.57537	757.7
93	activin A receptor type 2B	ACVR2B	0.00476	0.949	0.970626	0.0742	0.0640941	914.55
100128640	ACVR2B antisense RNA 1	ACVR2B-AS1	0.125	0.24	0.418057	0.1065	1.1758	40.92
94	activin A receptor like type 1	ACVRL1	0.661	0.00113	0.0262766	0.2029	3.25627	841.88
95	aminoacylase 1	ACY1	0.0813	0.344	0.524417	0.0859	0.946336	165.39
91703	aminoacylase 3	ACY3	-0.609	0.0481	0.164389	0.3082	-1.97635	83.88
97	acylphosphatase 1	ACYP1	0.096	0.322	0.503109	0.097	0.989833	222.75
98	acylphosphatase 2	ACYP2	0.0102	0.895	0.93691	0.0771	0.132352	884.79
100	adenosine deaminase	ADA	0.266	0.187	0.357615	0.2019	1.32024	224.74
51816	adenosine deaminase 2	ADA2	0.231	0.0415	0.153195	0.1133	2.03885	621.1
161931	adenosine deaminase domain containing 2	ADAD2	-0.27	0.207	0.380362	0.2142	-1.26208	147.71
161823	adenosine deaminase like	ADAL	0.00775	0.923	0.954568	0.0799	0.0969108	438.13
102	ADAM metallopeptidase domain 10	ADAM10	-0.145	0.0949	0.239303	0.0865	-1.67012	2306.45
4185	ADAM metallopeptidase domain 11	ADAM11	-0.187	0.127	0.284039	0.1226	-1.52481	10121.8
8038	ADAM metallopeptidase domain 12	ADAM12	0.274	0.0223	0.11286	0.1198	2.28445	112.1
8751	ADAM metallopeptidase domain 15	ADAM15	0.162	0.153	0.317109	0.1132	1.42895	3265.19
6868	ADAM metallopeptidase domain 17	ADAM17	0.128	0.134	0.292504	0.0853	1.49931	654.93
8728	ADAM metallopeptidase domain 19	ADAM19	-0.184	0.101	0.247574	0.1121	-1.64062	759.96
8748	ADAM metallopeptidase domain 20	ADAM20	0.493	0.00189	0.0334675	0.1587	3.10756	220.47
317760	ADAM metallopeptidase domain 20 pseudogene 1	ADAM20P1	0.303	0.0107	0.0802353	0.1187	2.55129	50.64
8747	ADAM metallopeptidase domain 21	ADAM21	0.0728	0.552	0.705101	0.1224	0.594828	36.44
53616	ADAM metallopeptidase domain 22	ADAM22	-0.346	0.0144	0.0920973	0.1415	-2.44618	4578.97
8745	ADAM metallopeptidase domain 23	ADAM23	-0.323	0.024	0.117431	0.1434	-2.25639	4647.09
10863	ADAM metallopeptidase domain 28	ADAM28	-0.47	0.017	0.0991486	0.1969	-2.38564	119.52
203102	ADAM metallopeptidase domain 32	ADAM32	0.413	0.016	0.0964837	0.1716	2.40872	40.23
80332	ADAM metallopeptidase domain 33	ADAM33	0.188	0.316	0.497227	0.1878	1.00224	649.37
101929294	ADAM7, ADAMDEC1 and ADAM28 antisense RNA 1	ADAM7-AS1	-0.24	0.195	0.366312	0.1852	-1.29616	11.48
101	ADAM metallopeptidase domain 8	ADAM8	0.0677	0.632	0.764643	0.1414	0.479246	174.72
8754	ADAM metallopeptidase domain 9	ADAM9	-0.137	0.128	0.28507	0.0898	-1.52143	1353.49
9510	ADAM metallopeptidase with thrombospondin type 1 motif 1	ADAMTS1	0.523	0.0425	0.15499	0.2579	2.02824	1428.44
81794	ADAM metallopeptidase with thrombospondin type 1 motif 10	ADAMTS10	0.0298	0.828	0.895084	0.1375	0.2169	2713.69
81792	ADAM metallopeptidase with thrombospondin type 1 motif 12	ADAMTS12	0.158	0.37	0.549487	0.1765	0.896462	16.23
11093	ADAM metallopeptidase with thrombospondin type 1 motif 13	ADAMTS13	-0.136	0.246	0.425401	0.117	-1.15906	1377.6
140766	ADAM metallopeptidase with thrombospondin type 1 motif 14	ADAMTS14	-0.379	0.146	0.307891	0.2609	-1.45475	341.41
170689	ADAM metallopeptidase with thrombospondin type 1 motif 15	ADAMTS15	-0.0477	0.774	0.861971	0.166	-0.287221	100.51
170690	ADAM metallopeptidase with thrombospondin type 1 motif 16	ADAMTS16	-0.0619	0.701	0.813631	0.1612	-0.384171	296.14
101929176	ADAMTS16 divergent transcript	ADAMTS16-DT	0.287	0.0561	0.178524	0.1503	1.91015	79.47
170691	ADAM metallopeptidase with thrombospondin type 1 motif 17	ADAMTS17	0.145	0.206	0.379585	0.1147	1.2641	251.17
170692	ADAM metallopeptidase with thrombospondin type 1 motif 18	ADAMTS18	0.207	0.648	0.776209	0.4534	0.457131	109.01
171019	ADAM metallopeptidase with thrombospondin type 1 motif 19	ADAMTS19	0.391	0.00522	0.0560242	0.14	2.79309	199.6
103689846	ADAMTS19 antisense RNA 1	ADAMTS19-AS1	-0.324	0.0516	0.170658	0.1665	-1.9464	19.12
9509	ADAM metallopeptidase with thrombospondin type 1 motif 2	ADAMTS2	0.216	0.124	0.279251	0.1406	1.5388	504.22
9508	ADAM metallopeptidase with thrombospondin type 1 motif 3	ADAMTS3	-0.302	0.0548	0.17627	0.1574	-1.92039	303.59
9507	ADAM metallopeptidase with thrombospondin type 1 motif 4	ADAMTS4	0.134	0.551	0.7046	0.2242	0.595615	2415.18
11096	ADAM metallopeptidase with thrombospondin type 1 motif 5	ADAMTS5	-0.206	0.0984	0.24435	0.1249	-1.65267	104.33
11174	ADAM metallopeptidase with thrombospondin type 1 motif 6	ADAMTS6	0.23	0.132	0.290919	0.1528	1.50481	58.94
11173	ADAM metallopeptidase with thrombospondin type 1 motif 7	ADAMTS7	0.382	0.0332	0.137168	0.1794	2.12994	228.05
390660	ADAMTS7 pseudogene 1	ADAMTS7P1	0.047	0.776	0.863815	0.1657	0.283918	347.19
11095	ADAM metallopeptidase with thrombospondin type 1 motif 8	ADAMTS8	-0.316	0.0196	0.106209	0.1354	-2.33305	1249.8
56999	ADAM metallopeptidase with thrombospondin type 1 motif 9	ADAMTS9	1.76	0.000232	0.0118222	0.477	3.68122	824.47
101929335	ADAMTS9 antisense RNA 1	ADAMTS9-AS1	0.685	0.00525	0.0562175	0.2456	2.791	86.67
100507098	ADAMTS9 antisense RNA 2	ADAMTS9-AS2	0.141	0.294	0.475497	0.1344	1.04851	71.28
92949	ADAMTS like 1	ADAMTSL1	-0.515	0.0012	0.0270325	0.1592	-3.23774	174.65
9719	ADAMTS like 2	ADAMTSL2	-0.185	0.19	0.361262	0.141	-1.31	2867.42
57188	ADAMTS like 3	ADAMTSL3	0.0312	0.596	0.738519	0.0589	0.530088	220.76
54507	ADAMTS like 4	ADAMTSL4	0.488	0.0055	0.0575476	0.1757	2.77596	206.77
574406	ADAMTSL4 antisense RNA 1	ADAMTSL4-AS1	0.619	0.000355	0.0143409	0.1734	3.57123	22.02
100289061	ADAMTSL4 antisense RNA 2	ADAMTSL4-AS2	0.122	0.423	0.598314	0.1527	0.80179	30.26
339366	ADAMTS like 5	ADAMTSL5	0.329	0.00859	0.0713592	0.1252	2.62777	110.61
11033	ArfGAP with dual PH domains 1	ADAP1	-0.0645	0.593	0.736037	0.1206	-0.534921	10638.7
55803	ArfGAP with dual PH domains 2	ADAP2	0.105	0.414	0.590172	0.1282	0.817414	316.68
103	adenosine deaminase RNA specific	ADAR	-0.27	0.015	0.0938041	0.1109	-2.43129	9463.98
104	adenosine deaminase RNA specific B1	ADARB1	-0.225	0.0313	0.133156	0.1045	-2.15371	4027.99
105	adenosine deaminase RNA specific B2 (inactive)	ADARB2	-0.074	0.561	0.712679	0.1275	-0.580791	2678.63
642394	ADARB2 antisense RNA 1	ADARB2-AS1	0.196	0.408	0.584341	0.2363	0.828108	59.95
23536	adenosine deaminase tRNA specific 1	ADAT1	-0.121	0.0473	0.162688	0.0608	-1.98401	1229.82
134637	adenosine deaminase tRNA specific 2	ADAT2	-0.0309	0.697	0.810318	0.0792	-0.389976	178.18
113179	adenosine deaminase tRNA specific 3	ADAT3	0.123	0.446	0.618704	0.1609	0.762008	134.06
57143	aarF domain containing kinase 1	ADCK1	-0.213	0.0114	0.0827626	0.0843	-2.52988	629.34
90956	aarF domain containing kinase 2	ADCK2	-0.287	0.0171	0.0991486	0.1205	-2.38561	1244.6
203054	aarF domain containing kinase 5	ADCK5	0.0306	0.748	0.844835	0.0952	0.321622	558.9
107	adenylate cyclase 1	ADCY1	-0.258	0.0634	0.191317	0.139	-1.85613	27075.9
55811	adenylate cyclase 10	ADCY10	0.729	0.000657	0.0195059	0.2138	3.40686	52.97
221442	ADCY10 pseudogene 1	ADCY10P1	0.0453	0.769	0.858818	0.1542	0.293555	228.56
108	adenylate cyclase 2	ADCY2	-0.0788	0.425	0.600096	0.0987	-0.798128	8665.04
109	adenylate cyclase 3	ADCY3	-0.209	0.083	0.223049	0.1203	-1.73332	3771.06
196883	adenylate cyclase 4	ADCY4	0.41	0.00679	0.063321	0.1513	2.70705	422.59
111	adenylate cyclase 5	ADCY5	-0.173	0.193	0.364062	0.133	-1.30232	10961.8
112	adenylate cyclase 6	ADCY6	-0.0729	0.302	0.483332	0.0706	-1.03206	2720.03
113	adenylate cyclase 7	ADCY7	-0.198	0.191	0.362461	0.1512	-1.30679	801.65
114	adenylate cyclase 8	ADCY8	-0.0691	0.455	0.627151	0.0926	-0.746285	724.08
115	adenylate cyclase 9	ADCY9	-0.165	0.0724	0.205905	0.092	-1.79644	2156.2
116	adenylate cyclase activating polypeptide 1	ADCYAP1	0.0888	0.627	0.761415	0.1827	0.485935	869.53
117	ADCYAP receptor type I	ADCYAP1R1	0.047	0.702	0.814226	0.1228	0.382867	7472.04
118	adducin 1	ADD1	-0.188	0.0131	0.0877091	0.076	-2.48035	18555.7
119	adducin 2	ADD2	-0.233	0.0598	0.18557	0.1237	-1.88239	13693.6
120	adducin 3	ADD3	0.198	0.18	0.349572	0.148	1.33972	5549.31
100505933	ADD3 antisense RNA 1	ADD3-AS1	0.0847	0.418	0.593798	0.1044	0.810725	79.76
84435	adhesion G protein-coupled receptor A1	ADGRA1	-0.115	0.315	0.495546	0.1144	-1.00568	6655.08
100128127	ADGRA1 antisense RNA 1	ADGRA1-AS1	-0.0424	0.736	0.837192	0.1256	-0.337715	153.07
25960	adhesion G protein-coupled receptor A2	ADGRA2	0.0105	0.946	0.96896	0.1546	0.0676226	2407.69
166647	adhesion G protein-coupled receptor A3	ADGRA3	0.314	0.0745	0.209508	0.1763	1.78382	1107.93
575	adhesion G protein-coupled receptor B1	ADGRB1	-0.0741	0.57	0.719587	0.1305	-0.567795	19613.9
576	adhesion G protein-coupled receptor B2	ADGRB2	-0.192	0.17	0.337983	0.1402	-1.37094	41542.4
577	adhesion G protein-coupled receptor B3	ADGRB3	-0.159	0.195	0.365981	0.1224	-1.29697	3590.98
101928307	ADGRB3 divergent transcript	ADGRB3-DT	0.365	0.0182	0.102671	0.1547	2.36054	430.16
283383	adhesion G protein-coupled receptor D1	ADGRD1	0.272	0.0699	0.201733	0.15	1.81283	266.37
30817	adhesion G protein-coupled receptor E2	ADGRE2	0.376	0.0609	0.186905	0.2008	1.87445	121.36
976	adhesion G protein-coupled receptor E5	ADGRE5	0.0258	0.84	0.903105	0.1276	0.201763	431.14
165082	adhesion G protein-coupled receptor F3	ADGRF3	-0.141	0.144	0.305215	0.0962	-1.46265	58.82
221395	adhesion G protein-coupled receptor F5	ADGRF5	0.0448	0.712	0.821769	0.1214	0.369032	1564.67
9289	adhesion G protein-coupled receptor G1	ADGRG1	0.296	0.0752	0.210763	0.1665	1.77896	7233.44
10149	adhesion G protein-coupled receptor G2	ADGRG2	0.253	0.104	0.251056	0.1553	1.6281	32.53
222487	adhesion G protein-coupled receptor G3	ADGRG3	0.458	0.00554	0.05772	0.1651	2.77406	1013.95
221188	adhesion G protein-coupled receptor G5	ADGRG5	0.0949	0.647	0.775604	0.207	0.458491	18.34
57211	adhesion G protein-coupled receptor G6	ADGRG6	0.171	0.289	0.470539	0.161	1.05925	104.69
22859	adhesion G protein-coupled receptor L1	ADGRL1	-0.0766	0.45	0.622063	0.1013	-0.756208	32636.7
100507373	ADGRL1 antisense RNA 1	ADGRL1-AS1	-0.127	0.251	0.430294	0.1107	-1.147	1499.17
23266	adhesion G protein-coupled receptor L2	ADGRL2	-0.093	0.395	0.572278	0.1094	-0.850614	2578.13
23284	adhesion G protein-coupled receptor L3	ADGRL3	-0.206	0.102	0.249363	0.1259	-1.63439	4457
101927186	ADGRL3 antisense RNA 1	ADGRL3-AS1	0.0113	0.909	0.946083	0.0985	0.1148	35.42
64123	adhesion G protein-coupled receptor L4	ADGRL4	0.543	0.0078	0.0682645	0.2041	2.66073	263.05
84059	adhesion G protein-coupled receptor V1	ADGRV1	0.289	0.148	0.311424	0.1997	1.4449	2155.06
125	alcohol dehydrogenase 1B (class I), beta polypeptide	ADH1B	0.8	0.00129	0.0279623	0.2486	3.21821	27.76
128	alcohol dehydrogenase 5 (class III), chi polypeptide	ADH5	-0.0378	0.636	0.767051	0.0798	-0.473993	1939.86
137872	alcohol dehydrogenase iron containing 1	ADHFE1	0.43	0.00316	0.0436923	0.1455	2.95191	578.05
55256	acireductone dioxygenase 1	ADI1	0.113	0.18	0.349067	0.084	1.3415	923.94
51094	adiponectin receptor 1	ADIPOR1	-0.113	0.0829	0.222883	0.0654	-1.73407	2574.47
79602	adiponectin receptor 2	ADIPOR2	0.0665	0.635	0.766401	0.1399	0.475262	3961.82
10974	adipogenesis regulatory factor	ADIRF	0.365	0.0447	0.158711	0.182	2.0079	133.34
132	adenosine kinase	ADK	-0.0163	0.787	0.871158	0.0605	-0.269665	633.05
133	adrenomedullin	ADM	0.954	0.0187	0.103801	0.4059	2.35095	141.21
199800	adrenomedullin 5 (putative)	ADM5	0.176	0.229	0.406568	0.1466	1.20253	53.21
105376544	ADM divergent transcript	ADM-DT	0.309	0.154	0.31847	0.2171	1.42448	10.75
23394	activity dependent neuroprotector homeobox	ADNP	-0.153	0.073	0.206794	0.0854	-1.7927	2856.61
22850	ADNP homeobox 2	ADNP2	-0.236	0.0216	0.111192	0.1026	-2.29661	852.9
101927631	ADNP antisense RNA 1	ADNP-AS1	0.247	0.00579	0.059037	0.0896	2.75921	47.45
84890	2-aminoethanethiol dioxygenase	ADO	-0.345	0.00104	0.0250537	0.1053	-3.27855	1319.31
134	adenosine A1 receptor	ADORA1	-0.167	0.0774	0.214034	0.0947	-1.76575	4934.4
135	adenosine A2a receptor	ADORA2A	0.324	0.0382	0.147095	0.1564	2.07304	220.34
646023	ADORA2A antisense RNA 1	ADORA2A-AS1	0.387	0.016	0.0964837	0.1608	2.4088	38.88
136	adenosine A2b receptor	ADORA2B	0.585	0.000841	0.0223486	0.1752	3.33903	251.18
140	adenosine A3 receptor	ADORA3	-0.31	0.196	0.367046	0.2397	-1.29409	35.91
83440	ADP dependent glucokinase	ADPGK	-0.145	0.00616	0.0603433	0.0528	-2.73901	708.55
100287559	ADPGK antisense RNA 1	ADPGK-AS1	-0.0697	0.457	0.628769	0.0938	-0.743482	38.37
141	ADP-ribosylarginine hydrolase	ADPRH	0.0977	0.475	0.64358	0.1367	0.714722	79.72
113622	ADP-ribosylhydrolase like 1	ADPRHL1	-0.103	0.302	0.483161	0.0999	-1.03248	287.69
56985	ADP-ribose/CDP-alcohol diphosphatase, manganese dependent	ADPRM	0.133	0.0756	0.211226	0.075	1.77694	99.63
54936	ADP-ribosylserine hydrolase	ADPRS	-0.0617	0.319	0.499996	0.0618	-0.997166	946.36
148	adrenoceptor alpha 1A	ADRA1A	0.0795	0.34	0.520401	0.0833	0.954192	1033.69
147	adrenoceptor alpha 1B	ADRA1B	-0.176	0.145	0.307016	0.1211	-1.45755	1849.33
146	adrenoceptor alpha 1D	ADRA1D	-0.357	0.0649	0.193701	0.1937	-1.84561	478.2
150	adrenoceptor alpha 2A	ADRA2A	0.001	0.995	0.996765	0.1477	0.0067679	682.1
151	adrenoceptor alpha 2B	ADRA2B	0.0597	0.792	0.873786	0.227	0.263138	58.12
152	adrenoceptor alpha 2C	ADRA2C	0.149	0.377	0.556142	0.1691	0.883731	564.73
153	adrenoceptor beta 1	ADRB1	0.165	0.256	0.435219	0.1457	1.13505	766.12
154	adrenoceptor beta 2	ADRB2	0.163	0.372	0.551044	0.183	0.893362	59.67
155	adrenoceptor beta 3	ADRB3	0.0855	0.669	0.791159	0.1997	0.428108	10.5
11047	ADRM1 26S proteasome ubiquitin receptor	ADRM1	-0.0663	0.495	0.660012	0.0971	-0.682264	1955.94
158	adenylosuccinate lyase	ADSL	-0.0935	0.0909	0.234367	0.0553	-1.69051	754.39
122622	adenylosuccinate synthase 1	ADSS1	0.0587	0.567	0.716928	0.1026	0.572279	218.09
159	adenylosuccinate synthase 2	ADSS2	-0.212	0.0252	0.120054	0.0945	-2.23805	1514.74
84830	androgen dependent TFPI regulating protein	ADTRP	-0.0644	0.66	0.785256	0.1463	-0.440004	234.33
165	AE binding protein 1	AEBP1	0.199	0.368	0.54801	0.2209	0.899469	2730.02
121536	AE binding protein 2	AEBP2	-0.0643	0.194	0.365583	0.0495	-1.29802	1057.6
64782	apoptosis enhancing nuclease	AEN	0.0493	0.67	0.792296	0.1158	0.425938	356.42
60312	actin filament associated protein 1	AFAP1	-0.205	0.0247	0.11899	0.0913	-2.24555	1871.62
84740	AFAP1 antisense RNA 1	AFAP1-AS1	-0.313	0.00541	0.0569951	0.1126	-2.78146	135.75
134265	actin filament associated protein 1 like 1	AFAP1L1	0.427	0.00897	0.0728799	0.1635	2.61323	216.55
84632	actin filament associated protein 1 like 2	AFAP1L2	-0.0983	0.245	0.423179	0.0845	-1.16373	1544.33
4301	afadin, adherens junction formation factor	AFDN	0.0194	0.71	0.820563	0.052	0.372007	4415.66
653483	AFDN divergent transcript	AFDN-DT	0.365	0.000468	0.0162559	0.1044	3.49848	55.88
4299	ALF transcription elongation factor 1	AFF1	0.000278	0.998	0.998737	0.0943	0.0029426	1017.44
100506746	AFF1 antisense RNA 1	AFF1-AS1	0.305	0.0261	0.121916	0.137	2.22482	198.66
2334	ALF transcription elongation factor 2	AFF2	-0.307	0.102	0.249241	0.1876	-1.63535	1267.91
3899	ALF transcription elongation factor 3	AFF3	-0.25	0.0251	0.119753	0.1117	-2.24018	3642.73
27125	ALF transcription elongation factor 4	AFF4	-0.0825	0.348	0.528492	0.0879	-0.939251	4497.4
246269	AFG1 like ATPase	AFG1L	-0.0957	0.291	0.472441	0.0907	-1.05506	214.41
172	AFG3 like matrix AAA peptidase subunit 1, pseudogene	AFG3L1P	0.275	0.0298	0.130096	0.1267	2.17337	760.31
10939	AFG3 like matrix AAA peptidase subunit 2	AFG3L2	-0.219	0.0104	0.0787194	0.0855	-2.56384	1814.09
125061	arylformamidase	AFMID	0.0823	0.543	0.699244	0.1355	0.607689	652.17
54812	aftiphilin	AFTPH	-0.132	0.0475	0.162996	0.0667	-1.98217	2400.06
101927402	AFTPH divergent transcript	AFTPH-DT	-0.0144	0.907	0.945157	0.1234	-0.116493	47.51
175	aspartylglucosaminidase	AGA	-0.252	0.037	0.145098	0.1209	-2.08537	264.55
285500	AGA divergent transcript	AGA-DT	0.0784	0.693	0.807577	0.1984	0.39535	19.87
116987	ArfGAP with GTPase domain, ankyrin repeat and PH domain 1	AGAP1	-0.176	0.0904	0.233708	0.1039	-1.69349	16755.5
653234	ArfGAP with GTPase domain, ankyrin repeat and PH domain 10, pseudogene	AGAP10P	0.278	0.0153	0.0948276	0.1148	2.42445	138.99
119385	ArfGAP with GTPase domain, ankyrin repeat and PH domain 11	AGAP11	0.357	0.00632	0.0609381	0.1307	2.73091	274.42
414224	ArfGAP with GTPase domain, ankyrin repeat and PH domain 12, pseudogene	AGAP12P	0.229	0.119	0.27227	0.1467	1.55919	220.26
100506749	AGAP1 intronic transcript 1	AGAP1-IT1	0.265	0.166	0.332274	0.1913	1.38584	12.95
116986	ArfGAP with GTPase domain, ankyrin repeat and PH domain 2	AGAP2	-0.166	0.313	0.493948	0.165	-1.00898	38608
100130776	AGAP2 antisense RNA 1	AGAP2-AS1	-0.0936	0.476	0.644832	0.1315	-0.712007	5899.4
116988	ArfGAP with GTPase domain, ankyrin repeat and PH domain 3	AGAP3	-0.0402	0.751	0.846986	0.1267	-0.317133	24510.1
119016	ArfGAP with GTPase domain, ankyrin repeat and PH domain 4	AGAP4	0.296	0.00644	0.0617036	0.1085	2.72427	255.28
729092	ArfGAP with GTPase domain, ankyrin repeat and PH domain 5	AGAP5	0.254	0.0273	0.124725	0.1153	2.20649	124.05
414189	ArfGAP with GTPase domain, ankyrin repeat and PH domain 6	AGAP6	0.263	0.014	0.0905542	0.1071	2.45839	282.15
653268	ArfGAP with GTPase domain, ankyrin repeat and PH domain 7, pseudogene	AGAP7P	0.315	0.0129	0.0871536	0.1266	2.48521	306.46
642517	ArfGAP with GTPase domain, ankyrin repeat and PH domain 9	AGAP9	0.289	0.0744	0.209386	0.1619	1.78442	204.58
123624	AGBL carboxypeptidase 1	AGBL1	-0.136	0.385	0.563132	0.1561	-0.868627	284.55
79841	AGBL carboxypeptidase 2	AGBL2	0.738	0.0078	0.0682645	0.2774	2.66053	15.81
340351	AGBL carboxypeptidase 3	AGBL3	0.142	0.075	0.210357	0.0799	1.7806	138.22
84871	AGBL carboxypeptidase 4	AGBL4	-0.269	0.0134	0.0888325	0.1087	-2.47194	641.36
60509	AGBL carboxypeptidase 5	AGBL5	-0.0182	0.789	0.872021	0.0678	-0.267967	1363.95
177	advanced glycosylation end-product specific receptor	AGER	0.28	0.0797	0.217515	0.1598	1.75255	162.46
3267	ArfGAP with FG repeats 1	AGFG1	-0.193	0.0306	0.13172	0.0895	-2.16278	2567.95
3268	ArfGAP with FG repeats 2	AGFG2	-0.0381	0.647	0.775953	0.0832	-0.457756	1668.95
55109	angiogenic factor with G-patch and FHA domains 1	AGGF1	-0.106	0.282	0.462886	0.098	-1.07674	2107.13
55750	acylglycerol kinase	AGK	-0.119	0.0368	0.144699	0.0569	-2.08842	3189.02
105375538	AGK divergent transcript	AGK-DT	0.522	0.00361	0.046381	0.1792	2.91022	34.82
178	amylo-alpha-1, 6-glucosidase, 4-alpha-glucanotransferase	AGL	-0.0374	0.763	0.855137	0.1242	-0.301263	1166.55
79814	agmatinase	AGMAT	-0.0913	0.448	0.621026	0.1204	-0.75844	179.33
392636	alkylglycerol monooxygenase	AGMO	0.14	0.561	0.712495	0.2407	0.581172	15.65
26523	argonaute RISC component 1	AGO1	-0.0873	0.165	0.331659	0.0629	-1.38736	2753.71
27161	argonaute RISC catalytic component 2	AGO2	-0.0222	0.805	0.881438	0.0899	-0.246962	2448.04
192669	argonaute RISC catalytic component 3	AGO3	0.0778	0.321	0.502392	0.0784	0.991459	2368.88
192670	argonaute RISC component 4	AGO4	0.0898	0.189	0.3601	0.0683	1.31367	1017.14
10554	1-acylglycerol-3-phosphate O-acyltransferase 1	AGPAT1	-0.164	0.0509	0.169321	0.0838	-1.95204	7019.53
10555	1-acylglycerol-3-phosphate O-acyltransferase 2	AGPAT2	0.191	0.0873	0.229261	0.1119	1.70977	471.42
56894	1-acylglycerol-3-phosphate O-acyltransferase 3	AGPAT3	-0.0921	0.106	0.255476	0.0571	-1.61432	6813.13
56895	1-acylglycerol-3-phosphate O-acyltransferase 4	AGPAT4	-0.243	0.00484	0.0539991	0.0861	-2.81757	2945.84
79992	AGPAT4 intronic transcript 1	AGPAT4-IT1	0.408	0.0305	0.13172	0.1885	2.16313	442.99
55326	1-acylglycerol-3-phosphate O-acyltransferase 5	AGPAT5	-0.0576	0.466	0.635992	0.079	-0.728993	1590.82
8540	alkylglycerone phosphate synthase	AGPS	-0.199	0.0479	0.163884	0.1008	-1.97848	1226.02
375790	agrin	AGRN	-0.204	0.2	0.37153	0.1588	-1.28182	17873.1
181	agouti related neuropeptide	AGRP	0.181	0.139	0.299119	0.1224	1.47989	30.18
183	angiotensinogen	AGT	0.356	0.0936	0.237397	0.2122	1.67669	5283.29
23287	ATP/GTP binding carboxypeptidase 1	AGTPBP1	-0.176	0.0564	0.179051	0.0922	-1.90826	2958.57
57085	angiotensin II receptor associated protein	AGTRAP	0.153	0.267	0.446735	0.1377	1.11036	259.68
25909	AT-hook containing transcription factor 1	AHCTF1	0.0649	0.449	0.621521	0.0857	0.757077	1278.7
285116	AT-hook containing transcription factor 1 pseudogene 1	AHCTF1P1	0.0348	0.726	0.831149	0.0993	0.350191	313.09
191	adenosylhomocysteinase	AHCY	-0.18	0.0786	0.215834	0.1026	-1.75877	2401.41
10768	adenosylhomocysteinase like 1	AHCYL1	0.207	0.134	0.2926	0.138	1.49907	12548.6
23382	adenosylhomocysteinase like 2	AHCYL2	-0.006	0.95	0.971354	0.0961	-0.0624626	2774.77
27245	AT-hook DNA binding motif containing 1	AHDC1	-0.0169	0.861	0.916285	0.0966	-0.175148	7567.16
54806	Abelson helper integration site 1	AHI1	0.453	0.00149	0.0299961	0.1426	3.17745	4184.53
100131814	AHI1 divergent transcript	AHI1-DT	0.238	0.03	0.130859	0.1098	2.16945	42.53
79026	AHNAK nucleoprotein	AHNAK	0.12	0.322	0.502944	0.1207	0.9903	8035.61
113146	AHNAK nucleoprotein 2	AHNAK2	-0.285	0.0444	0.158334	0.1417	-2.01027	4885.29
196	aryl hydrocarbon receptor	AHR	-0.152	0.131	0.288377	0.1004	-1.51207	481.02
57491	aryl hydrocarbon receptor repressor	AHRR	-0.0538	0.588	0.733186	0.0994	-0.54123	510.04
10598	activator of HSP90 ATPase activity 1	AHSA1	-0.0694	0.248	0.426593	0.0601	-1.15632	2435.16
130872	activator of HSP90 ATPase homolog 2, pseudogene	AHSA2P	0.193	0.112	0.262473	0.1217	1.58947	1487.8
197	alpha 2-HS glycoprotein	AHSG	-0.122	0.466	0.635888	0.167	-0.729208	9.38
64853	axin interactor, dorsalization associated	AIDA	-0.178	0.0384	0.147543	0.0861	-2.07087	1500.78
199	allograft inflammatory factor 1	AIF1	-0.365	0.121	0.274583	0.2353	-1.55241	54.6
83543	allograft inflammatory factor 1 like	AIF1L	0.293	0.12	0.273969	0.1883	1.55447	6527.41
9131	apoptosis inducing factor mitochondria associated 1	AIFM1	-0.127	0.0385	0.147772	0.0614	-2.06909	615.34
84883	apoptosis inducing factor mitochondria associated 2	AIFM2	0.349	0.000375	0.0145656	0.0981	3.557	364.87
150209	apoptosis inducing factor mitochondria associated 3	AIFM3	0.195	0.0984	0.244375	0.1179	1.65251	2643.19
51390	androgen induced 1	AIG1	0.0736	0.106	0.254366	0.0455	1.61768	1562.64
9255	aminoacyl tRNA synthetase complex interacting multifunctional protein 1	AIMP1	0.101	0.239	0.417506	0.086	1.17736	751.22
7965	aminoacyl tRNA synthetase complex interacting multifunctional protein 2	AIMP2	-0.00246	0.958	0.97555	0.0462	-0.0531438	326.12
9049	aryl hydrocarbon receptor interacting protein	AIP	-0.0313	0.714	0.822786	0.0854	-0.366965	1249.34
326	autoimmune regulator	AIRE	0.255	0.147	0.30981	0.1755	1.44997	219.53
100271873	antisense of IGF2R non-protein coding RNA	AIRN	0.0801	0.565	0.71492	0.1391	0.576093	33.17
55966	adherens junctions associated protein 1	AJAP1	-0.231	0.0644	0.192738	0.1247	-1.84908	4609.93
389813	apical junction component 1 homolog	AJM1	-0.221	0.269	0.448677	0.1994	-1.1065	4991.83
84962	ajuba LIM protein	AJUBA	0.158	0.319	0.500038	0.1583	0.99683	97.79
107984660	AJUBA divergent transcript	AJUBA-DT	0.313	0.037	0.144952	0.1499	2.08632	26.59
203	adenylate kinase 1	AK1	0.0455	0.577	0.72502	0.0816	0.557741	2948.36
204	adenylate kinase 2	AK2	0.14	0.0552	0.176974	0.0728	1.91697	906.51
50808	adenylate kinase 3	AK3	0.121	0.21	0.383838	0.0963	1.25411	1502.37
205	adenylate kinase 4	AK4	0.0136	0.909	0.946425	0.1193	0.114162	3120.28
26289	adenylate kinase 5	AK5	-0.33	0.0214	0.110674	0.1433	-2.30023	14148.2
102157402	adenylate kinase 6	AK6	-0.0471	0.437	0.610873	0.0605	-0.777428	331.02
122481	adenylate kinase 7	AK7	0.0689	0.425	0.600229	0.0864	0.797747	118.99
158067	adenylate kinase 8	AK8	0.0252	0.766	0.856879	0.0846	0.297345	99.45
221264	adenylate kinase 9	AK9	0.0767	0.405	0.582058	0.0921	0.832553	698.34
642597	A-kinase anchor inhibitor 1	AKAIN1	-0.592	0.00177	0.0327803	0.1892	-3.12598	36.79
8165	A-kinase anchoring protein 1	AKAP1	-0.0155	0.826	0.894134	0.0705	-0.21931	2592.31
11216	A-kinase anchoring protein 10	AKAP10	-0.148	0.0918	0.235286	0.0879	-1.6858	1328.27
11215	A-kinase anchoring protein 11	AKAP11	-0.316	0.0401	0.150776	0.154	-2.05276	12349.2
9590	A-kinase anchoring protein 12	AKAP12	0.103	0.383	0.561393	0.1178	0.87259	14295.5
11214	A-kinase anchoring protein 13	AKAP13	0.0548	0.46	0.630598	0.0741	0.739164	3046.11
158798	A-kinase anchoring protein 14	AKAP14	0.0992	0.614	0.751089	0.1965	0.504939	8.22
8227	A-kinase anchoring protein 17A	AKAP17A	-0.0978	0.268	0.448663	0.0884	-1.10666	1470.03
10566	A-kinase anchoring protein 3	AKAP3	0.0359	0.832	0.897565	0.1694	0.212156	71.09
9495	A-kinase anchoring protein 5	AKAP5	-0.218	0.146	0.307847	0.1501	-1.45544	1738.81
9472	A-kinase anchoring protein 6	AKAP6	-0.313	0.00981	0.0763952	0.121	-2.58259	10397.5
9465	A-kinase anchoring protein 7	AKAP7	0.104	0.35	0.531183	0.1114	0.934038	666.04
10270	A-kinase anchoring protein 8	AKAP8	0.0446	0.462	0.632145	0.0606	0.736006	950.02
26993	A-kinase anchoring protein 8 like	AKAP8L	0.119	0.108	0.257713	0.0742	1.60563	2578.71
10142	A-kinase anchoring protein 9	AKAP9	0.182	0.05	0.167595	0.0929	1.95972	11439.5
56672	A-kinase interacting protein 1	AKIP1	-0.0676	0.159	0.323727	0.048	-1.40935	418.77
79647	akirin 1	AKIRIN1	-0.0211	0.794	0.874803	0.0807	-0.261119	2943.85
55122	akirin 2	AKIRIN2	-0.226	0.0289	0.128374	0.1033	-2.18527	1422.88
80709	AT-hook transcription factor	AKNA	0.00445	0.967	0.980929	0.1083	0.0410879	1436.1
254268	AKNA domain containing 1	AKNAD1	0.298	0.131	0.288552	0.1971	1.51156	14.38
10327	aldo-keto reductase family 1 member A1	AKR1A1	-0.13	0.0735	0.20777	0.0729	-1.78959	940.61
231	aldo-keto reductase family 1 member B	AKR1B1	-0.15	0.0542	0.175205	0.0779	-1.92517	2467.65
1645	aldo-keto reductase family 1 member C1	AKR1C1	-0.144	0.183	0.353227	0.1082	-1.33149	298.26
1646	aldo-keto reductase family 1 member C2	AKR1C2	-0.0474	0.712	0.82165	0.1283	-0.369306	210.76
8644	aldo-keto reductase family 1 member C3	AKR1C3	0.146	0.249	0.427609	0.1264	1.15349	134.43
83592	aldo-keto reductase family 1 member E2	AKR1E2	0.191	0.0386	0.148017	0.0924	2.06804	106.65
8574	aldo-keto reductase family 7 member A2	AKR7A2	0.138	0.0402	0.150811	0.0673	2.05207	1380.14
246182	AKR7A2 pseudogene 1	AKR7A2P1	0.432	0.0169	0.0985173	0.1807	2.38972	21.51
22977	aldo-keto reductase family 7 member A3	AKR7A3	0.148	0.141	0.301533	0.1001	1.47319	111.77
246181	aldo-keto reductase family 7 like (gene/pseudogene)	AKR7L	0.233	0.0134	0.088662	0.0942	2.47361	92.19
207	AKT serine/threonine kinase 1	AKT1	-0.0512	0.561	0.712151	0.0879	-0.582087	5086.34
84335	AKT1 substrate 1	AKT1S1	-0.0629	0.512	0.673507	0.0958	-0.656392	1781.46
208	AKT serine/threonine kinase 2	AKT2	0.152	0.0512	0.169846	0.0782	1.95009	3131.87
10000	AKT serine/threonine kinase 3	AKT3	-0.191	0.0745	0.209508	0.1071	-1.78383	4561.59
64400	AKT interacting protein	AKTIP	-0.109	0.195	0.366596	0.0843	-1.29553	2842.54
210	aminolevulinate dehydratase	ALAD	0.142	0.145	0.306748	0.0976	1.45863	4237.17
211	5'-aminolevulinate synthase 1	ALAS1	-0.223	0.0122	0.0848422	0.0889	-2.50708	1312.5
212	5'-aminolevulinate synthase 2	ALAS2	1.06	0.0105	0.0793453	0.415	2.55771	21.06
213	albumin	ALB	0.425	0.0123	0.0851151	0.1696	2.50361	23.49
214	activated leukocyte cell adhesion molecule	ALCAM	-0.232	0.0668	0.196794	0.1265	-1.8328	4045.86
126133	aldehyde dehydrogenase 16 family member A1	ALDH16A1	-0.244	0.0372	0.145364	0.1173	-2.08384	531.11
5832	aldehyde dehydrogenase 18 family member A1	ALDH18A1	-0.0782	0.181	0.35106	0.0585	-1.33658	909.92
216	aldehyde dehydrogenase 1 family member A1	ALDH1A1	-0.0165	0.9	0.940626	0.1311	-0.125843	855.78
8854	aldehyde dehydrogenase 1 family member A2	ALDH1A2	-0.197	0.07	0.201935	0.1088	-1.81215	170.6
220	aldehyde dehydrogenase 1 family member A3	ALDH1A3	-0.0734	0.36	0.540469	0.0802	-0.915097	257.38
101927751	ALDH1A3 antisense RNA 1	ALDH1A3-AS1	-0.159	0.132	0.290312	0.1055	-1.50652	730.44
219	aldehyde dehydrogenase 1 family member B1	ALDH1B1	-0.283	0.0249	0.119414	0.1261	-2.24233	379.37
10840	aldehyde dehydrogenase 1 family member L1	ALDH1L1	0.328	0.107	0.255761	0.2035	1.61344	1963.38
100874204	ALDH1L1 antisense RNA 1	ALDH1L1-AS1	0.388	0.0394	0.149349	0.1883	2.05972	80.89
100862662	ALDH1L1 antisense RNA 2	ALDH1L1-AS2	0.19	0.232	0.410558	0.1594	1.19412	97.7
160428	aldehyde dehydrogenase 1 family member L2	ALDH1L2	0.146	0.0549	0.176352	0.076	1.92002	389.1
217	aldehyde dehydrogenase 2 family member	ALDH2	0.177	0.0878	0.230052	0.1037	1.7072	9374.79
218	aldehyde dehydrogenase 3 family member A1	ALDH3A1	0.0694	0.592	0.735768	0.1294	0.536079	30.62
224	aldehyde dehydrogenase 3 family member A2	ALDH3A2	-0.139	0.0708	0.203144	0.0772	-1.80695	1638.87
221	aldehyde dehydrogenase 3 family member B1	ALDH3B1	0.119	0.335	0.515065	0.1234	0.964759	163.5
8659	aldehyde dehydrogenase 4 family member A1	ALDH4A1	0.366	0.0178	0.101333	0.1545	2.36935	3713.48
7915	aldehyde dehydrogenase 5 family member A1	ALDH5A1	-0.104	0.255	0.43326	0.0912	-1.13938	3368.17
4329	aldehyde dehydrogenase 6 family member A1	ALDH6A1	0.257	0.0578	0.181719	0.1355	1.89736	4349.48
501	aldehyde dehydrogenase 7 family member A1	ALDH7A1	0.251	0.0455	0.160038	0.1253	1.99958	2784.22
64577	aldehyde dehydrogenase 8 family member A1	ALDH8A1	0.345	0.0786	0.215834	0.1961	1.75893	123.31
223	aldehyde dehydrogenase 9 family member A1	ALDH9A1	0.171	0.083	0.222979	0.0986	1.73366	2098.38
226	aldolase, fructose-bisphosphate A	ALDOA	-0.142	0.223	0.399965	0.1163	-1.21787	31163.5
229	aldolase, fructose-bisphosphate B	ALDOB	0.178	0.287	0.46833	0.167	1.06381	53.67
230	aldolase, fructose-bisphosphate C	ALDOC	0.0851	0.369	0.548677	0.0947	0.89827	26240
56052	ALG1 chitobiosyldiphosphodolichol beta-mannosyltransferase	ALG1	-0.0433	0.538	0.695242	0.0702	-0.616284	415.96
84920	ALG10 alpha-1,2-glucosyltransferase	ALG10	-0.161	0.124	0.279117	0.1048	-1.53934	214.69
144245	ALG10 alpha-1,2-glucosyltransferase B	ALG10B	-0.0871	0.47	0.638835	0.1205	-0.72288	290.16
440138	ALG11 alpha-1,2-mannosyltransferase	ALG11	-0.022	0.838	0.901302	0.1074	-0.205011	1302.66
79087	ALG12 alpha-1,6-mannosyltransferase	ALG12	-0.0484	0.51	0.672685	0.0735	-0.658539	1232.76
79868	ALG13 UDP-N-acetylglucosaminyltransferase subunit	ALG13	-0.117	0.0836	0.223691	0.0677	-1.7304	737.37
199857	ALG14 UDP-N-acetylglucosaminyltransferase subunit	ALG14	-0.00434	0.938	0.964253	0.0558	-0.0777435	331.57
200810	ALG1 like 1, pseudogene	ALG1L1P	0.239	0.0287	0.12812	0.1095	2.18704	116.2
644974	ALG1 chitobiosyldiphosphodolichol beta-mannosyltransferase like 2	ALG1L2	0.104	0.315	0.496146	0.1034	1.00451	29.35
285407	ALG1 like 9, pseudogene	ALG1L9P	0.0861	0.363	0.543145	0.0948	0.908927	222.86
85365	ALG2 alpha-1,3/1,6-mannosyltransferase	ALG2	-0.0749	0.239	0.417506	0.0636	-1.17746	526.62
10195	ALG3 alpha-1,3- mannosyltransferase	ALG3	0.0713	0.13	0.287189	0.0471	1.51538	409.17
29880	ALG5 dolichyl-phosphate beta-glucosyltransferase	ALG5	0.0153	0.846	0.907195	0.0788	0.193778	140.18
29929	ALG6 alpha-1,3-glucosyltransferase	ALG6	0.0579	0.497	0.661286	0.0852	0.679889	124.64
79053	ALG8 alpha-1,3-glucosyltransferase	ALG8	-0.0146	0.765	0.856281	0.049	-0.298567	389.69
79796	ALG9 alpha-1,2-mannosyltransferase	ALG9	-0.17	0.0158	0.0959725	0.0706	-2.41357	932.89
238	ALK receptor tyrosine kinase	ALK	-0.334	0.00393	0.0483411	0.1157	-2.88382	575.57
285016	ALK and LTK ligand 2	ALKAL2	0.232	0.148	0.310388	0.1603	1.44836	70.62
8846	alkB homolog 1, histone H2A dioxygenase	ALKBH1	-0.0678	0.291	0.471717	0.0642	-1.05658	211.13
121642	alkB homolog 2, alpha-ketoglutarate dependent dioxygenase	ALKBH2	-0.00707	0.932	0.960244	0.0831	-0.085133	168.19
221120	alkB homolog 3, alpha-ketoglutarate dependent dioxygenase	ALKBH3	0.0317	0.716	0.824624	0.0873	0.363599	316.86
100507300	ALKBH3 antisense RNA 1	ALKBH3-AS1	0.196	0.144	0.305978	0.134	1.46028	20.17
54784	alkB homolog 4, lysine demethylase	ALKBH4	-0.139	0.105	0.252634	0.0854	-1.62317	584.77
54890	alkB homolog 5, RNA demethylase	ALKBH5	-0.156	0.0431	0.155938	0.077	-2.02268	4735.44
84964	alkB homolog 6	ALKBH6	0.102	0.294	0.475076	0.0974	1.04941	564.43
84266	alkB homolog 7	ALKBH7	-0.0211	0.841	0.903594	0.1049	-0.20084	467.47
91801	alkB homolog 8, tRNA methyltransferase	ALKBH8	-0.175	0.0395	0.149393	0.0848	-2.0592	320.07
55821	allantoicase	ALLC	0.309	0.104	0.251883	0.1899	1.62577	11.88
7840	ALMS1 centrosome and basal body associated protein	ALMS1	0.106	0.162	0.327358	0.0756	1.39825	998.31
100874291	ALMS1 intronic transcript 1	ALMS1-IT1	0.634	0.00415	0.0498893	0.2212	2.86675	23.46
200420	ALMS1 pseudogene 1	ALMS1P1	0.29	0.078	0.214998	0.1647	1.76235	44.96
239	arachidonate 12-lipoxygenase, 12S type	ALOX12	0.5	0.00218	0.0358946	0.1631	3.06394	332.57
100506713	ALOX12 antisense RNA 1	ALOX12-AS1	0.266	0.0198	0.106386	0.1142	2.33046	50.79
242	arachidonate 12-lipoxygenase, 12R type	ALOX12B	-0.0421	0.774	0.861694	0.1464	-0.28779	65.85
245	arachidonate 12-lipoxygenase pseudogene 2	ALOX12P2	0.307	0.0204	0.107808	0.1322	2.31901	171.02
246	arachidonate 15-lipoxygenase	ALOX15	0.36	0.112	0.263309	0.2267	1.58715	20.82
247	arachidonate 15-lipoxygenase type B	ALOX15B	0.0464	0.827	0.894486	0.2125	0.218258	53.1
100652883	arachidonate 15-lipoxygenase pseudogene 1	ALOX15P1	-0.129	0.269	0.449371	0.1171	-1.10472	31.22
240	arachidonate 5-lipoxygenase	ALOX5	-0.0695	0.748	0.845014	0.2165	-0.321085	140.7
241	arachidonate 5-lipoxygenase activating protein	ALOX5AP	-0.422	0.134	0.292885	0.2819	-1.49839	31.76
59344	arachidonate lipoxygenase 3	ALOXE3	0.0809	0.482	0.649187	0.115	0.703647	80.34
80216	alpha kinase 1	ALPK1	0.167	0.171	0.338599	0.1221	1.36943	108.17
115701	alpha kinase 2	ALPK2	0.076	0.699	0.812551	0.197	0.386082	16.86
57538	alpha kinase 3	ALPK3	-0.0456	0.689	0.80475	0.114	-0.400441	584.13
249	alkaline phosphatase, biomineralization associated	ALPL	-0.000516	0.997	0.998531	0.1466	-0.0035175	1809.52
57679	alsin Rho guanine nucleotide exchange factor ALS2	ALS2	-0.191	0.0372	0.145364	0.0915	-2.08382	1902.08
259173	ALS2 C-terminal like	ALS2CL	0.194	0.244	0.42204	0.1667	1.16621	1008.1
257	ALX homeobox 3	ALX3	-0.00353	0.964	0.979427	0.0793	-0.0445868	146.83
60529	ALX homeobox 4	ALX4	-0.0638	0.694	0.808263	0.1618	-0.393996	82.64
10189	Aly/REF export factor	ALYREF	-0.0988	0.319	0.499996	0.0991	-0.997245	306.31
23600	alpha-methylacyl-CoA racemase	AMACR	-0.0458	0.715	0.823543	0.1252	-0.365669	318.57
55626	autophagy and beclin 1 regulator 1	AMBRA1	-0.193	0.0195	0.105863	0.0827	-2.33543	2160.64
262	adenosylmethionine decarboxylase 1	AMD1	-0.253	0.00268	0.0400519	0.0843	-3.00263	3496.24
144193	amidohydrolase domain containing 1	AMDHD1	0.139	0.453	0.625435	0.1853	0.749882	16.21
51005	amidohydrolase domain containing 2	AMDHD2	-0.0347	0.766	0.856541	0.1165	-0.297891	1412.31
139285	APC membrane recruitment protein 1	AMER1	-0.186	0.0667	0.196619	0.1016	-1.8335	350.83
219287	APC membrane recruitment protein 2	AMER2	-0.134	0.359	0.539049	0.1457	-0.917909	7047.09
205147	APC membrane recruitment protein 3	AMER3	-0.222	0.0797	0.217594	0.1265	-1.75227	1704.62
267	autocrine motility factor receptor	AMFR	-0.18	0.0484	0.165173	0.0913	-1.97357	4852.39
268	anti-Mullerian hormone	AMH	0.0878	0.687	0.803763	0.2181	0.402454	315.9
57463	adhesion molecule with Ig like domain 1	AMIGO1	-0.323	0.0242	0.117884	0.1432	-2.25421	4193.13
347902	adhesion molecule with Ig like domain 2	AMIGO2	-0.28	0.0861	0.227525	0.1631	-1.71648	342.77
386724	adhesion molecule with Ig like domain 3	AMIGO3	0.209	0.0641	0.192464	0.1127	1.85126	341.62
9949	AMMECR nuclear protein 1	AMMECR1	0.182	0.0267	0.123448	0.0823	2.21566	157.8
83607	AMMECR1 like	AMMECR1L	-0.0245	0.524	0.6836	0.0384	-0.637388	657.92
81693	amnion associated transmembrane protein	AMN	0.118	0.0569	0.180103	0.0618	1.90414	2092.1
196394	antagonist of mitotic exit network 1 homolog	AMN1	-0.0792	0.213	0.387425	0.0635	-1.24592	987.34
154796	angiomotin	AMOT	0.139	0.378	0.55722	0.1571	0.881601	2551.64
154810	angiomotin like 1	AMOTL1	-0.203	0.0636	0.191472	0.1093	-1.85511	2283.94
51421	angiomotin like 2	AMOTL2	-0.21	0.0637	0.191732	0.1133	-1.85435	3145.71
271	adenosine monophosphate deaminase 2	AMPD2	-0.215	0.111	0.261566	0.1352	-1.59262	8767.24
272	adenosine monophosphate deaminase 3	AMPD3	-0.11	0.359	0.538892	0.1203	-0.918219	772.9
273	amphiphysin	AMPH	-0.28	0.0767	0.212889	0.1582	-1.7704	7838.67
275	aminomethyltransferase	AMT	0.263	0.00831	0.0702995	0.0998	2.63911	547.7
276	amylase alpha 1A	AMY1A	0.342	0.0436	0.156801	0.1694	2.01762	37.82
277	amylase alpha 1B	AMY1B	0.446	0.0223	0.112636	0.195	2.28578	24.89
278	amylase alpha 1C	AMY1C	0.405	0.0189	0.104368	0.1727	2.34686	33.73
279	amylase alpha 2A	AMY2A	0.372	0.0187	0.103794	0.1581	2.35183	83.54
280	amylase alpha 2B	AMY2B	0.367	0.00781	0.0682963	0.1379	2.66012	453.06
155185	archaelysin family metallopeptidase 1	AMZ1	0.188	0.0915	0.235097	0.1116	1.68737	1215.98
51321	archaelysin family metallopeptidase 2	AMZ2	-0.12	0.0549	0.176352	0.0623	-1.92001	2300.5
201283	AMZ2 pseudogene 1	AMZ2P1	-0.13	0.074	0.208838	0.0727	-1.78646	659.83
64682	anaphase promoting complex subunit 1	ANAPC1	-0.247	0.037	0.145029	0.1182	-2.08594	1170.12
10393	anaphase promoting complex subunit 10	ANAPC10	-0.0901	0.16	0.325805	0.0642	-1.40352	172.24
51529	anaphase promoting complex subunit 11	ANAPC11	0.0212	0.842	0.904178	0.1063	0.199592	494.76
25847	anaphase promoting complex subunit 13	ANAPC13	-0.11	0.137	0.296914	0.0737	-1.48755	1352.56
25906	anaphase promoting complex subunit 15	ANAPC15	0.0105	0.892	0.935839	0.0773	0.135361	347.23
119504	anaphase promoting complex subunit 16	ANAPC16	0.143	0.0398	0.150164	0.0695	2.05572	698.16
100286979	ANAPC1 pseudogene 1	ANAPC1P1	-0.291	0.106	0.254702	0.1802	-1.61645	33.9
285074	ANAPC1 pseudogene 2	ANAPC1P2	-0.148	0.088	0.230268	0.087	-1.70582	216.62
730268	ANAPC1 pseudogene 4	ANAPC1P4	-0.141	0.137	0.296598	0.095	-1.48849	174.81
402096	ANAPC1 pseudogene 6	ANAPC1P6	-0.249	0.163	0.328576	0.1786	-1.39498	15.24
29882	anaphase promoting complex subunit 2	ANAPC2	-0.176	0.0711	0.203724	0.0978	-1.80458	3188.99
29945	anaphase promoting complex subunit 4	ANAPC4	0.00137	0.981	0.988558	0.0561	0.0244145	499.9
51433	anaphase promoting complex subunit 5	ANAPC5	-0.182	0.0072	0.0654003	0.0675	-2.68746	3579.24
51434	anaphase promoting complex subunit 7	ANAPC7	-0.122	0.0321	0.134934	0.0569	-2.14351	1751.16
283	angiogenin	ANG	0.327	0.0201	0.107239	0.1406	2.32377	19.86
23357	angel homolog 1	ANGEL1	-0.0453	0.446	0.618314	0.0593	-0.762908	1947.62
90806	angel homolog 2	ANGEL2	-0.0392	0.571	0.720491	0.0692	-0.56605	1016.28
284	angiopoietin 1	ANGPT1	-0.0526	0.753	0.848105	0.167	-0.315146	147.36
285	angiopoietin 2	ANGPT2	0.996	0.00227	0.0366578	0.3264	3.05212	271.75
51378	angiopoietin 4	ANGPT4	0.0167	0.917	0.950968	0.1596	0.10451	24.32
9068	angiopoietin like 1	ANGPTL1	-0.0444	0.811	0.885274	0.1863	-0.238564	66.89
23452	angiopoietin like 2	ANGPTL2	-0.0866	0.579	0.726637	0.1561	-0.554552	698.76
51129	angiopoietin like 4	ANGPTL4	1.1	0.00437	0.0514778	0.3865	2.85018	836.74
83854	angiopoietin like 6	ANGPTL6	0.15	0.0666	0.196422	0.0817	1.83452	463.7
10218	angiopoietin like 7	ANGPTL7	0.0228	0.912	0.94847	0.2067	0.110298	15.16
55908	angiopoietin like 8	ANGPTL8	0.44	0.0205	0.108038	0.1898	2.31706	21.64
286	ankyrin 1	ANK1	-0.453	0.00119	0.0269161	0.1398	-3.24247	1691.7
287	ankyrin 2	ANK2	-0.28	0.0494	0.166829	0.1424	-1.96517	38551.3
105377373	ANK2 antisense RNA 1	ANK2-AS1	0.912	0.00252	0.0388695	0.302	3.02144	59.26
288	ankyrin 3	ANK3	-0.204	0.0437	0.156958	0.101	-2.01659	13118.8
150709	ankyrin and armadillo repeat containing	ANKAR	0.262	0.00865	0.0715678	0.0998	2.62572	169.01
348094	ankyrin repeat and death domain containing 1A	ANKDD1A	0.217	0.0122	0.08501	0.0865	2.505	700.49
728780	ankyrin repeat and death domain containing 1B	ANKDD1B	0.45	0.00391	0.0482871	0.1559	2.88557	29.26
63926	ankyrin repeat and EF-hand domain containing 1	ANKEF1	-0.0155	0.858	0.914714	0.0867	-0.178701	99.86
162282	ankyrin repeat and fibronectin type III domain containing 1	ANKFN1	0.436	0.00661	0.0624349	0.1606	2.71584	215.28
51479	ankyrin repeat and FYVE domain containing 1	ANKFY1	-0.121	0.172	0.340333	0.0884	-1.36497	3428.82
56172	ANKH inorganic pyrophosphate transport regulator	ANKH	-0.189	0.0175	0.100451	0.0794	-2.37636	7020.04
54882	ankyrin repeat and KH domain containing 1	ANKHD1	0.153	0.0179	0.101651	0.0648	2.3673	2360.95
404734	ANKHD1-EIF4EBP3 readthrough	ANKHD1-EIF4EBP3	0.157	0.0156	0.0957414	0.0648	2.4173	2333.65
54467	ankyrin repeat and IBR domain containing 1	ANKIB1	0.028	0.814	0.887124	0.1192	0.234843	3865.25
255239	ankyrin repeat and kinase domain containing 1	ANKK1	0.336	0.0981	0.244181	0.2034	1.65391	28.21
126549	ankyrin repeat and LEM domain containing 1	ANKLE1	0.221	0.0758	0.21163	0.1246	1.77557	99.59
23141	ankyrin repeat and LEM domain containing 2	ANKLE2	-0.128	0.0317	0.134239	0.0597	-2.1481	1455.55
51281	ankyrin repeat and MYND domain containing 1	ANKMY1	-0.00157	0.981	0.988812	0.066	-0.0237686	525.05
57037	ankyrin repeat and MYND domain containing 2	ANKMY2	-0.27	0.0198	0.106386	0.1157	-2.32995	1173.33
57763	ankyrin repeat family A member 2	ANKRA2	-0.0545	0.371	0.550523	0.0609	-0.894689	362.46
55608	ankyrin repeat domain 10	ANKRD10	0.229	0.0378	0.146437	0.1104	2.07717	2628.48
29123	ankyrin repeat domain containing 11	ANKRD11	0.122	0.195	0.366284	0.0942	1.29629	18175
23253	ankyrin repeat domain 12	ANKRD12	0.183	0.0118	0.0836315	0.0726	2.51917	9372.91
88455	ankyrin repeat domain 13A	ANKRD13A	0.022	0.772	0.860935	0.0761	0.289462	1041.62
124930	ankyrin repeat domain 13B	ANKRD13B	-0.00403	0.969	0.981665	0.1032	-0.0390762	3248.47
81573	ankyrin repeat domain 13C	ANKRD13C	-0.169	0.0461	0.161045	0.0846	-1.99408	1166.44
338692	ankyrin repeat domain 13D	ANKRD13D	-0.00443	0.968	0.981457	0.1114	-0.0397614	3840.19
54522	ankyrin repeat domain 16	ANKRD16	0.00501	0.951	0.971949	0.0817	0.0612819	771.46
26057	ankyrin repeat domain 17	ANKRD17	-0.0756	0.387	0.565218	0.0874	-0.864234	10347.6
102724832	ANKRD17 divergent transcript	ANKRD17-DT	0.263	0.0582	0.182341	0.1387	1.89413	29.19
253650	ankyrin repeat domain 18A	ANKRD18A	0.447	0.0455	0.159972	0.2236	2.0003	1626.22
441459	ankyrin repeat domain 18B	ANKRD18B	0.66	0.000506	0.0171499	0.1898	3.47774	614.16
101926917	ankyrin repeat domain 18C, pseudogene	ANKRD18CP	0.383	0.0339	0.138781	0.1805	2.12102	369.23
348840	ankyrin repeat domain 18D, pseudogene	ANKRD18DP	0.0741	0.605	0.744942	0.1432	0.51724	119.22
138649	ankyrin repeat domain 19, pseudogene	ANKRD19P	0.348	0.00319	0.0439598	0.1179	2.94891	937.14
26287	ankyrin repeat domain 2	ANKRD2	0.163	0.308	0.489545	0.1596	1.01901	69.3
84210	ankyrin repeat domain 20 family member A1	ANKRD20A1	0.807	2.77e-05	0.0053807	0.1925	4.19171	591.57
391267	ankyrin repeat domain 20 family member A11, pseudogene	ANKRD20A11P	1.09	0.00174	0.0323627	0.3476	3.13218	36.44
100874392	ankyrin repeat domain 20 family member A12, pseudogene	ANKRD20A12P	0.541	0.0618	0.188685	0.2895	1.8674	20.32
400110	ankyrin repeat domain 20 family member A19, pseudogene	ANKRD20A19P	0.504	0.117	0.269989	0.3218	1.56605	103.83
102723552	ankyrin repeat domain 20 family member A21, pseudogene	ANKRD20A21P	0.635	0.00641	0.0614724	0.2329	2.72623	34.89
441430	ankyrin repeat domain 20 family member A2, pseudogene	ANKRD20A2P	0.786	4.38e-05	0.0059575	0.1924	4.08669	726.94
441425	ankyrin repeat domain 20 family member A3, pseudogene	ANKRD20A3P	0.734	5.01e-05	0.0062521	0.1811	4.05498	803.92
110006327	ANKRD20A4-ANKRD20A20P readthrough	ANKRD20A4-ANKRD20A20P	0.817	2.47e-06	0.0025855	0.1734	4.71052	571.44
728747	ankyrin repeat domain 20 family member A4, pseudogene	ANKRD20A4P	0.822	6.74e-06	0.0029856	0.1827	4.50161	286.59
440482	ankyrin repeat domain 20 family member A5, pseudogene	ANKRD20A5P	0.849	0.000225	0.0117485	0.2301	3.68875	458.74
729171	ankyrin repeat domain 20 family member A8, pseudogene	ANKRD20A8P	0.827	3.22e-05	0.005381	0.199	4.15744	247.68
284232	ankyrin repeat domain 20 family member A9, pseudogene	ANKRD20A9P	1	7.84e-05	0.0077367	0.2538	3.94922	62.68
200539	ankyrin repeat domain 23	ANKRD23	0.106	0.219	0.395144	0.086	1.22832	473.34
170961	ankyrin repeat domain 24	ANKRD24	0.0391	0.711	0.821518	0.1058	0.370035	4078.28
22852	ankyrin repeat domain containing 26	ANKRD26	0.393	0.000528	0.0175587	0.1133	3.46623	3077.68
100101938	ankyrin repeat domain 26 pseudogene 3	ANKRD26P3	0.995	0.00828	0.0701767	0.3769	2.64052	210.79
84079	ankyrin repeat domain 27	ANKRD27	-0.0747	0.22	0.39631	0.0609	-1.22577	1588.83
23243	ankyrin repeat domain 28	ANKRD28	-0.146	0.0679	0.198536	0.0797	-1.82544	2389.89
147463	ankyrin repeat domain 29	ANKRD29	-0.11	0.191	0.361998	0.0838	-1.30793	620.54
91074	ankyrin repeat domain 30A	ANKRD30A	0.586	0.0425	0.154966	0.289	2.02885	17.15
374860	ankyrin repeat domain 30B	ANKRD30B	0.749	0.000138	0.0094137	0.1964	3.81134	246.06
554226	ankyrin repeat domain 30B like	ANKRD30BL	0.605	0.00135	0.0286863	0.1887	3.20497	228.53
149992	ankyrin repeat domain 30B pseudogene 2	ANKRD30BP2	0.649	0.00136	0.0287191	0.2027	3.20292	21.64
256006	ankyrin repeat domain 31	ANKRD31	0.434	0.0145	0.0921819	0.1775	2.4455	43.99
341405	ankyrin repeat domain 33	ANKRD33	0.243	0.277	0.457911	0.2232	1.08672	9.91
651746	ankyrin repeat domain 33B	ANKRD33B	-0.0665	0.661	0.785772	0.1514	-0.438887	3530.28
284615	ankyrin repeat domain 34A	ANKRD34A	-0.294	0.0505	0.168521	0.1505	-1.95557	3147.36
340120	ankyrin repeat domain 34B	ANKRD34B	-0.0383	0.766	0.856541	0.1285	-0.297891	49.65
390616	ankyrin repeat domain 34C	ANKRD34C	-0.402	0.0424	0.154935	0.1981	-2.02931	349.64
729911	ANKRD34C antisense RNA 1	ANKRD34C-AS1	-0.11	0.439	0.611984	0.1417	-0.774537	73.07
148741	ankyrin repeat domain 35	ANKRD35	0.104	0.214	0.388326	0.0833	1.24381	366.72
375248	ankyrin repeat domain 36	ANKRD36	0.777	6.72e-05	0.0071659	0.1948	3.98586	3550.48
57730	ankyrin repeat domain 36B	ANKRD36B	0.716	0.000189	0.0111175	0.1919	3.73274	2848.06
84832	ankyrin repeat domain 36B pseudogene 1	ANKRD36BP1	-0.0795	0.611	0.749005	0.1561	-0.509111	73.08
645784	ankyrin repeat domain 36B pseudogene 2	ANKRD36BP2	0.411	0.0323	0.135399	0.1919	2.14044	170.88
400986	ankyrin repeat domain 36C	ANKRD36C	0.646	0.000939	0.0236626	0.1952	3.30817	2903.01
353322	ankyrin repeat domain 37	ANKRD37	0.22	0.0684	0.199321	0.1207	1.82256	132.44
51239	ankyrin repeat domain 39	ANKRD39	-0.0556	0.476	0.644798	0.0781	-0.712093	369.22
91369	ankyrin repeat domain 40	ANKRD40	0.29	0.0707	0.202992	0.1602	1.80747	7184.58
338699	ankyrin repeat domain 42	ANKRD42	-0.12	0.102	0.248907	0.0731	-1.63631	1036.73
100506282	ANKRD42 divergent transcript	ANKRD42-DT	0.384	0.00178	0.0328025	0.1229	3.12491	133.11
91526	ankyrin repeat domain 44	ANKRD44	-0.0349	0.712	0.821522	0.0944	-0.369822	551.44
101927547	ANKRD44 intronic transcript 1	ANKRD44-IT1	0.312	0.117	0.26906	0.1986	1.56867	17.21
339416	ankyrin repeat domain 45	ANKRD45	0.0431	0.702	0.814146	0.1125	0.383095	156.08
157567	ankyrin repeat domain 46	ANKRD46	-0.287	0.00976	0.0762048	0.1113	-2.58415	2313.87
54851	ankyrin repeat domain 49	ANKRD49	0.0872	0.177	0.345778	0.0646	1.34979	207.22
57182	ankyrin repeat domain containing 50	ANKRD50	-0.309	0.0252	0.119946	0.1379	-2.23893	1539.36
283373	ankyrin repeat domain 52	ANKRD52	-0.201	0.05	0.167615	0.1027	-1.95954	5549.74
79998	ankyrin repeat domain 53	ANKRD53	0.164	0.018	0.10185	0.0692	2.36603	304.31
129138	ankyrin repeat domain 54	ANKRD54	0.0259	0.747	0.844633	0.0805	0.32211	1763.51
79722	ankyrin repeat domain 55	ANKRD55	-0.227	0.0671	0.197356	0.1238	-1.83083	89.62
22881	ankyrin repeat domain 6	ANKRD6	-0.102	0.407	0.583465	0.1233	-0.829742	1667.44
100310846	ankyrin repeat domain 61	ANKRD61	0.511	0.00108	0.0256641	0.1564	3.26787	27.06
342850	ankyrin repeat domain 62	ANKRD62	1.12	0.000103	0.0085702	0.289	3.88279	84.2
23783	ANKRD62P1-PARP4P3 readthrough, transcribed pseudogene	ANKRD62P1-PARP4P3	0.534	0.0274	0.124876	0.2421	2.2058	29.7
100131244	ankyrin repeat domain 63	ANKRD63	-0.118	0.541	0.697459	0.1926	-0.611886	460.62
441869	ankyrin repeat domain 65	ANKRD65	0.0346	0.78	0.866207	0.1236	0.279853	929.33
105378585	ANKRD65 antisense RNA 1	ANKRD65-AS1	0.191	0.202	0.374408	0.1498	1.27508	52.52
100287718	ankyrin repeat domain 66	ANKRD66	-0.507	0.0171	0.099324	0.2126	-2.38384	13.04
56311	ankyrin repeat domain 7	ANKRD7	-0.129	0.471	0.640202	0.1787	-0.720386	14.68
122416	ankyrin repeat domain 9	ANKRD9	0.0416	0.686	0.802889	0.103	0.404265	2637.82
23294	ankyrin repeat and sterile alpha motif domain containing 1A	ANKS1A	-0.204	0.0297	0.130096	0.0937	-2.17376	3295.92
56899	ankyrin repeat and sterile alpha motif domain containing 1B	ANKS1B	-0.0196	0.656	0.782368	0.0439	-0.445568	8700.71
124401	ankyrin repeat and sterile alpha motif domain containing 3	ANKS3	0.13	0.234	0.412146	0.1094	1.19046	1062.91
257629	ankyrin repeat and sterile alpha motif domain containing 4B	ANKS4B	0.527	0.00965	0.0757332	0.2038	2.58809	24.24
203286	ankyrin repeat and sterile alpha motif domain containing 6	ANKS6	0.0235	0.788	0.871739	0.0877	0.268447	898.53
55139	ankyrin repeat and zinc finger peptidyl tRNA hydrolase 1	ANKZF1	0.00829	0.937	0.963444	0.1048	0.0791534	912.05
54443	anillin, actin binding protein	ANLN	-0.052	0.811	0.885062	0.2176	-0.238918	3235.14
55107	anoctamin 1	ANO1	-0.148	0.215	0.389953	0.1192	-1.23985	191.09
55129	anoctamin 10	ANO10	-0.0152	0.738	0.838651	0.0455	-0.334606	1116.45
57101	anoctamin 2	ANO2	0.839	0.000123	0.0088761	0.2185	3.84085	122.28
63982	anoctamin 3	ANO3	-0.244	0.114	0.265898	0.1545	-1.57895	1911.61
121601	anoctamin 4	ANO4	-0.18	0.026	0.121761	0.0807	-2.22608	769.54
203859	anoctamin 5	ANO5	-0.164	0.13	0.288268	0.1086	-1.51251	1044.43
196527	anoctamin 6	ANO6	0.229	0.0751	0.210491	0.1284	1.77996	568.26
50636	anoctamin 7	ANO7	0.0607	0.497	0.661453	0.0893	0.679361	347.21
101927546	anoctamin 7 like 1 (pseudogene)	ANO7L1	0.277	0.0126	0.0860528	0.1109	2.49545	51.58
57719	anoctamin 8	ANO8	0.0352	0.791	0.87303	0.1328	0.2649	3688.69
338440	anoctamin 9	ANO9	0.472	0.0104	0.0790223	0.1845	2.56084	28.86
3730	anosmin 1	ANOS1	7.75e-05	1	0.999796	0.1852	0.0004185	939.88
8125	acidic nuclear phosphoprotein 32 family member A	ANP32A	-0.0154	0.785	0.869401	0.0565	-0.273307	1933.76
80035	ANP32A intronic transcript 1	ANP32A-IT1	0.417	0.00705	0.0645794	0.1549	2.69439	53.42
723972	acidic nuclear phosphoprotein 32 family member A pseudogene 1	ANP32AP1	-0.0045	0.976	0.985824	0.1474	-0.0305251	18.64
10541	acidic nuclear phosphoprotein 32 family member B	ANP32B	0.573	0.00354	0.0458736	0.1966	2.91657	1653.54
23520	acidic nuclear phosphoprotein 32 family member C	ANP32C	0.258	0.124	0.280026	0.1681	1.53651	13.41
81611	acidic nuclear phosphoprotein 32 family member E	ANP32E	0.109	0.177	0.345999	0.0809	1.34914	2017.45
290	alanyl aminopeptidase, membrane	ANPEP	0.25	0.222	0.397983	0.2043	1.22225	199.11
65990	adenine nucleotide translocase lysine methyltransferase	ANTKMT	-0.0268	0.858	0.914722	0.15	-0.178438	620.36
84168	ANTXR cell adhesion molecule 1	ANTXR1	0.124	0.393	0.570657	0.1455	0.853457	1357.89
118429	ANTXR cell adhesion molecule 2	ANTXR2	0.176	0.0514	0.170235	0.0904	1.94825	148.37
301	annexin A1	ANXA1	0.359	0.0472	0.162688	0.1811	1.98416	236.69
311	annexin A11	ANXA11	-0.076	0.31	0.491353	0.0748	-1.01548	7212.58
302	annexin A2	ANXA2	0.742	0.00279	0.0409459	0.2481	2.99027	498.67
303	annexin A2 pseudogene 1	ANXA2P1	0.133	0.376	0.55509	0.1501	0.88611	39.55
304	annexin A2 pseudogene 2	ANXA2P2	0.713	0.00464	0.0529793	0.2518	2.83074	67.11
389289	annexin A2 receptor	ANXA2R	0.312	0.109	0.258292	0.1945	1.60413	10.9
153684	ANXA2R antisense RNA 1	ANXA2R-AS1	0.247	0.13	0.287746	0.163	1.51409	53.37
648987	ANXA2R overlapping transcript	ANXA2R-OT1	0.303	0.00268	0.0400519	0.101	3.00212	66.02
306	annexin A3	ANXA3	0.682	0.000572	0.0181147	0.1979	3.44453	164.56
307	annexin A4	ANXA4	0.164	0.106	0.254218	0.1012	1.61807	721.28
308	annexin A5	ANXA5	0.259	0.032	0.134789	0.1209	2.14473	1614.34
309	annexin A6	ANXA6	-0.333	0.0137	0.0896324	0.135	-2.4651	10581.1
310	annexin A7	ANXA7	-0.0899	0.178	0.347239	0.0668	-1.34572	2485.38
653145	annexin A8	ANXA8	-0.174	0.299	0.479971	0.1676	-1.03912	18.32
728113	annexin A8 like 1	ANXA8L1	-0.203	0.367	0.54669	0.2256	-0.90212	11.73
8416	annexin A9	ANXA9	0.162	0.253	0.432058	0.1421	1.1423	322.69
313	acyloxyacyl hydrolase	AOAH	-0.0716	0.452	0.624283	0.0952	-0.751855	196.58
314	amine oxidase copper containing 2	AOC2	0.315	0.0224	0.11286	0.1379	2.28427	147.93
8639	amine oxidase copper containing 3	AOC3	-0.00292	0.99	0.994099	0.2342	-0.0124734	275.92
90586	amine oxidase copper containing 4, pseudogene	AOC4P	0.0368	0.881	0.928822	0.2458	0.149585	15.42
84909	aminopeptidase O (putative)	AOPEP	0.121	0.182	0.351758	0.0904	1.33528	1460.94
316	aldehyde oxidase 1	AOX1	-0.0633	0.598	0.74002	0.12	-0.527647	63.5
107161151	AOX3P-AOX2P readthrough, transcribed pseudogene	AOX3P-AOX2P	0.233	0.426	0.601631	0.2935	0.795318	11.99
55435	adaptor related protein complex 1 associated regulatory protein	AP1AR	-0.201	0.0317	0.134239	0.0934	-2.14814	1025.01
162	adaptor related protein complex 1 subunit beta 1	AP1B1	-0.169	0.1	0.246453	0.103	-1.64485	10375.1
164	adaptor related protein complex 1 subunit gamma 1	AP1G1	-0.286	0.0132	0.0879914	0.1154	-2.47854	3337.36
8906	adaptor related protein complex 1 subunit gamma 2	AP1G2	0.286	0.0601	0.185748	0.1521	1.8802	2738.81
102724814	AP1G2 antisense RNA 1	AP1G2-AS1	0.336	0.0303	0.131071	0.1552	2.16679	1322.58
8907	adaptor related protein complex 1 subunit mu 1	AP1M1	-0.115	0.0918	0.235231	0.068	-1.68609	5138.54
1174	adaptor related protein complex 1 subunit sigma 1	AP1S1	-0.127	0.289	0.469695	0.1193	-1.06126	2390.35
8905	adaptor related protein complex 1 subunit sigma 2	AP1S2	-0.227	0.00295	0.0424203	0.0765	-2.97308	835.86
130340	adaptor related protein complex 1 subunit sigma 3	AP1S3	0.141	0.0783	0.215441	0.0799	1.76035	150.83
160	adaptor related protein complex 2 subunit alpha 1	AP2A1	-0.212	0.094	0.23804	0.1268	-1.67486	15280
161	adaptor related protein complex 2 subunit alpha 2	AP2A2	-0.201	0.0452	0.159619	0.1002	-2.00262	10455.5
163	adaptor related protein complex 2 subunit beta 1	AP2B1	-0.238	0.0493	0.166668	0.1213	-1.96625	19745.5
1173	adaptor related protein complex 2 subunit mu 1	AP2M1	-0.212	0.0519	0.171303	0.109	-1.94382	27870.7
1175	adaptor related protein complex 2 subunit sigma 1	AP2S1	-0.109	0.244	0.422509	0.0933	-1.16517	1716.9
8546	adaptor related protein complex 3 subunit beta 1	AP3B1	0.131	0.209	0.383203	0.1042	1.25602	945.79
8120	adaptor related protein complex 3 subunit beta 2	AP3B2	-0.198	0.0674	0.197794	0.1084	-1.8288	9405
8943	adaptor related protein complex 3 subunit delta 1	AP3D1	-0.104	0.117	0.269809	0.0665	-1.56668	13598.5
26985	adaptor related protein complex 3 subunit mu 1	AP3M1	-0.145	0.088	0.230218	0.0847	-1.70614	981.11
10947	adaptor related protein complex 3 subunit mu 2	AP3M2	-0.311	0.0151	0.0942334	0.1281	-2.42894	3021.74
1176	adaptor related protein complex 3 subunit sigma 1	AP3S1	-0.0162	0.774	0.862034	0.0566	-0.287049	2485.85
10239	adaptor related protein complex 3 subunit sigma 2	AP3S2	-0.0839	0.245	0.423612	0.0722	-1.16273	1559.58
10717	adaptor related protein complex 4 subunit beta 1	AP4B1	-0.0958	0.156	0.320704	0.0676	-1.41795	571.02
100287722	AP4B1 antisense RNA 1	AP4B1-AS1	-0.164	0.032	0.134934	0.0766	-2.14393	132.15
23431	adaptor related protein complex 4 subunit epsilon 1	AP4E1	-0.121	0.123	0.27751	0.0783	-1.54397	375.36
9179	adaptor related protein complex 4 subunit mu 1	AP4M1	0.044	0.55	0.703772	0.0735	0.597759	1484.89
11154	adaptor related protein complex 4 subunit sigma 1	AP4S1	-0.134	0.00804	0.0692268	0.0504	-2.65056	1019.9
91056	adaptor related protein complex 5 subunit beta 1	AP5B1	-0.0422	0.656	0.782095	0.0947	-0.446105	2433.98
55745	adaptor related protein complex 5 subunit mu 1	AP5M1	-0.228	0.0252	0.120054	0.1018	-2.23813	2379.09
55317	adaptor related protein complex 5 subunit sigma 1	AP5S1	-0.125	0.0177	0.100971	0.0526	-2.37264	854.45
9907	adaptor related protein complex 5 subunit zeta 1	AP5Z1	-0.0509	0.613	0.750264	0.1006	-0.506187	1903.39
317	apoptotic peptidase activating factor 1	APAF1	-0.112	0.103	0.249687	0.0689	-1.63282	751.01
320	amyloid beta precursor protein binding family A member 1	APBA1	-0.109	0.32	0.500979	0.1098	-0.994398	14151.9
321	amyloid beta precursor protein binding family A member 2	APBA2	-0.224	0.0277	0.125296	0.1015	-2.20177	10882.4
9546	amyloid beta precursor protein binding family A member 3	APBA3	-0.00556	0.958	0.97555	0.1046	-0.0531343	513.83
322	amyloid beta precursor protein binding family B member 1	APBB1	-0.298	0.0117	0.0835024	0.1182	-2.52064	23050.3
54518	amyloid beta precursor protein binding family B member 1 interacting protein	APBB1IP	-0.397	0.0562	0.178697	0.2081	-1.90949	128.77
323	amyloid beta precursor protein binding family B member 2	APBB2	-0.147	0.132	0.290982	0.0976	-1.5044	1862.78
10307	amyloid beta precursor protein binding family B member 3	APBB3	-0.0601	0.444	0.616784	0.0785	-0.765689	2153.91
324	APC regulator of WNT signaling pathway	APC	-0.12	0.418	0.594196	0.1485	-0.809789	20051.3
10297	APC regulator of WNT signaling pathway 2	APC2	-0.145	0.338	0.518319	0.1518	-0.958044	31634.5
147495	APC down-regulated 1	APCDD1	0.161	0.239	0.417246	0.1364	1.1785	2232.11
164284	APC down-regulated 1 like	APCDD1L	0.65	0.006	0.0597205	0.2367	2.74756	12.71
327	acylaminoacyl-peptide hydrolase	APEH	-0.239	0.0191	0.104558	0.1022	-2.34301	3426.75
328	apurinic/apyrimidinic endodeoxyribonuclease 1	APEX1	-0.145	0.0586	0.183195	0.0765	-1.89106	2067.5
27301	apurinic/apyrimidinic endodeoxyribonuclease 2	APEX2	-0.0481	0.425	0.600297	0.0603	-0.797619	442.98
51107	aph-1 homolog A, gamma-secretase subunit	APH1A	0.048	0.435	0.609248	0.0615	0.779894	1265.08
83464	aph-1 homolog B, gamma-secretase subunit	APH1B	-0.0874	0.379	0.558149	0.0994	-0.879112	654.04
8539	apoptosis inhibitor 5	API5	-0.224	0.0128	0.0865696	0.0901	-2.48931	3288.81
51074	APAF1 interacting protein	APIP	0.121	0.159	0.324409	0.0859	1.4075	240.93
200558	aprataxin and PNKP like factor	APLF	0.243	0.0412	0.152628	0.1189	2.04178	57.24
8862	apelin	APLN	0.306	0.0155	0.0954132	0.1265	2.42046	979.87
187	apelin receptor	APLNR	-0.0367	0.871	0.921857	0.2253	-0.162693	1430.17
333	amyloid beta precursor like protein 1	APLP1	-0.251	0.0426	0.155138	0.1238	-2.02738	55359.5
334	amyloid beta precursor like protein 2	APLP2	-0.232	0.0125	0.0856887	0.0927	-2.49844	25910.8
57136	adipocyte plasma membrane associated protein	APMAP	-0.217	0.0155	0.0954132	0.0898	-2.42052	3800.86
104326055	APOA1 antisense RNA	APOA1-AS	-0.049	0.829	0.895337	0.2266	-0.216154	15.31
338	apolipoprotein B	APOB	0.0963	0.521	0.681443	0.1498	0.642479	41.81
10930	apolipoprotein B mRNA editing enzyme catalytic subunit 2	APOBEC2	0.388	0.0167	0.098055	0.1622	2.39352	30.48
27350	apolipoprotein B mRNA editing enzyme catalytic subunit 3C	APOBEC3C	0.0571	0.667	0.790006	0.1326	0.430791	71.06
140564	apolipoprotein B mRNA editing enzyme catalytic subunit 3D	APOBEC3D	0.227	0.351	0.53225	0.2437	0.931781	19.87
200316	apolipoprotein B mRNA editing enzyme catalytic subunit 3F	APOBEC3F	0.302	0.0283	0.127028	0.1378	2.19275	62.77
60489	apolipoprotein B mRNA editing enzyme catalytic subunit 3G	APOBEC3G	0.322	0.0225	0.113063	0.1409	2.28259	45.05
164668	apolipoprotein B mRNA editing enzyme catalytic subunit 3H	APOBEC3H	0.417	0.0428	0.155354	0.2056	2.0261	11.18
55911	apolipoprotein B receptor	APOBR	-0.0119	0.94	0.965355	0.1582	-0.0751956	65.33
341	apolipoprotein C1	APOC1	-0.0967	0.59	0.734324	0.1795	-0.538857	52.14
344	apolipoprotein C2	APOC2	-0.152	0.544	0.699879	0.2507	-0.606487	25.55
100533990	APOC4-APOC2 readthrough (NMD candidate)	APOC4-APOC2	-0.108	0.647	0.775604	0.2349	-0.458444	29.12
347	apolipoprotein D	APOD	0.035	0.796	0.875796	0.1352	0.258946	3909.84
348	apolipoprotein E	APOE	0.339	0.0919	0.235288	0.2014	1.68545	8471.9
8542	apolipoprotein L1	APOL1	0.642	0.00413	0.0498597	0.224	2.86787	189.2
23780	apolipoprotein L2	APOL2	-0.0652	0.503	0.667119	0.0973	-0.669575	1753.6
80833	apolipoprotein L3	APOL3	0.281	0.0586	0.183131	0.1484	1.89129	283.09
80832	apolipoprotein L4	APOL4	2.82	6.99e-10	1.61e-05	0.4571	6.16636	53.6
80830	apolipoprotein L6	APOL6	0.565	0.00413	0.0498364	0.1969	2.86835	587.83
81575	apolipoprotein L domain containing 1	APOLD1	0.949	0.00452	0.0523881	0.3341	2.83948	2134.77
55937	apolipoprotein M	APOM	-0.0815	0.321	0.50174	0.0821	-0.99295	72.34
79135	apolipoprotein O	APOO	-0.00919	0.899	0.940373	0.0727	-0.126313	499.06
139322	apolipoprotein O like	APOOL	-0.177	0.0966	0.241802	0.1063	-1.66162	1424.43
644649	apolipoprotein O pseudogene 5	APOOP5	-0.00574	0.971	0.982987	0.1586	-0.0362075	11.94
351	amyloid beta precursor protein	APP	-0.266	0.0158	0.0959725	0.1101	-2.41331	82004.9
100506123	atherosclerotic plaque pathogenesis associated transcript	APPAT	0.793	6.67e-05	0.0071659	0.199	3.9879	274.54
10513	amyloid beta precursor protein binding protein 2	APPBP2	-0.264	0.0211	0.109732	0.1146	-2.30633	2418.62
26060	adaptor protein, phosphotyrosine interacting with PH domain and leucine zipper 1	APPL1	-0.167	0.0889	0.231546	0.0981	-1.70111	2739.49
55198	adaptor protein, phosphotyrosine interacting with PH domain and leucine zipper 2	APPL2	0.0961	0.372	0.550941	0.1075	0.893621	921.75
339883	APRG1 tumor suppressor candidate	APRG1	0.524	0.00469	0.0531425	0.1854	2.82752	61.08
353	adenine phosphoribosyltransferase	APRT	0.0381	0.666	0.78987	0.0884	0.431235	303.05
100505854	Alu-mediated CDKN1A/p21 transcriptional regulator	APTR	0.16	0.0485	0.16533	0.0812	1.97273	257.05
54840	aprataxin	APTX	-0.0465	0.239	0.417506	0.0395	-1.17732	744.33
358	aquaporin 1 (Colton blood group)	AQP1	0.471	0.094	0.238119	0.2813	1.67455	3499.86
282679	aquaporin 11	AQP11	-0.0368	0.649	0.777389	0.0809	-0.455045	229.22
375318	aquaporin 12A	AQP12A	0.13	0.62	0.755948	0.2623	0.496045	26.9
653437	aquaporin 12B	AQP12B	0.235	0.249	0.427609	0.2037	1.15347	139.5
360	aquaporin 3 (Gill blood group)	AQP3	-0.115	0.475	0.643566	0.1615	-0.714785	83.94
361	aquaporin 4	AQP4	0.126	0.625	0.760234	0.2589	0.488193	10889.8
147429	AQP4 antisense RNA 1	AQP4-AS1	0.281	0.161	0.326216	0.2008	1.40175	77.61
362	aquaporin 5	AQP5	0.224	0.208	0.381473	0.1781	1.25959	46.14
363	aquaporin 6	AQP6	0.23	0.157	0.321815	0.1629	1.41421	60.28
364	aquaporin 7	AQP7	-0.276	0.3	0.480996	0.2664	-1.03696	53.51
100509620	aquaporin 7B	AQP7B	0.623	0.00402	0.0490396	0.2167	2.87669	27.02
375719	aquaporin 7 pseudogene 1	AQP7P1	0.956	0.00573	0.0588429	0.3461	2.76281	19.45
343	aquaporin 8	AQP8	0.358	0.0729	0.206526	0.1995	1.79374	12.98
366	aquaporin 9	AQP9	-0.405	0.0221	0.112247	0.177	-2.28877	65.69
9716	aquarius intron-binding spliceosomal factor	AQR	-0.0797	0.297	0.477969	0.0764	-1.04311	1411.26
367	androgen receptor	AR	0.0544	0.701	0.813906	0.1418	0.38347	201.43
369	A-Raf proto-oncogene, serine/threonine kinase	ARAF	0.0896	0.211	0.38588	0.0717	1.24958	800.55
116985	ArfGAP with RhoGAP domain, ankyrin repeat and PH domain 1	ARAP1	-0.0305	0.709	0.820026	0.0819	-0.372822	3457.31
100506020	ARAP1 antisense RNA 2	ARAP1-AS2	-0.124	0.2	0.371628	0.0968	-1.28139	121.82
116984	ArfGAP with RhoGAP domain, ankyrin repeat and PH domain 2	ARAP2	-0.0743	0.491	0.656517	0.1078	-0.68876	2407.43
64411	ArfGAP with RhoGAP domain, ankyrin repeat and PH domain 3	ARAP3	0.292	0.0325	0.135667	0.1367	2.13856	843.56
23237	activity regulated cytoskeleton associated protein	ARC	-0.449	0.0387	0.148135	0.2173	-2.06735	2714.02
372	archain 1	ARCN1	-0.239	0.00765	0.0677187	0.0894	-2.66694	3166.1
9870	apoptosis resistant E3 ubiquitin protein ligase 1	AREL1	-0.247	0.0288	0.128255	0.1131	-2.18624	2695.02
375	ADP ribosylation factor 1	ARF1	-0.0146	0.806	0.882355	0.0594	-0.245633	13399.8
377	ADP ribosylation factor 3	ARF3	-0.21	0.0577	0.181509	0.1107	-1.89816	36697.7
378	ADP ribosylation factor 4	ARF4	-0.123	0.0417	0.153624	0.0602	-2.03659	1648.8
106144532	ARF4 antisense RNA 1	ARF4-AS1	0.497	0.0233	0.115258	0.2189	2.26858	11.67
381	ADP ribosylation factor 5	ARF5	-0.0262	0.756	0.849813	0.0842	-0.311248	2576.5
382	ADP ribosylation factor 6	ARF6	-0.116	0.0212	0.109978	0.0505	-2.30489	1151.84
55738	ADP ribosylation factor GTPase activating protein 1	ARFGAP1	-0.114	0.241	0.419635	0.0972	-1.17173	6866.63
84364	ADP ribosylation factor GTPase activating protein 2	ARFGAP2	-0.148	0.0401	0.150761	0.0719	-2.05321	4528.89
26286	ADP ribosylation factor GTPase activating protein 3	ARFGAP3	-0.0165	0.774	0.862222	0.0576	-0.286535	767.59
10565	ADP ribosylation factor guanine nucleotide exchange factor 1	ARFGEF1	-0.222	0.0369	0.144852	0.1062	-2.08723	1979.23
102724708	ARFGEF1 divergent transcript	ARFGEF1-DT	0.193	0.113	0.26456	0.122	1.58348	30.3
10564	ADP ribosylation factor guanine nucleotide exchange factor 2	ARFGEF2	-0.26	0.0434	0.15643	0.1285	-2.0198	3651.04
57221	ARFGEF family member 3	ARFGEF3	-0.204	0.0903	0.233693	0.1205	-1.69376	12183.6
27236	ADP ribosylation factor interacting protein 1	ARFIP1	-0.0578	0.387	0.56451	0.0668	-0.865654	432.73
23647	ADP ribosylation factor interacting protein 2	ARFIP2	-0.1	0.142	0.303557	0.0682	-1.46809	1924.27
10139	ADP ribosylation factor related protein 1	ARFRP1	-0.0434	0.594	0.737118	0.0815	-0.532876	1512.23
383	arginase 1	ARG1	-0.129	0.457	0.628337	0.1734	-0.744091	11.74
384	arginase 2	ARG2	-0.11	0.182	0.352272	0.0825	-1.334	937.37
503582	arginine-fifty homeobox	ARGFX	0.818	0.00315	0.0436209	0.2772	2.95269	11.36
503640	arginine-fifty homeobox pseudogene 2	ARGFXP2	0.611	0.000534	0.0176563	0.1765	3.46334	32.7
55082	arginine and glutamate rich 1	ARGLU1	0.0883	0.308	0.489609	0.0867	1.01889	2758.51
392	Rho GTPase activating protein 1	ARHGAP1	-0.055	0.378	0.557052	0.0624	-0.881878	4020.37
79658	Rho GTPase activating protein 10	ARHGAP10	0.151	0.302	0.483174	0.1467	1.03237	307.07
9824	Rho GTPase activating protein 11A	ARHGAP11A	0.264	0.0215	0.110732	0.1149	2.29992	92.86
101928042	ARHGAP11A divergent transcript	ARHGAP11A-DT	-0.0466	0.676	0.795929	0.1116	-0.417325	25.58
114118903	ARHGAP11A-SCG5 readthrough	ARHGAP11A-SCG5	-0.19	0.0718	0.20485	0.1053	-1.80055	2177.28
89839	Rho GTPase activating protein 11B	ARHGAP11B	0.315	0.0771	0.213406	0.1781	1.76805	24.16
102725021	ARHGAP11B divergent transcript	ARHGAP11B-DT	0.256	0.0307	0.131839	0.1184	2.16144	81.4
94134	Rho GTPase activating protein 12	ARHGAP12	-0.193	0.0307	0.131931	0.0895	-2.16071	1292.22
55843	Rho GTPase activating protein 15	ARHGAP15	-0.0477	0.791	0.873024	0.1799	-0.265066	20.32
105373654	ARHGAP15 antisense RNA 1	ARHGAP15-AS1	0.0592	0.765	0.856045	0.1978	0.29942	15.06
55114	Rho GTPase activating protein 17	ARHGAP17	0.184	0.0514	0.170235	0.0942	1.94812	601.29
93663	Rho GTPase activating protein 18	ARHGAP18	0.142	0.225	0.401738	0.117	1.21431	141.14
84986	Rho GTPase activating protein 19	ARHGAP19	0.217	0.0672	0.197507	0.1184	1.83009	273.49
100533184	ARHGAP19-SLIT1 readthrough (NMD candidate)	ARHGAP19-SLIT1	-0.352	0.0452	0.159572	0.1758	-2.00291	239.31
57569	Rho GTPase activating protein 20	ARHGAP20	-0.434	0.0209	0.109208	0.1879	-2.30962	1475.11
57584	Rho GTPase activating protein 21	ARHGAP21	-0.0131	0.864	0.918374	0.0765	-0.17103	12808.8
58504	Rho GTPase activating protein 22	ARHGAP22	-0.0353	0.78	0.866444	0.1263	-0.279183	1231.49
57636	Rho GTPase activating protein 23	ARHGAP23	-0.137	0.288	0.468449	0.129	-1.0634	14561.6
83478	Rho GTPase activating protein 24	ARHGAP24	-0.0766	0.38	0.558557	0.0872	-0.878019	938.28
9938	Rho GTPase activating protein 25	ARHGAP25	-0.172	0.233	0.410619	0.1437	-1.19394	287.69
23092	Rho GTPase activating protein 26	ARHGAP26	-0.287	0.0138	0.0898646	0.1167	-2.46362	6608.1
201176	Rho GTPase activating protein 27	ARHGAP27	0.0345	0.767	0.857207	0.1166	0.29637	656.93
146880	Rho GTPase activating protein 27 pseudogene 1	ARHGAP27P1	-0.0151	0.92	0.952614	0.1496	-0.100738	494.48
109286553	ARHGAP27P1-BPTFP1-KPNA2P3 readthrough, transcribed pseudogene	ARHGAP27P1-BPTFP1-KPNA2P3	0.22	0.0202	0.107535	0.0947	2.32187	804.2
440461	Rho GTPase activating protein 27 pseudogene 2	ARHGAP27P2	0.285	0.19	0.360973	0.2171	1.31106	11.4
79822	Rho GTPase activating protein 28	ARHGAP28	0.0632	0.586	0.731634	0.1161	0.544346	77.1
9411	Rho GTPase activating protein 29	ARHGAP29	0.318	0.0206	0.108157	0.1373	2.31595	1072.59
257106	Rho GTPase activating protein 30	ARHGAP30	-0.154	0.198	0.369511	0.1193	-1.28776	146.51
57514	Rho GTPase activating protein 31	ARHGAP31	0.191	0.148	0.310599	0.1321	1.44778	1270.46
9743	Rho GTPase activating protein 32	ARHGAP32	-0.101	0.41	0.58712	0.1228	-0.823202	12102
115703	Rho GTPase activating protein 33	ARHGAP33	-0.00478	0.976	0.985824	0.1569	-0.0304733	8885.71
2909	Rho GTPase activating protein 35	ARHGAP35	-0.163	0.0674	0.197794	0.0889	-1.82892	18407.7
158763	Rho GTPase activating protein 36	ARHGAP36	-0.202	0.213	0.387192	0.1622	-1.24651	126.55
80728	Rho GTPase activating protein 39	ARHGAP39	-0.126	0.336	0.516658	0.1306	-0.961622	3739.82
393	Rho GTPase activating protein 4	ARHGAP4	-0.13	0.319	0.500121	0.1309	-0.996543	679.27
143872	Rho GTPase activating protein 42	ARHGAP42	0.173	0.11	0.259765	0.1083	1.59862	334.85
100128386	ARHGAP42 antisense RNA 1	ARHGAP42-AS1	-0.072	0.691	0.806593	0.1814	-0.397111	9.32
9912	Rho GTPase activating protein 44	ARHGAP44	-0.213	0.081	0.219799	0.1222	-1.74484	5503.47
100128006	ARHGAP44 and MYOCD antisense RNA 1	ARHGAP44-AS1	-0.11	0.474	0.642981	0.1541	-0.715766	18.01
23526	Rho GTPase activating protein 45	ARHGAP45	-0.0189	0.866	0.919635	0.1121	-0.16876	1693.46
394	Rho GTPase activating protein 5	ARHGAP5	0.185	0.167	0.334095	0.1337	1.38112	10473.2
84837	ARHGAP5 antisense RNA 1 (head to head)	ARHGAP5-AS1	0.114	0.244	0.422504	0.0977	1.16522	59.18
395	Rho GTPase activating protein 6	ARHGAP6	0.046	0.724	0.830125	0.1304	0.35249	444.28
23779	Rho GTPase activating protein 8	ARHGAP8	0.307	0.0478	0.163691	0.1553	1.97917	28.08
64333	Rho GTPase activating protein 9	ARHGAP9	-0.218	0.105	0.253983	0.1344	-1.61893	189.51
396	Rho GDP dissociation inhibitor alpha	ARHGDIA	0.0104	0.919	0.952238	0.1019	0.101717	13279.1
397	Rho GDP dissociation inhibitor beta	ARHGDIB	-0.106	0.382	0.560861	0.1211	-0.873734	237
398	Rho GDP dissociation inhibitor gamma	ARHGDIG	-0.081	0.57	0.719459	0.1426	-0.568005	7134.41
9138	Rho guanine nucleotide exchange factor 1	ARHGEF1	-0.0406	0.762	0.854248	0.134	-0.303274	2147.79
9639	Rho guanine nucleotide exchange factor 10	ARHGEF10	0.194	0.0704	0.20256	0.1072	1.8095	1778.4
55160	Rho guanine nucleotide exchange factor 10 like	ARHGEF10L	-0.0605	0.576	0.723931	0.1082	-0.559735	3623.4
9826	Rho guanine nucleotide exchange factor 11	ARHGEF11	-0.203	0.0372	0.145364	0.0972	-2.08379	7356.26
23365	Rho guanine nucleotide exchange factor 12	ARHGEF12	-0.169	0.0984	0.24433	0.102	-1.65285	8855.05
22899	Rho guanine nucleotide exchange factor 15	ARHGEF15	0.309	0.0623	0.1895	0.1656	1.86418	306.01
27237	Rho guanine nucleotide exchange factor 16	ARHGEF16	0.298	0.0498	0.167299	0.1519	1.96135	152.38
9828	Rho guanine nucleotide exchange factor 17	ARHGEF17	-0.181	0.114	0.264901	0.1146	-1.58233	10613.6
100287837	ARHGEF17 antisense RNA 1	ARHGEF17-AS1	0.0374	0.823	0.892398	0.1668	0.224102	30.7
23370	Rho/Rac guanine nucleotide exchange factor 18	ARHGEF18	-0.1	0.162	0.327583	0.0716	-1.39769	2842.42
128272	Rho guanine nucleotide exchange factor 19	ARHGEF19	0.45	0.016	0.0965209	0.1867	2.40816	67.43
9181	Rho/Rac guanine nucleotide exchange factor 2	ARHGEF2	-0.182	0.0103	0.07865	0.071	-2.56431	6352.96
115557	Rho guanine nucleotide exchange factor 25	ARHGEF25	-0.13	0.247	0.425567	0.112	-1.15848	6397.82
26084	Rho guanine nucleotide exchange factor 26	ARHGEF26	0.409	0.0254	0.120501	0.1831	2.23483	795.83
100507524	ARHGEF26 antisense RNA 1	ARHGEF26-AS1	0.316	0.0349	0.140544	0.15	2.11005	470.79
64283	Rho guanine nucleotide exchange factor 28	ARHGEF28	-0.0859	0.419	0.595373	0.1064	-0.807366	739.32
107985209	ARHGEF2 antisense RNA 2	ARHGEF2-AS2	0.139	0.489	0.655069	0.2005	0.692302	25.4
50650	Rho guanine nucleotide exchange factor 3	ARHGEF3	-0.253	0.046	0.160583	0.127	-1.99568	2617.74
100271715	Rho guanine nucleotide exchange factor 33	ARHGEF33	-0.0817	0.297	0.478031	0.0784	-1.04295	149.67
728377	Rho guanine nucleotide exchange factor 34, pseudogene	ARHGEF34P	0.431	0.0123	0.0851151	0.1723	2.50389	52.59
445328	Rho guanine nucleotide exchange factor 35	ARHGEF35	0.546	0.0107	0.0800243	0.214	2.55338	13.51
101928605	ARHGEF35 antisense RNA 1	ARHGEF35-AS1	0.63	0.000926	0.0235216	0.1901	3.31219	12.43
389337	Rho guanine nucleotide exchange factor 37	ARHGEF37	0.147	0.365	0.544521	0.1622	0.906294	2219.36
54848	Rho guanine nucleotide exchange factor 38	ARHGEF38	0.0603	0.74	0.840007	0.1817	0.331948	17.86
84904	Rho guanine nucleotide exchange factor 39	ARHGEF39	0.17	0.0576	0.18141	0.0894	1.89877	158.08
50649	Rho guanine nucleotide exchange factor 4	ARHGEF4	-0.158	0.155	0.319641	0.1112	-1.42087	24794.4
55701	Rho guanine nucleotide exchange factor 40	ARHGEF40	0.133	0.203	0.374984	0.1046	1.27403	1775.74
7984	Rho guanine nucleotide exchange factor 5	ARHGEF5	0.452	0.012	0.0842903	0.1799	2.51266	63.33
9459	Rac/Cdc42 guanine nucleotide exchange factor 6	ARHGEF6	0.0279	0.771	0.860106	0.096	0.29102	1215.68
8874	Rho guanine nucleotide exchange factor 7	ARHGEF7	-0.195	0.0422	0.154343	0.096	-2.03203	7527.14
100874238	ARHGEF7 antisense RNA 2	ARHGEF7-AS2	-0.33	0.00521	0.0559782	0.1183	-2.794	64.28
23229	Cdc42 guanine nucleotide exchange factor 9	ARHGEF9	-0.256	0.0417	0.153737	0.1258	-2.0361	12353.2
8289	AT-rich interaction domain 1A	ARID1A	-0.062	0.421	0.597232	0.0771	-0.803875	8193.75
57492	AT-rich interaction domain 1B	ARID1B	-0.215	0.0336	0.137995	0.1013	-2.12538	4436.37
196528	AT-rich interaction domain 2	ARID2	-0.0139	0.873	0.923322	0.0868	-0.160274	778.69
1820	AT-rich interaction domain 3A	ARID3A	0.314	0.00468	0.0531272	0.1111	2.82839	357.32
10620	AT-rich interaction domain 3B	ARID3B	0.177	0.0596	0.185208	0.0939	1.88369	203.51
138715	AT-rich interaction domain 3C	ARID3C	0.0309	0.825	0.893521	0.1399	0.22119	55.69
5926	AT-rich interaction domain 4A	ARID4A	0.14	0.0579	0.181873	0.074	1.89633	2839.03
51742	AT-rich interaction domain 4B	ARID4B	0.202	0.041	0.152359	0.0991	2.04329	4457.75
10865	AT-rich interaction domain 5A	ARID5A	0.613	0.0111	0.0818412	0.2415	2.53834	1127.78
84159	AT-rich interaction domain 5B	ARID5B	0.0332	0.728	0.832331	0.0956	0.347179	3176.22
25820	ariadne RBR E3 ubiquitin protein ligase 1	ARIH1	-0.187	0.023	0.114507	0.0823	-2.27319	3950.97
10425	ariadne RBR E3 ubiquitin protein ligase 2	ARIH2	-0.129	0.0271	0.124374	0.0585	-2.21023	3301.87
646450	ARIH2 opposite strand lncRNA	ARIH2OS	0.0305	0.678	0.797071	0.0735	0.415167	67.58
400	ADP ribosylation factor like GTPase 1	ARL1	-0.217	0.0306	0.131744	0.1005	-2.16259	2788.71
285598	ADP ribosylation factor like GTPase 10	ARL10	-0.0504	0.562	0.712773	0.0868	-0.580433	2661.93
392509	ADP ribosylation factor like GTPase 13A	ARL13A	0.163	0.2	0.371349	0.1271	1.28231	20.9
200894	ADP ribosylation factor like GTPase 13B	ARL13B	0.226	0.0484	0.165122	0.1145	1.97383	330.68
120534	ADP ribosylation factor like GTPase 14 effector protein	ARL14EP	-0.0988	0.193	0.364144	0.0759	-1.302	929.79
54622	ADP ribosylation factor like GTPase 15	ARL15	-0.0675	0.517	0.677818	0.1042	-0.648198	775.89
339231	ADP ribosylation factor like GTPase 16	ARL16	-0.0373	0.589	0.733363	0.069	-0.540774	631.65
51326	ADP ribosylation factor like GTPase 17A	ARL17A	0.421	0.0081	0.0694748	0.1589	2.64782	1075.74
100506084	ADP ribosylation factor like GTPase 17B	ARL17B	0.455	0.0242	0.117917	0.202	2.25322	448.53
402	ADP ribosylation factor like GTPase 2	ARL2	0.0406	0.702	0.814226	0.106	0.382868	1496.6
23568	ADP ribosylation factor like GTPase 2 binding protein	ARL2BP	-0.121	0.0182	0.102538	0.0511	-2.36162	2363.42
100528018	ARL2-SNX15 readthrough (NMD candidate)	ARL2-SNX15	-0.0458	0.582	0.729051	0.0832	-0.550198	1264.12
403	ADP ribosylation factor like GTPase 3	ARL3	-0.0849	0.172	0.339562	0.0621	-1.36717	2572.52
10124	ADP ribosylation factor like GTPase 4A	ARL4A	-0.0512	0.65	0.777814	0.1128	-0.454282	631.52
10123	ADP ribosylation factor like GTPase 4C	ARL4C	-0.184	0.0419	0.153852	0.0906	-2.03495	3988.65
379	ADP ribosylation factor like GTPase 4D	ARL4D	-0.0989	0.575	0.723553	0.1764	-0.560682	625.45
26225	ADP ribosylation factor like GTPase 5A	ARL5A	-0.0767	0.341	0.521246	0.0806	-0.952178	1706.95
221079	ADP ribosylation factor like GTPase 5B	ARL5B	-0.036	0.792	0.873786	0.137	-0.263104	836.47
390790	ADP ribosylation factor like GTPase 5C	ARL5C	0.306	0.118	0.270613	0.1956	1.56454	19
84100	ADP ribosylation factor like GTPase 6	ARL6	-0.238	0.0719	0.205042	0.1321	-1.79968	849.31
23204	ADP ribosylation factor like GTPase 6 interacting protein 1	ARL6IP1	-0.212	0.0278	0.125516	0.0966	-2.20039	15456.9
51329	ADP ribosylation factor like GTPase 6 interacting protein 4	ARL6IP4	-0.0161	0.883	0.929748	0.1093	-0.147653	2419.36
10550	ADP ribosylation factor like GTPase 6 interacting protein 5	ARL6IP5	-0.138	0.088	0.230218	0.0807	-1.70621	3408.46
151188	ADP ribosylation factor like GTPase 6 interacting protein 6	ARL6IP6	0.105	0.311	0.492487	0.1034	1.01277	287.44
127829	ADP ribosylation factor like GTPase 8A	ARL8A	-0.0691	0.395	0.572535	0.0813	-0.850161	5059.42
55207	ADP ribosylation factor like GTPase 8B	ARL8B	-0.275	0.0123	0.0851412	0.1098	-2.50311	6826.01
132946	ADP ribosylation factor like GTPase 9	ARL9	0.0367	0.724	0.829993	0.1039	0.352805	49.45
100996425	androgen receptor regulated long noncoding RNA 1	ARLNC1	0.219	0.161	0.326446	0.1562	1.40118	14.23
55156	armadillo repeat containing 1	ARMC1	-0.0743	0.27	0.450316	0.0674	-1.10252	1649.9
83787	armadillo repeat containing 10	ARMC10	-0.171	0.017	0.0987941	0.0715	-2.38776	1167.22
221481	armadillo repeat containing 12	ARMC12	0.361	0.00837	0.0706365	0.1371	2.63675	62.45
84071	armadillo repeat containing 2	ARMC2	0.209	0.0126	0.0860528	0.0838	2.49538	166.94
219681	armadillo repeat containing 3	ARMC3	0.24	0.0238	0.11678	0.1061	2.25967	48.78
79798	armadillo repeat containing 5	ARMC5	-0.225	0.0354	0.141776	0.1068	-2.10411	1865.32
93436	armadillo repeat containing 6	ARMC6	-0.135	0.101	0.247114	0.0823	-1.64197	1571.42
79637	armadillo repeat containing 7	ARMC7	-0.0738	0.292	0.472724	0.07	-1.05445	378.6
25852	armadillo repeat containing 8	ARMC8	-0.184	0.00898	0.0728799	0.0702	-2.61292	1427.15
80210	armadillo repeat containing 9	ARMC9	0.123	0.0911	0.234466	0.073	1.68981	1404.43
51309	armadillo repeat containing X-linked 1	ARMCX1	-0.0965	0.254	0.432254	0.0845	-1.14184	960.42
9823	armadillo repeat containing X-linked 2	ARMCX2	-0.158	0.105	0.25351	0.0975	-1.62057	2289.17
51566	armadillo repeat containing X-linked 3	ARMCX3	-0.254	0.00223	0.0363371	0.0832	-3.0575	3793.48
100131755	armadillo repeat containing X-linked 4	ARMCX4	-0.15	0.127	0.283162	0.0981	-1.52792	2198.36
64860	armadillo repeat containing X-linked 5	ARMCX5	-0.159	0.119	0.27257	0.1019	-1.55847	354.11
100528062	ARMCX5-GPRASP2 readthrough	ARMCX5-GPRASP2	-0.313	0.00966	0.0757332	0.1209	-2.58793	3070.21
54470	armadillo repeat containing X-linked 6	ARMCX6	0.00938	0.881	0.928656	0.0626	0.149938	286.43
339541	armadillo like helical domain containing 1	ARMH1	0.559	0.000501	0.0170372	0.1605	3.48021	227.68
79591	armadillo like helical domain containing 3	ARMH3	-0.143	0.0108	0.080416	0.0562	-2.54953	1176.61
145407	armadillo like helical domain containing 4	ARMH4	-0.0994	0.473	0.641507	0.1384	-0.718329	3982.39
79624	acidic residue methyltransferase 1	ARMT1	-0.285	0.00399	0.0488154	0.0989	-2.87889	538.83
405	aryl hydrocarbon receptor nuclear translocator	ARNT	-0.0605	0.201	0.372783	0.0473	-1.27892	1080.93
9915	aryl hydrocarbon receptor nuclear translocator 2	ARNT2	-0.21	0.0551	0.176734	0.1096	-1.91846	25158.3
101929560	ARNT2 divergent transcript	ARNT2-DT	0.236	0.115	0.266888	0.1496	1.57619	17.94
10552	actin related protein 2/3 complex subunit 1A	ARPC1A	-0.127	0.0379	0.146617	0.061	-2.07592	2833.7
10095	actin related protein 2/3 complex subunit 1B	ARPC1B	0.261	0.0798	0.217699	0.1488	1.75199	403.28
10109	actin related protein 2/3 complex subunit 2	ARPC2	-0.0821	0.2	0.372199	0.0641	-1.28023	3966.39
10094	actin related protein 2/3 complex subunit 3	ARPC3	-0.0495	0.464	0.634506	0.0677	-0.731678	1191.18
10093	actin related protein 2/3 complex subunit 4	ARPC4	-0.0566	0.389	0.567162	0.0657	-0.86087	2103.96
100526693	ARPC4-TTLL3 readthrough	ARPC4-TTLL3	0.0428	0.442	0.61501	0.0557	0.769131	1213.09
10092	actin related protein 2/3 complex subunit 5	ARPC5	-0.126	0.0576	0.18141	0.0664	-1.89852	2120.81
81873	actin related protein 2/3 complex subunit 5 like	ARPC5L	-0.0923	0.233	0.410623	0.0773	-1.19377	1913.95
348110	actin related protein 2/3 complex inhibitor	ARPIN	-0.00212	0.977	0.986533	0.074	-0.0286127	1568.31
100526783	ARPIN-AP3S2 readthrough	ARPIN-AP3S2	-0.0918	0.193	0.3646	0.0706	-1.30067	1706.48
10776	cAMP regulated phosphoprotein 19	ARPP19	-0.18	0.0588	0.183522	0.0954	-1.88998	15948.1
10777	cAMP regulated phosphoprotein 21	ARPP21	0.0569	0.577	0.72464	0.1019	0.558401	5963.19
407	arrestin 3	ARR3	0.526	0.00796	0.0690055	0.1984	2.65396	13.8
408	arrestin beta 1	ARRB1	-0.0968	0.383	0.5614	0.1109	-0.872521	16722
409	arrestin beta 2	ARRB2	-0.0961	0.243	0.421264	0.0823	-1.16794	2752.32
92714	arrestin domain containing 1	ARRDC1	0.187	0.0698	0.201611	0.1029	1.81321	1777.19
85026	ARRDC1 antisense RNA 1	ARRDC1-AS1	0.105	0.25	0.429294	0.091	1.14921	459.53
27106	arrestin domain containing 2	ARRDC2	0.146	0.454	0.626369	0.195	0.747961	1934.26
57561	arrestin domain containing 3	ARRDC3	0.0765	0.593	0.736667	0.1433	0.533864	674.31
100129716	ARRDC3 antisense RNA 1	ARRDC3-AS1	-0.0423	0.819	0.890245	0.185	-0.22877	10.29
91947	arrestin domain containing 4	ARRDC4	0.208	0.0863	0.227756	0.121	1.7152	814.11
645432	arrestin domain containing 5	ARRDC5	-0.134	0.382	0.560948	0.1534	-0.873504	29.4
410	arylsulfatase A	ARSA	-0.0552	0.564	0.714801	0.0958	-0.576601	1917.39
411	arylsulfatase B	ARSB	-0.137	0.12	0.273969	0.0878	-1.55439	664.41
414	arylsulfatase D	ARSD	0.301	0.00672	0.0630183	0.1109	2.7103	406.69
100506356	ARSD antisense RNA 1	ARSD-AS1	0.302	0.0276	0.125161	0.137	2.20246	81.67
416	arylsulfatase F	ARSF	-0.0712	0.58	0.727082	0.1286	-0.553714	70.03
22901	arylsulfatase G	ARSG	0.0778	0.121	0.274609	0.0501	1.55227	562.48
340075	arylsulfatase family member I	ARSI	0.365	0.0723	0.205707	0.2031	1.79713	90.78
79642	arylsulfatase family member J	ARSJ	0.567	0.00156	0.0307806	0.1792	3.16397	140.57
153642	arylsulfatase family member K	ARSK	-0.0836	0.337	0.517636	0.0871	-0.959686	261.75
415	arylsulfatase L	ARSL	0.145	0.183	0.35308	0.1092	1.33212	80.47
419	ADP-ribosyltransferase 3 (inactive)	ART3	0.0193	0.895	0.937061	0.1464	0.132118	176.52
9048	artemin	ARTN	0.673	0.00289	0.0419394	0.2259	2.97889	33.99
64801	ARV1 homolog, fatty acid homeostasis modulator	ARV1	-0.0227	0.674	0.794688	0.0538	-0.421262	531.38
421	ARVCF delta catenin family member	ARVCF	-0.00432	0.965	0.979427	0.0974	-0.0443552	2739.36
170302	aristaless related homeobox	ARX	-0.207	0.133	0.29191	0.1376	-1.50139	856.61
57412	arsenite methyltransferase	AS3MT	0.335	0.00117	0.0268517	0.1032	3.2453	128.54
427	N-acylsphingosine amidohydrolase 1	ASAH1	-0.0851	0.287	0.467772	0.0799	-1.06533	2664.11
101929066	ASAH1 antisense RNA 1	ASAH1-AS1	-0.0311	0.728	0.83207	0.0896	-0.347585	79.28
56624	N-acylsphingosine amidohydrolase 2	ASAH2	-0.294	0.0562	0.17865	0.1541	-1.90966	201.64
653308	N-acylsphingosine amidohydrolase 2B	ASAH2B	-0.258	0.0447	0.158791	0.1286	-2.0075	334.28
50807	ArfGAP with SH3 domain, ankyrin repeat and PH domain 1	ASAP1	-0.137	0.153	0.316548	0.0957	-1.43062	4259.32
29065	ASAP1 intronic transcript 1	ASAP1-IT1	1.05	0.000497	0.0169189	0.3028	3.48247	14.01
100507117	ASAP1 intronic transcript 2	ASAP1-IT2	1.21	1.67e-07	0.001278	0.231	5.23326	72.76
8853	ArfGAP with SH3 domain, ankyrin repeat and PH domain 2	ASAP2	-0.192	0.0298	0.130129	0.0885	-2.17273	1406.8
55616	ArfGAP with SH3 domain, ankyrin repeat and PH domain 3	ASAP3	0.271	0.0114	0.0827626	0.1072	2.53027	1492.71
51665	ankyrin repeat and SOCS box containing 1	ASB1	-0.13	0.127	0.283981	0.0852	-1.52496	2583.33
79754	ankyrin repeat and SOCS box containing 13	ASB13	-0.286	0.0146	0.0926363	0.1171	-2.44166	1437.83
142686	ankyrin repeat and SOCS box containing 14	ASB14	0.139	0.13	0.288133	0.0916	1.5128	139.41
92591	ankyrin repeat and SOCS box containing 16	ASB16	0.122	0.198	0.369684	0.0948	1.28719	138.43
339201	ASB16 antisense RNA 1	ASB16-AS1	0.0914	0.294	0.475381	0.0872	1.04882	143.36
401036	ankyrin repeat and SOCS box containing 18	ASB18	0.462	0.00439	0.0514865	0.162	2.84899	21.71
51676	ankyrin repeat and SOCS box containing 2	ASB2	-0.148	0.315	0.496037	0.1474	-1.00479	601.1
51130	ankyrin repeat and SOCS box containing 3	ASB3	0.0421	0.508	0.670993	0.0636	0.662406	478.12
51666	ankyrin repeat and SOCS box containing 4	ASB4	0.371	0.0496	0.167013	0.1889	1.96342	48.25
140458	ankyrin repeat and SOCS box containing 5	ASB5	0.101	0.391	0.568363	0.1181	0.858256	38.72
140459	ankyrin repeat and SOCS box containing 6	ASB6	0.000935	0.988	0.992916	0.0602	0.0155283	2401.05
140460	ankyrin repeat and SOCS box containing 7	ASB7	-0.145	0.0643	0.192621	0.0786	-1.85002	403.59
140461	ankyrin repeat and SOCS box containing 8	ASB8	-0.122	0.0817	0.220884	0.0702	-1.74095	1789.93
728619	ankyrin repeat and SOCS box containing 9 pseudogene 1	ASB9P1	0.259	0.162	0.327412	0.1853	1.39812	16.79
51008	activating signal cointegrator 1 complex subunit 1	ASCC1	0.11	0.0873	0.229249	0.0642	1.70985	809.6
84164	activating signal cointegrator 1 complex subunit 2	ASCC2	0.216	0.0164	0.0973245	0.09	2.39972	836.78
10973	activating signal cointegrator 1 complex subunit 3	ASCC3	-0.0146	0.851	0.910444	0.0779	-0.187737	842.41
429	achaete-scute family bHLH transcription factor 1	ASCL1	0.239	0.0793	0.216823	0.1364	1.75496	374.65
430	achaete-scute family bHLH transcription factor 2	ASCL2	0.239	0.287	0.468089	0.2245	1.06441	27.58
647219	achaete-scute family bHLH transcription factor 5	ASCL5	-0.014	0.944	0.96732	0.1975	-0.0708587	22.94
110599588	ASNSD1 upstream open reading frame	ASDURF	-0.185	0.0706	0.202808	0.1024	-1.80821	119.63
25842	anti-silencing function 1A histone chaperone	ASF1A	-0.00384	0.965	0.97963	0.0874	-0.0439448	476.47
432	asialoglycoprotein receptor 1	ASGR1	0.27	0.0424	0.15491	0.1331	2.02967	140.02
433	asialoglycoprotein receptor 2	ASGR2	-0.0156	0.943	0.966929	0.2172	-0.0717793	27.57
55870	ASH1 like histone lysine methyltransferase	ASH1L	-0.118	0.234	0.412172	0.0988	-1.19037	10038.1
645676	ASH1L antisense RNA 1	ASH1L-AS1	-0.0736	0.311	0.492402	0.0726	-1.01299	89.95
9070	ASH2 like, histone lysine methyltransferase complex subunit	ASH2L	-0.235	0.014	0.0906038	0.0954	-2.45769	1943.18
41	acid sensing ion channel subunit 1	ASIC1	-0.0578	0.398	0.575479	0.0685	-0.844853	3346.51
40	acid sensing ion channel subunit 2	ASIC2	-0.162	0.188	0.358913	0.1232	-1.3169	2108.05
9311	acid sensing ion channel subunit 3	ASIC3	0.206	0.128	0.285169	0.1355	1.52096	736.26
55515	acid sensing ion channel subunit family member 4	ASIC4	0.205	0.0968	0.242079	0.1233	1.6608	531.35
105373885	ASIC4 antisense RNA 1	ASIC4-AS1	0.129	0.437	0.611052	0.1659	0.776781	12.93
51802	acid sensing ion channel subunit family member 5	ASIC5	0.318	0.0992	0.245232	0.1926	1.64888	15.67
434	agouti signaling protein	ASIP	0.464	0.00583	0.059037	0.1682	2.75736	17.49
435	argininosuccinate lyase	ASL	0.0842	0.153	0.316793	0.0589	1.4297	833.86
438	acetylserotonin O-methyltransferase	ASMT	0.00752	0.94	0.965193	0.0997	0.0754863	52.43
8623	acetylserotonin O-methyltransferase like	ASMTL	-0.181	0.0679	0.198511	0.0989	-1.82557	1708.73
80161	ASMTL antisense RNA 1	ASMTL-AS1	0.13	0.385	0.563072	0.1492	0.868791	589.33
440	asparagine synthetase (glutamine-hydrolyzing)	ASNS	-0.16	0.0288	0.128312	0.0734	-2.18554	1176.57
54529	asparagine synthetase domain containing 1	ASNSD1	-0.125	0.106	0.254896	0.0771	-1.61584	829.62
443	aspartoacylase	ASPA	0.272	0.203	0.37531	0.2137	1.27309	1734.47
554235	aspartate dehydrogenase domain containing	ASPDH	-0.0948	0.443	0.616305	0.1236	-0.76689	803.87
374569	asparaginase	ASPG	0.433	0.0276	0.125141	0.1965	2.2028	74.01
444	aspartate beta-hydroxylase	ASPH	0.0538	0.553	0.705918	0.0907	0.59323	3249.11
253982	aspartate beta-hydroxylase domain containing 1	ASPHD1	0.0921	0.5	0.664668	0.1367	0.673929	5790.41
57168	aspartate beta-hydroxylase domain containing 2	ASPHD2	-0.343	0.0189	0.104233	0.1461	-2.34756	785.14
259266	assembly factor for spindle microtubules	ASPM	0.166	0.319	0.500013	0.1665	0.996963	45.89
54829	asporin	ASPN	-0.0466	0.822	0.891939	0.207	-0.225372	32.08
151516	aspartic peptidase retroviral like 1	ASPRV1	0.148	0.104	0.252067	0.0911	1.62495	190.6
79058	ASPSCR1 tether for SLC2A4, UBX domain containing	ASPSCR1	-0.0365	0.747	0.844014	0.1129	-0.32311	1079.48
105378553	lncRNA antisense to PTPRE protein-coding gene	AS-PTPRE	0.418	0.0299	0.130407	0.1927	2.17154	14.29
80150	asparaginase and isoaspartyl peptidase 1	ASRGL1	0.201	0.0331	0.137024	0.0942	2.1309	2702.1
445	argininosuccinate synthase 1	ASS1	-0.0543	0.671	0.792874	0.1278	-0.424747	1820.5
28990	asteroid homolog 1	ASTE1	-0.0122	0.818	0.889429	0.0529	-0.230626	400.75
431705	astacin like metalloendopeptidase	ASTL	0.205	0.273	0.45364	0.1873	1.09556	57.48
460	astrotactin 1	ASTN1	-0.245	0.0897	0.232735	0.1441	-1.69697	10092.1
23245	astrotactin 2	ASTN2	-0.264	0.0154	0.0952108	0.1089	-2.42201	2635
171023	ASXL transcriptional regulator 1	ASXL1	-0.105	0.111	0.260858	0.066	-1.59467	2058.88
55252	ASXL transcriptional regulator 2	ASXL2	-0.0104	0.913	0.948843	0.0955	-0.109215	1216.2
80816	ASXL transcriptional regulator 3	ASXL3	-0.0711	0.41	0.58712	0.0864	-0.823265	678.66
84896	ATPase family AAA domain containing 1	ATAD1	-0.209	0.0316	0.134107	0.0974	-2.149	2786.16
29028	ATPase family AAA domain containing 2	ATAD2	0.12	0.131	0.288535	0.0793	1.51167	439.28
54454	ATPase family AAA domain containing 2B	ATAD2B	0.221	0.0517	0.170871	0.1133	1.94576	395.8
55210	ATPase family AAA domain containing 3A	ATAD3A	-0.0232	0.774	0.862151	0.0808	-0.286723	1143.08
83858	ATPase family AAA domain containing 3B	ATAD3B	0.182	0.17	0.33724	0.1327	1.37284	1338.3
219293	ATPase family AAA domain containing 3C	ATAD3C	0.328	0.0165	0.0975462	0.1366	2.39855	228.89
79915	ATPase family AAA domain containing 5	ATAD5	0.592	0.000311	0.0136928	0.1641	3.60583	295.88
79969	alpha tubulin acetyltransferase 1	ATAT1	-0.0184	0.719	0.826849	0.0511	-0.359323	1674.67
85300	ATCAY kinesin light chain interacting caytaxin	ATCAY	-0.137	0.144	0.305259	0.0934	-1.46215	21866
11101	arginyltransferase 1	ATE1	-0.238	0.019	0.104558	0.1017	-2.34465	1327.7
100130887	ATE1 antisense RNA 1	ATE1-AS1	0.406	0.163	0.328361	0.2909	1.39551	59.96
466	activating transcription factor 1	ATF1	0.123	0.135	0.294562	0.0821	1.49387	223.22
1386	activating transcription factor 2	ATF2	-0.227	0.023	0.114466	0.0999	-2.2737	2675.72
467	activating transcription factor 3	ATF3	-0.313	0.192	0.363749	0.2406	-1.30322	292.85
468	activating transcription factor 4	ATF4	-0.0636	0.432	0.606699	0.081	-0.785239	5010.83
22809	activating transcription factor 5	ATF5	0.137	0.132	0.290919	0.0909	1.50472	478.96
22926	activating transcription factor 6	ATF6	-0.104	0.238	0.416679	0.0878	-1.17962	1858.53
1388	activating transcription factor 6 beta	ATF6B	0.0117	0.854	0.911954	0.0636	0.184639	3036.79
102724329	ATF6 divergent transcript	ATF6-DT	0.483	0.0221	0.112247	0.2108	2.28869	11.46
11016	activating transcription factor 7	ATF7	0.0823	0.379	0.557712	0.0934	0.880613	1093.01
55729	activating transcription factor 7 interacting protein	ATF7IP	-0.072	0.372	0.551166	0.0806	-0.893043	2006.35
80063	activating transcription factor 7 interacting protein 2	ATF7IP2	0.17	0.0786	0.21583	0.0964	1.75907	199.41
114108587	ATF7-NPFF readthrough	ATF7-NPFF	-0.0239	0.809	0.883906	0.099	-0.241474	199.61
83734	autophagy related 10	ATG10	0.143	0.14	0.300417	0.097	1.47639	382.77
60673	autophagy related 101	ATG101	-0.163	0.128	0.284944	0.107	-1.52185	1039.37
9140	autophagy related 12	ATG12	-0.0416	0.466	0.63614	0.0571	-0.728772	1351.51
9776	autophagy related 13	ATG13	-0.144	0.0611	0.187368	0.0767	-1.87254	6369.67
22863	autophagy related 14	ATG14	0.0187	0.764	0.855264	0.0623	0.300839	749.17
55054	autophagy related 16 like 1	ATG16L1	-0.234	0.00561	0.0582451	0.0846	-2.76965	1029.1
89849	autophagy related 16 like 2	ATG16L2	-0.00436	0.949	0.970605	0.0678	-0.0642579	1082.23
23130	autophagy related 2A	ATG2A	-0.151	0.171	0.339249	0.1101	-1.36795	4312.76
55102	autophagy related 2B	ATG2B	-0.283	0.0208	0.10883	0.1225	-2.31204	2407.65
64422	autophagy related 3	ATG3	-0.0329	0.607	0.746203	0.064	-0.514846	1028.3
115201	autophagy related 4A cysteine peptidase	ATG4A	0.0766	0.251	0.429983	0.0667	1.14771	156.85
23192	autophagy related 4B cysteine peptidase	ATG4B	-0.018	0.809	0.88383	0.0746	-0.241666	3604.91
84938	autophagy related 4C cysteine peptidase	ATG4C	-0.138	0.191	0.361908	0.1055	-1.30821	546.07
84971	autophagy related 4D cysteine peptidase	ATG4D	-0.0719	0.446	0.618447	0.0943	-0.762471	1173.77
9474	autophagy related 5	ATG5	-0.274	0.00651	0.0620273	0.1007	-2.72116	680.63
10533	autophagy related 7	ATG7	-0.0489	0.195	0.365981	0.0377	-1.29687	1871.2
79065	autophagy related 9A	ATG9A	-0.192	0.0661	0.195677	0.1047	-1.83777	8990.29
285973	autophagy related 9B	ATG9B	0.477	0.00767	0.0677187	0.1788	2.66626	372.33
471	5-aminoimidazole-4-carboxamide ribonucleotide formyltransferase/IMP cyclohydrolase	ATIC	-0.139	0.092	0.235376	0.0825	-1.68504	1501.06
51062	atlastin GTPase 1	ATL1	-0.242	0.0359	0.142965	0.1155	-2.09826	5083.44
64225	atlastin GTPase 2	ATL2	-0.0875	0.236	0.414713	0.0738	-1.18473	1210.83
25923	atlastin GTPase 3	ATL3	0.00617	0.951	0.971664	0.1001	0.0616849	943.39
472	ATM serine/threonine kinase	ATM	-0.105	0.206	0.379812	0.0832	-1.2634	1387.93
23300	ATM interactor	ATMIN	-0.219	0.0567	0.179645	0.1151	-1.90543	3735.51
1822	atrophin 1	ATN1	0.0736	0.403	0.580305	0.088	0.836256	26868
220202	atonal bHLH transcription factor 7	ATOH7	-0.167	0.204	0.376944	0.1313	-1.26977	123.17
84913	atonal bHLH transcription factor 8	ATOH8	0.364	0.0977	0.243454	0.22	1.65619	423.9
56204	atos homolog A	ATOSA	-0.0261	0.765	0.856045	0.0871	-0.299206	735.82
80256	atos homolog B	ATOSB	0.0248	0.731	0.83399	0.0721	0.34356	1939.38
475	antioxidant 1 copper chaperone	ATOX1	-0.0294	0.776	0.863067	0.103	-0.285104	303.62
105378235	ATOX1 antisense RNA 1	ATOX1-AS1	0.463	0.0163	0.0972042	0.1927	2.4014	15.39
57194	ATPase phospholipid transporting 10A (putative)	ATP10A	0.276	0.0586	0.183249	0.1458	1.89081	1294.36
23120	ATPase phospholipid transporting 10B (putative)	ATP10B	-0.153	0.444	0.616555	0.1995	-0.766137	600.38
57205	ATPase phospholipid transporting 10D (putative)	ATP10D	0.0748	0.357	0.537522	0.0813	0.920667	262.94
23250	ATPase phospholipid transporting 11A	ATP11A	-0.0377	0.771	0.860106	0.1297	-0.291063	3237.07
100874205	ATP11A antisense RNA 1	ATP11A-AS1	0.475	0.062	0.188925	0.2544	1.86637	21.52
23200	ATPase phospholipid transporting 11B (putative)	ATP11B	-0.138	0.0787	0.215948	0.0783	-1.7584	1080.19
286410	ATPase phospholipid transporting 11C	ATP11C	0.191	0.131	0.289413	0.1266	1.5093	169.52
479	ATPase H+/K+ transporting non-gastric alpha2 subunit	ATP12A	-0.24	0.361	0.541169	0.2625	-0.91311	15.73
57130	ATPase 13A1	ATP13A1	-0.0783	0.43	0.60458	0.0991	-0.789839	3993.82
23400	ATPase cation transporting 13A2	ATP13A2	-0.15	0.274	0.454301	0.1367	-1.09389	25112.8
79572	ATPase 13A3	ATP13A3	-0.0543	0.523	0.683119	0.0851	-0.638256	1381.64
401106	ATP13A3 divergent transcript	ATP13A3-DT	0.00535	0.968	0.981416	0.1341	0.0398882	82.11
84239	ATPase 13A4	ATP13A4	0.347	0.109	0.258458	0.2166	1.60333	996.44
101929198	ATP13A4 antisense RNA 1	ATP13A4-AS1	0.345	0.0934	0.237147	0.2055	1.67761	14.83
344905	ATPase 13A5	ATP13A5	0.271	0.0328	0.136439	0.127	2.13433	52.6
100874218	ATP13A5 antisense RNA 1	ATP13A5-AS1	-0.195	0.169	0.336173	0.1418	-1.37543	17.77
476	ATPase Na+/K+ transporting subunit alpha 1	ATP1A1	-0.375	0.0136	0.0893193	0.1522	-2.46762	31760
84852	ATP1A1 antisense RNA 1	ATP1A1-AS1	-0.346	0.0187	0.103794	0.1471	-2.35232	6082.55
477	ATPase Na+/K+ transporting subunit alpha 2	ATP1A2	0.22	0.169	0.336416	0.1602	1.37472	44238.9
478	ATPase Na+/K+ transporting subunit alpha 3	ATP1A3	-0.39	0.0373	0.145583	0.1871	-2.0829	95508.1
480	ATPase Na+/K+ transporting subunit alpha 4	ATP1A4	0.0562	0.73	0.833508	0.1632	0.344508	454.56
481	ATPase Na+/K+ transporting subunit beta 1	ATP1B1	-0.238	0.0164	0.0972802	0.099	-2.40066	21979.3
482	ATPase Na+/K+ transporting subunit beta 2	ATP1B2	0.369	0.0446	0.158653	0.184	2.0082	12107.3
483	ATPase Na+/K+ transporting subunit beta 3	ATP1B3	-0.119	0.143	0.304574	0.0815	-1.46464	1795.47
91419	ATP23 metallopeptidase and ATP synthase assembly factor homolog	ATP23	0.154	0.069	0.200425	0.0849	1.81822	129.37
487	ATPase sarcoplasmic/endoplasmic reticulum Ca2+ transporting 1	ATP2A1	0.433	0.01	0.0772968	0.1683	2.57482	112.61
100289092	ATP2A1 antisense RNA 1	ATP2A1-AS1	0.584	0.00488	0.0542195	0.2075	2.81471	10.59
488	ATPase sarcoplasmic/endoplasmic reticulum Ca2+ transporting 2	ATP2A2	-0.29	0.0165	0.0976013	0.1208	-2.39774	25969.8
489	ATPase sarcoplasmic/endoplasmic reticulum Ca2+ transporting 3	ATP2A3	-0.139	0.468	0.63706	0.1911	-0.726252	415.35
490	ATPase plasma membrane Ca2+ transporting 1	ATP2B1	-0.204	0.0844	0.224841	0.1183	-1.7258	20239.6
338758	ATP2B1 antisense RNA 1	ATP2B1-AS1	-0.0189	0.845	0.90628	0.0969	-0.195522	976.58
491	ATPase plasma membrane Ca2+ transporting 2	ATP2B2	-0.502	0.00452	0.0523881	0.1768	-2.83943	23201.3
492	ATPase plasma membrane Ca2+ transporting 3	ATP2B3	-0.309	0.0272	0.124578	0.14	-2.20812	6593.58
493	ATPase plasma membrane Ca2+ transporting 4	ATP2B4	-0.141	0.228	0.404721	0.1167	-1.20675	12667.5
27032	ATPase secretory pathway Ca2+ transporting 1	ATP2C1	-0.216	0.0246	0.118632	0.0961	-2.24752	4378.87
9914	ATPase secretory pathway Ca2+ transporting 2	ATP2C2	0.0221	0.812	0.885693	0.0932	0.237676	469.58
105371374	ATP2C2 antisense RNA 1	ATP2C2-AS1	-0.0118	0.907	0.945157	0.1012	-0.116549	165.29
495	ATPase H+/K+ transporting subunit alpha	ATP4A	-0.0809	0.721	0.827353	0.226	-0.357754	34.75
498	ATP synthase F1 subunit alpha	ATP5F1A	-0.264	0.00981	0.0763952	0.1023	-2.58236	13203.8
506	ATP synthase F1 subunit beta	ATP5F1B	-0.307	0.0101	0.0776844	0.1192	-2.57132	20010
509	ATP synthase F1 subunit gamma	ATP5F1C	-0.146	0.0581	0.182144	0.0771	-1.89519	1901.84
513	ATP synthase F1 subunit delta	ATP5F1D	0.0675	0.563	0.71349	0.1165	0.578961	1575.59
514	ATP synthase F1 subunit epsilon	ATP5F1E	-0.00405	0.97	0.98209	0.1068	-0.0378852	388.79
93974	ATP synthase inhibitory factor subunit 1	ATP5IF1	0.0641	0.394	0.571753	0.0753	0.85149	1680.31
516	ATP synthase membrane subunit c locus 1	ATP5MC1	-0.0677	0.491	0.656171	0.0982	-0.689451	839.13
517	ATP synthase membrane subunit c locus 2	ATP5MC2	0.112	0.218	0.393178	0.0906	1.23292	1515.28
518	ATP synthase membrane subunit c locus 3	ATP5MC3	-0.159	0.0767	0.212945	0.0898	-1.77013	2545.71
521	ATP synthase membrane subunit e	ATP5ME	0.157	0.255	0.43333	0.1382	1.13915	374.57
9551	ATP synthase membrane subunit f	ATP5MF	0.12	0.267	0.447162	0.1082	1.10954	660.44
100526740	ATP5MF-PTCD1 readthrough	ATP5MF-PTCD1	-0.0258	0.684	0.801743	0.0635	-0.406728	716.88
10632	ATP synthase membrane subunit g	ATP5MG	-0.0721	0.326	0.50728	0.0735	-0.981635	1511.57
267020	ATP synthase membrane subunit g like	ATP5MGL	0.543	0.00354	0.0458736	0.1861	2.91658	17.36
9556	ATP synthase membrane subunit j	ATP5MJ	-0.0481	0.633	0.764989	0.1006	-0.47807	1444.32
84833	ATP synthase membrane subunit k	ATP5MK	0.0349	0.716	0.824758	0.0961	0.363393	660.37
515	ATP synthase peripheral stalk-membrane subunit b	ATP5PB	-0.11	0.161	0.326667	0.0786	-1.40044	2355.62
10476	ATP synthase peripheral stalk subunit d	ATP5PD	0.0193	0.852	0.910958	0.1036	0.18657	1102.21
522	ATP synthase peripheral stalk subunit F6	ATP5PF	-0.118	0.206	0.37904	0.0933	-1.26512	702.44
539	ATP synthase peripheral stalk subunit OSCP	ATP5PO	-0.0807	0.337	0.517211	0.084	-0.960504	2022.25
4508	ATP synthase F0 subunit 6	ATP6	0.658	0.000366	0.0144127	0.1845	3.56336	606518
537	ATPase H+ transporting accessory protein 1	ATP6AP1	-0.2	0.0984	0.244336	0.1213	-1.65277	13416.6
158960	ATP6AP1 divergent transcript	ATP6AP1-DT	0.0719	0.612	0.75014	0.1419	0.506554	36.09
92270	ATPase H+ transporting accessory protein 1 like (pseudogene)	ATP6AP1L	0.341	0.00542	0.0570255	0.1227	2.7811	345.07
10159	ATPase H+ transporting accessory protein 2	ATP6AP2	-0.211	0.0428	0.155354	0.1044	-2.02598	5795.85
535	ATPase H+ transporting V0 subunit a1	ATP6V0A1	-0.253	0.0317	0.134239	0.1176	-2.14798	29380.1
23545	ATPase H+ transporting V0 subunit a2	ATP6V0A2	0.0654	0.462	0.632507	0.0889	0.735384	442.41
50617	ATPase H+ transporting V0 subunit a4	ATP6V0A4	0.377	0.0691	0.200534	0.2074	1.81751	25.55
533	ATPase H+ transporting V0 subunit b	ATP6V0B	-0.166	0.0471	0.162469	0.0834	-1.98583	3475.77
527	ATPase H+ transporting V0 subunit c	ATP6V0C	-0.0975	0.371	0.550941	0.109	-0.893706	15129.5
9114	ATPase H+ transporting V0 subunit d1	ATP6V0D1	-0.187	0.101	0.247669	0.1141	-1.64018	7808.97
101927837	ATP6V0D1 divergent transcript	ATP6V0D1-DT	0.422	0.00164	0.0313925	0.1339	3.14937	240.74
8992	ATPase H+ transporting V0 subunit e1	ATP6V0E1	0.169	0.103	0.250151	0.1039	1.63111	433.95
155066	ATPase H+ transporting V0 subunit e2	ATP6V0E2	-0.111	0.184	0.354636	0.0834	-1.3277	15674.4
401431	ATP6V0E2 antisense RNA 1	ATP6V0E2-AS1	-0.0454	0.554	0.706727	0.0767	-0.591825	299.04
523	ATPase H+ transporting V1 subunit A	ATP6V1A	-0.41	0.0102	0.0780787	0.1597	-2.56816	14072.1
525	ATPase H+ transporting V1 subunit B1	ATP6V1B1	0.926	1.59e-05	0.0046793	0.2146	4.31569	32.97
101927750	ATP6V1B1 antisense RNA 1	ATP6V1B1-AS1	0.671	0.00169	0.0319742	0.2138	3.13987	12.24
526	ATPase H+ transporting V1 subunit B2	ATP6V1B2	-0.404	0.0129	0.0867392	0.1625	-2.48774	14999.4
528	ATPase H+ transporting V1 subunit C1	ATP6V1C1	-0.33	0.0214	0.110674	0.1433	-2.30021	8972.91
245973	ATPase H+ transporting V1 subunit C2	ATP6V1C2	-0.0395	0.509	0.67184	0.0598	-0.660586	527.14
51382	ATPase H+ transporting V1 subunit D	ATP6V1D	-0.186	0.039	0.14862	0.0899	-2.06419	3105.5
529	ATPase H+ transporting V1 subunit E1	ATP6V1E1	-0.242	0.02	0.106778	0.1041	-2.32687	6615.86
90423	ATPase H+ transporting V1 subunit E2	ATP6V1E2	0.0846	0.358	0.538605	0.0921	0.918718	337.6
9296	ATPase H+ transporting V1 subunit F	ATP6V1F	0.0259	0.757	0.850436	0.0835	0.31004	2491.25
100130705	ATP6V1F neighbor	ATP6V1FNB	-0.0589	0.652	0.77964	0.1306	-0.450916	830.38
9550	ATPase H+ transporting V1 subunit G1	ATP6V1G1	0.0259	0.699	0.812156	0.067	0.387028	1078.95
534	ATPase H+ transporting V1 subunit G2	ATP6V1G2	-0.17	0.12	0.273548	0.1095	-1.5558	8726.54
100532737	ATP6V1G2-DDX39B readthrough (NMD candidate)	ATP6V1G2-DDX39B	-0.0912	0.0363	0.143692	0.0435	-2.09378	1872.01
51606	ATPase H+ transporting V1 subunit H	ATP6V1H	-0.181	0.09	0.233329	0.1067	-1.69522	4983.2
538	ATPase copper transporting alpha	ATP7A	-0.115	0.182	0.351308	0.0864	-1.33608	250.33
540	ATPase copper transporting beta	ATP7B	0.119	0.173	0.341878	0.0874	1.36118	567.03
4509	ATP synthase F0 subunit 8	ATP8	0.661	0.00032	0.0138418	0.1838	3.59816	141006
10396	ATPase phospholipid transporting 8A1	ATP8A1	-0.293	0.0449	0.159154	0.1462	-2.00582	8827.94
51761	ATPase phospholipid transporting 8A2	ATP8A2	-0.284	0.0371	0.145341	0.1365	-2.08413	5378.2
5205	ATPase phospholipid transporting 8B1	ATP8B1	0.442	0.00163	0.0313566	0.1401	3.1512	237.78
100505549	ATP8B1 antisense RNA 1	ATP8B1-AS1	0.247	0.0995	0.245718	0.1502	1.64723	29.82
57198	ATPase phospholipid transporting 8B2	ATP8B2	-0.0168	0.771	0.859784	0.0575	-0.291545	2070.14
148229	ATPase phospholipid transporting 8B3	ATP8B3	0.22	0.182	0.35243	0.1649	1.33359	32.86
79895	ATPase phospholipid transporting 8B4 (putative)	ATP8B4	0.116	0.387	0.564566	0.1338	0.865539	66.34
158381	ATPase phospholipid transporting 8B5, pseudogene	ATP8B5P	0.38	0.0316	0.134107	0.1769	2.14903	24.84
10079	ATPase phospholipid transporting 9A (putative)	ATP9A	-0.352	0.0115	0.0830936	0.1396	-2.52578	24853.9
374868	ATPase phospholipid transporting 9B (putative)	ATP9B	0.0211	0.637	0.76819	0.0448	0.471641	1394.12
64756	ATP synthase mitochondrial F1 complex assembly factor 1	ATPAF1	-0.206	0.0288	0.128157	0.0944	-2.18685	2787.37
91647	ATP synthase mitochondrial F1 complex assembly factor 2	ATPAF2	0.037	0.468	0.63706	0.051	0.726324	458.88
134145	ATP synthase c subunit lysine N-methyltransferase	ATPSCKMT	0.0079	0.91	0.946717	0.0696	0.113462	311.89
545	ATR serine/threonine kinase	ATR	-0.187	0.0601	0.185804	0.0997	-1.87996	855.05
51374	all-trans retinoic acid induced differentiation factor	ATRAID	-0.0408	0.493	0.658598	0.0596	-0.684801	505.75
84126	ATR interacting protein	ATRIP	0.0838	0.265	0.444215	0.0752	1.11525	335.28
111822955	ATRIP-TREX1 readthrough	ATRIP-TREX1	0.0858	0.26	0.439505	0.0762	1.12619	307.68
8455	attractin	ATRN	-0.284	0.0419	0.153955	0.1398	-2.03434	5812.01
26033	attractin like 1	ATRNL1	-0.36	0.0159	0.096371	0.1492	-2.41082	7488.4
546	ATRX chromatin remodeler	ATRX	0.025	0.711	0.821368	0.0674	0.370346	13629.5
6310	ataxin 1	ATXN1	-0.26	0.00896	0.0728799	0.0996	-2.61368	5899.89
25814	ataxin 10	ATXN10	-0.325	0.0105	0.0790649	0.127	-2.56042	4382.22
101928433	ATXN1 antisense RNA 1	ATXN1-AS1	-0.0941	0.322	0.503109	0.095	-0.989879	391.49
342371	ataxin 1 like	ATXN1L	-0.026	0.694	0.808555	0.0661	-0.393215	2183.09
6311	ataxin 2	ATXN2	0.0147	0.79	0.872351	0.0553	0.266842	3715.27
102723619	ATXN2 antisense RNA	ATXN2-AS	0.209	0.281	0.461574	0.1937	1.07915	17.29
11273	ataxin 2 like	ATXN2L	-0.0749	0.335	0.515014	0.0776	-0.965067	8363.81
4287	ataxin 3	ATXN3	-0.0539	0.384	0.561943	0.0619	-0.871276	900.83
6314	ataxin 7	ATXN7	0.101	0.0976	0.243363	0.0609	1.65652	818.2
222255	ataxin 7 like 1	ATXN7L1	0.243	0.000395	0.0150273	0.0687	3.54327	1005.96
127002	ataxin 7 like 2	ATXN7L2	0.0794	0.51	0.672679	0.1205	0.658686	773.38
56970	ataxin 7 like 3	ATXN7L3	-0.136	0.168	0.334828	0.0989	-1.37944	11309.6
101926967	ATXN7L3 antisense RNA 1	ATXN7L3-AS1	0.173	0.0857	0.226788	0.1005	1.71864	85.18
552889	ataxin 7 like 3B	ATXN7L3B	-0.312	0.00675	0.0631821	0.1153	-2.70869	8339.38
6315	ATXN8 opposite strand lncRNA	ATXN8OS	0.0326	0.839	0.902206	0.1603	0.203334	23.74
549	AU RNA binding methylglutaconyl-CoA hydratase	AUH	-0.148	0.0097	0.0759517	0.0572	-2.58647	848.73
79000	aurora kinase A and ninein interacting protein	AUNIP	-0.0521	0.349	0.529976	0.0556	-0.936566	434.92
550	AUP1 lipid droplet regulating VLDL assembly factor	AUP1	0.114	0.0834	0.223664	0.066	1.73104	1523.13
6790	aurora kinase A	AURKA	-0.223	0.0131	0.0875751	0.0898	-2.48131	47.98
54998	aurora kinase A interacting protein 1	AURKAIP1	-0.0216	0.85	0.909657	0.1138	-0.189382	1094.74
6791	aurora kinase A pseudogene 1	AURKAP1	0.3	0.0901	0.233354	0.177	1.69496	12.27
6795	aurora kinase C	AURKC	0.195	0.245	0.423294	0.1674	1.16346	38.07
26053	activator of transcription and developmental regulator AUTS2	AUTS2	-0.00918	0.878	0.926965	0.06	-0.153109	1782.26
57099	apoptosis and caspase activation inhibitor	AVEN	0.153	0.0383	0.147339	0.0736	2.07185	371.6
10677	advillin	AVIL	0.195	0.0108	0.080367	0.0766	2.54985	406.72
23080	AVL9 cell migration associated	AVL9	-0.254	0.0281	0.12635	0.1157	-2.19657	2760.18
60370	arginine vasopressin induced 1	AVPI1	-0.129	0.192	0.363261	0.099	-1.30472	760.85
552	arginine vasopressin receptor 1A	AVPR1A	-0.166	0.387	0.56509	0.1917	-0.864483	61.63
553	arginine vasopressin receptor 1B	AVPR1B	0.182	0.417	0.593584	0.2243	0.811161	18.07
554	arginine vasopressin receptor 2	AVPR2	-0.465	0.0189	0.10419	0.198	-2.34848	31.03
8312	axin 1	AXIN1	0.119	0.169	0.336232	0.0868	1.37524	1561.25
8313	axin 2	AXIN2	-0.0623	0.292	0.47265	0.059	-1.05465	785.25
558	AXL receptor tyrosine kinase	AXL	0.429	0.00388	0.0480221	0.1485	2.88813	1687.82
563	alpha-2-glycoprotein 1, zinc-binding	AZGP1	-0.302	0.155	0.318752	0.2125	-1.42354	79.84
64343	5-azacytidine induced 2	AZI2	-0.0748	0.331	0.512337	0.0771	-0.971163	1109.84
51582	antizyme inhibitor 1	AZIN1	-0.288	0.0117	0.0833441	0.1141	-2.52221	4741.55
113451	antizyme inhibitor 2	AZIN2	-0.109	0.105	0.253097	0.067	-1.62161	1685.86
566	azurocidin 1	AZU1	0.408	0.031	0.132499	0.189	2.15752	35.18
567	beta-2-microglobulin	B2M	0.206	0.0427	0.155266	0.1017	2.02668	3483.71
8706	beta-1,3-N-acetylgalactosaminyltransferase 1 (globoside blood group)	B3GALNT1	-0.213	0.104	0.252361	0.1311	-1.62407	1627.92
148789	beta-1,3-N-acetylgalactosaminyltransferase 2	B3GALNT2	0.0871	0.136	0.295275	0.0584	1.49213	420.51
8708	beta-1,3-galactosyltransferase 1	B3GALT1	-0.288	0.0483	0.164801	0.1456	-1.97497	205.43
105616981	B3GALT1 antisense RNA 1	B3GALT1-AS1	-0.355	0.0388	0.148283	0.172	-2.06628	21.44
8707	beta-1,3-galactosyltransferase 2	B3GALT2	-0.241	0.0986	0.244694	0.146	-1.65158	1976.96
8705	beta-1,3-galactosyltransferase 4	B3GALT4	-0.204	0.114	0.265344	0.1288	-1.5809	183.16
10317	beta-1,3-galactosyltransferase 5	B3GALT5	-0.0545	0.612	0.749582	0.1073	-0.507666	163.39
114041	B3GALT5 antisense RNA 1	B3GALT5-AS1	0.15	0.154	0.317741	0.1049	1.42701	79.22
126792	beta-1,3-galactosyltransferase 6	B3GALT6	-0.121	0.231	0.408701	0.1011	-1.19775	892.3
100288842	beta-1,3-galactosyltransferase 9	B3GALT9	0.0445	0.689	0.804735	0.111	0.400506	66.87
27087	beta-1,3-glucuronyltransferase 1	B3GAT1	-0.0985	0.319	0.500038	0.0988	-0.996751	27219.4
283177	B3GAT1 divergent transcript	B3GAT1-DT	0.183	0.193	0.364275	0.1408	1.30161	74.62
135152	beta-1,3-glucuronyltransferase 2	B3GAT2	-0.0814	0.285	0.466046	0.0761	-1.06965	2137.36
26229	beta-1,3-glucuronyltransferase 3	B3GAT3	-0.072	0.433	0.607304	0.0919	-0.783649	2047.88
145173	beta 3-glucosyltransferase	B3GLCT	-0.148	0.109	0.25882	0.0923	-1.60179	605.48
10678	UDP-GlcNAc:betaGal beta-1,3-N-acetylglucosaminyltransferase 2	B3GNT2	-0.124	0.304	0.48553	0.121	-1.02746	480.9
79369	UDP-GlcNAc:betaGal beta-1,3-N-acetylglucosaminyltransferase 4	B3GNT4	0.00621	0.921	0.953565	0.0628	0.0988521	670.32
84002	UDP-GlcNAc:betaGal beta-1,3-N-acetylglucosaminyltransferase 5	B3GNT5	0.00277	0.986	0.991498	0.1551	0.017843	122.08
93010	UDP-GlcNAc:betaGal beta-1,3-N-acetylglucosaminyltransferase 7	B3GNT7	0.311	0.0916	0.235201	0.1842	1.68683	404.28
374907	UDP-GlcNAc:betaGal beta-1,3-N-acetylglucosaminyltransferase 8	B3GNT8	0.0842	0.465	0.635091	0.1152	0.73066	47.07
84752	UDP-GlcNAc:betaGal beta-1,3-N-acetylglucosaminyltransferase 9	B3GNT9	-0.0132	0.876	0.925691	0.0849	-0.155768	524.61
146712	UDP-GlcNAc:betaGal beta-1,3-N-acetylglucosaminyltransferase like 1	B3GNTL1	0.0707	0.317	0.498356	0.0707	1.00017	477.94
2583	beta-1,4-N-acetyl-galactosaminyltransferase 1	B4GALNT1	-0.168	0.1	0.246809	0.1024	-1.64322	4419.06
283358	beta-1,4-N-acetyl-galactosaminyltransferase 3	B4GALNT3	0.119	0.333	0.513167	0.1224	0.968741	762.79
338707	beta-1,4-N-acetyl-galactosaminyltransferase 4	B4GALNT4	0.0477	0.769	0.858518	0.1623	0.294054	8639.51
2683	beta-1,4-galactosyltransferase 1	B4GALT1	0.301	0.0673	0.197628	0.1643	1.82957	210.12
101929639	B4GALT1 antisense RNA 1	B4GALT1-AS1	0.0154	0.913	0.948959	0.1418	0.108705	25.34
8704	beta-1,4-galactosyltransferase 2	B4GALT2	-0.0508	0.732	0.83446	0.1484	-0.342724	7480.5
8703	beta-1,4-galactosyltransferase 3	B4GALT3	-0.109	0.137	0.296523	0.0731	-1.48883	1454.28
8702	beta-1,4-galactosyltransferase 4	B4GALT4	0.122	0.131	0.289145	0.081	1.50987	221.13
100874201	B4GALT4 antisense RNA 1	B4GALT4-AS1	0.0728	0.623	0.758825	0.1482	0.491096	10.65
9334	beta-1,4-galactosyltransferase 5	B4GALT5	-0.255	0.0166	0.0978592	0.1065	-2.39519	2837.8
9331	beta-1,4-galactosyltransferase 6	B4GALT6	-0.269	0.0236	0.11612	0.1186	-2.26392	2595.15
11285	beta-1,4-galactosyltransferase 7	B4GALT7	-0.019	0.766	0.856879	0.0641	-0.297288	830.5
11041	beta-1,4-glucuronyltransferase 1	B4GAT1	-0.234	0.112	0.262334	0.147	-1.5903	10752.5
102724064	B4GAT1 divergent transcript	B4GAT1-DT	0.127	0.0783	0.215366	0.0724	1.76067	92.25
27077	B9 domain containing 1	B9D1	0.12	0.0324	0.135663	0.0563	2.1389	2177.03
80776	B9 domain containing 2	B9D2	-0.0128	0.877	0.925691	0.0824	-0.155376	96.59
79870	BAALC binder of MAP3K1 and KLF4	BAALC	-0.0203	0.787	0.870836	0.0751	-0.270491	10516
100499183	BAALC antisense RNA 1	BAALC-AS1	1.24	0.000743	0.0205231	0.3677	3.37334	64.4
157556	BAALC antisense RNA 2	BAALC-AS2	0.38	0.0226	0.113327	0.1664	2.28069	11.51
570	bile acid-CoA:amino acid N-acyltransferase	BAAT	-0.00531	0.963	0.978398	0.1143	-0.0464269	74.24
29086	BRISC and BRCA1 A complex member 1	BABAM1	-0.151	0.117	0.269046	0.096	-1.5689	2431.82
9577	BRISC and BRCA1 A complex member 2	BABAM2	-0.0859	0.227	0.404101	0.0711	-1.20821	1014.93
100302650	BABAM2 antisense RNA 1	BABAM2-AS1	0.0603	0.802	0.879974	0.2405	0.250667	101.97
23621	beta-secretase 1	BACE1	-0.199	0.071	0.20351	0.11	-1.80522	7725.86
100379571	BACE1 antisense RNA	BACE1-AS	-0.241	0.0436	0.156801	0.1195	-2.01764	406.36
25825	beta-secretase 2	BACE2	0.475	0.00741	0.0664173	0.1774	2.67802	333.43
571	BTB domain and CNC homolog 1	BACH1	0.012	0.902	0.942071	0.0981	0.12266	471.8
60468	BTB domain and CNC homolog 2	BACH2	0.00368	0.963	0.978136	0.0782	0.0470159	534.67
572	BCL2 associated agonist of cell death	BAD	0.00397	0.972	0.983908	0.1146	0.0346787	1358.06
573	BAG cochaperone 1	BAG1	-0.0676	0.449	0.62132	0.0892	-0.757625	1331.82
9532	BAG cochaperone 2	BAG2	-0.0258	0.692	0.807308	0.0652	-0.395853	510.64
9531	BAG cochaperone 3	BAG3	0.691	0.029	0.128808	0.3164	2.18341	1602.26
9530	BAG cochaperone 4	BAG4	-0.158	0.134	0.292389	0.1051	-1.49984	2325.16
9529	BAG cochaperone 5	BAG5	-0.188	0.0112	0.0820582	0.0742	-2.53708	1859.75
7917	BAG cochaperone 6	BAG6	-0.163	0.17	0.337185	0.1189	-1.37298	11287.8
85319	BAGE family member 2, pseudogene	BAGE2	0.0495	0.77	0.859479	0.1693	0.292223	18.71
57597	BAH domain and coiled-coil containing 1	BAHCC1	-0.165	0.193	0.363979	0.1264	-1.30254	3268.2
22893	bromo adjacent homology domain containing 1	BAHD1	-0.123	0.145	0.307016	0.0846	-1.45767	1922.95
10458	BAR/IMD domain containing adaptor protein 2	BAIAP2	0.102	0.259	0.438652	0.0903	1.12824	14826.8
440465	BAIAP2 divergent transcript	BAIAP2-DT	-0.139	0.231	0.408487	0.1158	-1.19821	4904.75
55971	BAR/IMD domain containing adaptor protein 2 like 1	BAIAP2L1	0.383	0.00495	0.054687	0.1362	2.81039	69.47
80115	BAR/IMD domain containing adaptor protein 2 like 2	BAIAP2L2	0.0621	0.588	0.733191	0.1147	0.5411	581.93
8938	BAI1 associated protein 3	BAIAP3	-0.134	0.393	0.569833	0.1562	-0.855085	20031.8
578	BCL2 antagonist/killer 1	BAK1	0.127	0.153	0.316548	0.0885	1.43059	360.91
25805	BMP and activin membrane bound inhibitor	BAMBI	-0.0728	0.569	0.718136	0.1277	-0.570036	278.48
8815	BAF nuclear assembly factor 1	BANF1	0.0696	0.411	0.587839	0.0846	0.821893	819.42
55024	B cell scaffold protein with ankyrin repeats 1	BANK1	-0.077	0.466	0.635825	0.1056	-0.729329	36.13
54971	BTG3 associated nuclear protein	BANP	0.147	0.0728	0.206434	0.082	1.79411	588
8314	BRCA1 associated protein 1	BAP1	-0.0557	0.647	0.775773	0.1216	-0.458199	15924.4
580	BRCA1 associated RING domain 1	BARD1	0.474	0.0252	0.120059	0.2116	2.23769	196.68
8538	BARX homeobox 2	BARX2	0.0514	0.791	0.873024	0.1938	0.265061	15.02
10409	brain abundant membrane attached signal protein 1	BASP1	-0.0888	0.36	0.540469	0.0971	-0.915115	19968
285696	BASP1 antisense RNA 1	BASP1-AS1	-0.162	0.0576	0.18143	0.0852	-1.89841	340.85
116071	basic leucine zipper ATF-like transcription factor 2	BATF2	0.638	0.00176	0.0326503	0.2038	3.12857	79.71
55509	basic leucine zipper ATF-like transcription factor 3	BATF3	0.144	0.224	0.400811	0.118	1.21613	105.52
581	BCL2 associated X, apoptosis regulator	BAX	0.0182	0.828	0.894633	0.0838	0.217686	343.14
11177	bromodomain adjacent to zinc finger domain 1A	BAZ1A	0.637	0.000891	0.0230654	0.1915	3.32295	517.83
112268124	BAZ1A antisense RNA 1	BAZ1A-AS1	0.0432	0.767	0.857524	0.146	0.295714	31.43
9031	bromodomain adjacent to zinc finger domain 1B	BAZ1B	0.109	0.275	0.45529	0.1	1.09166	6012.87
11176	bromodomain adjacent to zinc finger domain 2A	BAZ2A	0.0149	0.7	0.81313	0.0388	0.384944	3475.42
29994	bromodomain adjacent to zinc finger domain 2B	BAZ2B	0.321	0.0435	0.156526	0.1587	2.01925	5522.07
643072	BAZ2B antisense RNA 1	BAZ2B-AS1	0.00484	0.952	0.972382	0.0802	0.0603787	106.97
27113	BCL2 binding component 3	BBC3	0.125	0.367	0.546684	0.1389	0.902177	326.88
92482	BBSome interacting protein 1	BBIP1	0.127	0.0796	0.217515	0.0726	1.75276	366.71
79095	bublin coiled coil protein	BBLN	0.0632	0.63	0.76334	0.1312	0.481946	1883.09
80127	basal body orientation factor 1	BBOF1	0.256	0.0271	0.124472	0.116	2.20939	1029.86
8424	gamma-butyrobetaine hydroxylase 1	BBOX1	0.267	0.187	0.358401	0.2023	1.31818	198.46
582	Bardet-Biedl syndrome 1	BBS1	0.0135	0.854	0.912304	0.0737	0.183551	2809.21
79738	Bardet-Biedl syndrome 10	BBS10	-0.113	0.243	0.42133	0.0968	-1.16772	568.54
166379	Bardet-Biedl syndrome 12	BBS12	-0.147	0.243	0.421235	0.1255	-1.16812	276.11
583	Bardet-Biedl syndrome 2	BBS2	-0.00808	0.932	0.96045	0.0953	-0.0847557	1762.04
585	Bardet-Biedl syndrome 4	BBS4	-0.129	0.0714	0.204224	0.0716	-1.80312	724.73
129880	Bardet-Biedl syndrome 5	BBS5	0.00626	0.92	0.952781	0.0624	0.100274	832.14
55212	Bardet-Biedl syndrome 7	BBS7	-0.295	0.018	0.101885	0.1247	-2.36543	1360.27
27241	Bardet-Biedl syndrome 9	BBS9	-0.109	0.0592	0.184322	0.0578	-1.88693	423.41
56987	BBX high mobility group box domain containing	BBX	0.122	0.361	0.540878	0.1329	0.914176	4674.95
4059	basal cell adhesion molecule (Lutheran blood group)	BCAM	0.152	0.254	0.43301	0.1334	1.14019	1575.37
63827	brevican	BCAN	0.143	0.289	0.469695	0.1343	1.06129	12168.5
105371453	BCAN antisense RNA 1	BCAN-AS1	0.102	0.405	0.582159	0.1224	0.832115	898.94
55973	B cell receptor associated protein 29	BCAP29	-0.171	0.0463	0.161169	0.0859	-1.99274	1504.84
10134	B cell receptor associated protein 31	BCAP31	-0.0641	0.469	0.63798	0.0885	-0.724355	3311.34
9564	BCAR1 scaffold protein, Cas family member	BCAR1	-0.108	0.348	0.529065	0.1148	-0.938403	7046.33
8412	BCAR3 adaptor protein, NSP family member	BCAR3	0.159	0.135	0.293876	0.1066	1.49537	410.98
100129046	BCAR3 antisense RNA 1	BCAR3-AS1	0.217	0.11	0.259941	0.136	1.59808	27.68
8537	brain enriched myelin associated protein 1	BCAS1	0.752	0.00357	0.0460868	0.2581	2.91355	19941.1
10286	BCAS2 pre-mRNA processing factor	BCAS2	-0.14	0.0623	0.189454	0.075	-1.86434	855.77
54828	BCAS3 microtubule associated cell migration factor	BCAS3	-0.17	0.0493	0.166668	0.0865	-1.96612	2219.38
55653	breast carcinoma amplified sequence 4	BCAS4	-0.216	0.0378	0.146437	0.1041	-2.07721	502.42
586	branched chain amino acid transaminase 1	BCAT1	-0.396	0.0017	0.0320893	0.1262	-3.1376	1735.25
587	branched chain amino acid transaminase 2	BCAT2	0.402	0.00227	0.0366578	0.1316	3.05268	635.65
56647	BRCA2 and CDKN1A interacting protein	BCCIP	0.153	0.0394	0.149252	0.0742	2.06034	672.21
144233	BCDIN3 domain containing RNA methyltransferase	BCDIN3D	-0.13	0.0627	0.190032	0.0699	-1.86123	154.74
100286844	BCDIN3D antisense RNA 1	BCDIN3D-AS1	-0.154	0.0712	0.203736	0.0856	-1.80443	222.69
590	butyrylcholinesterase	BCHE	-0.0792	0.556	0.708609	0.1346	-0.588241	154.04
593	branched chain keto acid dehydrogenase E1 subunit alpha	BCKDHA	-0.0622	0.476	0.644798	0.0873	-0.712136	1782.38
594	branched chain keto acid dehydrogenase E1 subunit beta	BCKDHB	0.112	0.199	0.370827	0.087	1.28381	646.67
10295	branched chain keto acid dehydrogenase kinase	BCKDK	-0.0729	0.351	0.532006	0.0782	-0.93227	2088.65
8915	BCL10 immune signaling adaptor	BCL10	0.0939	0.25	0.429252	0.0817	1.14934	156.31
646626	BCL10 antisense RNA 1	BCL10-AS1	0.144	0.431	0.605334	0.1827	0.788158	9.24
53335	BCL11 transcription factor A	BCL11A	-0.169	0.0487	0.16561	0.0855	-1.97141	2352.97
64919	BCL11 transcription factor B	BCL11B	-0.0832	0.388	0.566204	0.0965	-0.862512	1489.3
596	BCL2 apoptosis regulator	BCL2	0.0752	0.501	0.665755	0.1119	0.67228	788.18
598	BCL2 like 1	BCL2L1	-0.042	0.551	0.704481	0.0704	-0.596082	3842.76
10017	BCL2 like 10	BCL2L10	-0.0397	0.823	0.892398	0.1771	-0.224108	10.88
10018	BCL2 like 11	BCL2L11	0.199	0.0132	0.0881498	0.0804	2.47732	273.46
83596	BCL2 like 12	BCL2L12	0.338	0.0156	0.0956473	0.1399	2.41908	96.18
23786	BCL2 like 13	BCL2L13	-0.198	0.0126	0.08614	0.0796	-2.49376	2413.2
79370	BCL2 like 14	BCL2L14	0.666	0.000442	0.0158379	0.1895	3.51384	18.8
440603	BCL2 like 15	BCL2L15	0.0942	0.522	0.682146	0.147	0.640785	28.94
105372589	BCL2L1 antisense RNA 1	BCL2L1-AS1	0.432	0.0459	0.16055	0.2162	1.99597	33.93
599	BCL2 like 2	BCL2L2	-0.111	0.162	0.327093	0.079	-1.39907	10516.8
100529063	BCL2L2-PABPN1 readthrough	BCL2L2-PABPN1	0.165	0.0177	0.101117	0.0694	2.37135	2811.75
602	BCL3 transcription coactivator	BCL3	0.828	0.00114	0.0265031	0.2545	3.25326	251.45
604	BCL6 transcription repressor	BCL6	0.397	0.00464	0.05296	0.1402	2.83121	2752.02
255877	BCL6B transcription repressor	BCL6B	0.648	0.0194	0.105375	0.2771	2.33846	187.03
605	BAF chromatin remodeling complex subunit BCL7A	BCL7A	-0.0669	0.335	0.515585	0.0695	-0.963584	2180.3
9275	BAF chromatin remodeling complex subunit BCL7B	BCL7B	-0.0449	0.465	0.635402	0.0615	-0.730062	1602.08
9274	BAF chromatin remodeling complex subunit BCL7C	BCL7C	0.215	0.0378	0.146437	0.1034	2.07706	514.4
607	BCL9 transcription coactivator	BCL9	-0.0478	0.49	0.655997	0.0693	-0.689961	1546.55
283149	BCL9 like	BCL9L	-0.0483	0.632	0.764854	0.1009	-0.478367	2660.47
9774	BCL2 associated transcription factor 1	BCLAF1	-0.0544	0.512	0.673507	0.0829	-0.656327	5942.86
256643	BCLAF1 and THRAP3 family member 3	BCLAF3	0.218	0.0493	0.16673	0.1108	1.96563	611.43
53630	beta-carotene oxygenase 1	BCO1	0.751	9.37e-06	0.0037846	0.1695	4.43121	199.76
83875	beta-carotene oxygenase 2	BCO2	0.166	0.0946	0.238807	0.0991	1.67153	197.72
54880	BCL6 corepressor	BCOR	-0.0466	0.61	0.748519	0.0913	-0.510296	1015.07
63035	BCL6 corepressor like 1	BCORL1	-0.0902	0.192	0.363441	0.0692	-1.3042	889.14
613	BCR activator of RhoGEF and GTPase	BCR	-0.115	0.319	0.500208	0.1153	-0.996349	10437.1
400892	BCR pseudogene 2	BCRP2	0.196	0.0509	0.169303	0.1003	1.95215	178.08
644165	BCR pseudogene 3	BCRP3	0.0868	0.319	0.499996	0.087	0.997043	149.71
617	BCS1 homolog, ubiquinol-cytochrome c reductase complex chaperone	BCS1L	-0.021	0.717	0.824815	0.0579	-0.363038	598.58
618	brain cytoplasmic RNA 1	BCYRN1	0.647	0.00508	0.0553637	0.2308	2.80212	229.22
622	3-hydroxybutyrate dehydrogenase 1	BDH1	0.0489	0.487	0.653546	0.0702	0.695834	2162.68
56898	3-hydroxybutyrate dehydrogenase 2	BDH2	0.252	0.0695	0.201102	0.139	1.81534	512.8
624	bradykinin receptor B2	BDKRB2	0.316	0.0632	0.190978	0.17	1.85751	78.65
627	brain derived neurotrophic factor	BDNF	0.139	0.522	0.682605	0.2171	0.639744	713.28
497258	BDNF antisense RNA	BDNF-AS	0.0953	0.311	0.49262	0.0941	1.01242	285.52
55814	B double prime 1, subunit of RNA polymerase III transcription initiation factor IIIB	BDP1	0.161	0.275	0.455005	0.1476	1.09241	5784.7
146227	brain expressed associated with NEDD4 1	BEAN1	0.129	0.208	0.381249	0.1022	1.26003	567.62
101927726	BEAN1 antisense RNA 1	BEAN1-AS1	0.297	0.00898	0.0728799	0.1137	2.61288	34.25
8678	beclin 1	BECN1	-0.318	0.00129	0.0279623	0.0988	-3.21864	1401.18
57596	brain enriched guanylate kinase associated	BEGAIN	0.0177	0.888	0.933134	0.1258	0.140708	4999.68
57673	BEN domain containing 3	BEND3	-0.134	0.151	0.314064	0.0929	-1.43756	115.53
650623	BEN domain containing 3 pseudogene 3	BEND3P3	-0.079	0.422	0.597406	0.0983	-0.803573	785.41
389206	BEN domain containing 4	BEND4	-0.301	0.0461	0.160821	0.1507	-1.9948	252.74
79656	BEN domain containing 5	BEND5	-0.0623	0.463	0.632925	0.0848	-0.734612	432.07
221336	BEN domain containing 6	BEND6	-0.25	0.00878	0.071982	0.0954	-2.62066	1916.99
222389	BEN domain containing 7	BEND7	0.148	0.0974	0.24297	0.0893	1.65756	277.03
7439	bestrophin 1	BEST1	0.145	0.19	0.361262	0.1108	1.30991	11581.6
144453	bestrophin 3	BEST3	0.844	0.000207	0.0114733	0.2275	3.70992	71.51
266675	bestrophin 4	BEST4	0.0281	0.803	0.880275	0.113	0.248841	101.87
10282	Bet1 golgi vesicular membrane trafficking protein	BET1	-0.0597	0.357	0.536894	0.0648	-0.921715	262.75
51272	Bet1 golgi vesicular membrane trafficking protein like	BET1L	-0.0283	0.625	0.760165	0.0579	-0.488584	1769.52
55859	brain expressed X-linked 1	BEX1	-0.105	0.232	0.409316	0.0878	-1.19642	5049.41
84707	brain expressed X-linked 2	BEX2	-0.0642	0.475	0.643442	0.0898	-0.714978	2186.52
27018	brain expressed X-linked 3	BEX3	-0.0998	0.354	0.534302	0.1076	-0.927263	4494.65
56271	brain expressed X-linked 4	BEX4	-0.0223	0.772	0.86092	0.0769	-0.289773	5770.83
340542	brain expressed X-linked 5	BEX5	-0.00115	0.989	0.993629	0.0861	-0.013341	914.32
51283	bifunctional apoptosis regulator	BFAR	-0.0906	0.104	0.251984	0.0557	-1.62543	906.03
631	beaded filament structural protein 1	BFSP1	-0.104	0.255	0.433962	0.0918	-1.13755	152.61
8419	beaded filament structural protein 2	BFSP2	0.228	0.24	0.417952	0.1941	1.17604	12.63
632	bone gamma-carboxyglutamate protein	BGLAP	0.297	0.0149	0.0936175	0.1219	2.43421	57.29
633	biglycan	BGN	0.374	0.00535	0.0566701	0.1344	2.78492	3013.71
168620	basic helix-loop-helix family member a15	BHLHA15	-0.195	0.383	0.5614	0.224	-0.872476	41.34
727857	basic helix-loop-helix family member a9	BHLHA9	-0.228	0.307	0.488669	0.2229	-1.02092	16.31
27319	basic helix-loop-helix family member e22	BHLHE22	-0.118	0.494	0.658853	0.173	-0.684323	442.93
401463	BHLHE22 antisense RNA 1	BHLHE22-AS1	-0.253	0.16	0.324759	0.1798	-1.40668	62.45
8553	basic helix-loop-helix family member e40	BHLHE40	0.0584	0.586	0.731433	0.1071	0.544857	4175.5
100507582	BHLHE40 antisense RNA 1	BHLHE40-AS1	0.0114	0.914	0.948959	0.105	0.108562	117.3
79365	basic helix-loop-helix family member e41	BHLHE41	-0.0985	0.402	0.579751	0.1176	-0.837418	1607.72
635	betaine--homocysteine S-methyltransferase	BHMT	-0.302	0.0605	0.186345	0.1606	-1.87747	41.54
23743	betaine--homocysteine S-methyltransferase 2	BHMT2	0.306	0.00266	0.0400421	0.1017	3.00418	120.45
80114	BicC family RNA binding protein 1	BICC1	-0.0429	0.672	0.793658	0.1012	-0.423366	171.06
636	BICD cargo adaptor 1	BICD1	-0.111	0.266	0.445498	0.1	-1.11275	2300.79
23299	BICD cargo adaptor 2	BICD2	-0.156	0.0919	0.235288	0.0924	-1.68546	2830.6
92558	BICD family like cargo adaptor 1	BICDL1	-0.00083	0.994	0.99619	0.102	-0.0081373	2219.01
146439	BICD family like cargo adaptor 2	BICDL2	-0.191	0.154	0.317741	0.1338	-1.42706	40.21
29998	BRD4 interacting chromatin remodeling complex associated protein	BICRA	-0.0599	0.681	0.799839	0.1458	-0.4107	1596.77
23506	BICRA like chromatin remodeling complex associated protein	BICRAL	-0.209	0.0418	0.153739	0.1026	-2.03593	1538.59
637	BH3 interacting domain death agonist	BID	-0.0488	0.442	0.614752	0.0634	-0.769488	1289.74
638	BCL2 interacting killer	BIK	0.526	0.00574	0.0588851	0.1904	2.76229	47.27
274	bridging integrator 1	BIN1	-0.0832	0.4	0.576833	0.0988	-0.842414	9616.41
51411	bridging integrator 2	BIN2	-0.475	0.0095	0.0752061	0.183	-2.59366	81.41
55909	bridging integrator 3	BIN3	0.245	0.00803	0.0692268	0.0926	2.6507	428.23
80094	BIN3 intronic transcript 1	BIN3-IT1	1.03	3.1e-06	0.0028391	0.2198	4.66417	52.62
329	baculoviral IAP repeat containing 2	BIRC2	-0.151	0.0318	0.134508	0.0704	-2.1463	1017.17
330	baculoviral IAP repeat containing 3	BIRC3	0.0303	0.772	0.86092	0.1046	0.289852	254.74
57448	baculoviral IAP repeat containing 6	BIRC6	-0.0808	0.353	0.534076	0.087	-0.927993	3799.95
103752586	BIRC6 antisense RNA 2	BIRC6-AS2	0.627	0.00526	0.0562175	0.2248	2.79051	14.74
105221694	BST2 interferon stimulated positive regulator	BISPR	0.507	0.000597	0.0185592	0.1477	3.4328	37.47
54841	basic, immunoglobulin-like variable motif containing	BIVM	0.0394	0.459	0.629847	0.0531	0.740833	533.39
100533467	BIVM-ERCC5 readthrough	BIVM-ERCC5	0.0115	0.803	0.880173	0.0461	0.249222	811.69
101669762	BLACAT1 overlapping LEMD1 locus	BLACAT1	-0.29	0.0304	0.131391	0.1339	-2.16532	52.43
10904	BLCAP apoptosis inducing factor	BLCAP	-0.105	0.226	0.403238	0.0869	-1.21043	6443.43
641	BLM RecQ like helicase	BLM	0.0877	0.443	0.616245	0.1143	0.767007	139.54
642	bleomycin hydrolase	BLMH	-0.0841	0.0922	0.235655	0.0499	-1.68406	560.13
29760	B cell linker	BLNK	-0.184	0.241	0.41911	0.1568	-1.1732	62.33
2647	biogenesis of lysosomal organelles complex 1 subunit 1	BLOC1S1	0.0474	0.629	0.76277	0.0982	0.483059	494.03
100528022	BLOC1S1-RDH5 readthrough	BLOC1S1-RDH5	0.048	0.6	0.741501	0.0915	0.524488	439.08
282991	biogenesis of lysosomal organelles complex 1 subunit 2	BLOC1S2	-0.144	0.0616	0.188253	0.0771	-1.86937	1062.84
388552	biogenesis of lysosomal organelles complex 1 subunit 3	BLOC1S3	-0.0419	0.462	0.632539	0.0569	-0.735301	415.27
55330	biogenesis of lysosomal organelles complex 1 subunit 4	BLOC1S4	0.0161	0.815	0.887856	0.069	0.233581	167.24
63915	biogenesis of lysosomal organelles complex 1 subunit 5	BLOC1S5	-0.0413	0.562	0.713256	0.0712	-0.579463	78.69
100526836	BLOC1S5-TXNDC5 readthrough (NMD candidate)	BLOC1S5-TXNDC5	-0.0891	0.193	0.363801	0.0684	-1.30302	658.82
26258	biogenesis of lysosomal organelles complex 1 subunit 6	BLOC1S6	-0.149	0.0973	0.242761	0.09	-1.65829	2758.97
84162	bridge-like lipid transfer protein family member 1	BLTP1	-0.223	0.062	0.188925	0.1194	-1.86627	8455.81
9703	bridge-like lipid transfer protein family member 2	BLTP2	-0.257	0.0298	0.130096	0.1181	-2.17323	8224.5
54887	bridge-like lipid transfer protein family member 3A	BLTP3A	-0.195	0.0369	0.144861	0.0935	-2.08708	904.78
23074	bridge-like lipid transfer protein family member 3B	BLTP3B	-0.295	0.0226	0.113327	0.1292	-2.28059	2025.91
644	biliverdin reductase A	BLVRA	-0.12	0.154	0.318489	0.0843	-1.42422	499.39
645	biliverdin reductase B	BLVRB	0.0805	0.438	0.611327	0.1038	0.775831	502.8
8548	basic leucine zipper nuclear factor 1	BLZF1	-0.0321	0.662	0.786913	0.0736	-0.436714	647.58
406	basic helix-loop-helix ARNT like 1	BMAL1	-0.201	0.0263	0.122445	0.0906	-2.22141	962.67
56938	basic helix-loop-helix ARNT like 2	BMAL2	-0.173	0.0527	0.172629	0.0894	-1.93699	778
101928646	BMAL2 antisense RNA 1	BMAL2-AS1	-0.351	0.0316	0.134003	0.1632	-2.14985	14.76
89927	bMERB domain containing 1	BMERB1	-0.226	0.0444	0.1582	0.1123	-2.01075	11686.8
90427	Bcl2 modifying factor	BMF	-0.155	0.199	0.37055	0.1202	-1.28497	54.76
648	BMI1 proto-oncogene, polycomb ring finger	BMI1	-0.129	0.0654	0.194618	0.0703	-1.84233	946.94
649	bone morphogenetic protein 1	BMP1	0.173	0.12	0.273548	0.1109	1.55577	672.27
650	bone morphogenetic protein 2	BMP2	0.0165	0.9	0.940626	0.1315	0.125752	243.22
55589	BMP2 inducible kinase	BMP2K	-0.0181	0.87	0.921717	0.1108	-0.163122	593.03
651	bone morphogenetic protein 3	BMP3	-0.135	0.361	0.540926	0.1482	-0.913924	62.01
652	bone morphogenetic protein 4	BMP4	0.0726	0.693	0.807524	0.1835	0.395459	65.33
653	bone morphogenetic protein 5	BMP5	0.035	0.903	0.94258	0.288	0.121476	16.08
654	bone morphogenetic protein 6	BMP6	0.461	0.00197	0.0341177	0.1489	3.09541	248.88
655	bone morphogenetic protein 7	BMP7	0.198	0.209	0.383207	0.1578	1.25564	1434.76
353500	bone morphogenetic protein 8a	BMP8A	0.101	0.151	0.314633	0.0704	1.43593	870.63
656	bone morphogenetic protein 8b	BMP8B	-0.0357	0.707	0.818479	0.0952	-0.375337	370.28
168667	BMP binding endothelial regulator	BMPER	-0.317	0.0292	0.129176	0.1455	-2.18016	960.71
657	bone morphogenetic protein receptor type 1A	BMPR1A	-0.0217	0.823	0.892441	0.0969	-0.223857	687.22
658	bone morphogenetic protein receptor type 1B	BMPR1B	0.362	0.143	0.304727	0.2473	1.46409	574.52
659	bone morphogenetic protein receptor type 2	BMPR2	-0.275	0.0463	0.161169	0.1382	-1.99301	8204.49
9790	BMS1 ribosome biogenesis factor	BMS1	-0.0292	0.645	0.774278	0.0634	-0.460498	1513.1
399761	BMS1 pseudogene 1	BMS1P1	0.178	0.195	0.366835	0.1377	1.29502	185.32
101929959	BMS1 pseudogene 14	BMS1P14	0.261	0.118	0.271567	0.1672	1.56162	83.63
101101776	BMS1 pseudogene 17	BMS1P17	0.606	0.0096	0.0756252	0.234	2.59007	24.03
414763	BMS1 pseudogene 18	BMS1P18	0.643	0.00612	0.0601215	0.2347	2.74143	22.67
642826	BMS1 pseudogene 2	BMS1P2	0.127	0.398	0.574984	0.1501	0.84569	167.27
96610	BMS1 pseudogene 20	BMS1P20	-0.232	0.00332	0.0446282	0.079	-2.93615	605.67
100288974	BMS1 pseudogene 21	BMS1P21	0.514	0.00207	0.0348307	0.167	3.07981	17.89
106480334	BMS1 pseudogene 22	BMS1P22	0.142	0.515	0.676167	0.2175	0.65133	29.12
728034	BMS1 pseudogene 23	BMS1P23	-0.108	0.153	0.316592	0.0758	-1.43021	429.98
113939912	BMS1P2-AGAP9 readthrough	BMS1P2-AGAP9	0.255	0.0932	0.236984	0.1519	1.67852	236.35
729096	BMS1 pseudogene 4	BMS1P4	0.197	0.116	0.268414	0.1253	1.57093	74.2
113939925	BMS1P4-AGAP5 readthrough	BMS1P4-AGAP5	0.219	0.0414	0.153184	0.1073	2.03908	212.37
154743	base methyltransferase of 25S rRNA 2 homolog	BMT2	-0.127	0.219	0.395225	0.1032	-1.22815	483.66
660	BMX non-receptor tyrosine kinase	BMX	-0.131	0.548	0.702699	0.2175	-0.600024	11.72
54796	basonuclin 2	BNC2	0.212	0.287	0.467896	0.1992	1.06476	52.76
662	BCL2 interacting protein 1	BNIP1	-0.0426	0.589	0.733901	0.0789	-0.539581	157.19
663	BCL2 interacting protein 2	BNIP2	0.183	0.0926	0.236222	0.1087	1.6817	689.93
664	BCL2 interacting protein 3	BNIP3	-0.0763	0.305	0.486408	0.0744	-1.0252	2878.51
665	BCL2 interacting protein 3 like	BNIP3L	-0.212	0.0182	0.102538	0.0899	-2.36187	4668.47
389384	BCL2 interacting protein 5	BNIP5	-0.251	0.274	0.454114	0.2289	-1.09467	14.35
149428	BCL2 interacting protein like	BNIPL	0.553	0.00246	0.0382995	0.1825	3.02876	31.38
91653	BOC cell adhesion associated, oncogene regulated	BOC	0.23	0.0139	0.0905346	0.0935	2.45857	703.52
91272	biorientation of chromosomes in cell division 1	BOD1	-0.194	0.00458	0.0527914	0.0684	-2.8352	584.12
259282	biorientation of chromosomes in cell division 1 like 1	BOD1L1	0.0803	0.322	0.502432	0.081	0.991309	9598.48
666	BCL2 family apoptosis regulator BOK	BOK	-0.16	0.424	0.599087	0.2001	-0.800253	4856.51
100379249	BOK antisense RNA 1	BOK-AS1	-0.228	0.386	0.563958	0.2633	-0.867013	71.67
51027	bolA family member 1	BOLA1	-0.0478	0.585	0.730993	0.0875	-0.545855	170.82
552900	bolA family member 2	BOLA2	-0.00561	0.96	0.976938	0.1116	-0.0503023	83.27
654483	bolA family member 2B	BOLA2B	0.164	0.244	0.42204	0.1403	1.1662	45.07
107282092	BOLA2-SMG1P6 readthrough	BOLA2-SMG1P6	-0.207	0.0392	0.148895	0.1005	-2.06227	261.17
388962	bolA family member 3	BOLA3	0.0146	0.891	0.935481	0.1064	0.136852	159.97
100507171	BOLA3 divergent transcript	BOLA3-DT	-0.0754	0.319	0.499996	0.0756	-0.997126	1030.39
66037	boule homolog, RNA binding protein	BOLL	0.864	0.000464	0.0162321	0.2468	3.50062	20.56
23246	BOP1 ribosomal biogenesis factor	BOP1	-0.117	0.386	0.56418	0.1355	-0.866647	3600.67
79866	BORA aurora kinase A activator	BORA	0.296	0.00255	0.0390641	0.098	3.01689	100.77
118426	BLOC-1 related complex subunit 5	BORCS5	-0.239	0.0147	0.0928022	0.0978	-2.44024	1164.53
54785	BLOC-1 related complex subunit 6	BORCS6	-0.155	0.134	0.293252	0.1038	-1.49732	470.59
119032	BLOC-1 related complex subunit 7	BORCS7	0.053	0.52	0.680803	0.0824	0.643506	744.24
100528007	BORCS7-ASMT readthrough (NMD candidate)	BORCS7-ASMT	0.168	0.0256	0.120963	0.075	2.23255	211.96
729991	BLOC-1 related complex subunit 8	BORCS8	-0.043	0.6	0.741421	0.0819	-0.524661	620.12
4207	BORCS8-MEF2B readthrough	BORCS8-MEF2B	-0.0524	0.46	0.630784	0.071	-0.738626	289.79
669	bisphosphoglycerate mutase	BPGM	-0.157	0.0509	0.169286	0.0802	-1.95225	659.26
670	biphenyl hydrolase like	BPHL	0.0768	0.386	0.56368	0.0885	0.867585	456.69
10380	3'(2'), 5'-bisphosphate nucleotidase 1	BPNT1	-0.0484	0.468	0.63706	0.0667	-0.726329	502.27
54928	3'(2'), 5'-bisphosphate nucleotidase 2	BPNT2	-0.223	0.0297	0.130096	0.1027	-2.17342	4547.96
2186	bromodomain PHD finger transcription factor	BPTF	0.218	0.121	0.275274	0.1404	1.5501	10982.9
673	B-Raf proto-oncogene, serine/threonine kinase	BRAF	-0.355	0.00481	0.0538454	0.126	-2.81954	2873.67
8315	BRCA1 associated protein	BRAP	-0.124	0.0471	0.162567	0.0624	-1.98545	964.33
221927	BRCA1 associated ATM activator 1	BRAT1	0.0104	0.919	0.952073	0.1015	0.102126	2119.29
672	BRCA1 DNA repair associated	BRCA1	0.129	0.399	0.576475	0.1531	0.843037	330.04
675	BRCA2 DNA repair associated	BRCA2	0.283	0.137	0.297011	0.1903	1.48667	35.53
79184	BRCA1/BRCA2-containing complex subunit 3	BRCC3	-0.0518	0.567	0.716812	0.0906	-0.572551	890.32
23774	bromodomain containing 1	BRD1	0.00292	0.959	0.976493	0.0569	0.0514401	1516.27
6046	bromodomain containing 2	BRD2	-0.0542	0.459	0.630235	0.0733	-0.739917	8668.77
8019	bromodomain containing 3	BRD3	0.06	0.382	0.560779	0.0687	0.87394	3219.73
266655	BRD3 opposite strand	BRD3OS	-0.0808	0.255	0.43333	0.0709	-1.13919	2949.29
23476	bromodomain containing 4	BRD4	0.0546	0.379	0.558149	0.0621	0.879265	7499.95
29117	bromodomain containing 7	BRD7	0.0815	0.237	0.415734	0.069	1.18222	1833.01
23629	bromodomain containing 7 pseudogene 3	BRD7P3	0.282	0.239	0.417246	0.2391	1.17845	22.82
10902	bromodomain containing 8	BRD8	-0.125	0.0811	0.219938	0.0715	-1.74449	2266.16
65980	bromodomain containing 9	BRD9	-0.00862	0.87	0.921746	0.0529	-0.163029	1823.74
676	bromodomain testis associated	BRDT	0.412	0.0445	0.158437	0.2049	2.00941	18.52
2972	BRF1 RNA polymerase III transcription initiation factor subunit	BRF1	-0.0677	0.507	0.670369	0.102	-0.66387	4388.82
55290	BRF2 RNA polymerase III transcription initiation factor subunit	BRF2	-0.12	0.109	0.25818	0.0751	-1.60449	471.73
25798	brain protein I3	BRI3	0.122	0.188	0.359139	0.0925	1.31623	521.4
140707	BRI3 binding protein	BRI3BP	-0.0992	0.177	0.345884	0.0735	-1.34956	2485.31
283870	BRICHOS domain containing 5	BRICD5	0.16	0.268	0.448454	0.1447	1.10716	550.71
1620	BMP/retinoic acid inducible neural specific 1	BRINP1	-0.169	0.0854	0.22628	0.0982	-1.72041	4118.45
57795	BMP/retinoic acid inducible neural specific 2	BRINP2	-0.0526	0.54	0.697041	0.0858	-0.612513	3671.53
339479	BMP/retinoic acid inducible neural specific 3	BRINP3	0.0177	0.867	0.92063	0.1062	0.166858	776.98
101929120	BRINP3 divergent transcript	BRINP3-DT	0.045	0.642	0.771884	0.0968	0.465386	107.84
83990	BRCA1 interacting helicase 1	BRIP1	0.315	0.0644	0.192731	0.1702	1.8493	27.81
55299	biogenesis of ribosomes BRX1	BRIX1	-0.0527	0.321	0.502115	0.0531	-0.992013	331.33
55845	BRICK1 subunit of SCAR/WAVE actin nucleating complex	BRK1	-0.115	0.124	0.279398	0.0748	-1.53825	1942.86
79173	break repair meiotic recombinase recruitment factor 1	BRME1	0.093	0.258	0.43737	0.0822	1.13135	207.37
25855	BRMS1 transcriptional repressor and anoikis regulator	BRMS1	0.0244	0.794	0.874803	0.0934	0.261101	523
84312	BRMS1 like transcriptional repressor	BRMS1L	-0.299	0.0195	0.105863	0.1279	-2.33546	1226.93
148362	BRO1 domain and CAAX motif containing	BROX	-0.0991	0.274	0.454301	0.0906	-1.0939	1161.07
7862	bromodomain and PHD finger containing 1	BRPF1	-0.00959	0.894	0.93643	0.0718	-0.133542	1078
27154	bromodomain and PHD finger containing 3	BRPF3	-0.185	0.0463	0.161183	0.0927	-1.99264	3440.3
102723648	BRPF3 antisense RNA 1	BRPF3-AS1	0.202	0.217	0.392213	0.164	1.23468	83.81
680	bombesin receptor subtype 3	BRS3	0.161	0.483	0.650347	0.2297	0.701404	12.14
84446	BR serine/threonine kinase 1	BRSK1	-0.0546	0.679	0.797518	0.1318	-0.414431	20002.2
9024	BR serine/threonine kinase 2	BRSK2	-0.03	0.789	0.872088	0.112	-0.26784	8391.09
54014	bromodomain and WD repeat domain containing 1	BRWD1	-0.132	0.113	0.264148	0.0835	-1.58481	6201.14
103091865	BRWD1 antisense RNA 2	BRWD1-AS2	0.134	0.384	0.56237	0.1543	0.870026	24.52
254065	bromodomain and WD repeat domain containing 3	BRWD3	0.12	0.227	0.403949	0.0994	1.2086	661.3
26580	BSCL2 lipid droplet biogenesis associated, seipin	BSCL2	-0.21	0.0501	0.167642	0.1072	-1.95934	6330.33
55108	BSD domain containing 1	BSDC1	-0.0132	0.823	0.892441	0.0589	-0.223579	5444.68
682	basigin (Ok blood group)	BSG	0.155	0.0177	0.101039	0.0654	2.37191	17181
8927	bassoon presynaptic cytomatrix protein	BSN	-0.341	0.0488	0.165844	0.1729	-1.97057	36478.8
100132677	BSN divergent transcript	BSN-DT	0.199	0.146	0.307891	0.1366	1.45486	36.28
54836	B-box and SPRY domain containing	BSPRY	-0.0752	0.587	0.731877	0.1383	-0.543647	193.45
683	bone marrow stromal cell antigen 1	BST1	0.211	0.126	0.281771	0.1376	1.53162	43.19
684	bone marrow stromal cell antigen 2	BST2	0.475	0.00395	0.04849	0.1648	2.88201	269.21
9044	B-TFIID TATA-box binding protein associated factor 1	BTAF1	-0.0458	0.608	0.74727	0.0894	-0.512584	1172.05
53339	BTB domain containing 1	BTBD1	-0.242	0.0277	0.125347	0.1099	-2.20146	3594.87
84280	BTB domain containing 10	BTBD10	-0.33	0.00918	0.0738329	0.1267	-2.60534	2363.08
118663	BTB domain containing 16	BTBD16	0.176	0.449	0.621646	0.2329	0.756881	29.05
388419	BTB domain containing 17	BTBD17	0.0287	0.876	0.925691	0.1849	0.155455	111.69
643376	BTB domain containing 18	BTBD18	0.434	0.00545	0.0572891	0.1562	2.77916	106.89
149478	BTB domain containing 19	BTBD19	0.484	0.00928	0.0743309	0.1859	2.60158	126.12
55643	BTB domain containing 2	BTBD2	0.0734	0.536	0.693886	0.1185	0.618819	17105.7
22903	BTB domain containing 3	BTBD3	-0.291	0.0133	0.0883471	0.1175	-2.4756	4619.82
90135	BTB domain containing 6	BTBD6	-0.115	0.263	0.442729	0.1023	-1.11901	2875.58
55727	BTB domain containing 7	BTBD7	0.162	0.0411	0.15237	0.0792	2.043	889.91
284697	BTB domain containing 8	BTBD8	0.175	0.181	0.350044	0.131	1.33883	80.94
114781	BTB domain containing 9	BTBD9	-0.161	0.114	0.265759	0.1022	-1.57944	6485.41
101929425	BTBD9 antisense RNA 1	BTBD9-AS1	1.46	1.02e-05	0.0038503	0.3297	4.41393	40.14
685	betacellulin	BTC	0.0236	0.863	0.917289	0.1363	0.172988	38.09
686	biotinidase	BTD	-0.166	0.0921	0.235524	0.0984	-1.68447	1024.54
689	basic transcription factor 3	BTF3	0.0911	0.277	0.457351	0.0838	1.08762	1451.59
91408	basic transcription factor 3 like 4	BTF3L4	-0.191	0.0218	0.111477	0.0832	-2.29442	1578.08
694	BTG anti-proliferation factor 1	BTG1	0.174	0.0606	0.186428	0.0927	1.87665	711.91
7832	BTG anti-proliferation factor 2	BTG2	0.161	0.481	0.648316	0.2279	0.705465	1170.24
10950	BTG anti-proliferation factor 3	BTG3	0.0235	0.833	0.898531	0.1117	0.210708	133.28
110806272	BTG3 antisense RNA 1	BTG3-AS1	-0.0608	0.689	0.804831	0.1518	-0.400299	24.35
54766	BTG anti-proliferation factor 4	BTG4	0.431	0.123	0.278637	0.2795	1.54038	12.79
695	Bruton tyrosine kinase	BTK	-0.232	0.225	0.402602	0.1917	-1.21204	31.89
11120	butyrophilin subfamily 2 member A1	BTN2A1	-0.132	0.0521	0.171715	0.0677	-1.9426	1060.4
10385	butyrophilin subfamily 2 member A2	BTN2A2	0.0734	0.434	0.607877	0.0938	0.782549	123.61
54718	butyrophilin subfamily 2 member A3, pseudogene	BTN2A3P	0.175	0.335	0.515498	0.1811	0.963862	12.02
11119	butyrophilin subfamily 3 member A1	BTN3A1	0.0631	0.506	0.66972	0.0948	0.665017	380.31
11118	butyrophilin subfamily 3 member A2	BTN3A2	0.0941	0.432	0.606456	0.1198	0.78558	455.65
10384	butyrophilin subfamily 3 member A3	BTN3A3	-0.2	0.0427	0.155306	0.0988	-2.02646	349.08
56244	butyrophilin like 2	BTNL2	-0.0657	0.663	0.787519	0.1507	-0.435776	42.57
153579	butyrophilin like 9	BTNL9	0.615	6.17e-06	0.0028391	0.1361	4.5206	973.38
8945	beta-transducin repeat containing E3 ubiquitin protein ligase	BTRC	-0.279	0.0189	0.104233	0.1188	-2.34757	4223.58
699	BUB1 mitotic checkpoint serine/threonine kinase	BUB1	0.0961	0.579	0.726705	0.1733	0.554426	16.72
701	BUB1 mitotic checkpoint serine/threonine kinase B	BUB1B	0.329	0.038	0.146744	0.1586	2.07503	28.18
106821730	BUB1B-PAK6 readthrough	BUB1B-PAK6	-0.192	0.242	0.420017	0.164	-1.17091	3711.35
9184	BUB3 mitotic checkpoint protein	BUB3	-0.137	0.0385	0.147772	0.0661	-2.06939	1120.71
84811	BUD13 homolog	BUD13	-0.186	0.000729	0.0204226	0.0552	-3.37835	275.96
114049	BUD23 rRNA methyltransferase and ribosome maturation factor	BUD23	0.00567	0.923	0.955005	0.059	0.0961104	1017.17
8896	BUD31 homolog	BUD31	-0.0551	0.471	0.640125	0.0765	-0.7206	423.85
11149	blood vessel epicardial substance	BVES	0.00775	0.962	0.9778	0.1621	0.0478046	256.85
154442	BVES antisense RNA 1	BVES-AS1	-0.0759	0.666	0.789821	0.176	-0.431396	15.79
705	bystin like	BYSL	-0.123	0.148	0.311424	0.0851	-1.44506	426.07
9689	basic leucine zipper and W2 domains 1	BZW1	-0.223	0.00812	0.0695041	0.0842	-2.64709	2053.2
101927795	BZW1 antisense RNA 1	BZW1-AS1	-0.213	0.172	0.340181	0.1557	-1.36563	12.68
28969	basic leucine zipper and W2 domains 2	BZW2	-0.146	0.11	0.259203	0.0915	-1.60025	564.69
414152	chromosome 10 open reading frame 105	C10orf105	0.189	0.448	0.621223	0.2492	0.758023	232.91
387723	chromosome 10 open reading frame 143	C10orf143	-0.0965	0.403	0.580305	0.1154	-0.836294	92.57
256815	chromosome 10 open reading frame 67	C10orf67	0.198	0.114	0.265342	0.1252	1.58097	45.11
143379	chromosome 10 open reading frame 82	C10orf82	0.0355	0.806	0.882572	0.1447	0.245228	39.96
80007	chromosome 10 open reading frame 88	C10orf88	-0.101	0.191	0.362741	0.0772	-1.30626	484.86
399815	C10orf88B (pseudogene)	C10orf88B	-0.0389	0.712	0.821769	0.1053	-0.369093	35.21
118611	chromosome 10 open reading frame 90	C10orf90	-0.165	0.426	0.600892	0.2073	-0.796758	435.71
79946	chromosome 10 open reading frame 95	C10orf95	-0.0932	0.324	0.504664	0.0944	-0.986516	59.31
100505761	C10orf95 antisense RNA 1	C10orf95-AS1	0.0835	0.305	0.485853	0.0813	1.02635	251.24
29125	chromosome 11 open reading frame 21	C11orf21	-0.137	0.408	0.584341	0.1652	-0.828081	18.71
53838	chromosome 11 open reading frame 24	C11orf24	0.00525	0.943	0.966929	0.0731	0.0718231	760.06
160298	chromosome 11 open reading frame 42	C11orf42	0.0434	0.696	0.810301	0.1113	0.390111	335.99
28970	chromosome 11 open reading frame 54	C11orf54	0.0219	0.789	0.872168	0.0819	0.267653	545.02
10944	chromosome 11 open reading frame 58	C11orf58	-0.064	0.238	0.416679	0.0543	-1.17959	2192.24
160140	chromosome 11 open reading frame 65	C11orf65	0.153	0.282	0.462959	0.1419	1.07654	50.37
83638	chromosome 11 open reading frame 68	C11orf68	-0.0847	0.338	0.518128	0.0884	-0.958424	3407.66
54494	chromosome 11 open reading frame 71	C11orf71	-0.0729	0.284	0.465333	0.0681	-1.07123	273.73
79703	chromosome 11 open reading frame 80	C11orf80	0.083	0.31	0.491442	0.0818	1.01525	608.02
399947	chromosome 11 open reading frame 87	C11orf87	-0.428	0.0163	0.0972042	0.1781	-2.40141	4448.9
100131378	chromosome 11 open reading frame 91	C11orf91	0.726	0.00352	0.0457682	0.2486	2.91853	18.56
387763	chromosome 11 open reading frame 96	C11orf96	0.619	0.0545	0.175598	0.3218	1.92321	674.9
643037	chromosome 11 open reading frame 97	C11orf97	-0.405	0.00579	0.059037	0.1466	-2.75964	19.61
102288414	chromosome 11 open reading frame 98	C11orf98	-0.00743	0.941	0.965589	0.0997	-0.0744713	114.18
91298	chromosome 12 open reading frame 29	C12orf29	-0.0656	0.42	0.5956	0.0813	-0.806769	841.69
57102	chromosome 12 open reading frame 4	C12orf4	-0.278	0.0129	0.0868061	0.1116	-2.48703	598.3
283461	chromosome 12 open reading frame 40	C12orf40	-0.287	0.194	0.364982	0.2212	-1.29973	61.65
374470	chromosome 12 open reading frame 42	C12orf42	0.122	0.51	0.672679	0.1851	0.65882	24.53
64897	chromosome 12 open reading frame 43	C12orf43	-0.0412	0.556	0.707983	0.0699	-0.589255	1571.2
121273	chromosome 12 open reading frame 54	C12orf54	0.0453	0.669	0.791457	0.1059	0.427617	35.69
115749	chromosome 12 open reading frame 56	C12orf56	0.473	0.038	0.146744	0.2278	2.0751	34.94
113246	chromosome 12 open reading frame 57	C12orf57	-0.0599	0.547	0.701902	0.0996	-0.601589	551.73
144608	chromosome 12 open reading frame 60	C12orf60	0.0155	0.868	0.920857	0.0937	0.165875	38.7
387882	chromosome 12 open reading frame 75	C12orf75	-0.12	0.295	0.475611	0.1147	-1.04812	116.21
400073	chromosome 12 open reading frame 76	C12orf76	-0.157	0.0203	0.107649	0.0675	-2.32099	1668.12
100507747	chromosome 13 open reading frame 46	C13orf46	0.602	0.00211	0.0351845	0.1959	3.07442	81.4
55017	chromosome 14 open reading frame 119	C14orf119	-0.08	0.137	0.297521	0.0538	-1.48529	452.85
56967	chromosome 14 open reading frame 132	C14orf132	0.0904	0.243	0.42133	0.0774	1.16771	14630.9
283579	chromosome 14 open reading frame 178	C14orf178	0.229	0.0607	0.18664	0.1222	1.87585	19.44
400258	chromosome 14 open reading frame 180	C14orf180	0.0738	0.629	0.762911	0.1528	0.482771	39.83
122525	chromosome 14 open reading frame 28	C14orf28	0.0732	0.413	0.589418	0.0894	0.81874	113.84
60686	chromosome 14 open reading frame 93	C14orf93	0.221	0.0209	0.109208	0.0956	2.30962	145.19
56905	chromosome 15 open reading frame 39	C15orf39	0.238	0.0188	0.104052	0.1011	2.34924	486.58
123207	chromosome 15 open reading frame 40	C15orf40	0.258	0.00379	0.0475731	0.0891	2.89496	878.94
145853	chromosome 15 open reading frame 61	C15orf61	-0.0886	0.219	0.395139	0.0721	-1.22838	306.34
643338	chromosome 15 open reading frame 62	C15orf62	0.173	0.0513	0.170017	0.089	1.94937	189.78
123775	chromosome 16 open reading frame 46	C16orf46	-0.0571	0.226	0.402852	0.0471	-1.21159	369.69
404550	chromosome 16 open reading frame 74	C16orf74	0.31	0.0265	0.122877	0.1395	2.21934	42.1
388284	chromosome 16 open reading frame 86	C16orf86	-0.041	0.67	0.792249	0.0963	-0.426135	216.49
388272	chromosome 16 open reading frame 87	C16orf87	-0.0134	0.882	0.929662	0.0909	-0.147808	559.87
146556	chromosome 16 open reading frame 89	C16orf89	0.281	0.0772	0.213737	0.1589	1.76689	441.12
646174	chromosome 16 open reading frame 90	C16orf90	0.388	0.0838	0.224091	0.2246	1.72899	13.48
146378	chromosome 16 open reading frame 92	C16orf92	0.0354	0.706	0.8175	0.0938	0.377097	410.41
100506581	chromosome 16 open reading frame 95	C16orf95	-0.148	0.189	0.360326	0.1128	-1.313	77.91
342346	chromosome 16 open reading frame 96	C16orf96	0.0772	0.316	0.497276	0.077	1.00213	140.38
388327	chromosome 17 open reading frame 100	C17orf100	-0.23	0.00668	0.0627376	0.0849	-2.71263	160.55
100130311	chromosome 17 open reading frame 107	C17orf107	-0.23	0.121	0.274919	0.1481	-1.55147	363.18
110806298	chromosome 17 open reading frame 113	C17orf113	0.0839	0.289	0.470014	0.0791	1.06045	235.1
124944	chromosome 17 open reading frame 49	C17orf49	0.0176	0.842	0.904178	0.088	0.19969	271.78
146853	chromosome 17 open reading frame 50	C17orf50	0.351	0.0245	0.118533	0.1561	2.24857	15.68
284018	chromosome 17 open reading frame 58	C17orf58	0.0469	0.487	0.653727	0.0675	0.695574	279.29
339210	chromosome 17 open reading frame 67	C17orf67	0.193	0.0384	0.147692	0.0931	2.07004	104.39
64149	chromosome 17 open reading frame 75	C17orf75	-0.148	0.0555	0.177434	0.0774	-1.91485	837.45
284099	chromosome 17 open reading frame 78	C17orf78	0.613	0.00185	0.0332486	0.1971	3.11272	32.39
55028	chromosome 17 open reading frame 80	C17orf80	-0.0578	0.254	0.432543	0.0507	-1.14121	611.47
400566	chromosome 17 open reading frame 97	C17orf97	-0.0013	0.99	0.993822	0.1004	-0.0129913	228.28
83608	chromosome 18 open reading frame 21	C18orf21	-0.0549	0.433	0.607164	0.07	-0.784179	142.18
147339	chromosome 18 open reading frame 25	C18orf25	-0.247	0.00279	0.0409459	0.0828	-2.99022	947.72
497661	chromosome 18 open reading frame 32	C18orf32	-0.00422	0.94	0.965359	0.0562	-0.0751257	1281.65
162681	chromosome 18 open reading frame 54	C18orf54	-0.0948	0.428	0.603335	0.1197	-0.792209	120.28
497259	uncharacterized LOC497259	C18orf61	1.12	3.79e-05	0.005588	0.2719	4.12012	17.49
83636	chromosome 19 open reading frame 12	C19orf12	-0.117	0.147	0.310264	0.0807	-1.44873	3864.58
147685	chromosome 19 open reading frame 18	C19orf18	0.544	0.00342	0.0452845	0.186	2.9268	25.18
148223	chromosome 19 open reading frame 25	C19orf25	0.118	0.22	0.395834	0.0959	1.22666	1352.73
255809	chromosome 19 open reading frame 38	C19orf38	0.31	0.103	0.250573	0.19	1.62965	18.66
84167	chromosome 19 open reading frame 44	C19orf44	0.0646	0.202	0.374163	0.0507	1.27571	673.83
126526	chromosome 19 open reading frame 47	C19orf47	0.131	0.169	0.335839	0.095	1.37658	2094.23
84798	multidrug resistance-related protein	C19orf48	0.0133	0.871	0.921857	0.0818	0.162705	343.4
28974	chromosome 19 open reading frame 53	C19orf53	0.151	0.177	0.345282	0.1119	1.35123	613.84
646457	chromosome 19 open reading frame 67	C19orf67	0.412	0.0666	0.196445	0.2247	1.83421	10.83
55150	chromosome 19 open reading frame 73	C19orf73	0.0315	0.79	0.872481	0.1181	0.26651	62.29
342918	chromosome 19 open reading frame 81	C19orf81	0.286	0.0656	0.194944	0.1552	1.84086	72.4
10438	C1D nuclear receptor corepressor	C1D	-0.211	0.0163	0.0972042	0.0878	-2.40154	376.07
56913	core 1 synthase, glycoprotein-N-acetylgalactosamine 3-beta-galactosyltransferase 1	C1GALT1	0.00782	0.947	0.969319	0.1171	0.0668325	818.78
29071	C1GALT1 specific chaperone 1	C1GALT1C1	-0.18	0.0397	0.14997	0.0875	-2.05693	207.11
728819	C1GALT1 specific chaperone 1 like	C1GALT1C1L	0.145	0.352	0.532728	0.1559	0.930767	12.23
92346	chromosome 1 open reading frame 105	C1orf105	0.461	0.0058	0.059037	0.1672	2.75874	11.84
54955	chromosome 1 open reading frame 109	C1orf109	-0.132	0.0258	0.121521	0.0594	-2.22995	428.46
55732	chromosome 1 open reading frame 112	C1orf112	0.0176	0.775	0.86281	0.0617	0.285553	143.05
79762	chromosome 1 open reading frame 115	C1orf115	-0.23	0.111	0.260894	0.1442	-1.59455	9348.68
79098	chromosome 1 open reading frame 116	C1orf116	-0.318	0.0981	0.244046	0.1925	-1.65423	12.18
127687	chromosome 1 open reading frame 122	C1orf122	0.00799	0.946	0.969093	0.1187	0.0672776	1268.35
128061	chromosome 1 open reading frame 131	C1orf131	0.218	0.0243	0.118123	0.0968	2.25202	146.62
388649	chromosome 1 open reading frame 146	C1orf146	0.281	0.0955	0.240332	0.1688	1.66711	12.09
54991	chromosome 1 open reading frame 159	C1orf159	0.148	0.197	0.368447	0.1146	1.29055	1000.86
128346	chromosome 1 open reading frame 162	C1orf162	-0.0114	0.865	0.918728	0.067	-0.170353	868.12
284498	chromosome 1 open reading frame 167	C1orf167	-0.0949	0.32	0.501272	0.0954	-0.993923	521.09
339448	chromosome 1 open reading frame 174	C1orf174	-0.0851	0.164	0.33034	0.0612	-1.39046	312.76
84886	chromosome 1 open reading frame 198	C1orf198	0.111	0.452	0.624481	0.1471	0.751394	3572.32
81563	chromosome 1 open reading frame 21	C1orf21	-0.135	0.248	0.426619	0.1169	-1.15624	5912.58
127703	chromosome 1 open reading frame 216	C1orf216	-0.33	0.0445	0.15843	0.1642	-2.00972	8376.13
400798	chromosome 1 putative open reading frame 220	C1orf220	0.216	0.0667	0.19664	0.1177	1.83339	64.58
400793	chromosome 1 open reading frame 226	C1orf226	0.179	0.0785	0.215683	0.1014	1.75972	273.92
79169	chromosome 1 open reading frame 35	C1orf35	0.293	0.0574	0.181047	0.1544	1.89999	527.87
25912	chromosome 1 open reading frame 43	C1orf43	-0.189	0.00571	0.0586862	0.0683	-2.76414	4252.6
79078	chromosome 1 open reading frame 50	C1orf50	-0.0666	0.34	0.520493	0.0699	-0.95389	593.45
148423	chromosome 1 open reading frame 52	C1orf52	0.000823	0.989	0.993289	0.0577	0.0142664	1161.18
388722	chromosome 1 open reading frame 53	C1orf53	-0.172	0.294	0.475497	0.1641	-1.0485	15.25
79630	chromosome 1 open reading frame 54	C1orf54	0.48	0.00329	0.0443859	0.1632	2.93971	69.22
54964	chromosome 1 open reading frame 56	C1orf56	0.104	0.163	0.328216	0.0744	1.39604	195.69
148304	chromosome 1 open reading frame 74	C1orf74	-0.284	0.0204	0.107808	0.1226	-2.31923	108.46
127795	chromosome 1 open reading frame 87	C1orf87	0.504	0.0348	0.14036	0.2387	2.11093	10.03
84970	chromosome 1 open reading frame 94	C1orf94	-0.039	0.749	0.845387	0.1216	-0.320455	23.46
712	complement C1q A chain	C1QA	-0.0995	0.724	0.829583	0.2816	-0.353505	175.52
713	complement C1q B chain	C1QB	-0.068	0.826	0.894134	0.3101	-0.219323	211.12
708	complement C1q binding protein	C1QBP	-0.112	0.19	0.361087	0.0857	-1.3106	816.42
714	complement C1q C chain	C1QC	0.0213	0.949	0.970841	0.334	0.0637554	301.04
10882	complement C1q like 1	C1QL1	0.203	0.195	0.365895	0.1562	1.29726	1406.12
165257	complement C1q like 2	C1QL2	0.1	0.439	0.612473	0.1293	0.773568	629.71
389941	complement C1q like 3	C1QL3	-0.361	0.144	0.305318	0.2466	-1.46191	3874.55
338761	complement C1q like 4	C1QL4	0.0521	0.785	0.869349	0.1904	0.273422	18.58
114897	C1q and TNF related 1	C1QTNF1	0.456	0.0264	0.122717	0.2054	2.22023	618.96
388581	C1q and TNF related 12	C1QTNF12	-0.0222	0.922	0.953997	0.2263	-0.0981174	40.68
114898	C1q and TNF related 2	C1QTNF2	-0.0378	0.727	0.831341	0.1082	-0.349432	90.63
114899	C1q and TNF related 3	C1QTNF3	0.147	0.261	0.440787	0.1308	1.12337	236.24
100534612	C1QTNF3-AMACR readthrough (NMD candidate)	C1QTNF3-AMACR	-0.0208	0.847	0.907506	0.1077	-0.193155	342.57
114900	C1q and TNF related 4	C1QTNF4	-0.162	0.269	0.448853	0.1462	-1.10616	1526.55
114902	C1q and TNF related 5	C1QTNF5	0.144	0.358	0.538454	0.1563	0.919044	126.18
114904	C1q and TNF related 6	C1QTNF6	0.0596	0.592	0.735831	0.1112	0.535947	251.97
114905	C1q and TNF related 7	C1QTNF7	-0.138	0.362	0.541823	0.152	-0.911412	47.99
390664	C1q and TNF related 8	C1QTNF8	0.433	0.0947	0.238977	0.2592	1.67109	24.24
387911	C1q and TNF related 9B	C1QTNF9B	0.497	0.0426	0.155171	0.2452	2.02722	15.87
715	complement C1r	C1R	0.592	0.00157	0.0308721	0.1873	3.1621	705.57
51279	complement C1r subcomponent like	C1RL	0.152	0.275	0.455425	0.1394	1.09134	314.76
283314	C1RL antisense RNA 1	C1RL-AS1	0.167	0.199	0.370232	0.1301	1.28582	72.39
716	complement C1s	C1S	0.188	0.116	0.268598	0.1195	1.57034	656.32
717	complement C2	C2	-0.0236	0.832	0.897381	0.1111	-0.212474	120.14
140873	chromosome 20 open reading frame 173	C20orf173	0.552	0.0348	0.140544	0.2617	2.11015	13.26
400831	chromosome 20 open reading frame 202	C20orf202	0.0449	0.74	0.839768	0.1351	0.332433	17.79
284805	chromosome 20 open reading frame 203	C20orf203	0.367	0.0212	0.110042	0.1594	2.30458	169.2
284739	chromosome 20 open reading frame 204	C20orf204	0.215	0.078	0.21495	0.1218	1.76252	82.29
54976	chromosome 20 open reading frame 27	C20orf27	-0.0539	0.572	0.721415	0.0955	-0.564465	1799.39
140680	chromosome 20 open reading frame 96	C20orf96	0.0794	0.278	0.458597	0.0731	1.08537	299.98
101928147	chromosome 21 open reading frame 140	C21orf140	-0.233	0.0997	0.246154	0.1415	-1.64612	61.3
54058	chromosome 21 open reading frame 58	C21orf58	0.13	0.115	0.26711	0.0822	1.57523	212.3
56245	chromosome 21 open reading frame 62	C21orf62	0.137	0.266	0.446159	0.1237	1.11156	62.35
54067	C21orf62 antisense RNA 1	C21orf62-AS1	0.514	0.00198	0.0341865	0.1662	3.09351	32.82
54149	chromosome 21 open reading frame 91	C21orf91	-0.152	0.508	0.671166	0.2291	-0.661882	669.44
150248	chromosome 22 open reading frame 15	C22orf15	0.311	0.00575	0.0589113	0.1125	2.7617	81.41
84645	chromosome 22 open reading frame 23	C22orf23	0.179	0.116	0.268063	0.1141	1.57239	484.44
25770	chromosome 22 open reading frame 31	C22orf31	0.579	0.0113	0.0823919	0.2286	2.53315	13.18
128977	chromosome 22 open reading frame 39	C22orf39	-0.062	0.377	0.556196	0.0702	-0.883395	1784.58
79640	CTA-216E10.6	C22orf46P	0.341	0.0111	0.0815402	0.1342	2.54074	1619.62
25966	C2 calcium dependent domain containing 2	C2CD2	0.0463	0.525	0.684135	0.0728	0.636123	1669.27
9854	C2CD2 like	C2CD2L	-0.272	0.0342	0.139267	0.1282	-2.11823	6035.7
26005	C2 domain containing 3 centriole elongation regulator	C2CD3	-0.0158	0.816	0.888287	0.0678	-0.232673	1466.13
145741	C2 calcium dependent domain containing 4A	C2CD4A	-0.222	0.233	0.411263	0.1858	-1.19251	15.29
388125	C2 calcium dependent domain containing 4B	C2CD4B	0.956	0.00807	0.0693037	0.361	2.64896	23.26
126567	C2 calcium dependent domain containing 4C	C2CD4C	-0.00239	0.988	0.993029	0.1572	-0.015214	3612.16
100191040	C2 calcium dependent domain containing 4D	C2CD4D	-0.17	0.139	0.299319	0.1152	-1.47936	70.43
100132111	C2CD4D and THEM5 antisense RNA 1	C2CD4D-AS1	-0.231	0.0348	0.14036	0.1095	-2.11091	470.33
9847	C2 calcium dependent domain containing 5	C2CD5	-0.243	0.0215	0.110749	0.1056	-2.29952	1762.26
105369692	C2CD5 antisense RNA 1	C2CD5-AS1	0.358	0.0829	0.222883	0.2063	1.73411	8.68
151254	C2 calcium dependent domain containing 6	C2CD6	0.408	0.0093	0.0744422	0.1568	2.6007	59.71
150590	chromosome 2 open reading frame 15	C2orf15	0.272	0.000744	0.0205264	0.0808	3.37297	107.11
84226	chromosome 2 open reading frame 16	C2orf16	-0.279	0.0035	0.0457622	0.0955	-2.92012	65.33
29798	chromosome 2 open reading frame 27A	C2orf27A	-0.125	0.0898	0.232865	0.0734	-1.69654	312.6
54980	chromosome 2 open reading frame 42	C2orf42	-0.151	0.00521	0.0560175	0.054	-2.79347	434.9
79074	chromosome 2 open reading frame 49	C2orf49	0.016	0.806	0.882472	0.0652	0.245395	790.21
100506473	C2orf49 divergent transcript	C2orf49-DT	0.0698	0.305	0.4863	0.068	1.02543	188.37
130813	chromosome 2 open reading frame 50	C2orf50	-0.208	0.0542	0.175188	0.1081	-1.92537	471.46
401027	chromosome 2 open reading frame 66	C2orf66	0.124	0.545	0.700465	0.2052	0.604655	12.91
388969	chromosome 2 open reading frame 68	C2orf68	0.189	0.061	0.187203	0.1009	1.87316	428.4
205327	chromosome 2 open reading frame 69	C2orf69	-0.128	0.114	0.264903	0.0806	-1.5822	1195.52
257407	chromosome 2 open reading frame 72	C2orf72	0.14	0.122	0.276271	0.0904	1.54767	2663.51
129852	chromosome 2 open reading frame 73	C2orf73	0.181	0.176	0.34498	0.134	1.35191	27.23
339804	chromosome 2 open reading frame 74	C2orf74	0.0676	0.549	0.703174	0.1128	0.598928	424.29
105374758	C2orf74 antisense RNA 1	C2orf74-AS1	0.59	0.00615	0.0603433	0.2154	2.73948	15.05
339803	C2orf74 divergent transcript	C2orf74-DT	0.161	0.0579	0.181867	0.0849	1.89652	221.9
130355	chromosome 2 open reading frame 76	C2orf76	0.0951	0.197	0.368199	0.0736	1.29107	125.94
389073	chromosome 2 open reading frame 80	C2orf80	-0.124	0.258	0.437545	0.1095	-1.13083	589.02
388963	chromosome 2 open reading frame 81	C2orf81	0.00242	0.981	0.988558	0.0999	0.0241878	362.55
84281	chromosome 2 open reading frame 88	C2orf88	-0.00903	0.941	0.965635	0.1217	-0.0742072	272.9
728537	chromosome 2 open reading frame 92	C2orf92	0.236	0.0364	0.143834	0.1128	2.09256	137.64
718	complement C3	C3	-0.556	0.0579	0.181847	0.2931	-1.8968	1772.22
719	complement C3a receptor 1	C3AR1	-0.421	0.11	0.259751	0.2636	-1.5987	48.23
57415	chromosome 3 open reading frame 14	C3orf14	-0.0618	0.372	0.551166	0.0692	-0.892984	1289.42
51161	chromosome 3 open reading frame 18	C3orf18	-0.153	0.114	0.265643	0.097	-1.57993	1592.04
84077	chromosome 3 open reading frame 20	C3orf20	0.25	0.0941	0.238242	0.1494	1.6741	274.54
285315	chromosome 3 open reading frame 33	C3orf33	-0.0365	0.582	0.72871	0.0663	-0.550806	184.61
285237	chromosome 3 open reading frame 38	C3orf38	-0.122	0.133	0.291855	0.0815	-1.50156	363.93
132200	chromosome 3 open reading frame 49	C3orf49	-0.127	0.184	0.354548	0.0954	-1.32811	137.73
79669	chromosome 3 open reading frame 52	C3orf52	0.126	0.499	0.663502	0.1868	0.675764	37.53
375341	chromosome 3 open reading frame 62	C3orf62	0.385	0.000415	0.0153553	0.109	3.53048	318.83
285382	chromosome 3 open reading frame 70	C3orf70	0.0822	0.511	0.673374	0.1252	0.656738	1465.22
401097	chromosome 3 open reading frame 80	C3orf80	-0.31	0.0409	0.152251	0.1515	-2.04413	1234.34
102724231	long intergenic non-protein coding RNA 694	C3orf86P	0.694	0.00292	0.042182	0.2332	2.97614	15.58
720	complement C4A (Rodgers blood group)	C4A	0.493	0.0456	0.160108	0.2468	1.9988	1766.88
721	complement C4B (Chido blood group)	C4B	0.468	0.0609	0.186905	0.2495	1.87458	1746.13
722	complement component 4 binding protein alpha	C4BPA	0.478	0.0216	0.111192	0.2083	2.29672	17.95
55286	chromosome 4 open reading frame 19	C4orf19	0.27	0.196	0.367337	0.2085	1.29335	200.66
401152	chromosome 4 open reading frame 3	C4orf3	0.0486	0.508	0.671508	0.0735	0.661297	3073.29
132321	chromosome 4 open reading frame 33	C4orf33	-0.184	0.0259	0.121689	0.0826	-2.22818	317.88
132989	chromosome 4 open reading frame 36	C4orf36	-0.139	0.145	0.307016	0.0956	-1.45765	56.8
[truncated: 21,022 more rows]

## Sheet: AnCg Major Depression vs Contro
GeneID	Description	Symbol	log2FoldChange	pvalue	padj	lfcSE	stat	baseMean	up:31	down:133
1	alpha-1-B glycoprotein	A1BG	0.0263229	0.798815	0.955	0.1033	0.254881	214.03
503538	A1BG antisense RNA 1	A1BG-AS1	0.0643699	0.312013	0.763	0.0637	1.01101	333.66
2	alpha-2-macroglobulin	A2M	-0.0311967	0.823388	0.962	0.1398	-0.223189	7964.55
144571	A2M antisense RNA 1	A2M-AS1	0.0339245	0.719503	0.937	0.0945	0.359123	166.4
144568	alpha-2-macroglobulin like 1	A2ML1	-0.181015	0.208862	0.692	0.144	-1.2567	175.2
53947	alpha 1,4-galactosyltransferase (P blood group)	A4GALT	0.350853	0.041857	0.486	0.1724	2.03494	179.14
8086	aladin WD repeat nucleoporin	AAAS	0.0113304	0.857641	0.971	0.0632	0.179378	810.95
65985	acetoacetyl-CoA synthetase	AACS	0.132036	0.0592524	0.524	0.07	1.88632	3782.98
729522	acetoacetyl-CoA synthetase pseudogene 1	AACSP1	-0.0877524	0.523298	0.869	0.1375	-0.63827	13.51
51166	aminoadipate aminotransferase	AADAT	-0.0200942	0.729421	0.939	0.0581	-0.345896	348.88
79719	alpha and gamma adaptin binding protein	AAGAB	0.063991	0.361132	0.793	0.0701	0.91321	1504.83
22848	AP2 associated kinase 1	AAK1	0.0170979	0.80262	0.956	0.0684	0.249958	12756.4
28971	adipogenesis associated Mth938 domain containing	AAMDC	-0.102091	0.238652	0.717	0.0866	-1.17836	88.37
14	angio associated migratory cell protein	AAMP	0.0906818	0.0493316	0.506	0.0461	1.96571	3461.71
15	aralkylamine N-acetyltransferase	AANAT	0.258547	0.13563	0.62	0.1733	1.49226	51.42
25980	AAR2 splicing factor	AAR2	-0.00905609	0.869768	0.974	0.0552	-0.163954	654.6
441376	alanine and arginine rich domain containing protein	AARD	0.251227	0.0324025	0.461	0.1174	2.13941	61.26
16	alanyl-tRNA synthetase 1	AARS1	0.0432857	0.505537	0.862	0.065	0.665802	13766.1
57505	alanyl-tRNA synthetase 2, mitochondrial	AARS2	0.0312437	0.690627	0.927	0.0785	0.398004	1798.97
80755	alanyl-tRNA synthetase domain containing 1	AARSD1	0.133045	0.0038377	0.359	0.046	2.8912	502.4
132949	aminoadipate-semialdehyde dehydrogenase	AASDH	-0.142684	0.082954	0.559	0.0823	-1.7338	477.62
60496	aminoadipate-semialdehyde dehydrogenase-phosphopantetheinyl transferase	AASDHPPT	0.0118294	0.852341	0.97	0.0636	0.186133	3198.87
10157	aminoadipate-semialdehyde synthase	AASS	-0.276528	0.0324923	0.461	0.1293	-2.1383	518.43
284837	apoptosis associated transcript in bladder cancer	AATBC	-0.15527	0.321276	0.77	0.1565	-0.99184	133.41
26574	apoptosis antagonizing transcription factor	AATF	0.078533	0.250533	0.724	0.0683	1.14906	852.33
9625	apoptosis associated tyrosine kinase	AATK	-0.113761	0.506281	0.862	0.1712	-0.66464	24747.6
103021294	apoptotic BCL2L1-antisense long non-coding RNA	ABALON	0.0600439	0.347575	0.785	0.0639	0.939304	803.81
18	4-aminobutyrate aminotransferase	ABAT	-0.00706645	0.921562	0.985	0.0718	-0.0984661	13443.7
19	ATP binding cassette subfamily A member 1	ABCA1	-0.327225	0.0092139	0.398	0.1257	-2.60401	463.89
10349	ATP binding cassette subfamily A member 10	ABCA10	-0.0266525	0.813496	0.959	0.113	-0.235919	94.42
79963	ATP binding cassette subfamily A member 11, pseudogene	ABCA11P	-0.0116121	0.868607	0.973	0.0702	-0.165428	282.96
26154	ATP binding cassette subfamily A member 12	ABCA12	-0.0245098	0.889135	0.978	0.1758	-0.139399	20.63
650655	ATP binding cassette subfamily A member 17, pseudogene	ABCA17P	0.13232	0.271131	0.74	0.1202	1.10046	111.17
20	ATP binding cassette subfamily A member 2	ABCA2	-0.24432	0.141737	0.631	0.1663	-1.46935	69582.3
21	ATP binding cassette subfamily A member 3	ABCA3	0.0698704	0.340777	0.782	0.0733	0.952631	14586.9
24	ATP binding cassette subfamily A member 4	ABCA4	-0.0219876	0.826555	0.962	0.1003	-0.219122	39.11
23461	ATP binding cassette subfamily A member 5	ABCA5	-0.0869287	0.223648	0.706	0.0714	-1.21689	1297.33
23460	ATP binding cassette subfamily A member 6	ABCA6	-0.192061	0.199953	0.683	0.1499	-1.28168	231.13
10347	ATP binding cassette subfamily A member 7	ABCA7	0.0517913	0.613738	0.9	0.1026	0.504744	2116.26
10351	ATP binding cassette subfamily A member 8	ABCA8	-0.694726	0.004192	0.366	0.2426	-2.86334	939.23
10350	ATP binding cassette subfamily A member 9	ABCA9	-0.0823401	0.413163	0.819	0.1006	-0.81834	286.51
5243	ATP binding cassette subfamily B member 1	ABCB1	0.016367	0.87394	0.975	0.1032	0.158656	942.83
23456	ATP binding cassette subfamily B member 10	ABCB10	-0.0865322	0.0688123	0.538	0.0476	-1.81965	435.11
8647	ATP binding cassette subfamily B member 11	ABCB11	-0.132672	0.533875	0.872	0.2133	-0.622101	10.96
5244	ATP binding cassette subfamily B member 4	ABCB4	0.171324	0.0364007	0.475	0.0819	2.09242	95.51
10058	ATP binding cassette subfamily B member 6 (Langereis blood group)	ABCB6	0.0800639	0.125638	0.614	0.0523	1.53153	1905.07
22	ATP binding cassette subfamily B member 7	ABCB7	-0.0381052	0.550587	0.878	0.0638	-0.596881	402.47
11194	ATP binding cassette subfamily B member 8	ABCB8	0.020977	0.722306	0.938	0.059	0.355378	2380.43
23457	ATP binding cassette subfamily B member 9	ABCB9	0.0452478	0.443189	0.835	0.059	0.766819	2270.93
4363	ATP binding cassette subfamily C member 1	ABCC1	-0.0343995	0.578645	0.889	0.0619	-0.555365	966.28
89845	ATP binding cassette subfamily C member 10	ABCC10	0.0204773	0.760509	0.948	0.0672	0.304812	1511.28
85320	ATP binding cassette subfamily C member 11	ABCC11	-0.0868654	0.247453	0.722	0.0751	-1.15656	96.48
94160	ATP binding cassette subfamily C member 12	ABCC12	0.0296898	0.835562	0.965	0.143	0.207573	151.84
1244	ATP binding cassette subfamily C member 2	ABCC2	-0.0601404	0.736504	0.942	0.1787	-0.336486	15.32
8714	ATP binding cassette subfamily C member 3	ABCC3	-0.060082	0.688492	0.926	0.1499	-0.400903	54.53
10257	ATP binding cassette subfamily C member 4	ABCC4	-0.183118	0.129821	0.616	0.1209	-1.51481	120.45
10057	ATP binding cassette subfamily C member 5	ABCC5	0.0356825	0.574562	0.888	0.0636	0.561346	3759.39
368	ATP binding cassette subfamily C member 6	ABCC6	0.430695	0.0003057	0.286	0.1193	3.61045	82.5
653190	ATP binding cassette subfamily C member 6 pseudogene 1	ABCC6P1	0.124091	0.406926	0.816	0.1496	0.829315	16.46
6833	ATP binding cassette subfamily C member 8	ABCC8	0.12814	0.129472	0.616	0.0845	1.51619	3313.02
10060	ATP binding cassette subfamily C member 9	ABCC9	-0.223663	0.136517	0.621	0.1502	-1.48889	585.84
215	ATP binding cassette subfamily D member 1	ABCD1	0.0389883	0.754818	0.947	0.1248	0.312292	449.97
225	ATP binding cassette subfamily D member 2	ABCD2	-0.0870993	0.374352	0.799	0.098	-0.88835	656.13
5825	ATP binding cassette subfamily D member 3	ABCD3	-0.127586	0.0567469	0.519	0.067	-1.90526	1115.64
5826	ATP binding cassette subfamily D member 4	ABCD4	-0.0336911	0.742519	0.943	0.1026	-0.328519	812.01
6059	ATP binding cassette subfamily E member 1	ABCE1	-0.0744767	0.199588	0.683	0.0581	-1.28273	1214.54
23	ATP binding cassette subfamily F member 1	ABCF1	0.0383922	0.467988	0.843	0.0529	0.725757	3230.3
107986587	ABCF1 divergent transcript	ABCF1-DT	0.0982012	0.490573	0.853	0.1424	0.689397	13.59
10061	ATP binding cassette subfamily F member 2	ABCF2	0.0768314	0.144264	0.634	0.0526	1.46009	1734.85
114483834	ABCF2-H2BK1 readthrough	ABCF2-H2BK1	0.0348765	0.563496	0.884	0.0604	0.577656	979.61
55324	ATP binding cassette subfamily F member 3	ABCF3	0.0345727	0.516149	0.866	0.0532	0.649293	2262.77
9619	ATP binding cassette subfamily G member 1	ABCG1	-0.117102	0.13364	0.618	0.0781	-1.4999	2177.98
9429	ATP binding cassette subfamily G member 2 (Junior blood group)	ABCG2	0.00656859	0.970123	0.994	0.1754	0.0374539	1350.41
64137	ATP binding cassette subfamily G member 4	ABCG4	0.0814039	0.301775	0.758	0.0788	1.03263	2064.11
64240	ATP binding cassette subfamily G member 5	ABCG5	0.066355	0.52627	0.869	0.1047	0.63371	38.55
64241	ATP binding cassette subfamily G member 8	ABCG8	0.0560572	0.483246	0.85	0.08	0.701091	122.81
84696	abhydrolase domain containing 1	ABHD1	0.0579212	0.34255	0.783	0.061	0.94914	146.22
55347	abhydrolase domain containing 10, depalmitoylase	ABHD10	0.0134258	0.812154	0.958	0.0565	0.237649	1125.45
83451	abhydrolase domain containing 11	ABHD11	0.0596242	0.463413	0.842	0.0813	0.733239	398.74
26090	abhydrolase domain containing 12, lysophospholipase	ABHD12	0.102045	0.0396391	0.481	0.0496	2.05749	5842.04
145447	abhydrolase domain containing 12B	ABHD12B	0.157062	0.0472113	0.502	0.0791	1.9844	225.83
84945	abhydrolase domain containing 13	ABHD13	-0.0161736	0.82758	0.963	0.0743	-0.217807	548.37
25864	abhydrolase domain containing 14A	ABHD14A	0.198621	0.001074	0.313	0.0607	3.27039	1206.02
100526760	ABHD14A-ACY1 readthrough	ABHD14A-ACY1	0.110968	0.0244073	0.445	0.0493	2.25066	583.53
84836	abhydrolase domain containing 14B	ABHD14B	0.0719645	0.33097	0.775	0.074	0.972162	513.66
116236	abhydrolase domain containing 15	ABHD15	-0.143234	0.174422	0.662	0.1055	-1.35813	178.07
7920	abhydrolase domain containing 16A, phospholipase	ABHD16A	0.0764184	0.215382	0.697	0.0617	1.2389	2176.9
140701	abhydrolase domain containing 16B	ABHD16B	0.0834994	0.569087	0.886	0.1466	0.569397	385.04
81926	abhydrolase domain containing 17A, depalmitoylase	ABHD17A	0.124708	0.36226	0.793	0.1369	0.911066	7197.38
51104	abhydrolase domain containing 17B, depalmitoylase	ABHD17B	-0.162998	0.0914995	0.571	0.0966	-1.68754	968.23
58489	abhydrolase domain containing 17C, depalmitoylase	ABHD17C	0.0759612	0.24413	0.72	0.0652	1.16473	811.94
80167	abhydrolase domain containing 18	ABHD18	-0.0663755	0.289415	0.75	0.0627	-1.05941	482.37
11057	abhydrolase domain containing 2, acylglycerol lipase	ABHD2	-0.086672	0.291787	0.75	0.0822	-1.05421	3799.88
171586	abhydrolase domain containing 3, phospholipase	ABHD3	-0.142764	0.124664	0.612	0.093	-1.53549	225.35
63874	abhydrolase domain containing 4, N-acyl phospholipase B	ABHD4	0.0246661	0.841711	0.967	0.1235	0.199706	966.51
51099	abhydrolase domain containing 5, lysophosphatidic acid acyltransferase	ABHD5	-0.13551	0.120397	0.604	0.0873	-1.55311	630.34
57406	abhydrolase domain containing 6, acylglycerol lipase	ABHD6	0.00953344	0.906569	0.982	0.0812	0.117367	1769.21
79575	abhydrolase domain containing 8	ABHD8	0.158224	0.103545	0.585	0.0972	1.6279	5884.26
10006	abl interactor 1	ABI1	-0.00890196	0.897171	0.98	0.0689	-0.129236	2576.56
10152	abl interactor 2	ABI2	0.00116441	0.985849	0.997	0.0656	0.0177369	15508.8
51225	ABI family member 3	ABI3	0.0968212	0.572095	0.886	0.1714	0.564969	107.88
25890	ABI family member 3 binding protein	ABI3BP	-0.212567	0.105154	0.588	0.1312	-1.62036	144.25
54942	actin binding transcription modulator	ABITRAM	0.100087	0.0442991	0.491	0.0498	2.01125	632.78
25	ABL proto-oncogene 1, non-receptor tyrosine kinase	ABL1	-0.118321	0.231677	0.711	0.0989	-1.19605	3529.37
27	ABL proto-oncogene 2, non-receptor tyrosine kinase	ABL2	-0.0263206	0.65448	0.914	0.0588	-0.447547	2939.46
3983	actin binding LIM protein 1	ABLIM1	-0.0426884	0.54105	0.874	0.0698	-0.611226	8248.8
84448	actin binding LIM protein family member 2	ABLIM2	0.0153537	0.844253	0.968	0.0782	0.196456	5734.54
22885	actin binding LIM protein family member 3	ABLIM3	0.0647159	0.364687	0.794	0.0714	0.906469	2984.4
28	ABO, alpha 1-3-N-acetylgalactosaminyltransferase and alpha 1-3-galactosyltransferase	ABO	0.184437	0.351148	0.788	0.1978	0.932365	205.76
29	ABR activator of RhoGEF and GTPase	ABR	0.104166	0.118214	0.604	0.0667	1.56232	42727.3
137735	actin binding Rho activating protein	ABRA	-0.258434	0.0933705	0.571	0.154	-1.67788	20.82
58527	ABRA C-terminal like	ABRACL	0.064869	0.490486	0.853	0.0941	0.689537	161.92
105371479	ABR antisense RNA 1	ABR-AS1	0.0265876	0.817805	0.96	0.1154	0.230369	52.33
84142	abraxas 1, BRCA1 A complex subunit	ABRAXAS1	0.081545	0.0782152	0.555	0.0463	1.76114	231.25
23172	abraxas 2, BRISC complex subunit	ABRAXAS2	0.00945167	0.862587	0.972	0.0546	0.173081	531.32
29777	activator of basal transcription 1	ABT1	0.0637577	0.161908	0.65	0.0456	1.39868	324.09
80325	ankyrin repeat and BTB domain containing 1	ABTB1	0.0845598	0.310015	0.762	0.0833	1.01519	4700.86
25841	ankyrin repeat and BTB domain containing 2	ABTB2	-0.38224	0.0219727	0.435	0.1669	-2.29084	718.62
121551	ankyrin repeat and BTB domain containing 3	ABTB3	-0.044651	0.678715	0.923	0.1078	-0.414217	1120.97
30	acetyl-CoA acyltransferase 1	ACAA1	0.0390802	0.45948	0.84	0.0528	0.739703	1413.02
10449	acetyl-CoA acyltransferase 2	ACAA2	-0.0609877	0.605268	0.897	0.118	-0.516839	655.71
31	acetyl-CoA carboxylase alpha	ACACA	0.0132121	0.841492	0.967	0.0661	0.199985	7272.63
32	acetyl-CoA carboxylase beta	ACACB	-0.332571	0.0108094	0.414	0.1305	-2.5488	1240.22
80724	acyl-CoA dehydrogenase family member 10	ACAD10	0.00392063	0.920981	0.985	0.0395	0.0991981	630.86
84129	acyl-CoA dehydrogenase family member 11	ACAD11	-0.169016	0.0747005	0.551	0.0948	-1.7823	236.02
27034	acyl-CoA dehydrogenase family member 8	ACAD8	0.049309	0.222964	0.705	0.0405	1.21868	1429.06
28976	acyl-CoA dehydrogenase family member 9	ACAD9	0.0406403	0.221874	0.704	0.0333	1.22156	1200.73
33	acyl-CoA dehydrogenase long chain	ACADL	-0.0656442	0.562434	0.883	0.1133	-0.57923	59.03
34	acyl-CoA dehydrogenase medium chain	ACADM	-0.0272658	0.620514	0.903	0.0551	-0.495123	940.04
35	acyl-CoA dehydrogenase short chain	ACADS	0.0473873	0.680966	0.924	0.1153	0.411145	429.64
36	acyl-CoA dehydrogenase short/branched chain	ACADSB	-0.00735656	0.913048	0.984	0.0674	-0.109194	1360.25
37	acyl-CoA dehydrogenase very long chain	ACADVL	0.0411404	0.596334	0.895	0.0777	0.52968	6215.8
176	aggrecan	ACAN	-0.204629	0.242033	0.719	0.1749	-1.16992	154.56
9744	ArfGAP with coiled-coil, ankyrin repeat and PH domains 1	ACAP1	0.0428349	0.690082	0.927	0.1074	0.398744	325.8
23527	ArfGAP with coiled-coil, ankyrin repeat and PH domains 2	ACAP2	-0.19738	0.0089495	0.395	0.0755	-2.61398	951.68
116983	ArfGAP with coiled-coil, ankyrin repeat and PH domains 3	ACAP3	0.0268092	0.801724	0.956	0.1068	0.251117	21878
38	acetyl-CoA acetyltransferase 1	ACAT1	0.0161173	0.728607	0.939	0.0465	0.346979	1020.76
39	acetyl-CoA acetyltransferase 2	ACAT2	0.118009	0.0430347	0.489	0.0583	2.02337	1675.22
64746	acyl-CoA binding domain containing 3	ACBD3	-0.027866	0.647487	0.912	0.0609	-0.457256	1336.38
107985353	ACBD3 antisense RNA 1	ACBD3-AS1	-0.0679912	0.436303	0.833	0.0873	-0.778451	131.26
79777	acyl-CoA binding domain containing 4	ACBD4	0.0566311	0.494884	0.856	0.083	0.682562	929.16
91452	acyl-CoA binding domain containing 5	ACBD5	-0.0226438	0.682483	0.924	0.0554	-0.409077	2384.72
84320	acyl-CoA binding domain containing 6	ACBD6	0.0494433	0.13647	0.621	0.0332	1.48907	711.39
414149	acyl-CoA binding domain containing 7	ACBD7	-0.0180484	0.903506	0.981	0.1489	-0.121233	2419.62
108949267	ACBD7-DCLRE1CP1 readthrough	ACBD7-DCLRE1CP1	-0.153493	0.35194	0.788	0.1649	-0.930833	53.29
84680	1-aminocyclopropane-1-carboxylate synthase homolog (inactive)	ACCS	-0.198284	0.168347	0.657	0.1439	-1.37753	200.65
65057	ACD shelterin complex subunit and telomerase recruitment factor	ACD	0.140833	0.0628378	0.53	0.0757	1.86034	1381.62
1636	angiotensin I converting enzyme	ACE	0.138327	0.126001	0.615	0.0904	1.53006	662.21
340485	alkaline ceramidase 2	ACER2	0.0101586	0.940185	0.99	0.1354	0.0750373	275.56
55331	alkaline ceramidase 3	ACER3	-0.0730106	0.388678	0.806	0.0847	-0.862017	2459.73
43	acetylcholinesterase (Cartwright blood group)	ACHE	0.164566	0.110881	0.596	0.1032	1.59425	3611.29
22985	apoptotic chromatin condensation inducer 1	ACIN1	-0.0258211	0.537945	0.873	0.0419	-0.615923	4059.54
2532	atypical chemokine receptor 1 (Duffy blood group)	ACKR1	0.195065	0.0568685	0.519	0.1024	1.90432	542.87
1238	atypical chemokine receptor 2	ACKR2	-0.370248	0.0110628	0.415	0.1457	-2.54071	23.99
57007	atypical chemokine receptor 3	ACKR3	-0.388344	0.0080056	0.391	0.1464	-2.65183	194.33
51554	atypical chemokine receptor 4	ACKR4	-0.185766	0.229571	0.71	0.1546	-1.20147	12.06
47	ATP citrate lyase	ACLY	0.00637959	0.928496	0.987	0.0711	0.0897367	5941.25
130013	aminocarboxymuconate semialdehyde decarboxylase	ACMSD	-0.165787	0.180756	0.668	0.1239	-1.33843	26.08
48	aconitase 1	ACO1	-0.0769616	0.306487	0.761	0.0753	-1.02262	1039.23
50	aconitase 2	ACO2	0.121355	0.0964382	0.573	0.073	1.66237	15083.2
641371	acyl-CoA thioesterase 1	ACOT1	0.123742	0.163309	0.652	0.0888	1.39403	392.67
26027	acyl-CoA thioesterase 11	ACOT11	-0.217764	0.0662728	0.534	0.1186	-1.83657	679.27
134526	acyl-CoA thioesterase 12	ACOT12	0.0536466	0.700907	0.931	0.1397	0.384097	19.43
55856	acyl-CoA thioesterase 13	ACOT13	0.0158981	0.694981	0.928	0.0405	0.392105	692.11
10965	acyl-CoA thioesterase 2	ACOT2	0.0912732	0.236791	0.715	0.0772	1.18305	542.45
122970	acyl-CoA thioesterase 4	ACOT4	0.128649	0.116049	0.604	0.0819	1.57158	184.45
641372	acyl-CoA thioesterase 6	ACOT6	0.0497104	0.682104	0.924	0.1214	0.409594	66.77
11332	acyl-CoA thioesterase 7	ACOT7	0.178629	0.0131062	0.417	0.072	2.48087	7727.58
10005	acyl-CoA thioesterase 8	ACOT8	0.126241	0.0231722	0.439	0.0556	2.27058	1204.9
23597	acyl-CoA thioesterase 9	ACOT9	0.113294	0.0098183	0.402	0.0439	2.58216	859.99
51	acyl-CoA oxidase 1	ACOX1	-0.146392	0.0566098	0.519	0.0768	-1.90631	1891.69
8309	acyl-CoA oxidase 2	ACOX2	-0.258593	0.0530336	0.514	0.1337	-1.93465	102.13
8310	acyl-CoA oxidase 3, pristanoyl	ACOX3	-0.0993522	0.0416006	0.485	0.0488	-2.03749	623.77
55289	acyl-CoA oxidase like	ACOXL	0.0908474	0.443832	0.836	0.1186	0.765739	156.56
400997	ACOXL antisense RNA 1	ACOXL-AS1	-0.0615742	0.708833	0.933	0.1649	-0.373424	10.16
52	acid phosphatase 1	ACP1	0.0957005	0.0602178	0.525	0.0509	1.8792	2082.49
53	acid phosphatase 2, lysosomal	ACP2	0.0908545	0.116255	0.604	0.0578	1.57069	2381
93650	acid phosphatase 4	ACP4	0.0926599	0.511644	0.864	0.1412	0.65628	26.27
54	acid phosphatase 5, tartrate resistant	ACP5	-0.138939	0.328636	0.773	0.1422	-0.976865	32.85
51205	acid phosphatase 6, lysophosphatidic	ACP6	-0.148225	0.176076	0.664	0.1096	-1.35294	303.44
390928	acid phosphatase 7, tartrate resistant (putative)	ACP7	-0.332756	0.155469	0.644	0.2343	-1.42048	115.07
49	acrosin	ACR	0.188323	0.161443	0.65	0.1345	1.40024	27.72
84519	acrosin binding protein	ACRBP	0.013448	0.932454	0.988	0.1587	0.0847572	19.71
56	acrosomal vesicle protein 1	ACRV1	0.339151	0.0005	0.286	0.0974	3.48073	42.84
23205	acyl-CoA synthetase bubblegum family member 1	ACSBG1	-0.119703	0.214473	0.696	0.0964	-1.24136	3112.41
81616	acyl-CoA synthetase bubblegum family member 2	ACSBG2	-0.0187057	0.891902	0.979	0.1376	-0.135898	22.5
80221	acyl-CoA synthetase family member 2	ACSF2	-0.038108	0.761294	0.948	0.1254	-0.303782	289.83
197322	acyl-CoA synthetase family member 3	ACSF3	-0.0147505	0.838802	0.966	0.0725	-0.203426	965.64
2180	acyl-CoA synthetase long chain family member 1	ACSL1	-0.119614	0.272101	0.74	0.1089	-1.09824	1566.29
2181	acyl-CoA synthetase long chain family member 3	ACSL3	-0.025115	0.693593	0.928	0.0637	-0.393983	5800.27
2182	acyl-CoA synthetase long chain family member 4	ACSL4	0.0341974	0.714624	0.935	0.0935	0.365653	3877
51703	acyl-CoA synthetase long chain family member 5	ACSL5	0.31158	0.0870673	0.564	0.1821	1.71107	334.32
23305	acyl-CoA synthetase long chain family member 6	ACSL6	-0.103007	0.219874	0.702	0.084	-1.22686	5201.76
101927693	ACSL6 antisense RNA 1	ACSL6-AS1	-0.00478905	0.971345	0.994	0.1333	-0.035922	27.23
6296	acyl-CoA synthetase medium chain family member 3	ACSM3	-0.212293	0.0106731	0.412	0.0831	-2.55322	48.19
54988	acyl-CoA synthetase medium chain family member 5	ACSM5	-0.00764876	0.963834	0.993	0.1687	-0.0453425	77.27
84532	acyl-CoA synthetase short chain family member 1	ACSS1	-0.183668	0.23922	0.717	0.1561	-1.17694	2568.28
55902	acyl-CoA synthetase short chain family member 2	ACSS2	-0.00832038	0.918306	0.985	0.0811	-0.102568	1674.79
79611	acyl-CoA synthetase short chain family member 3	ACSS3	0.0167208	0.786767	0.954	0.0618	0.270511	1493.43
58	actin alpha 1, skeletal muscle	ACTA1	0.179691	0.0577349	0.521	0.0947	1.89771	87.43
59	actin alpha 2, smooth muscle	ACTA2	-0.295964	0.282744	0.747	0.2755	-1.07418	1376.75
100132116	ACTA2 antisense RNA 1	ACTA2-AS1	-0.287477	0.272797	0.74	0.2621	-1.09664	497.28
60	actin beta	ACTB	0.0280799	0.563107	0.884	0.0486	0.578232	82340.4
70	actin alpha cardiac muscle 1	ACTC1	0.0376775	0.781778	0.953	0.136	0.277002	105.72
71	actin gamma 1	ACTG1	0.0755355	0.168742	0.657	0.0549	1.37626	53388
283693	actin gamma 1 pseudogene 17	ACTG1P17	-0.0248253	0.832626	0.964	0.1175	-0.211335	23.94
644961	actin gamma 1 pseudogene 20	ACTG1P20	0.186118	0.232812	0.712	0.156	1.19315	107.93
148709	actin gamma 1 pseudogene 25	ACTG1P25	0.0915495	0.424429	0.825	0.1146	0.79876	41.08
648740	actin gamma 1 pseudogene 4	ACTG1P4	-0.218073	0.126365	0.615	0.1427	-1.5286	69.33
72	actin gamma 2, smooth muscle	ACTG2	-0.615602	0.0666162	0.535	0.3356	-1.83425	90.4
170487	actin like 10	ACTL10	-0.287162	0.162165	0.65	0.2054	-1.39783	23.32
86	actin like 6A	ACTL6A	-0.0956209	0.328759	0.773	0.0979	-0.976615	186.39
51412	actin like 6B	ACTL6B	0.115772	0.0615069	0.528	0.0619	1.86983	3218.34
284325	actin maturation protease	ACTMAP	-0.119762	0.216622	0.699	0.0969	-1.23556	302.67
87	actinin alpha 1	ACTN1	0.0598289	0.310721	0.762	0.059	1.01371	7145.64
88	actinin alpha 2	ACTN2	0.0598105	0.27837	0.744	0.0552	1.08399	3044.37
89	actinin alpha 3	ACTN3	0.137243	0.294025	0.752	0.1308	1.04933	17.66
81	actinin alpha 4	ACTN4	-0.0525276	0.465762	0.842	0.072	-0.729392	11611.9
55860	actin related protein 10	ACTR10	0.0800058	0.245392	0.721	0.0689	1.16161	2217.87
10121	actin related protein 1A	ACTR1A	0.0725343	0.188688	0.675	0.0552	1.31447	6989.77
10120	actin related protein 1B	ACTR1B	0.128302	0.0445784	0.493	0.0639	2.00861	6380.53
10097	actin related protein 2	ACTR2	-0.0219815	0.728231	0.939	0.0633	-0.347479	9555.55
10096	actin related protein 3	ACTR3	0.00849416	0.871943	0.975	0.0527	0.161191	3627.46
101060091	ACTR3 antisense RNA 1	ACTR3-AS1	0.0778575	0.577079	0.889	0.1396	0.557657	31.58
57180	actin related protein 3B	ACTR3B	0.100096	0.170879	0.657	0.0731	1.36938	2370.59
653857	actin related protein 3C	ACTR3C	0.0495359	0.354475	0.789	0.0535	0.925945	1500.19
79913	actin related protein 5	ACTR5	0.00686845	0.899769	0.98	0.0545	0.125953	264.3
64431	actin related protein 6	ACTR6	-0.0226204	0.6435	0.911	0.0489	-0.462811	675.09
93973	actin related protein 8	ACTR8	0.0514953	0.414002	0.82	0.063	0.816872	1501.97
84517	actin related protein T3	ACTRT3	0.1322	0.288131	0.75	0.1245	1.06223	72.92
90	activin A receptor type 1	ACVR1	0.0603683	0.333268	0.776	0.0624	0.967553	722.34
91	activin A receptor type 1B	ACVR1B	0.122288	0.0297481	0.46	0.0563	2.17343	4986.88
130399	activin A receptor type 1C	ACVR1C	-0.117714	0.421556	0.824	0.1465	-0.803725	598.77
92	activin A receptor type 2A	ACVR2A	-0.067749	0.333476	0.776	0.0701	-0.967135	778.97
93	activin A receptor type 2B	ACVR2B	-0.0832354	0.153555	0.643	0.0583	-1.42709	887.11
100128640	ACVR2B antisense RNA 1	ACVR2B-AS1	0.190097	0.0511775	0.509	0.0975	1.94999	41.92
94	activin A receptor like type 1	ACVRL1	0.21265	0.0889036	0.567	0.125	1.70121	703.95
95	aminoacylase 1	ACY1	-0.0239625	0.746972	0.945	0.0743	-0.322634	159.7
91703	aminoacylase 3	ACY3	0.0271063	0.92253	0.985	0.2787	0.0972471	102.35
97	acylphosphatase 1	ACYP1	0.0947787	0.273707	0.741	0.0866	1.09457	222.35
98	acylphosphatase 2	ACYP2	0.0945233	0.147447	0.637	0.0653	1.44861	910.38
100	adenosine deaminase	ADA	-0.0710174	0.737673	0.942	0.212	-0.334936	199.43
51816	adenosine deaminase 2	ADA2	-0.0243595	0.843397	0.967	0.1233	-0.19755	566.71
161931	adenosine deaminase domain containing 2	ADAD2	0.152288	0.41028	0.817	0.1849	0.823401	170.17
161823	adenosine deaminase like	ADAL	0.0276523	0.700497	0.931	0.0719	0.38465	440.03
102	ADAM metallopeptidase domain 10	ADAM10	-0.107871	0.159017	0.647	0.0766	-1.40838	2332.75
4185	ADAM metallopeptidase domain 11	ADAM11	0.0971884	0.265026	0.735	0.0872	1.11459	11146.4
8038	ADAM metallopeptidase domain 12	ADAM12	-0.0828629	0.407534	0.816	0.1	-0.828242	98.65
8751	ADAM metallopeptidase domain 15	ADAM15	-0.00973216	0.913804	0.984	0.0899	-0.108242	3071.9
6868	ADAM metallopeptidase domain 17	ADAM17	-0.0941273	0.0906725	0.569	0.0556	-1.69186	606.12
8728	ADAM metallopeptidase domain 19	ADAM19	-0.0332283	0.728526	0.939	0.0957	-0.347087	798.06
8748	ADAM metallopeptidase domain 20	ADAM20	-0.0649548	0.553181	0.879	0.1095	-0.593	179.03
317760	ADAM metallopeptidase domain 20 pseudogene 1	ADAM20P1	0.0391008	0.734803	0.941	0.1154	0.338743	46.14
8747	ADAM metallopeptidase domain 21	ADAM21	-0.0900825	0.418372	0.822	0.1113	-0.809248	34.22
53616	ADAM metallopeptidase domain 22	ADAM22	-0.00169587	0.987395	0.997	0.1073	-0.0157982	5113.33
8745	ADAM metallopeptidase domain 23	ADAM23	0.10542	0.263618	0.734	0.0943	1.11788	5353.1
10863	ADAM metallopeptidase domain 28	ADAM28	-0.168516	0.389412	0.806	0.1958	-0.860684	131.08
203102	ADAM metallopeptidase domain 32	ADAM32	-0.0200646	0.869962	0.974	0.1226	-0.163707	34.17
80332	ADAM metallopeptidase domain 33	ADAM33	-0.0437247	0.781245	0.953	0.1575	-0.277697	597.91
101929294	ADAM7, ADAMDEC1 and ADAM28 antisense RNA 1	ADAM7-AS1	0.0808744	0.672733	0.922	0.1915	0.4224	12.76
101	ADAM metallopeptidase domain 8	ADAM8	-0.0109585	0.937225	0.989	0.1391	-0.0787585	170.18
8754	ADAM metallopeptidase domain 9	ADAM9	-0.0837605	0.246632	0.722	0.0723	-1.15857	1375.78
9510	ADAM metallopeptidase with thrombospondin type 1 motif 1	ADAMTS1	-0.139676	0.539158	0.873	0.2275	-0.614086	1117.77
81794	ADAM metallopeptidase with thrombospondin type 1 motif 10	ADAMTS10	0.0393785	0.722779	0.938	0.111	0.354747	2722.76
81792	ADAM metallopeptidase with thrombospondin type 1 motif 12	ADAMTS12	-0.277343	0.137269	0.622	0.1866	-1.48604	14.03
11093	ADAM metallopeptidase with thrombospondin type 1 motif 13	ADAMTS13	-0.00788475	0.94556	0.99	0.1155	-0.0682831	1438.35
140766	ADAM metallopeptidase with thrombospondin type 1 motif 14	ADAMTS14	-0.470622	0.10347	0.585	0.289	-1.62826	332.92
170689	ADAM metallopeptidase with thrombospondin type 1 motif 15	ADAMTS15	-0.101817	0.493425	0.855	0.1487	-0.684871	98.36
170690	ADAM metallopeptidase with thrombospondin type 1 motif 16	ADAMTS16	0.103138	0.400129	0.811	0.1226	0.841391	313.23
101929176	ADAMTS16 divergent transcript	ADAMTS16-DT	0.189777	0.186268	0.673	0.1436	1.3217	76.63
170691	ADAM metallopeptidase with thrombospondin type 1 motif 17	ADAMTS17	-0.182146	0.0615508	0.528	0.0974	-1.86952	224.34
170692	ADAM metallopeptidase with thrombospondin type 1 motif 18	ADAMTS18	-0.400136	0.331259	0.775	0.4118	-0.971582	88.97
171019	ADAM metallopeptidase with thrombospondin type 1 motif 19	ADAMTS19	-0.077331	0.378279	0.801	0.0878	-0.881071	167.78
103689846	ADAMTS19 antisense RNA 1	ADAMTS19-AS1	-0.0851191	0.534253	0.872	0.137	-0.621526	20.44
9509	ADAM metallopeptidase with thrombospondin type 1 motif 2	ADAMTS2	0.293821	0.0086856	0.393	0.112	2.62419	519.06
9508	ADAM metallopeptidase with thrombospondin type 1 motif 3	ADAMTS3	-0.151165	0.203999	0.686	0.119	-1.27024	318.09
9507	ADAM metallopeptidase with thrombospondin type 1 motif 4	ADAMTS4	-0.205858	0.466004	0.842	0.2824	-0.728996	2152.51
11096	ADAM metallopeptidase with thrombospondin type 1 motif 5	ADAMTS5	-0.055847	0.678016	0.923	0.1345	-0.415172	109.09
11174	ADAM metallopeptidase with thrombospondin type 1 motif 6	ADAMTS6	-0.00822351	0.949408	0.991	0.1296	-0.0634507	53.65
11173	ADAM metallopeptidase with thrombospondin type 1 motif 7	ADAMTS7	-0.0273702	0.873535	0.975	0.172	-0.15917	196.23
390660	ADAMTS7 pseudogene 1	ADAMTS7P1	-0.0692077	0.606243	0.898	0.1343	-0.515444	333.61
11095	ADAM metallopeptidase with thrombospondin type 1 motif 8	ADAMTS8	-0.0301573	0.802346	0.956	0.1205	-0.250313	1370.66
56999	ADAM metallopeptidase with thrombospondin type 1 motif 9	ADAMTS9	0.271673	0.160631	0.649	0.1936	1.40295	227.05
101929335	ADAMTS9 antisense RNA 1	ADAMTS9-AS1	0.277929	0.208886	0.692	0.2212	1.25663	73.47
100507098	ADAMTS9 antisense RNA 2	ADAMTS9-AS2	-0.0334493	0.798175	0.955	0.1308	-0.25571	67.03
92949	ADAMTS like 1	ADAMTSL1	-0.179496	0.124807	0.612	0.1169	-1.53491	193
9719	ADAMTS like 2	ADAMTSL2	0.114573	0.230439	0.71	0.0955	1.19923	3176.25
57188	ADAMTS like 3	ADAMTSL3	0.00148715	0.985462	0.997	0.0816	0.0182211	219.02
54507	ADAMTS like 4	ADAMTSL4	0.0965534	0.543717	0.876	0.159	0.607201	178.32
574406	ADAMTSL4 antisense RNA 1	ADAMTSL4-AS1	-0.13304	0.406699	0.816	0.1603	-0.829717	16.72
100289061	ADAMTSL4 antisense RNA 2	ADAMTSL4-AS2	-0.0845312	0.48046	0.849	0.1198	-0.705563	28.35
339366	ADAMTS like 5	ADAMTSL5	-0.0591713	0.66427	0.918	0.1363	-0.434025	96.25
11033	ArfGAP with dual PH domains 1	ADAP1	0.0921469	0.400796	0.812	0.1097	0.840201	11236.7
55803	ArfGAP with dual PH domains 2	ADAP2	-0.0322964	0.761898	0.948	0.1066	-0.302989	301.59
103	adenosine deaminase RNA specific	ADAR	-0.0239129	0.718147	0.937	0.0663	-0.360936	10248.4
104	adenosine deaminase RNA specific B1	ADARB1	0.108303	0.128722	0.616	0.0713	1.51916	4504.94
105	adenosine deaminase RNA specific B2 (inactive)	ADARB2	-0.202976	0.0894403	0.568	0.1195	-1.69836	2565.13
642394	ADARB2 antisense RNA 1	ADARB2-AS1	-0.518605	0.0244599	0.445	0.2305	-2.24983	47.49
23536	adenosine deaminase tRNA specific 1	ADAT1	0.00859269	0.888775	0.978	0.0614	0.139855	1283.73
134637	adenosine deaminase tRNA specific 2	ADAT2	-0.109382	0.119314	0.604	0.0702	-1.55766	173.86
113179	adenosine deaminase tRNA specific 3	ADAT3	-0.195541	0.230676	0.71	0.1631	-1.19862	120.22
57143	aarF domain containing kinase 1	ADCK1	-0.05152	0.481609	0.849	0.0732	-0.703717	663.26
90956	aarF domain containing kinase 2	ADCK2	0.0993124	0.21012	0.693	0.0792	1.25324	1416.19
203054	aarF domain containing kinase 5	ADCK5	0.0746297	0.370065	0.797	0.0833	0.896351	567.43
107	adenylate cyclase 1	ADCY1	0.10522	0.243053	0.72	0.0901	1.16739	30571.4
55811	adenylate cyclase 10	ADCY10	0.157624	0.422409	0.824	0.1965	0.802249	42.15
221442	ADCY10 pseudogene 1	ADCY10P1	-0.267595	0.1009	0.582	0.1631	-1.6405	206.2
108	adenylate cyclase 2	ADCY2	0.0464831	0.471705	0.844	0.0646	0.719707	9036.03
109	adenylate cyclase 3	ADCY3	0.0197451	0.814698	0.959	0.0842	0.23437	4069.42
196883	adenylate cyclase 4	ADCY4	0.201875	0.0720514	0.545	0.1122	1.79879	390.16
111	adenylate cyclase 5	ADCY5	0.0799565	0.394938	0.809	0.094	0.850696	11947.1
112	adenylate cyclase 6	ADCY6	-0.00455305	0.936437	0.989	0.0571	-0.0797486	2782.81
113	adenylate cyclase 7	ADCY7	0.111272	0.27097	0.74	0.1011	1.10083	890.04
114	adenylate cyclase 8	ADCY8	-0.068355	0.347022	0.785	0.0727	-0.940382	723.87
115	adenylate cyclase 9	ADCY9	0.0124386	0.874007	0.975	0.0784	0.158571	2287.49
116	adenylate cyclase activating polypeptide 1	ADCYAP1	0.16467	0.246837	0.722	0.1422	1.15807	892.04
117	ADCYAP receptor type I	ADCYAP1R1	-0.086875	0.371645	0.798	0.0972	-0.893396	7128.97
118	adducin 1	ADD1	0.0132933	0.794273	0.955	0.051	0.260766	19843
119	adducin 2	ADD2	0.0426343	0.576947	0.889	0.0764	0.55785	14997.7
120	adducin 3	ADD3	-0.25744	0.0238059	0.441	0.1139	-2.26025	4742.92
100505933	ADD3 antisense RNA 1	ADD3-AS1	-0.171558	0.0948712	0.572	0.1027	-1.67024	73.41
84435	adhesion G protein-coupled receptor A1	ADGRA1	0.10964	0.209127	0.692	0.0873	1.25597	7187.54
100128127	ADGRA1 antisense RNA 1	ADGRA1-AS1	-0.0160515	0.886414	0.978	0.1124	-0.142843	154.07
25960	adhesion G protein-coupled receptor A2	ADGRA2	0.0262107	0.85871	0.971	0.1472	0.178017	2421.09
166647	adhesion G protein-coupled receptor A3	ADGRA3	-0.277967	0.0864175	0.564	0.1621	-1.71461	900.88
575	adhesion G protein-coupled receptor B1	ADGRB1	-0.0294312	0.793232	0.955	0.1123	-0.262116	19914.9
576	adhesion G protein-coupled receptor B2	ADGRB2	0.110694	0.261629	0.733	0.0986	1.12255	46057.6
577	adhesion G protein-coupled receptor B3	ADGRB3	0.0038007	0.966615	0.993	0.0908	0.0418544	3787.93
101928307	ADGRB3 divergent transcript	ADGRB3-DT	0.0107811	0.929236	0.987	0.1214	0.0888057	377.7
283383	adhesion G protein-coupled receptor D1	ADGRD1	0.272246	0.0279623	0.455	0.1239	2.19782	266.36
30817	adhesion G protein-coupled receptor E2	ADGRE2	-0.0693782	0.767784	0.95	0.235	-0.295274	103.27
976	adhesion G protein-coupled receptor E5	ADGRE5	-0.138243	0.343008	0.783	0.1458	-0.948239	407.84
165082	adhesion G protein-coupled receptor F3	ADGRF3	-0.089969	0.320351	0.769	0.0905	-0.993738	59.8
221395	adhesion G protein-coupled receptor F5	ADGRF5	0.0187257	0.870475	0.974	0.1148	0.163055	1548.55
9289	adhesion G protein-coupled receptor G1	ADGRG1	-0.145118	0.392305	0.808	0.1696	-0.855445	6183.48
10149	adhesion G protein-coupled receptor G2	ADGRG2	-0.125636	0.363745	0.794	0.1383	-0.908252	28.34
222487	adhesion G protein-coupled receptor G3	ADGRG3	0.00026342	0.99862	1	0.1523	0.0017297	854.22
221188	adhesion G protein-coupled receptor G5	ADGRG5	0.0727135	0.678499	0.923	0.1754	0.414513	18.02
57211	adhesion G protein-coupled receptor G6	ADGRG6	0.0108624	0.943752	0.99	0.154	0.0705543	98.75
22859	adhesion G protein-coupled receptor L1	ADGRL1	0.0911852	0.258934	0.731	0.0808	1.12891	34582.8
100507373	ADGRL1 antisense RNA 1	ADGRL1-AS1	0.0158705	0.856227	0.971	0.0876	0.181179	1572.68
23266	adhesion G protein-coupled receptor L2	ADGRL2	0.0648459	0.463245	0.842	0.0884	0.733513	2718.31
23284	adhesion G protein-coupled receptor L3	ADGRL3	-0.0952873	0.282135	0.746	0.0886	-1.07554	4615.9
101927186	ADGRL3 antisense RNA 1	ADGRL3-AS1	-0.0880199	0.341868	0.783	0.0926	-0.95048	34.44
64123	adhesion G protein-coupled receptor L4	ADGRL4	0.0720241	0.518679	0.867	0.1116	0.645383	219.01
84059	adhesion G protein-coupled receptor V1	ADGRV1	-0.401795	0.016187	0.424	0.1671	-2.40467	1702.6
125	alcohol dehydrogenase 1B (class I), beta polypeptide	ADH1B	0.403644	0.0856096	0.564	0.2348	1.71903	23.52
128	alcohol dehydrogenase 5 (class III), chi polypeptide	ADH5	0.0188843	0.728657	0.939	0.0544	0.346913	1976.57
[truncated: 22,370 more rows]

## Sheet: nAcc Schizophrenia vs Control
GeneID	Description	Symbol	log2FoldChange	pvalue	padj	lfcSE	stat	baseMean	up:2203	down:99
[truncated: 23,212 more rows]

[truncated: 5 more sheets: nAcc Bipolar Disorder vs Contro, nAcc Major Depression vs Contro, DLPFC Schizophrenia vs Control, DLPFC Bipolar Disorder vs Contr, DLPFC Major Depression vs Contr]
